# Supplementary material for: Canonical, deprotonated, or zwitterionic? II. A computational study on amino acid interaction with the TiO2(110) rutile surface: comparison with the anatase (101) surface
Source: Royal Society of Chemistry journal article supplement (doi:10.1039/d0cp01429j), 2020-01-01
Supplement: d0cp01429j1.pdf [file d0cp01429j1.pdf]

Electronic Supplementary Material

**Canonical, Deprotonated, or Zwitterionic? II. A Computational Study  
on Amino Acid Interaction with the TiO<sub>2</sub> (110) Rutile Surface:  
Comparison with the Anatase (101) Surface**

S. Pantaleone,<sup>a,b,\*</sup> A. Rimola,<sup>a,\*</sup> M. Sodupe<sup>a</sup>

*<sup>a</sup>Departament de Química, Universitat Autònoma de Barcelona, 08193 Bellaterra,  
Catalonia, Spain*

*<sup>b</sup>current address: Dipartimento di Chimica and Nanostructured Interfaces and Surfaces  
(NIS), Università degli Studi di Torino, Via P. Giuria 7, 10125 Torino, Italy*

**E-mail corresponding authors:**

[stefano.pantaleone@unito.it](mailto:stefano.pantaleone@unito.it)

[albert.rimola@uab.cat](mailto:albert.rimola@uab.cat)

## Surface energies of TiO<sub>2</sub> (110) rutile and (101) anatase surfaces

In order to choose the proper thickness of the surface, slab models from 1 up to 7 layers have been investigated (Figure S1) to identify the minimum thickness that leads to converged properties. To that purpose, the surface formation energy has been used as reference, following the equation:

$$E_S = \frac{E_n - nE_{bulk}}{2A}$$

where  $E_n$  is the energy of the surface containing  $n$  layers,  $E_{bulk}$  is the energy of the bulk, and  $A$  is the area of the surface.

The TiO<sub>2</sub> (110) rutile has a higher surface formation energy than the (101) anatase one:  $E_S = 0.80 \text{ J m}^{-2}$  for a rutile 5-layer slab model and  $E_S = 0.37 \text{ J m}^{-2}$  for an anatase 3-layer slab model). The rutile (110) surface exhibits a slower convergence of the surface formation energy as a function of the slab thickness in comparison with the anatase one (see Figures S1 and S2). Accordingly, rutile (110) needs to use a larger number of layers than anatase (101) to reach well  $E_S$ -converged stable slab models.

The TiO<sub>2</sub> (110) rutile 5-layer slab model has been chosen for the amino acids adsorption because it represents the best compromise between the chemical accuracy and the computational cost.

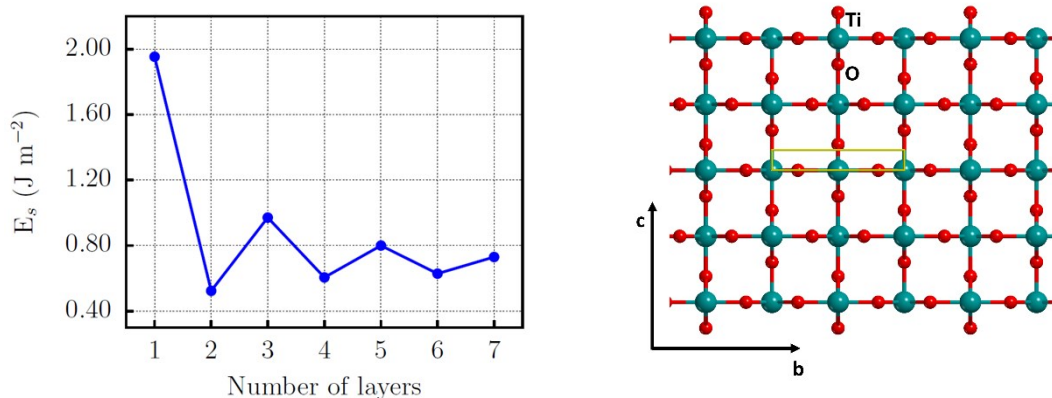

**Figure S1.** Surface formation energy of the TiO<sub>2</sub> (110) rutile surface (left), and PBE-D2\* optimized structure (right).

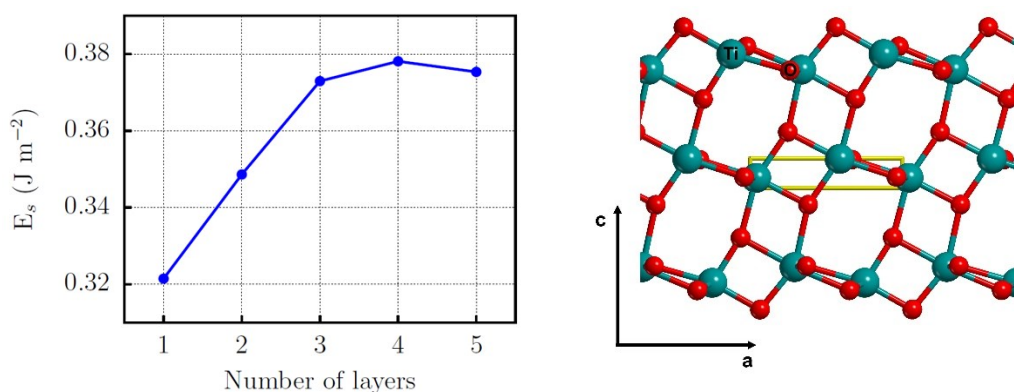

**Figure S2.** Surface formation energy of the  $\text{TiO}_2$  (101) anatase surface (left), and PBE-D2\* optimized structure (right).

Due to the oscillating behavior of the surface energy of the rutile (110) surfaces as a function of the number of layers, in a previous work we run some test calculations on the adsorption of a single water on  $\text{TiO}_2$  (110) rutile<sup>1</sup> from the 4-layer to the 7-layer surface models. Results are summarized in Table S1. The converged value seems to lay between the 4- and 5-layer models, with a percentage error around 10%. Moreover, we also run a test-case on the most stable adsorption mode of glycine on the 9-layer (110) rutile surface, and we obtain an adsorption energy of  $213.1 \text{ kJ mol}^{-1}$ , which, compared to the one obtained for the 5-layer model ( $238.3 \text{ kJ mol}^{-1}$ ), returns an error of about 10%, similar to that for the water case.

**Table S1.** Adsorption energies ( $\Delta E_{\text{ads}}$ ) of water adsorbed on  $\text{TiO}_2$  (110) rutile surface models of increasing thickness.

| Surface model | $\Delta E_{\text{ads}}$ (kJ/mol) |
|---------------|----------------------------------|
| 4 layer       | -86.9                            |
| 5 layer       | -105.6                           |
| 6 layer       | -89.8                            |
| 7 layer       | -95.0                            |

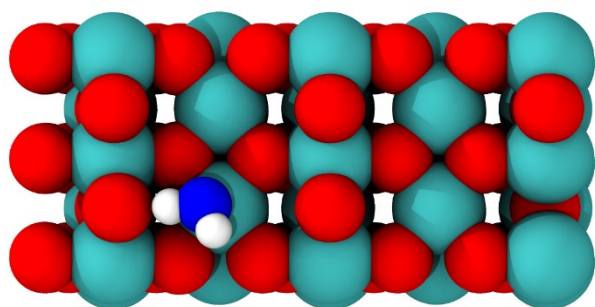

**Figure S3.** Water adsorbed on the  $\text{TiO}_2$  (110) rutile surface.

**Gas-phase amino acids in their corresponding most stable conformations**

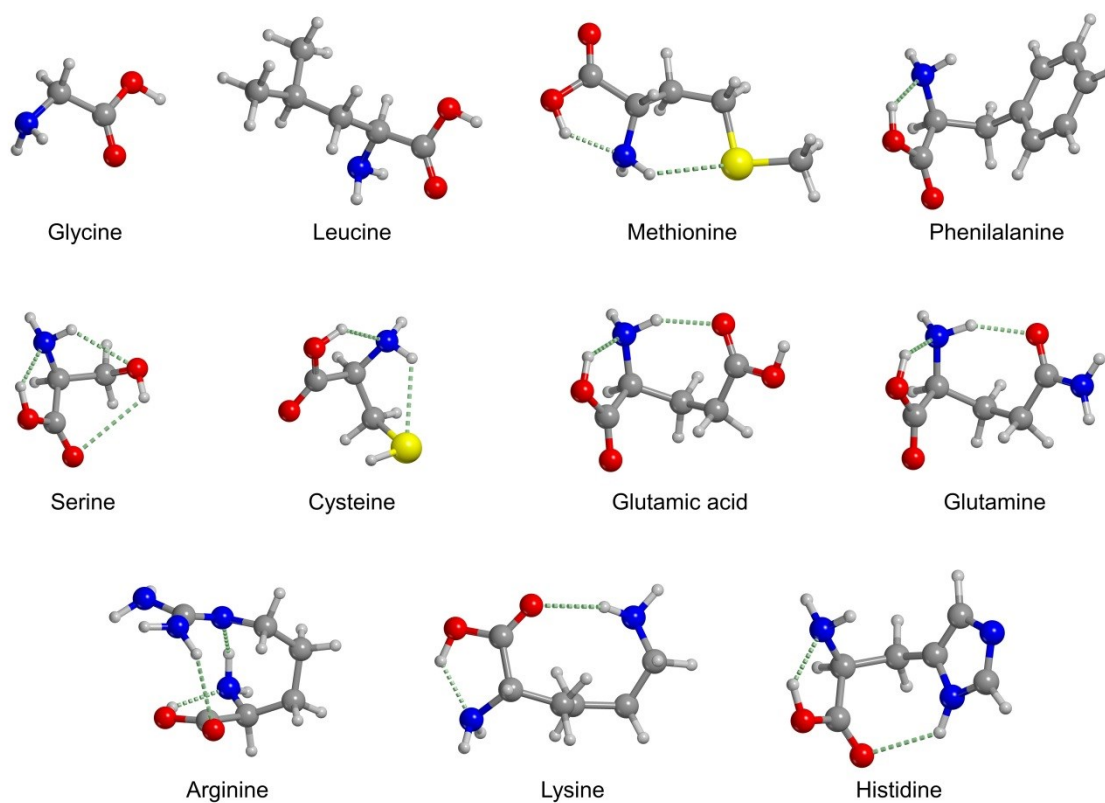

**Figure S4.** PBE-D2\* optimized geometries for the studied amino acids in their most stable conformation in gas phase. Carbon in grey, oxygen in red, nitrogen in blue, sulfur in yellow, hydrogen in white.

### Glu/rutile complex with Ti-O dative lateral interactions

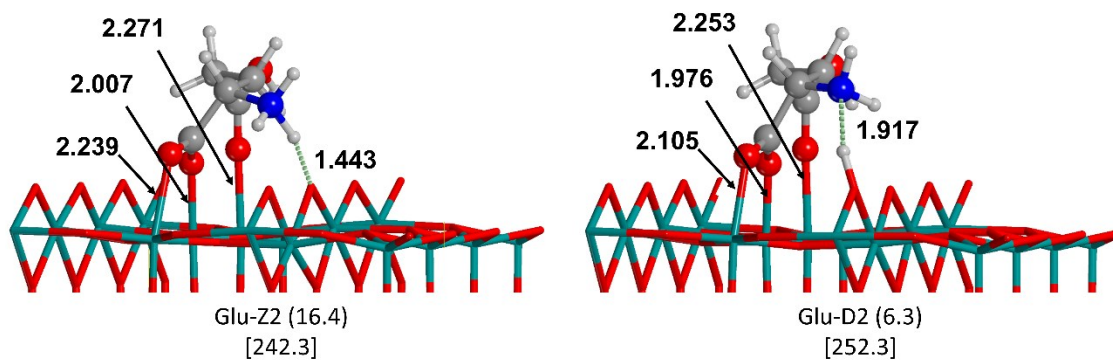

**Figure S5.** PBE-D2\* optimized geometries for glutamic acid (Glu) adsorbed on the  $\text{TiO}_2$  (110) rutile surface. Values in round and square parenthesis (in  $\text{kJ mol}^{-1}$ ) are the relative energies with respect to the most stable structure reported in the main text, and the adsorption energies, respectively. Bond distances are in Å.

## Optimized structures

In the following we report the optimized structures reported in the main text and in the ESI in POSCAR format.

### *Amino acids in gas phase*

GLY

```
1.000000000
 30.000000  0.000000  0.000000
 0.000000  30.000000  0.000000
 0.000000  0.000000  30.000000
H C N O
5 2 1 2
Cartesian
1.23265278 -1.00016301 0.87577303 #H
1.23265278 -1.00016301 -0.87577397 #H
-1.01355022 -1.90565901 -0.81540797 #H
-1.01355022 -1.90565901 0.81540703 #H
0.58987978 2.31726199 0.00000003 #H
0.57016378 -0.90761101 0.00000003 #C
0.01261978 0.51209999 0.00000003 #C
-0.40386022 -1.98072901 0.00000003 #N
-1.16813222 0.81468199 0.00000003 #O
1.01941578 1.43642099 0.00000003 #O
```

LEU

```
1.000000000
 30.000000  0.000000  0.000000
 0.000000  30.000000  0.000000
 0.000000  0.000000  30.000000
H C N O
13 6 1 2
Cartesian
-1.41249298 -0.47595831 1.83101461 #H
-2.59089401 -0.10543235 0.76641384 #H
-1.08258035 0.26799045 -0.98747782 #H
1.05959987 -0.23406850 1.14312093 #H
1.37769436 -0.04502744 -0.58692169 #H
0.09407164 2.08794677 1.19046368 #H
3.00532379 1.86557652 0.20317960 #H
2.32941623 3.23076089 1.11440147 #H
2.45983630 1.63233550 1.87830667 #H
-0.52108088 2.40390846 -1.20357165 #H
0.62220667 3.65589243 -0.70209192 #H
1.18982524 2.28474599 -1.67789579 #H
-0.15451268 -2.96178360 -1.70373313 #H
-0.72239357 -0.22382799 -0.07016536 #C
0.70972434 0.27709770 0.22901635 #C
-0.65838679 -1.72552700 -0.36058893 #C
0.82969073 1.79850004 0.42270121 #C
2.23193064 2.15001385 0.93464406 #C
0.50953341 2.57336669 -0.86039627 #C
```

-1.62700139 0.11282140 1.02218403 #N  
-0.95526402 -2.61126438 0.42496075 #O  
-0.19925367 -1.98545941 -1.62116409 #O

MET

1.000000000  
30.000000 0.000000 0.000000  
0.000000 30.000000 0.000000  
0.000000 0.000000 30.000000

H C N O S

11 5 1 2 1

Cartesian

-0.77110274 0.93830403 0.92258857 #H  
0.07305789 -0.54612381 -1.61245883 #H  
-0.26699325 1.18631437 -1.60592149 #H  
2.13409734 0.85552681 -1.38536072 #H  
1.49994571 1.57393644 0.11545785 #H  
4.40227890 0.19445553 -0.25687663 #H  
3.84397367 0.93868327 1.28128674 #H  
4.47991962 -0.72868094 1.26945979 #H  
-0.75913371 -1.88427282 0.17462065 #H  
-0.27890085 -1.17293794 1.56989683 #H  
-2.79799574 -0.91434064 0.78130735 #H  
-0.95862659 0.17506412 0.14658634 #C  
0.07545298 0.35334735 -0.97330869 #C  
1.49703797 0.66497016 -0.50808751 #C  
3.89707915 0.00720176 0.70099329 #C  
-2.38992468 0.49103519 -0.35950145 #C  
-0.98126040 -1.13244713 0.83066625 #N  
-2.64258639 1.37393762 -1.16007167 #O  
-3.33385556 -0.28295443 0.21245256 #O  
2.25316682 -0.69730665 0.44270602 #S

PHE

1.000000000  
30.000000 0.000000 0.000000  
0.000000 30.000000 0.000000  
0.000000 0.000000 30.000000

H C N O

11 9 1 2

Cartesian

-1.49385375 0.44629161 2.51267678 #H  
-1.54985578 -1.38262390 0.84188211 #H  
-2.47476297 0.05760861 0.36395642 #H  
0.73048049 -1.79860698 -0.27263902 #H  
-1.98148545 1.25248201 -1.65026500 #H  
1.97947238 -1.64770158 -2.41090460 #H  
-0.72421481 1.41383137 -3.78366934 #H  
1.09804913 1.45900686 2.24074238 #H  
-0.24578712 1.96859172 0.37151997 #H  
-1.19866373 2.48841959 1.61677189 #H  
1.26580026 -0.03734432 -4.17343310 #H  
-0.79330514 0.44732219 1.66177126 #C

|             |             |             |    |
|-------------|-------------|-------------|----|
| 0.46196384  | -0.27995560 | 2.20714079  | #C |
| -1.45857754 | -0.33907589 | 0.50836859  | #C |
| -0.70273103 | -0.26872962 | -0.79912727 | #C |
| 0.41561620  | -1.08723344 | -1.03765680 | #C |
| -1.09653246 | 0.62959575  | -1.80469404 | #C |
| 1.11685054  | -1.00111023 | -2.24185577 | #C |
| -0.39496837 | 0.71581637  | -3.01203860 | #C |
| 0.71746615  | -0.09828174 | -3.23191940 | #C |
| -0.44742014 | 1.84825817  | 1.36726460  | #N |
| 0.51978152  | -1.48582152 | 2.37566436  | #O |
| 1.46330220  | 0.56405023  | 2.51905845  | #O |

SER

|             |           |           |
|-------------|-----------|-----------|
| 1.000000000 |           |           |
| 30.000000   | 0.000000  | 0.000000  |
| 0.000000    | 30.000000 | 0.000000  |
| 0.000000    | 0.000000  | 30.000000 |

H C N O  
7 3 1 3

Cartesian

|             |             |             |    |
|-------------|-------------|-------------|----|
| -0.51485472 | 0.34502858  | 1.73602296  | #H |
| -0.63050391 | 1.87099001  | -0.58192304 | #H |
| -1.95096476 | -0.10972287 | -0.75983211 | #H |
| -2.52229145 | 0.49986058  | 0.66511075  | #H |
| 0.64982785  | -1.74917734 | 1.13532507  | #H |
| -1.12418934 | -1.98971058 | 1.14900121  | #H |
| 0.56560621  | -1.81248113 | -1.10241471 | #H |
| -0.49718532 | 0.02971314  | 0.67849341  | #C |
| 0.71347190  | 0.75871429  | 0.04758343  | #C |
| -0.29298078 | -1.48935474 | 0.62968825  | #C |
| -1.72810142 | 0.50702595  | 0.02661382  | #N |
| 1.86192156  | 0.36213198  | 0.15412836  | #O |
| 0.37264392  | 1.87815043  | -0.61759843 | #O |
| -0.31588345 | -1.97240663 | -0.71882970 | #O |

CYS

|             |           |           |
|-------------|-----------|-----------|
| 1.000000000 |           |           |
| 30.000000   | 0.000000  | 0.000000  |
| 0.000000    | 30.000000 | 0.000000  |
| 0.000000    | 0.000000  | 30.000000 |

H C N O S  
7 3 1 2 1

Cartesian

|             |             |             |    |
|-------------|-------------|-------------|----|
| 0.82021658  | 0.83469577  | 1.69707002  | #H |
| 1.90534658  | 1.00827577  | -0.85418998 | #H |
| -0.33246342 | 1.82551577  | -0.78844998 | #H |
| 0.31093658  | 2.67892577  | 0.47742002  | #H |
| -0.96349342 | -0.88126423 | 1.55632002  | #H |
| -1.63004342 | 0.77129577  | 1.58175002  | #H |
| -1.35801342 | -1.32668423 | -0.92609998 | #H |
| 0.35594658  | 0.61663577  | 0.71850002  | #C |
| 1.26851658  | -0.46228423 | 0.08624002  | #C |
| -1.04774342 | 0.05297577  | 0.98779002  | #C |



|             |             |             |    |
|-------------|-------------|-------------|----|
| 0.41789658  | 1.83912577  | -0.08954998 | #N |
| 1.21284658  | -1.64224423 | 0.38292002  | #O |
| 2.15341658  | 0.03965577  | -0.79580998 | #O |
| -2.03933342 | -0.23580423 | -0.51264998 | #S |

GLU

|             |           |           |  |
|-------------|-----------|-----------|--|
| 1.000000000 |           |           |  |
| 30.000000   | 0.000000  | 0.000000  |  |
| 0.000000    | 30.000000 | 0.000000  |  |
| 0.000000    | 0.000000  | 30.000000 |  |

H C N O  
9 5 1 4

Cartesian

|             |             |             |    |
|-------------|-------------|-------------|----|
| -0.09850734 | 1.89939394  | 0.04525152  | #H |
| -3.61492734 | -0.02226606 | -1.12650848 | #H |
| 1.95656266  | 0.58388394  | 1.58013152  | #H |
| 0.43845266  | -1.08943606 | 2.07496152  | #H |
| -0.48795734 | 0.41467394  | 2.17595152  | #H |
| -0.54807734 | -1.52876606 | -0.22779848 | #H |
| -1.63513734 | -1.65961606 | 1.12766152  | #H |
| 1.20940266  | 2.53826394  | 0.83914152  | #H |
| 1.82259266  | 1.17996394  | -1.17404848 | #H |
| 1.18352266  | 0.45960394  | 0.80428152  | #C |
| 1.85815266  | -0.42780606 | -0.27249848 | #C |
| 0.00357266  | -0.27769606 | 1.47519152  | #C |
| -1.03933734 | -0.92969606 | 0.55799152  | #C |
| -2.01476734 | -0.00058606 | -0.11803848 | #C |
| 0.90610266  | 1.78719394  | 0.22269152  | #N |
| 2.08344266  | -1.61680606 | -0.11346848 | #O |
| -1.94677734 | 1.22183394  | -0.17723848 | #O |
| -3.04013734 | -0.68655606 | -0.69078848 | #O |
| 2.17720266  | 0.25398394  | -1.38524848 | #O |

GLN

|             |           |           |  |
|-------------|-----------|-----------|--|
| 1.000000000 |           |           |  |
| 30.000000   | 0.000000  | 0.000000  |  |
| 0.000000    | 30.000000 | 0.000000  |  |
| 0.000000    | 0.000000  | 30.000000 |  |

H C N O  
10 5 2 3

Cartesian

|             |             |             |    |
|-------------|-------------|-------------|----|
| -0.15607658 | 1.88159529  | -0.05093105 | #H |
| -3.07965658 | -1.68285471 | -0.77993105 | #H |
| -3.71346658 | -0.13689471 | -1.27677105 | #H |
| 1.95144342  | 0.70740529  | 1.50567895  | #H |
| 0.45390342  | -0.93819471 | 2.14362895  | #H |
| -0.48746658 | 0.56236529  | 2.13446895  | #H |
| -0.54279658 | -1.55169471 | -0.10988105 | #H |
| -1.61800658 | -1.58436471 | 1.27339895  | #H |
| 1.20313342  | 2.58465529  | 0.59514895  | #H |
| 1.71881342  | 1.06104529  | -1.30576105 | #H |
| 1.17209342  | 0.51387529  | 0.75067895  | #C |
| 1.84062342  | -0.45220471 | -0.25869105 | #C |

|             |             |             |    |
|-------------|-------------|-------------|----|
| 0.00508342  | -0.17915471 | 1.48737895  | #C |
| -1.04144658 | -0.90062471 | 0.62788895  | #C |
| -2.04040658 | -0.00963471 | -0.09890105 | #C |
| 0.86186342  | 1.78397529  | 0.06667895  | #N |
| -3.04494658 | -0.67293471 | -0.73617105 | #N |
| 2.11565342  | -1.61261471 | 0.00244895  | #O |
| -1.97880658 | 1.22838529  | -0.11441105 | #O |
| 2.09145342  | 0.12621529  | -1.44513105 | #O |

ARG

|             |           |           |
|-------------|-----------|-----------|
| 1.000000000 |           |           |
| 30.000000   | 0.000000  | 0.000000  |
| 0.000000    | 30.000000 | 0.000000  |
| 0.000000    | 0.000000  | 30.000000 |

H C N O  
14 6 4 2

Cartesian

|             |             |             |    |
|-------------|-------------|-------------|----|
| -1.96933393 | -2.23275908 | -0.02639639 | #H |
| 0.54351713  | -2.18132394 | 0.70603047  | #H |
| -1.62269684 | -1.71772153 | 2.21665560  | #H |
| -0.52368710 | -0.50800229 | 1.84796014  | #H |
| -2.49498531 | -0.08208636 | -1.20500927 | #H |
| -3.38020269 | -0.41125722 | 0.28675292  | #H |
| -2.81995133 | 1.94843280  | 0.11299783  | #H |
| -2.05729120 | 1.25465261  | 1.54108136  | #H |
| -0.59356138 | 1.70619415  | -1.10221609 | #H |
| -0.65640201 | 2.90217570  | 0.20203016  | #H |
| 2.37487531  | 0.50082347  | 1.95491626  | #H |
| 2.88185102  | 1.21801624  | -1.37323684 | #H |
| 3.30406344  | 0.05669238  | 0.61150900  | #H |
| 1.23812693  | 1.19520553  | -1.79316696 | #H |
| -1.42338126 | -1.29558327 | 0.19031631  | #C |
| -0.21707243 | -1.36278440 | -0.77297192 | #C |
| -2.38977664 | -0.13400887 | -0.10997502 | #C |
| -2.02830341 | 1.25453049  | 0.43849885  | #C |
| -0.67347909 | 1.81526371  | -0.00372527 | #C |
| 1.59211379  | 1.10576795  | 0.21076718  | #C |
| -0.90062420 | -1.42179192 | 1.56111902  | #N |
| 0.41087946  | 1.18323601  | 0.73676277  | #N |
| 2.67107877  | 0.74360406  | 1.01379652  | #N |
| 1.93276559  | 1.43434825  | -1.08983555 | #N |
| 0.82714574  | -2.04240590 | -0.24843883 | #O |
| -0.20635674 | -0.92371912 | -1.91206944 | #O |

LYS

|             |           |           |
|-------------|-----------|-----------|
| 1.000000000 |           |           |
| 30.000000   | 0.000000  | 0.000000  |
| 0.000000    | 30.000000 | 0.000000  |
| 0.000000    | 0.000000  | 30.000000 |

H C N O  
14 6 2 2

Cartesian

|            |             |            |    |
|------------|-------------|------------|----|
| 3.08765780 | -0.04332680 | 0.09379304 | #H |
|------------|-------------|------------|----|

|             |             |             |    |
|-------------|-------------|-------------|----|
| 1.44333352  | -0.18002454 | -2.11247901 | #H |
| 2.40789998  | -2.09831930 | -1.43193676 | #H |
| 1.79728360  | -2.05455012 | 0.09511113  | #H |
| -0.49019145 | -1.62590488 | -1.68876893 | #H |
| -0.83969653 | 0.07064217  | -1.34285070 | #H |
| -0.33138147 | -0.48413372 | 1.16535031  | #H |
| -0.38256753 | -2.18363943 | 0.69848233  | #H |
| -2.52184497 | -1.54990215 | 1.60411031  | #H |
| -2.74479202 | -1.87921104 | -0.12335102 | #H |
| -2.89047500 | 0.51062011  | -0.63682759 | #H |
| -4.01023976 | 0.09871828  | 0.66363246  | #H |
| -2.97851976 | 1.99398420  | 1.43563107  | #H |
| -1.47122835 | 1.53882586  | 0.99319355  | #H |
| -2.93985756 | 0.20001953  | 0.42691711  | #C |
| -2.28486812 | -1.17872492 | 0.59490893  | #C |
| -0.75826695 | -1.18244396 | 0.42634254  | #C |
| -0.28172530 | -0.80549050 | -0.98301840 | #C |
| 1.20665503  | -0.44020638 | -1.06630358 | #C |
| 1.50554975  | 0.85724278  | -0.27605005 | #C |
| -2.36305574 | 1.18561449  | 1.34890668  | #N |
| 2.17556186  | -1.47736064 | -0.65824233 | #N |
| 2.72718473  | 0.87066196  | 0.29228768  | #O |
| 0.72916777  | 1.79562546  | -0.20142381 | #O |

HIS

1.000000000

30.000000 0.000000 0.000000

0.000000 30.000000 0.000000

0.000000 0.000000 30.000000

H C N O

9 6 3 2

Cartesian

|             |             |             |    |
|-------------|-------------|-------------|----|
| -0.66485541 | -1.71827554 | 0.46332648  | #H |
| 2.25820459  | 1.18542446  | 1.10218648  | #H |
| 0.29358459  | 0.21885446  | 2.17010648  | #H |
| -0.05019541 | 1.86675446  | 1.62325648  | #H |
| -2.34657541 | 2.10887446  | 0.00139648  | #H |
| -2.88382541 | -1.97074554 | -0.82705352 | #H |
| 2.43844459  | 0.28827446  | -1.46171352 | #H |
| 0.51497459  | 1.66843446  | -1.18919352 | #H |
| 1.69173459  | 2.63436446  | -0.55282352 | #H |
| 1.44020459  | 0.83169446  | 0.45162648  | #C |
| 0.13298459  | 0.83991446  | 1.27597648  | #C |
| -1.06552541 | 0.37226446  | 0.51896648  | #C |
| -2.14255541 | 1.04159446  | -0.03547352 | #C |
| -2.47224541 | -1.03009554 | -0.47321352 | #C |
| 1.84944459  | -0.60456554 | 0.04904648  | #C |
| -1.29902541 | -0.95965554 | 0.22418648  | #N |
| -3.01196541 | 0.16458446  | -0.64782352 | #N |
| 1.44475459  | 1.66745446  | -0.75864352 | #N |
| 2.50272459  | -0.65685554 | -1.12347352 | #O |
| 1.62256459  | -1.59179554 | 0.73326648  | #O |

*Amino acids adsorbed on rutile*

Rut-Gly\_D1

1.000000000

|          |           |           |
|----------|-----------|-----------|
| 8.876100 | 0.000000  | 0.000000  |
| 0.000000 | 12.992946 | 0.000000  |
| 0.000000 | 0.000000  | 30.000000 |

H C N O Ti

5 2 1 122 60

Cartesian

|            |            |             |    |
|------------|------------|-------------|----|
| 6.34353000 | 4.49238572 | 6.22099473  | #H |
| 4.54671000 | 4.55578572 | 6.26435473  | #H |
| 6.50854000 | 6.67735572 | 4.03966473  | #H |
| 4.68280000 | 6.58925572 | 4.93835473  | #H |
| 5.72964000 | 6.79057572 | 6.21386473  | #H |
| 5.39936000 | 4.10388572 | 4.33245473  | #C |
| 5.44329000 | 4.80895572 | 5.67931473  | #C |
| 5.55629000 | 6.25193572 | 5.36445473  | #N |
| 6.52075000 | 3.87635572 | 3.76789473  | #O |
| 4.25456000 | 3.90537572 | 3.80455473  | #O |
| 0.91942000 | 0.49472572 | 3.02259473  | #O |
| 2.36939000 | 4.99934572 | 1.87075473  | #O |
| 2.38143000 | 2.52746572 | 1.87366473  | #O |
| 0.92170000 | 0.48745572 | 0.44272473  | #O |
| 0.91964000 | 3.75822572 | 29.72058473 | #O |
| 2.39625000 | 1.79578572 | 28.45205473 | #O |
| 2.38663000 | 5.72732572 | 28.47098473 | #O |
| 0.91754000 | 3.76850572 | 27.17064473 | #O |
| 0.92359000 | 0.50186572 | 26.45622473 | #O |
| 2.40171000 | 5.01794572 | 25.16305473 | #O |
| 2.39957000 | 2.50856572 | 25.17026473 | #O |
| 0.92460000 | 0.50919572 | 23.85340473 | #O |
| 0.91589000 | 3.77367572 | 23.16843473 | #O |
| 2.39647000 | 1.81220572 | 21.86412473 | #O |
| 2.39626000 | 5.71685572 | 21.83127473 | #O |
| 0.91345000 | 3.76306572 | 20.59192473 | #O |
| 0.91558000 | 0.50483572 | 19.87885473 | #O |
| 2.39298000 | 4.98224572 | 18.41971473 | #O |
| 2.39150000 | 2.54133572 | 18.44116473 | #O |
| 0.91187000 | 0.51575572 | 17.29801473 | #O |
| 3.88705000 | 0.52900572 | 3.01147473  | #O |
| 5.36076000 | 5.02121572 | 1.64070473  | #O |
| 5.35339000 | 2.49372572 | 1.70534473  | #O |
| 3.86125000 | 0.45399572 | 0.43165473  | #O |
| 3.83501000 | 3.75206572 | 29.76698473 | #O |
| 5.35826000 | 1.79478572 | 28.49167473 | #O |
| 5.35267000 | 5.72751572 | 28.50760473 | #O |
| 3.90233000 | 3.76946572 | 27.19539473 | #O |
| 3.88560000 | 0.50221572 | 26.45828473 | #O |
| 5.34930000 | 5.02033572 | 25.16238473 | #O |
| 5.35410000 | 2.50880572 | 25.16263473 | #O |
| 3.88521000 | 0.50588572 | 23.85226473 | #O |
| 3.87292000 | 3.77218572 | 23.16961473 | #O |
| 5.35584000 | 1.81099572 | 21.86331473 | #O |
| 5.35146000 | 5.71583572 | 21.83338473 | #O |
| 3.87293000 | 3.75947572 | 20.59094473 | #O |

|            |             |             |    |
|------------|-------------|-------------|----|
| 3.87632000 | 0.50529572  | 19.87762473 | #O |
| 5.35072000 | 4.98287572  | 18.42147473 | #O |
| 5.35111000 | 2.54147572  | 18.43972473 | #O |
| 3.86922000 | 0.51542572  | 17.29583473 | #O |
| 6.82812000 | 0.53361572  | 3.01123473  | #O |
| 8.34197000 | 5.00390572  | 1.84692473  | #O |
| 8.34050000 | 2.52675572  | 1.86164473  | #O |
| 6.85372000 | 0.45126572  | 0.43557473  | #O |
| 6.87335000 | 3.74949572  | 29.75803473 | #O |
| 8.31991000 | 1.79684572  | 28.45800473 | #O |
| 8.31664000 | 5.72697572  | 28.47969473 | #O |
| 6.80738000 | 3.76840572  | 27.19050473 | #O |
| 6.84244000 | 0.50430572  | 26.45914473 | #O |
| 8.30830000 | 5.01506572  | 25.16464473 | #O |
| 8.30974000 | 2.50986572  | 25.16711473 | #O |
| 6.84380000 | 0.50668572  | 23.85291473 | #O |
| 6.83257000 | 3.77505572  | 23.17050473 | #O |
| 8.31333000 | 1.81369572  | 21.86456473 | #O |
| 8.31088000 | 5.71749572  | 21.83049473 | #O |
| 6.83182000 | 3.76100572  | 20.59208473 | #O |
| 6.83670000 | 0.50396572  | 19.87740473 | #O |
| 8.30904000 | 4.98340572  | 18.42477473 | #O |
| 8.30954000 | 2.54099572  | 18.44383473 | #O |
| 6.82950000 | 0.51756572  | 17.29741473 | #O |
| 0.90738000 | 6.99762572  | 3.09119473  | #O |
| 2.39867000 | 11.46451572 | 1.90577473  | #O |
| 2.39015000 | 9.03485572  | 1.96290473  | #O |
| 0.89099000 | 7.03966572  | 0.50484473  | #O |
| 0.91886000 | 10.23775572 | 29.75214473 | #O |
| 2.38612000 | 8.30134572  | 28.45295473 | #O |
| 2.39500000 | 12.18629572 | 28.44642473 | #O |
| 0.91658000 | 10.24346572 | 27.16078473 | #O |
| 0.92081000 | 7.00690572  | 26.42367473 | #O |
| 2.39518000 | 11.49879572 | 25.15369473 | #O |
| 2.39924000 | 8.99238572  | 25.15176473 | #O |
| 0.91768000 | 7.00592572  | 23.83852473 | #O |
| 0.91557000 | 10.24078572 | 23.14823473 | #O |
| 2.39722000 | 8.30583572  | 21.82553473 | #O |
| 2.39595000 | 12.19928572 | 21.85944473 | #O |
| 0.91322000 | 10.25432572 | 20.56989473 | #O |
| 0.91579000 | 7.01301572  | 19.82785473 | #O |
| 2.39100000 | 11.47100572 | 18.41572473 | #O |
| 2.39314000 | 9.03066572  | 18.39904473 | #O |
| 0.90851000 | 7.00158572  | 17.24033473 | #O |
| 3.92912000 | 6.96546572  | 3.02708473  | #O |
| 5.35500000 | 11.45402572 | 1.91657473  | #O |
| 5.35765000 | 9.02203572  | 1.89953473  | #O |
| 3.82283000 | 7.07091572  | 0.49307473  | #O |
| 3.87292000 | 10.24060572 | 29.74564473 | #O |
| 5.35262000 | 8.30561572  | 28.45242473 | #O |
| 5.35737000 | 12.18769572 | 28.44497473 | #O |
| 3.87206000 | 10.24271572 | 27.16357473 | #O |
| 3.88125000 | 7.00368572  | 26.45518473 | #O |
| 5.35524000 | 11.49893572 | 25.15582473 | #O |
| 5.34864000 | 8.99324572  | 25.15519473 | #O |

|            |             |             |     |
|------------|-------------|-------------|-----|
| 3.87508000 | 7.00797572  | 23.84349473 | #O  |
| 3.87246000 | 10.24370572 | 23.14860473 | #O  |
| 5.35113000 | 8.30628572  | 21.82761473 | #O  |
| 5.35590000 | 12.19875572 | 21.85781473 | #O  |
| 3.87258000 | 10.25635572 | 20.56790473 | #O  |
| 3.87280000 | 7.01090572  | 19.82187473 | #O  |
| 5.35131000 | 11.47118572 | 18.41499473 | #O  |
| 5.34937000 | 9.03032572  | 18.39909473 | #O  |
| 3.86920000 | 7.00092572  | 17.23808473 | #O  |
| 6.80009000 | 6.95429572  | 3.09036473  | #O  |
| 8.31308000 | 11.46074572 | 1.90876473  | #O  |
| 8.31241000 | 9.02578572  | 1.94274473  | #O  |
| 6.84816000 | 7.07844572  | 0.47000473  | #O  |
| 6.83497000 | 10.24262572 | 29.74301473 | #O  |
| 8.32076000 | 8.30508572  | 28.45967473 | #O  |
| 8.32308000 | 12.18741572 | 28.44971473 | #O  |
| 6.83573000 | 10.24101572 | 27.16067473 | #O  |
| 6.83155000 | 7.00754572  | 26.45517473 | #O  |
| 8.31333000 | 11.49971572 | 25.15461473 | #O  |
| 8.31005000 | 8.99739572  | 25.14853473 | #O  |
| 6.82807000 | 7.00814572  | 23.85355473 | #O  |
| 6.83067000 | 10.24117572 | 23.14799473 | #O  |
| 8.31070000 | 8.30381572  | 21.82864473 | #O  |
| 8.31545000 | 12.19751572 | 21.86029473 | #O  |
| 6.83206000 | 10.25560572 | 20.56851473 | #O  |
| 6.82886000 | 7.01324572  | 19.82893473 | #O  |
| 8.30926000 | 11.47110572 | 18.41727473 | #O  |
| 8.31028000 | 9.03026572  | 18.40295473 | #O  |
| 6.83131000 | 7.00128572  | 17.24106473 | #O  |
| 0.92369000 | 3.76921572  | 1.51631473  | #Ti |
| 2.39562000 | 0.50195572  | 1.93103473  | #Ti |
| 0.90964000 | 0.52027572  | 28.57272473 | #Ti |
| 2.43690000 | 3.75759572  | 28.39494473 | #Ti |
| 0.89989000 | 3.75281572  | 25.22421473 | #Ti |
| 2.25700000 | 0.51244572  | 25.15870473 | #Ti |
| 0.91424000 | 0.51958572  | 21.74883473 | #Ti |
| 2.39537000 | 3.76916572  | 21.98864473 | #Ti |
| 0.91218000 | 3.76069572  | 18.78529473 | #Ti |
| 2.38736000 | 0.51487572  | 18.38584473 | #Ti |
| 3.88423000 | 3.73136572  | 1.78137473  | #Ti |
| 5.35690000 | 0.48883572  | 1.91147473  | #Ti |
| 3.87832000 | 0.51830572  | 28.57083473 | #Ti |
| 5.34950000 | 3.77560572  | 28.59698473 | #Ti |
| 3.86473000 | 3.76266572  | 25.25017473 | #Ti |
| 5.21520000 | 0.51032572  | 25.15604473 | #Ti |
| 3.87034000 | 0.51845572  | 21.74848473 | #Ti |
| 5.35069000 | 3.76994572  | 21.99602473 | #Ti |
| 3.87123000 | 3.76017572  | 18.78374473 | #Ti |
| 5.34555000 | 0.51468572  | 18.38322473 | #Ti |
| 6.84624000 | 3.74495572  | 1.75249473  | #Ti |
| 8.31590000 | 0.50225572  | 1.93033473  | #Ti |
| 6.83266000 | 0.51416572  | 28.57094473 | #Ti |
| 8.27160000 | 3.77088572  | 28.38120473 | #Ti |
| 6.81046000 | 3.75930572  | 25.24616473 | #Ti |
| 8.17459000 | 0.51510572  | 25.15829473 | #Ti |

|            |             |             |     |
|------------|-------------|-------------|-----|
| 6.82284000 | 0.51715572  | 21.74736473 | #Ti |
| 8.30729000 | 3.75837572  | 21.98937473 | #Ti |
| 6.82965000 | 3.76013572  | 18.78493473 | #Ti |
| 8.30506000 | 0.51428572  | 18.38632473 | #Ti |
| 0.91683000 | 10.25480572 | 1.56934473  | #Ti |
| 2.44593000 | 7.00000572  | 1.97890473  | #Ti |
| 0.93259000 | 7.01296572  | 28.65540473 | #Ti |
| 2.39139000 | 10.27740572 | 28.36874473 | #Ti |
| 0.89254000 | 10.25258572 | 25.16003473 | #Ti |
| 2.31107000 | 6.99593572  | 25.02643473 | #Ti |
| 0.90639000 | 7.01161572  | 21.68568473 | #Ti |
| 2.39174000 | 10.26109572 | 21.94953473 | #Ti |
| 0.91224000 | 10.25268572 | 18.75505473 | #Ti |
| 2.38637000 | 7.00172572  | 18.32308473 | #Ti |
| 3.87571000 | 10.24013572 | 1.55999473  | #Ti |
| 5.25539000 | 6.98946572  | 1.65711473  | #Ti |
| 3.86489000 | 7.01806572  | 28.26870473 | #Ti |
| 5.35246000 | 10.26334572 | 28.36116473 | #Ti |
| 3.85004000 | 10.24555572 | 25.16229473 | #Ti |
| 5.37842000 | 7.00381572  | 24.99491473 | #Ti |
| 3.87068000 | 7.01146572  | 21.66619473 | #Ti |
| 5.34886000 | 10.25739572 | 21.94982473 | #Ti |
| 3.87080000 | 10.25421572 | 18.75294473 | #Ti |
| 5.34881000 | 7.00183572  | 18.32084473 | #Ti |
| 6.83294000 | 10.22961572 | 1.55790473  | #Ti |
| 8.36640000 | 7.00142572  | 1.99460473  | #Ti |
| 6.83592000 | 7.02041572  | 28.57626473 | #Ti |
| 8.31285000 | 10.26120572 | 28.36335473 | #Ti |
| 6.81162000 | 10.25476572 | 25.15817473 | #Ti |
| 8.29417000 | 6.99838572  | 25.28829473 | #Ti |
| 6.83751000 | 7.00960572  | 21.68271473 | #Ti |
| 8.30877000 | 10.26965572 | 21.95004473 | #Ti |
| 6.82957000 | 10.25282572 | 18.75395473 | #Ti |
| 8.30726000 | 7.00193572  | 18.33156473 | #Ti |

Rut-Gly\_D2

1.000000000

|          |           |           |
|----------|-----------|-----------|
| 8.876100 | 0.000000  | 0.000000  |
| 0.000000 | 12.992946 | 0.000000  |
| 0.000000 | 0.000000  | 30.000000 |

H C N O Ti

5 2 1 122 60

Cartesian

|            |            |            |    |
|------------|------------|------------|----|
| 6.16795000 | 5.56488912 | 5.71882641 | #H |
| 5.16502000 | 4.26413912 | 6.41353641 | #H |
| 3.21286000 | 5.44110912 | 5.60716641 | #H |
| 4.14069000 | 6.58941912 | 6.34095641 | #H |
| 3.96441000 | 6.70557912 | 4.02068641 | #H |
| 5.30532000 | 4.25763912 | 4.27536641 | #C |
| 5.23401000 | 5.00469912 | 5.59523641 | #C |
| 4.09890000 | 5.94694912 | 5.54855641 | #N |
| 6.44933000 | 4.00816912 | 3.77441641 | #O |
| 4.18354000 | 3.98690912 | 3.72955641 | #O |
| 0.90505000 | 0.59174912 | 2.99484641 | #O |

|            |            |             |    |
|------------|------------|-------------|----|
| 2.35515000 | 5.09843912 | 1.81138641  | #O |
| 2.35922000 | 2.62301912 | 1.83618641  | #O |
| 0.90731000 | 0.58366912 | 0.41277641  | #O |
| 0.90526000 | 3.84749912 | 29.68592641 | #O |
| 2.38831000 | 1.88924912 | 28.42409641 | #O |
| 2.38700000 | 5.81978912 | 28.44680641 | #O |
| 0.90348000 | 3.85811912 | 27.13823641 | #O |
| 0.91760000 | 0.60055912 | 26.42264641 | #O |
| 2.39162000 | 5.11182912 | 25.13771641 | #O |
| 2.39313000 | 2.60648912 | 25.13451641 | #O |
| 0.92226000 | 0.60574912 | 23.81762641 | #O |
| 0.91045000 | 3.87099912 | 23.13754641 | #O |
| 2.39427000 | 1.91306912 | 21.82912641 | #O |
| 2.39214000 | 5.81658912 | 21.80591641 | #O |
| 0.91160000 | 3.86071912 | 20.56045641 | #O |
| 0.91542000 | 0.60763912 | 19.84146641 | #O |
| 2.39128000 | 5.08293912 | 18.39324641 | #O |
| 2.39341000 | 2.64205912 | 18.40753641 | #O |
| 0.91140000 | 0.61753912 | 17.26250641 | #O |
| 3.87261000 | 0.62884912 | 2.98329641  | #O |
| 5.33696000 | 5.11413912 | 1.60880641  | #O |
| 5.34507000 | 2.58645912 | 1.67018641  | #O |
| 3.84947000 | 0.54552912 | 0.40431641  | #O |
| 3.82400000 | 3.84328912 | 29.72499641 | #O |
| 5.34824000 | 1.88938912 | 28.46459641 | #O |
| 5.34823000 | 5.82162912 | 28.47731641 | #O |
| 3.89605000 | 3.86048912 | 27.15950641 | #O |
| 3.87923000 | 0.60120912 | 26.42541641 | #O |
| 5.34972000 | 5.11729912 | 25.13197641 | #O |
| 5.34853000 | 2.60601912 | 25.12973641 | #O |
| 3.87868000 | 0.60326912 | 23.81878641 | #O |
| 3.87012000 | 3.87032912 | 23.13950641 | #O |
| 5.35117000 | 1.91091912 | 21.82884641 | #O |
| 5.35285000 | 5.81526912 | 21.80587641 | #O |
| 3.87106000 | 3.86355912 | 20.56138641 | #O |
| 3.87242000 | 0.60514912 | 19.84265641 | #O |
| 5.35057000 | 5.08358912 | 18.39294641 | #O |
| 5.34916000 | 2.64173912 | 18.40502641 | #O |
| 3.87027000 | 0.61557912 | 17.26003641 | #O |
| 6.81357000 | 0.62707912 | 2.98008641  | #O |
| 8.33116000 | 5.09366912 | 1.83377641  | #O |
| 8.31777000 | 2.62208912 | 1.84342641  | #O |
| 6.84593000 | 0.54636912 | 0.40273641  | #O |
| 6.86353000 | 3.84668912 | 29.73746641 | #O |
| 8.30997000 | 1.89028912 | 28.42676641 | #O |
| 8.31433000 | 5.82054912 | 28.44556641 | #O |
| 6.79761000 | 3.86113912 | 27.16548641 | #O |
| 6.83476000 | 0.60161912 | 26.42680641 | #O |
| 8.29799000 | 5.11497912 | 25.13528641 | #O |
| 8.30322000 | 2.60657912 | 25.13413641 | #O |
| 6.83854000 | 0.60370912 | 23.81905641 | #O |
| 6.83004000 | 3.86864912 | 23.13933641 | #O |
| 8.31209000 | 1.91061912 | 21.82855641 | #O |
| 8.30725000 | 5.81541912 | 21.80436641 | #O |
| 6.83079000 | 3.85672912 | 20.55959641 | #O |



|            |             |             |    |
|------------|-------------|-------------|----|
| 6.83283000 | 0.60857912  | 19.84123641 | #O |
| 8.30817000 | 5.08293912  | 18.39545641 | #O |
| 8.30950000 | 2.64259912  | 18.40368641 | #O |
| 6.82938000 | 0.61589912  | 17.26108641 | #O |
| 0.91780000 | 7.09063912  | 3.05224641  | #O |
| 2.38645000 | 11.55713912 | 1.88592641  | #O |
| 2.38601000 | 9.12384912  | 1.90415641  | #O |
| 0.92842000 | 7.13688912  | 0.46351641  | #O |
| 0.90738000 | 10.33741912 | 29.72083641 | #O |
| 2.38272000 | 8.40126912  | 28.42974641 | #O |
| 2.38467000 | 12.28228912 | 28.41605641 | #O |
| 0.90617000 | 10.33773912 | 27.12991641 | #O |
| 0.90434000 | 7.10572912  | 26.40870641 | #O |
| 2.39085000 | 11.59774912 | 25.12411641 | #O |
| 2.38902000 | 9.09490912  | 25.11770641 | #O |
| 0.90622000 | 7.10199912  | 23.82032641 | #O |
| 0.90799000 | 10.34648912 | 23.11634641 | #O |
| 2.39145000 | 8.40401912  | 21.80297641 | #O |
| 2.39452000 | 12.29740912 | 21.82437641 | #O |
| 0.91267000 | 10.35275912 | 20.53742641 | #O |
| 0.91083000 | 7.11231912  | 19.80440641 | #O |
| 2.39111000 | 11.57181912 | 18.37924641 | #O |
| 2.39101000 | 9.13160912  | 18.36964641 | #O |
| 0.91145000 | 7.10045912  | 17.21683641 | #O |
| 3.88334000 | 7.05067912  | 3.05900641  | #O |
| 5.34674000 | 11.55198912 | 1.88414641  | #O |
| 5.33940000 | 9.11966912  | 1.87859641  | #O |
| 3.85170000 | 7.17556912  | 0.44313641  | #O |
| 3.86669000 | 10.34206912 | 29.71345641 | #O |
| 5.34828000 | 8.40089912  | 28.42691641 | #O |
| 5.34962000 | 12.28235912 | 28.41439641 | #O |
| 3.86672000 | 10.33546912 | 27.12960641 | #O |
| 3.87327000 | 7.10593912  | 26.41470641 | #O |
| 5.34958000 | 11.59663912 | 25.12531641 | #O |
| 5.35091000 | 9.09102912  | 25.12059641 | #O |
| 3.87313000 | 7.10472912  | 23.81978641 | #O |
| 3.87063000 | 10.34360912 | 23.11616641 | #O |
| 5.35178000 | 8.40586912  | 21.80232641 | #O |
| 5.35213000 | 12.29824912 | 21.82055641 | #O |
| 3.86899000 | 10.35355912 | 20.53646641 | #O |
| 3.87209000 | 7.11138912  | 19.80407641 | #O |
| 5.35003000 | 11.57289912 | 18.38224641 | #O |
| 5.34825000 | 9.13218912  | 18.36698641 | #O |
| 3.86735000 | 7.10218912  | 17.21519641 | #O |
| 6.77361000 | 7.04709912  | 3.00970641  | #O |
| 8.30020000 | 11.56125912 | 1.87484641  | #O |
| 8.30919000 | 9.12903912  | 1.92987641  | #O |
| 6.86677000 | 7.16680912  | 0.47652641  | #O |
| 6.82747000 | 10.33809912 | 29.71697641 | #O |
| 8.31300000 | 8.39769912  | 28.42986641 | #O |
| 8.31303000 | 12.28150912 | 28.41556641 | #O |
| 6.82868000 | 10.33685912 | 27.13241641 | #O |
| 6.82807000 | 7.10283912  | 26.43201641 | #O |
| 8.30697000 | 11.59728912 | 25.12358641 | #O |
| 8.30266000 | 9.09127912  | 25.12025641 | #O |

|            |             |             |     |
|------------|-------------|-------------|-----|
| 6.82658000 | 7.10456912  | 23.81995641 | #O  |
| 6.82936000 | 10.34735912 | 23.11577641 | #O  |
| 8.30752000 | 8.40631912  | 21.80167641 | #O  |
| 8.31200000 | 12.29873912 | 21.81846641 | #O  |
| 6.82790000 | 10.35322912 | 20.53495641 | #O  |
| 6.82912000 | 7.11449912  | 19.79852641 | #O  |
| 8.30831000 | 11.57261912 | 18.38491641 | #O  |
| 8.30876000 | 9.13192912  | 18.37016641 | #O  |
| 6.82991000 | 7.10049912  | 17.21583641 | #O  |
| 0.90082000 | 3.86342912  | 1.48169641  | #Ti |
| 2.38108000 | 0.60086912  | 1.90162641  | #Ti |
| 0.91346000 | 0.61642912  | 28.54139641 | #Ti |
| 2.42174000 | 3.87359912  | 28.34086641 | #Ti |
| 0.89124000 | 3.85162912  | 25.19029641 | #Ti |
| 2.24909000 | 0.61233912  | 25.12346641 | #Ti |
| 0.90334000 | 0.62231912  | 21.71247641 | #Ti |
| 2.39129000 | 3.86226912  | 21.95804641 | #Ti |
| 0.91204000 | 3.86029912  | 18.75343641 | #Ti |
| 2.38885000 | 0.61526912  | 18.34894641 | #Ti |
| 3.85494000 | 3.84300912  | 1.70592641  | #Ti |
| 5.33918000 | 0.58430912  | 1.88143641  | #Ti |
| 3.86139000 | 0.61201912  | 28.53937641 | #Ti |
| 5.34606000 | 3.87006912  | 28.56197641 | #Ti |
| 3.85802000 | 3.85303912  | 25.21191641 | #Ti |
| 5.20833000 | 0.60769912  | 25.12313641 | #Ti |
| 3.87142000 | 0.62267912  | 21.71129641 | #Ti |
| 5.34915000 | 3.87345912  | 21.96512641 | #Ti |
| 3.87055000 | 3.86082912  | 18.75399641 | #Ti |
| 5.34811000 | 0.61545912  | 18.34773641 | #Ti |
| 6.81616000 | 3.82073912  | 1.74879641  | #Ti |
| 8.30200000 | 0.59538912  | 1.90132641  | #Ti |
| 6.81811000 | 0.61224912  | 28.54265641 | #Ti |
| 8.25839000 | 3.84979912  | 28.36871641 | #Ti |
| 6.80407000 | 3.86043912  | 25.21988641 | #Ti |
| 8.16592000 | 0.61144912  | 25.12779641 | #Ti |
| 6.82514000 | 0.62100912  | 21.71346641 | #Ti |
| 8.30317000 | 3.87313912  | 21.95635641 | #Ti |
| 6.82900000 | 3.85989912  | 18.75224641 | #Ti |
| 8.30597000 | 0.61625912  | 18.35100641 | #Ti |
| 0.90534000 | 10.35289912 | 1.53777641  | #Ti |
| 2.31295000 | 7.10299912  | 1.93166641  | #Ti |
| 0.88772000 | 7.10968912  | 28.59773641 | #Ti |
| 2.38323000 | 10.35457912 | 28.33061641 | #Ti |
| 0.88082000 | 10.35098912 | 25.12911641 | #Ti |
| 2.38437000 | 7.09577912  | 25.26486641 | #Ti |
| 0.91901000 | 7.11469912  | 21.66183641 | #Ti |
| 2.38700000 | 10.37592912 | 21.91910641 | #Ti |
| 0.91148000 | 10.35433912 | 18.72261641 | #Ti |
| 2.38920000 | 7.10277912  | 18.30646641 | #Ti |
| 3.86566000 | 10.32993912 | 1.52805641  | #Ti |
| 5.45234000 | 7.08449912  | 1.68734641  | #Ti |
| 3.86814000 | 7.11970912  | 28.57913641 | #Ti |
| 5.34334000 | 10.36168912 | 28.33116641 | #Ti |
| 3.83840000 | 10.35200912 | 25.12610641 | #Ti |
| 5.29161000 | 7.10106912  | 24.98479641 | #Ti |

|            |             |             |     |
|------------|-------------|-------------|-----|
| 3.86301000 | 7.11461912  | 21.66040641 | #Ti |
| 5.34726000 | 10.36352912 | 21.91807641 | #Ti |
| 3.86967000 | 10.35487912 | 18.72173641 | #Ti |
| 5.34605000 | 7.10339912  | 18.29715641 | #Ti |
| 6.82311000 | 10.33270912 | 1.53100641  | #Ti |
| 8.24749000 | 7.09183912  | 1.93731641  | #Ti |
| 6.83145000 | 7.11305912  | 28.24788641 | #Ti |
| 8.30406000 | 10.37476912 | 28.33958641 | #Ti |
| 6.80027000 | 10.34488912 | 25.13134641 | #Ti |
| 8.35889000 | 7.09541912  | 24.98682641 | #Ti |
| 6.82877000 | 7.11467912  | 21.64329641 | #Ti |
| 8.30456000 | 10.36366912 | 21.91678641 | #Ti |
| 6.82866000 | 10.35480912 | 18.72091641 | #Ti |
| 8.30937000 | 7.10287912  | 18.30122641 | #Ti |

Rut-Gly-D3

1.000000000

|          |           |           |
|----------|-----------|-----------|
| 8.876100 | 0.000000  | 0.000000  |
| 0.000000 | 12.992946 | 0.000000  |
| 0.000000 | 0.000000  | 30.000000 |

H C N O Ti

5 2 1 122 60

Cartesian

|            |            |             |    |
|------------|------------|-------------|----|
| 2.91706000 | 3.06367373 | 4.14960139  | #H |
| 3.38125000 | 4.65144373 | 4.20961139  | #H |
| 4.48447000 | 3.44052373 | 5.97194139  | #H |
| 5.08155000 | 2.28455373 | 4.72598139  | #H |
| 6.69198000 | 6.44324373 | 3.95464139  | #H |
| 5.96662000 | 4.26302373 | 4.64673139  | #C |
| 4.79979000 | 3.32519373 | 4.92442139  | #C |
| 3.70298000 | 3.70093373 | 3.99124139  | #N |
| 6.85103000 | 3.80167373 | 3.78731139  | #O |
| 6.02558000 | 5.39124373 | 5.14325139  | #O |
| 0.89748000 | 0.45831373 | 3.00715139  | #O |
| 2.33966000 | 4.94455373 | 1.85643139  | #O |
| 2.34416000 | 2.46350373 | 1.81878139  | #O |
| 0.89169000 | 0.42299373 | 0.42543139  | #O |
| 0.91549000 | 3.70566373 | 29.67772139 | #O |
| 2.37487000 | 1.74979373 | 28.44103139 | #O |
| 2.37036000 | 5.67796373 | 28.45077139 | #O |
| 0.88807000 | 3.71720373 | 27.15233139 | #O |
| 0.88794000 | 0.45570373 | 26.44549139 | #O |
| 2.38549000 | 4.96996373 | 25.15453139 | #O |
| 2.38192000 | 2.46016373 | 25.15507139 | #O |
| 0.89011000 | 0.45918373 | 23.83994139 | #O |
| 0.90196000 | 3.72526373 | 23.15559139 | #O |
| 2.37697000 | 1.76318373 | 21.84876139 | #O |
| 2.38133000 | 5.66793373 | 21.82517139 | #O |
| 0.89933000 | 3.71395373 | 20.57930139 | #O |
| 0.89593000 | 0.45940373 | 19.86084139 | #O |
| 2.38173000 | 4.93546373 | 18.41364139 | #O |
| 2.38008000 | 2.49375373 | 18.42504139 | #O |
| 0.90259000 | 0.46950373 | 17.27916139 | #O |
| 3.85353000 | 0.49879373 | 3.00463139  | #O |
| 5.32175000 | 4.95345373 | 1.79365139  | #O |
| 5.32744000 | 2.45604373 | 1.78410139  | #O |

|            |             |             |    |
|------------|-------------|-------------|----|
| 3.84402000 | 0.40924373  | 0.42424139  | #O |
| 3.82133000 | 3.71231373  | 29.75054139 | #O |
| 5.33035000 | 1.74588373  | 28.47923139 | #O |
| 5.33207000 | 5.68028373  | 28.48905139 | #O |
| 3.88934000 | 3.71851373  | 27.17287139 | #O |
| 3.84858000 | 0.45410373  | 26.44931139 | #O |
| 5.33741000 | 4.97106373  | 25.14891139 | #O |
| 5.33780000 | 2.45904373  | 25.14965139 | #O |
| 3.84904000 | 0.45795373  | 23.84171139 | #O |
| 3.85768000 | 3.72202373  | 23.15649139 | #O |
| 5.33775000 | 1.76286373  | 21.84985139 | #O |
| 5.33636000 | 5.66880373  | 21.82904139 | #O |
| 3.86038000 | 3.71195373  | 20.57860139 | #O |
| 3.85632000 | 0.46013373  | 19.86004139 | #O |
| 5.33943000 | 4.93560373  | 18.41288139 | #O |
| 5.34040000 | 2.49371373  | 18.42684139 | #O |
| 3.86167000 | 0.46692373  | 17.27847139 | #O |
| 6.80785000 | 0.48206373  | 3.00623139  | #O |
| 8.34173000 | 4.97061373  | 1.75184139  | #O |
| 8.33411000 | 2.47517373  | 1.82805139  | #O |
| 6.81434000 | 0.41269373  | 0.43309139  | #O |
| 6.83586000 | 3.70926373  | 29.76500139 | #O |
| 8.29158000 | 1.74695373  | 28.45542139 | #O |
| 8.29465000 | 5.67942373  | 28.47110139 | #O |
| 6.79208000 | 3.71587373  | 27.18536139 | #O |
| 6.80372000 | 0.45728373  | 26.45219139 | #O |
| 8.29194000 | 4.96577373  | 25.15379139 | #O |
| 8.29165000 | 2.45975373  | 25.15275139 | #O |
| 6.80835000 | 0.45651373  | 23.84335139 | #O |
| 6.81753000 | 3.72456373  | 23.15996139 | #O |
| 8.29540000 | 1.76531373  | 21.85040139 | #O |
| 8.29723000 | 5.66985373  | 21.82579139 | #O |
| 6.81730000 | 3.71538373  | 20.58165139 | #O |
| 6.81792000 | 0.45714373  | 19.86145139 | #O |
| 8.29798000 | 4.93621373  | 18.41797139 | #O |
| 8.29751000 | 2.49404373  | 18.42946139 | #O |
| 6.81987000 | 0.46978373  | 17.27998139 | #O |
| 0.88651000 | 6.93348373  | 3.04964139  | #O |
| 2.37762000 | 11.41482373 | 1.89554139  | #O |
| 2.36751000 | 8.98056373  | 1.93193139  | #O |
| 0.88614000 | 7.00465373  | 0.46332139  | #O |
| 0.89671000 | 10.19722373 | 29.73882139 | #O |
| 2.37427000 | 8.25640373  | 28.44294139 | #O |
| 2.37151000 | 12.13950373 | 28.43436139 | #O |
| 0.89539000 | 10.19443373 | 27.15192139 | #O |
| 0.89817000 | 6.96095373  | 26.43200139 | #O |
| 2.37611000 | 11.45155373 | 25.14681139 | #O |
| 2.38216000 | 8.94508373  | 25.14362139 | #O |
| 0.90311000 | 6.95755373  | 23.83998139 | #O |
| 0.90091000 | 10.19707373 | 23.13871139 | #O |
| 2.38163000 | 8.25904373  | 21.82439139 | #O |
| 2.37727000 | 12.15210373 | 21.84182139 | #O |
| 0.89996000 | 10.20528373 | 20.55936139 | #O |
| 0.90192000 | 6.96834373  | 19.82548139 | #O |
| 2.38049000 | 11.42538373 | 18.40696139 | #O |

|            |             |             |     |
|------------|-------------|-------------|-----|
| 2.38244000 | 8.98427373  | 18.39255139 | #O  |
| 0.90020000 | 6.95331373  | 17.23841139 | #O  |
| 3.87392000 | 6.90885373  | 3.03191139  | #O  |
| 5.32758000 | 11.40635373 | 1.91280139  | #O  |
| 5.33584000 | 8.97035373  | 1.90600139  | #O  |
| 3.83380000 | 6.99664373  | 0.49289139  | #O  |
| 3.85216000 | 10.19467373 | 29.73855139 | #O  |
| 5.33372000 | 8.25912373  | 28.44267139 | #O  |
| 5.33133000 | 12.14092373 | 28.43692139 | #O  |
| 3.85589000 | 10.19702373 | 27.15347139 | #O  |
| 3.85843000 | 6.95736373  | 26.44723139 | #O  |
| 5.33568000 | 11.45154373 | 25.14568139 | #O  |
| 5.33322000 | 8.94593373  | 25.14553139 | #O  |
| 3.85656000 | 6.96144373  | 23.83908139 | #O  |
| 3.86009000 | 10.20004373 | 23.13928139 | #O  |
| 5.33614000 | 8.26000373  | 21.82262139 | #O  |
| 5.33659000 | 12.15245373 | 21.84135139 | #O  |
| 3.85883000 | 10.20688373 | 20.55943139 | #O  |
| 3.85868000 | 6.96501373  | 19.81924139 | #O  |
| 5.34004000 | 11.42523373 | 18.40484139 | #O  |
| 5.33912000 | 8.98455373  | 18.39410139 | #O  |
| 3.86180000 | 6.95597373  | 17.23724139 | #O  |
| 6.81693000 | 6.91551373  | 3.07918139  | #O  |
| 8.28876000 | 11.40970373 | 1.90806139  | #O  |
| 8.29054000 | 8.97418373  | 1.90372139  | #O  |
| 6.80612000 | 7.01422373  | 0.46670139  | #O  |
| 6.80931000 | 10.19988373 | 29.73928139 | #O  |
| 8.29185000 | 8.26050373  | 28.45056139 | #O  |
| 8.29108000 | 12.14181373 | 28.43948139 | #O  |
| 6.81383000 | 10.19818373 | 27.15244139 | #O  |
| 6.80983000 | 6.95744373  | 26.43145139 | #O  |
| 8.29457000 | 11.45256373 | 25.14648139 | #O  |
| 8.29523000 | 8.94923373  | 25.14027139 | #O  |
| 6.81136000 | 6.96321373  | 23.84039139 | #O  |
| 6.81641000 | 10.19981373 | 23.13946139 | #O  |
| 8.29720000 | 8.25775373  | 21.82452139 | #O  |
| 8.29544000 | 12.15093373 | 21.84490139 | #O  |
| 6.81895000 | 10.20607373 | 20.55977139 | #O  |
| 6.81496000 | 6.96661373  | 19.82638139 | #O  |
| 8.29945000 | 11.42509373 | 18.40653139 | #O  |
| 8.29724000 | 8.98432373  | 18.39370139 | #O  |
| 6.82247000 | 6.95597373  | 17.23881139 | #O  |
| 0.91918000 | 3.71715373  | 1.46789139  | #Ti |
| 2.37373000 | 0.45880373  | 1.90298139  | #Ti |
| 0.89135000 | 0.47413373  | 28.55267139 | #Ti |
| 2.41204000 | 3.70670373  | 28.33269139 | #Ti |
| 0.91521000 | 3.70530373  | 25.20946139 | #Ti |
| 2.52004000 | 0.46679373  | 25.14401139 | #Ti |
| 0.90977000 | 0.47329373  | 21.72761139 | #Ti |
| 2.38413000 | 3.72410373  | 21.97269139 | #Ti |
| 0.90145000 | 3.71263373  | 18.77231139 | #Ti |
| 2.38530000 | 0.46774373  | 18.36550139 | #Ti |
| 3.89491000 | 3.67197373  | 1.69318139  | #Ti |
| 5.33812000 | 0.43454373  | 1.90293139  | #Ti |
| 3.86607000 | 0.47205373  | 28.55446139 | #Ti |

|            |             |             |     |
|------------|-------------|-------------|-----|
| 5.35710000 | 3.72404373  | 28.58692139 | #Ti |
| 3.88392000 | 3.71507373  | 25.23024139 | #Ti |
| 5.47747000 | 0.46177373  | 25.14504139 | #Ti |
| 3.86442000 | 0.47246373  | 21.72933139 | #Ti |
| 5.34072000 | 3.72471373  | 21.98398139 | #Ti |
| 3.86085000 | 3.71220373  | 18.77074139 | #Ti |
| 5.34307000 | 0.46771373  | 18.36591139 | #Ti |
| 6.87519000 | 3.71270373  | 1.87784139  | #Ti |
| 8.29477000 | 0.45057373  | 1.91733139  | #Ti |
| 6.82142000 | 0.46620373  | 28.55639139 | #Ti |
| 8.23987000 | 3.73430373  | 28.41059139 | #Ti |
| 6.82942000 | 3.70597373  | 25.23991139 | #Ti |
| 8.43646000 | 0.46482373  | 25.13962139 | #Ti |
| 6.81789000 | 0.47328373  | 21.72804139 | #Ti |
| 8.29554000 | 3.71281373  | 21.98027139 | #Ti |
| 6.81913000 | 3.71366373  | 18.77376139 | #Ti |
| 8.30251000 | 0.46749373  | 18.36626139 | #Ti |
| 0.89783000 | 10.20794373 | 1.55395139  | #Ti |
| 2.41646000 | 6.93968373  | 1.92581139  | #Ti |
| 0.92010000 | 6.96855373  | 28.58638139 | #Ti |
| 2.37797000 | 10.23431373 | 28.35627139 | #Ti |
| 0.93200000 | 10.20325373 | 25.14888139 | #Ti |
| 2.32598000 | 6.94741373  | 25.00413139 | #Ti |
| 0.89395000 | 6.96586373  | 21.68125139 | #Ti |
| 2.38341000 | 10.21416373 | 21.94006139 | #Ti |
| 0.90206000 | 10.20557373 | 18.74456139 | #Ti |
| 2.38157000 | 6.95495373  | 18.31895139 | #Ti |
| 3.84904000 | 10.18941373 | 1.55310139  | #Ti |
| 5.21438000 | 6.95154373  | 1.74523139  | #Ti |
| 3.85447000 | 6.96631373  | 28.26526139 | #Ti |
| 5.33694000 | 10.21776373 | 28.35485139 | #Ti |
| 3.88852000 | 10.20003373 | 25.15262139 | #Ti |
| 5.38971000 | 6.95530373  | 25.00825139 | #Ti |
| 3.86018000 | 6.96602373  | 21.66299139 | #Ti |
| 5.34043000 | 10.21388373 | 21.93963139 | #Ti |
| 3.86063000 | 10.20751373 | 18.74396139 | #Ti |
| 5.34434000 | 6.95597373  | 18.31934139 | #Ti |
| 6.81090000 | 10.18461373 | 1.55279139  | #Ti |
| 8.37379000 | 6.96209373  | 1.92651139  | #Ti |
| 6.80849000 | 6.97329373  | 28.61027139 | #Ti |
| 8.29670000 | 10.20799373 | 28.35176139 | #Ti |
| 6.85002000 | 10.20702373 | 25.14886139 | #Ti |
| 8.29134000 | 6.94938373  | 25.27929139 | #Ti |
| 6.82622000 | 6.96603373  | 21.68131139 | #Ti |
| 8.29969000 | 10.22628373 | 21.94053139 | #Ti |
| 6.81950000 | 10.20697373 | 18.74465139 | #Ti |
| 8.30109000 | 6.95574373  | 18.32773139 | #Ti |

Rut-Gly-Z

1.000000000

8.876100 0.000000 0.000000

0.000000 12.992946 0.000000

0.000000 0.000000 30.000000

H C N O Ti

5 2 1 122 60

Cartesian

|            |            |             |    |
|------------|------------|-------------|----|
| 6.33663000 | 4.99031000 | 19.77986000 | #H |
| 4.53145000 | 4.98824000 | 19.83007000 | #H |
| 6.20503000 | 6.85344000 | 18.05562000 | #H |
| 4.56699000 | 6.85030000 | 18.16535000 | #H |
| 5.45232000 | 7.26577000 | 19.57569000 | #H |
| 5.38906000 | 4.37942000 | 17.92413000 | #C |
| 5.41733000 | 5.19195000 | 19.21803000 | #C |
| 5.41013000 | 6.62235000 | 18.78220000 | #N |
| 6.52078000 | 4.13340000 | 17.40121000 | #O |
| 4.24347000 | 4.15494000 | 17.42320000 | #O |
| 0.92618000 | 0.76257000 | 16.64293000 | #O |
| 2.37999000 | 5.25964000 | 15.48291000 | #O |
| 2.38646000 | 2.78878000 | 15.48204000 | #O |
| 0.92671000 | 0.75286000 | 14.05915000 | #O |
| 0.92793000 | 4.02440000 | 13.33423000 | #O |
| 2.40213000 | 2.06517000 | 12.06923000 | #O |
| 2.40205000 | 5.99102000 | 12.08323000 | #O |
| 0.92299000 | 4.03267000 | 10.78339000 | #O |
| 0.92761000 | 0.77345000 | 10.07081000 | #O |
| 2.40706000 | 5.28817000 | 8.78060000  | #O |
| 2.40395000 | 2.77929000 | 8.78098000  | #O |
| 0.93022000 | 0.78036000 | 7.46516000  | #O |
| 0.91987000 | 4.04601000 | 6.78323000  | #O |
| 2.40003000 | 2.08693000 | 5.47589000  | #O |
| 2.40109000 | 5.98871000 | 5.45114000  | #O |
| 0.91834000 | 4.03780000 | 4.20655000  | #O |
| 0.91932000 | 0.77868000 | 3.49263000  | #O |
| 2.39562000 | 5.25637000 | 2.03833000  | #O |
| 2.39583000 | 2.81481000 | 2.05694000  | #O |
| 0.91476000 | 0.78837000 | 0.91098000  | #O |
| 3.89339000 | 0.79382000 | 16.62941000 | #O |
| 5.36578000 | 5.27998000 | 15.27154000 | #O |
| 5.36100000 | 2.75355000 | 15.31543000 | #O |
| 3.86684000 | 0.71867000 | 14.04913000 | #O |
| 3.84430000 | 4.01707000 | 13.37693000 | #O |
| 5.36465000 | 2.06206000 | 12.10785000 | #O |
| 5.36592000 | 5.99140000 | 12.11906000 | #O |
| 3.90940000 | 4.03304000 | 10.80716000 | #O |
| 3.88909000 | 0.77410000 | 10.07294000 | #O |
| 5.35532000 | 5.29063000 | 8.78049000  | #O |
| 5.35829000 | 2.77942000 | 8.77551000  | #O |
| 3.88850000 | 0.77599000 | 7.46488000  | #O |
| 3.87724000 | 4.04319000 | 6.78483000  | #O |
| 5.35963000 | 2.08489000 | 5.47561000  | #O |
| 5.35725000 | 5.98957000 | 5.45751000  | #O |
| 3.87849000 | 4.03517000 | 4.20682000  | #O |
| 3.88015000 | 0.77894000 | 3.48894000  | #O |
| 5.35449000 | 5.25588000 | 2.03932000  | #O |
| 5.35456000 | 2.81536000 | 2.05587000  | #O |
| 3.87333000 | 0.78913000 | 0.91028000  | #O |
| 6.83475000 | 0.79861000 | 16.63024000 | #O |
| 8.34511000 | 5.26196000 | 15.46114000 | #O |
| 8.34686000 | 2.79014000 | 15.47823000 | #O |

|            |             |             |    |
|------------|-------------|-------------|----|
| 6.86045000 | 0.71538000  | 14.05208000 | #O |
| 6.87733000 | 4.01480000  | 13.37245000 | #O |
| 8.32492000 | 2.06518000  | 12.07614000 | #O |
| 8.32618000 | 5.99147000  | 12.09677000 | #O |
| 6.81454000 | 4.03419000  | 10.80474000 | #O |
| 6.84673000 | 0.77539000  | 10.07404000 | #O |
| 8.31317000 | 5.28461000  | 8.78033000  | #O |
| 8.31425000 | 2.78003000  | 8.78165000  | #O |
| 6.84824000 | 0.77860000  | 7.46624000  | #O |
| 6.83689000 | 4.04353000  | 6.78607000  | #O |
| 8.31758000 | 2.08836000  | 5.47746000  | #O |
| 8.31554000 | 5.99086000  | 5.45505000  | #O |
| 6.83608000 | 4.03800000  | 4.20834000  | #O |
| 6.84108000 | 0.77755000  | 3.49075000  | #O |
| 8.31235000 | 5.25560000  | 2.03999000  | #O |
| 8.31357000 | 2.81459000  | 2.05646000  | #O |
| 6.83242000 | 0.78836000  | 0.91117000  | #O |
| 0.91817000 | 7.26363000  | 16.71034000 | #O |
| 2.40576000 | 11.73054000 | 15.52392000 | #O |
| 2.40057000 | 9.30240000  | 15.57894000 | #O |
| 0.93733000 | 7.30703000  | 14.11630000 | #O |
| 0.92732000 | 10.50725000 | 13.36813000 | #O |
| 2.40058000 | 8.57250000  | 12.06472000 | #O |
| 2.39990000 | 12.45583000 | 12.06050000 | #O |
| 0.92063000 | 10.51308000 | 10.77652000 | #O |
| 0.92569000 | 7.27831000  | 10.03024000 | #O |
| 2.39825000 | 11.77064000 | 8.77233000  | #O |
| 2.40478000 | 9.26443000  | 8.76706000  | #O |
| 0.92594000 | 7.27905000  | 7.45091000  | #O |
| 0.91990000 | 10.51933000 | 6.76640000  | #O |
| 2.40076000 | 8.58109000  | 5.44591000  | #O |
| 2.39971000 | 12.47353000 | 5.47154000  | #O |
| 0.91813000 | 10.52956000 | 4.18828000  | #O |
| 0.91931000 | 7.28538000  | 3.45216000  | #O |
| 2.39429000 | 11.74579000 | 2.03411000  | #O |
| 2.39620000 | 9.30509000  | 2.02079000  | #O |
| 0.91167000 | 7.27876000  | 0.86466000  | #O |
| 3.92449000 | 7.22530000  | 16.67070000 | #O |
| 5.35939000 | 11.72308000 | 15.53248000 | #O |
| 5.36640000 | 9.29414000  | 15.53401000 | #O |
| 3.85996000 | 7.34172000  | 14.10618000 | #O |
| 3.88100000 | 10.50976000 | 13.35965000 | #O |
| 5.36566000 | 8.57563000  | 12.06851000 | #O |
| 5.36368000 | 12.45815000 | 12.06001000 | #O |
| 3.87884000 | 10.51567000 | 10.77866000 | #O |
| 3.89497000 | 7.27550000  | 10.07697000 | #O |
| 5.35977000 | 11.77124000 | 8.77226000  | #O |
| 5.35485000 | 9.26493000  | 8.77259000  | #O |
| 3.88125000 | 7.27909000  | 7.45984000  | #O |
| 3.87677000 | 10.52066000 | 6.76612000  | #O |
| 5.35657000 | 8.58037000  | 5.44981000  | #O |
| 5.35948000 | 12.47402000 | 5.46908000  | #O |
| 3.87776000 | 10.52922000 | 4.18766000  | #O |
| 3.87761000 | 7.28182000  | 3.44553000  | #O |
| 5.35439000 | 11.74497000 | 2.03259000  | #O |



|            |             |             |     |
|------------|-------------|-------------|-----|
| 5.35349000 | 9.30453000  | 2.02400000  | #O  |
| 3.87227000 | 7.27628000  | 0.86492000  | #O  |
| 6.81234000 | 7.21674000  | 16.69518000 | #O  |
| 8.32265000 | 11.72908000 | 15.52994000 | #O  |
| 8.31893000 | 9.29843000  | 15.56161000 | #O  |
| 6.86180000 | 7.34078000  | 14.08332000 | #O  |
| 6.83988000 | 10.51408000 | 13.36059000 | #O  |
| 8.33068000 | 8.57352000  | 12.08254000 | #O  |
| 8.32947000 | 12.45558000 | 12.06478000 | #O  |
| 6.84253000 | 10.51003000 | 10.77834000 | #O  |
| 6.84429000 | 7.27983000  | 10.08416000 | #O  |
| 8.31795000 | 11.77157000 | 8.77067000  | #O  |
| 8.31467000 | 9.26793000  | 8.76389000  | #O  |
| 6.83167000 | 7.27897000  | 7.48063000  | #O  |
| 6.83459000 | 10.51903000 | 6.76670000  | #O  |
| 8.31393000 | 8.57963000  | 5.45142000  | #O  |
| 8.31886000 | 12.47237000 | 5.47359000  | #O  |
| 6.83674000 | 10.53023000 | 4.18915000  | #O  |
| 6.83413000 | 7.28518000  | 3.45543000  | #O  |
| 8.31408000 | 11.74451000 | 2.03450000  | #O  |
| 8.31206000 | 9.30502000  | 2.02374000  | #O  |
| 6.83466000 | 7.27773000  | 0.86703000  | #O  |
| 0.92736000 | 4.03918000  | 15.13248000 | #Ti |
| 2.40193000 | 0.76511000  | 15.54876000 | #Ti |
| 0.91778000 | 0.79001000  | 12.18952000 | #Ti |
| 2.43604000 | 4.03378000  | 12.00085000 | #Ti |
| 0.89555000 | 4.02288000  | 8.83021000  | #Ti |
| 2.25789000 | 0.78387000  | 8.77322000  | #Ti |
| 0.91657000 | 0.79406000  | 5.36308000  | #Ti |
| 2.39949000 | 4.04334000  | 5.60106000  | #Ti |
| 0.91609000 | 4.03411000  | 2.40005000  | #Ti |
| 2.38964000 | 0.78804000  | 1.99941000  | #Ti |
| 3.88639000 | 3.99153000  | 15.35349000 | #Ti |
| 5.36350000 | 0.75264000  | 15.52840000 | #Ti |
| 3.88095000 | 0.78758000  | 12.18866000 | #Ti |
| 5.35619000 | 4.04727000  | 12.18808000 | #Ti |
| 3.85961000 | 4.03384000  | 8.85662000  | #Ti |
| 5.21574000 | 0.78161000  | 8.77072000  | #Ti |
| 3.87319000 | 0.79303000  | 5.36137000  | #Ti |
| 5.35508000 | 4.04579000  | 5.60961000  | #Ti |
| 3.87499000 | 4.03399000  | 2.39953000  | #Ti |
| 5.34811000 | 0.78765000  | 1.99911000  | #Ti |
| 6.85001000 | 4.00513000  | 15.34030000 | #Ti |
| 8.32390000 | 0.76955000  | 15.54862000 | #Ti |
| 6.83794000 | 0.78650000  | 12.18988000 | #Ti |
| 8.28220000 | 4.04162000  | 11.99582000 | #Ti |
| 6.80621000 | 4.02915000  | 8.85651000  | #Ti |
| 8.17466000 | 0.78520000  | 8.77407000  | #Ti |
| 6.82568000 | 0.79185000  | 5.36171000  | #Ti |
| 8.31046000 | 4.03302000  | 5.60371000  | #Ti |
| 6.83369000 | 4.03368000  | 2.40063000  | #Ti |
| 8.30734000 | 0.78722000  | 2.00090000  | #Ti |
| 0.92351000 | 10.51507000 | 15.18577000 | #Ti |
| 2.40667000 | 7.26304000  | 15.61601000 | #Ti |
| 0.93887000 | 7.28341000  | 12.30332000 | #Ti |

|            |             |             |     |
|------------|-------------|-------------|-----|
| 2.39576000 | 10.54248000 | 11.98335000 | #Ti |
| 0.88360000 | 10.52517000 | 8.77850000  | #Ti |
| 2.29464000 | 7.26936000  | 8.67032000  | #Ti |
| 0.91003000 | 7.28725000  | 5.31508000  | #Ti |
| 2.39520000 | 10.53801000 | 5.56839000  | #Ti |
| 0.91611000 | 10.52725000 | 2.37475000  | #Ti |
| 2.38826000 | 7.27671000  | 1.95021000  | #Ti |
| 3.88153000 | 10.50160000 | 15.17406000 | #Ti |
| 5.27795000 | 7.26113000  | 15.27966000 | #Ti |
| 3.87180000 | 7.28993000  | 11.90857000 | #Ti |
| 5.35661000 | 10.53680000 | 11.97974000 | #Ti |
| 3.84086000 | 10.51909000 | 8.78064000  | #Ti |
| 5.35335000 | 7.27560000  | 8.61543000  | #Ti |
| 3.87269000 | 7.28673000  | 5.29287000  | #Ti |
| 5.35266000 | 10.53246000 | 5.56891000  | #Ti |
| 3.87477000 | 10.52866000 | 2.37375000  | #Ti |
| 5.35152000 | 7.27651000  | 1.94796000  | #Ti |
| 6.84169000 | 10.50462000 | 15.17520000 | #Ti |
| 8.27769000 | 7.26741000  | 15.64986000 | #Ti |
| 6.84693000 | 7.29370000  | 12.16833000 | #Ti |
| 8.31745000 | 10.53476000 | 11.98160000 | #Ti |
| 6.80225000 | 10.52561000 | 8.77847000  | #Ti |
| 8.28008000 | 7.27041000  | 8.89133000  | #Ti |
| 6.84146000 | 7.28501000  | 5.30908000  | #Ti |
| 8.31216000 | 10.54591000 | 5.57094000  | #Ti |
| 6.83371000 | 10.52739000 | 2.37538000  | #Ti |
| 8.31140000 | 7.27681000  | 1.95803000  | #Ti |

Rut-Gly-D4

1.000000000

|          |           |           |
|----------|-----------|-----------|
| 8.876100 | 0.000000  | 0.000000  |
| 0.000000 | 12.992946 | 0.000000  |
| 0.000000 | 0.000000  | 30.000000 |

H C N O Ti

5 2 1 122 60

Cartesian

|            |            |             |    |
|------------|------------|-------------|----|
| 6.26664000 | 4.54250000 | 19.93510000 | #H |
| 4.47569000 | 4.55602000 | 19.93944000 | #H |
| 6.20463000 | 6.66657000 | 18.77519000 | #H |
| 4.56612000 | 6.68005000 | 18.78153000 | #H |
| 6.81085000 | 1.32886000 | 17.50335000 | #H |
| 5.36470000 | 4.30624000 | 17.99334000 | #C |
| 5.37218000 | 4.88332000 | 19.39792000 | #C |
| 5.38464000 | 6.34120000 | 19.29385000 | #N |
| 6.49537000 | 4.11288000 | 17.41035000 | #O |
| 4.23279000 | 4.16712000 | 17.40329000 | #O |
| 0.91722000 | 0.79808000 | 16.65590000 | #O |
| 2.37483000 | 5.29051000 | 15.44548000 | #O |
| 2.38190000 | 2.81861000 | 15.50393000 | #O |
| 0.90589000 | 0.79144000 | 14.07351000 | #O |
| 0.92152000 | 4.02382000 | 13.33004000 | #O |
| 2.39725000 | 2.07098000 | 12.05450000 | #O |
| 2.39998000 | 6.00343000 | 12.06988000 | #O |
| 0.92093000 | 4.04216000 | 10.78381000 | #O |

|            |             |             |    |
|------------|-------------|-------------|----|
| 0.92004000 | 0.78020000  | 10.04871000 | #O |
| 2.40051000 | 5.28438000  | 8.77751000  | #O |
| 2.40354000 | 2.77365000  | 8.78262000  | #O |
| 0.92222000 | 0.79234000  | 7.45206000  | #O |
| 0.91928000 | 4.02424000  | 6.78172000  | #O |
| 2.40004000 | 2.07982000  | 5.44470000  | #O |
| 2.40077000 | 5.98612000  | 5.46811000  | #O |
| 0.91763000 | 4.03597000  | 4.20511000  | #O |
| 0.91995000 | 0.77999000  | 3.44515000  | #O |
| 2.39941000 | 5.25344000  | 2.05144000  | #O |
| 2.39913000 | 2.81170000  | 2.04046000  | #O |
| 0.91683000 | 0.79869000  | 0.85823000  | #O |
| 3.92984000 | 0.83503000  | 16.62526000 | #O |
| 5.36674000 | 5.31615000  | 15.26996000 | #O |
| 5.36588000 | 2.78672000  | 15.30830000 | #O |
| 3.84610000 | 0.75339000  | 14.09046000 | #O |
| 3.83836000 | 4.03131000  | 13.37824000 | #O |
| 5.36064000 | 2.06890000  | 12.10454000 | #O |
| 5.36315000 | 6.00355000  | 12.11017000 | #O |
| 3.90755000 | 4.03709000  | 10.80700000 | #O |
| 3.89157000 | 0.78134000  | 10.06549000 | #O |
| 5.35495000 | 5.28563000  | 8.77026000  | #O |
| 5.34995000 | 2.77340000  | 8.77442000  | #O |
| 3.87128000 | 0.78586000  | 7.45797000  | #O |
| 3.87473000 | 4.02656000  | 6.78194000  | #O |
| 5.35605000 | 2.07841000  | 5.45198000  | #O |
| 5.35874000 | 5.98546000  | 5.46731000  | #O |
| 3.87799000 | 4.03547000  | 4.20399000  | #O |
| 3.87840000 | 0.78062000  | 3.43918000  | #O |
| 5.35809000 | 5.25293000  | 2.04928000  | #O |
| 5.35827000 | 2.81059000  | 2.04032000  | #O |
| 3.87584000 | 0.79712000  | 0.85607000  | #O |
| 6.83417000 | 0.82103000  | 16.67574000 | #O |
| 8.35096000 | 5.28644000  | 15.45293000 | #O |
| 8.33768000 | 2.80876000  | 15.49277000 | #O |
| 6.85463000 | 0.73773000  | 14.06725000 | #O |
| 6.87933000 | 4.03029000  | 13.37415000 | #O |
| 8.32170000 | 2.07189000  | 12.06252000 | #O |
| 8.32368000 | 6.00351000  | 12.07586000 | #O |
| 6.80878000 | 4.03892000  | 10.80353000 | #O |
| 6.83346000 | 0.77943000  | 10.06000000 | #O |
| 8.31117000 | 5.28487000  | 8.77426000  | #O |
| 8.31033000 | 2.77857000  | 8.78545000  | #O |
| 6.83510000 | 0.78871000  | 7.47347000  | #O |
| 6.83611000 | 4.02527000  | 6.78398000  | #O |
| 8.31364000 | 2.07828000  | 5.44868000  | #O |
| 8.31873000 | 5.98469000  | 5.46839000  | #O |
| 6.83601000 | 4.03602000  | 4.20597000  | #O |
| 6.83362000 | 0.77894000  | 3.44546000  | #O |
| 8.31582000 | 5.25207000  | 2.05129000  | #O |
| 8.31574000 | 2.80985000  | 2.04572000  | #O |
| 6.83896000 | 0.79752000  | 0.85864000  | #O |
| 0.92732000 | 7.30533000  | 16.62717000 | #O |
| 2.39916000 | 11.76810000 | 15.53499000 | #O |
| 2.40851000 | 9.33545000  | 15.52416000 | #O |

|            |             |             |    |
|------------|-------------|-------------|----|
| 0.92416000 | 7.33692000  | 14.04846000 | #O |
| 0.92402000 | 10.53706000 | 13.35246000 | #O |
| 2.39942000 | 8.60219000  | 12.04013000 | #O |
| 2.39493000 | 12.48832000 | 12.06046000 | #O |
| 0.92088000 | 10.54723000 | 10.76463000 | #O |
| 0.92757000 | 7.28756000  | 10.06306000 | #O |
| 2.40031000 | 11.79452000 | 8.75728000  | #O |
| 2.40010000 | 9.28606000  | 8.76203000  | #O |
| 0.92628000 | 7.28439000  | 7.45980000  | #O |
| 0.91838000 | 10.54352000 | 6.75429000  | #O |
| 2.39957000 | 8.58876000  | 5.46251000  | #O |
| 2.39957000 | 12.48154000 | 5.44068000  | #O |
| 0.91707000 | 10.53194000 | 4.17535000  | #O |
| 0.91953000 | 7.28889000  | 3.47878000  | #O |
| 2.39837000 | 11.75617000 | 2.01016000  | #O |
| 2.39836000 | 9.31438000  | 2.01852000  | #O |
| 0.91910000 | 7.27500000  | 0.89779000  | #O |
| 3.90091000 | 7.26241000  | 16.60954000 | #O |
| 5.36898000 | 11.77879000 | 15.48774000 | #O |
| 5.36080000 | 9.34391000  | 15.52331000 | #O |
| 3.86418000 | 7.36759000  | 14.03254000 | #O |
| 3.87701000 | 10.53922000 | 13.34772000 | #O |
| 5.36186000 | 8.60101000  | 12.04104000 | #O |
| 5.36051000 | 12.48190000 | 12.06584000 | #O |
| 3.87796000 | 10.54967000 | 10.76720000 | #O |
| 3.89092000 | 7.28725000  | 10.06583000 | #O |
| 5.35368000 | 11.79352000 | 8.75512000  | #O |
| 5.35766000 | 9.28747000  | 8.76254000  | #O |
| 3.88715000 | 7.28805000  | 7.45789000  | #O |
| 3.87591000 | 10.53936000 | 6.75373000  | #O |
| 5.36032000 | 8.58899000  | 5.46080000  | #O |
| 5.35566000 | 12.48207000 | 5.44498000  | #O |
| 3.87749000 | 10.53182000 | 4.17378000  | #O |
| 3.88006000 | 7.28911000  | 3.47762000  | #O |
| 5.35611000 | 11.75494000 | 2.00539000  | #O |
| 5.35727000 | 9.31301000  | 2.02210000  | #O |
| 3.87674000 | 7.27529000  | 0.89489000  | #O |
| 6.82782000 | 7.26408000  | 16.61206000 | #O |
| 8.32312000 | 11.77913000 | 15.50091000 | #O |
| 8.32120000 | 9.34246000  | 15.53700000 | #O |
| 6.86203000 | 7.37062000  | 14.03801000 | #O |
| 6.84089000 | 10.53680000 | 13.34636000 | #O |
| 8.32557000 | 8.60090000  | 12.04237000 | #O |
| 8.32806000 | 12.48141000 | 12.06612000 | #O |
| 6.83790000 | 10.54871000 | 10.76498000 | #O |
| 6.84623000 | 7.28634000  | 10.06626000 | #O |
| 8.31581000 | 11.79075000 | 8.75774000  | #O |
| 8.31469000 | 9.28635000  | 8.75998000  | #O |
| 6.84473000 | 7.28777000  | 7.45952000  | #O |
| 6.83428000 | 10.54202000 | 6.75439000  | #O |
| 8.31691000 | 8.58908000  | 5.46353000  | #O |
| 8.31422000 | 12.48344000 | 5.44380000  | #O |
| 6.83649000 | 10.53407000 | 4.17451000  | #O |
| 6.84061000 | 7.28672000  | 3.47833000  | #O |
| 8.31632000 | 11.75510000 | 2.00951000  | #O |

|            |             |             |     |
|------------|-------------|-------------|-----|
| 8.31569000 | 9.31328000  | 2.02355000  | #O  |
| 6.83692000 | 7.27652000  | 0.89647000  | #O  |
| 0.92102000 | 4.04800000  | 15.12360000 | #Ti |
| 2.45552000 | 0.80414000  | 15.55861000 | #Ti |
| 0.94664000 | 0.79330000  | 12.15581000 | #Ti |
| 2.44692000 | 4.05228000  | 12.00719000 | #Ti |
| 0.89871000 | 4.03995000  | 8.84548000  | #Ti |
| 2.30773000 | 0.79722000  | 8.64174000  | #Ti |
| 0.91026000 | 0.78208000  | 5.30165000  | #Ti |
| 2.39774000 | 4.02547000  | 5.60295000  | #Ti |
| 0.91855000 | 4.03487000  | 2.39906000  | #Ti |
| 2.39437000 | 0.79308000  | 1.94068000  | #Ti |
| 3.87720000 | 4.06847000  | 15.41935000 | #Ti |
| 5.24711000 | 0.80947000  | 15.31291000 | #Ti |
| 3.88205000 | 0.78086000  | 11.89275000 | #Ti |
| 5.35492000 | 4.02715000  | 12.22777000 | #Ti |
| 3.86311000 | 4.03301000  | 8.86795000  | #Ti |
| 5.36067000 | 0.79177000  | 8.61938000  | #Ti |
| 3.87486000 | 0.78262000  | 5.28142000  | #Ti |
| 5.35389000 | 4.02409000  | 5.61117000  | #Ti |
| 3.87777000 | 4.03489000  | 2.39747000  | #Ti |
| 5.35683000 | 0.79238000  | 1.93566000  | #Ti |
| 6.83767000 | 4.04948000  | 15.39956000 | #Ti |
| 8.43525000 | 0.79905000  | 15.48743000 | #Ti |
| 6.84035000 | 0.78156000  | 12.20127000 | #Ti |
| 8.26996000 | 4.02675000  | 11.99803000 | #Ti |
| 6.80869000 | 4.04086000  | 8.86692000  | #Ti |
| 8.26326000 | 0.79689000  | 8.87570000  | #Ti |
| 6.83940000 | 0.78002000  | 5.29503000  | #Ti |
| 8.31047000 | 4.03191000  | 5.60548000  | #Ti |
| 6.83588000 | 4.03391000  | 2.39918000  | #Ti |
| 8.31645000 | 0.79261000  | 1.94723000  | #Ti |
| 0.92498000 | 10.53674000 | 15.16966000 | #Ti |
| 2.40402000 | 7.30303000  | 15.53102000 | #Ti |
| 0.90920000 | 7.28325000  | 12.17614000 | #Ti |
| 2.39431000 | 10.50842000 | 11.97106000 | #Ti |
| 0.88061000 | 10.53310000 | 8.76499000  | #Ti |
| 2.25776000 | 7.27797000  | 8.76264000  | #Ti |
| 0.91853000 | 7.27341000  | 5.34641000  | #Ti |
| 2.39403000 | 10.52495000 | 5.55560000  | #Ti |
| 0.91803000 | 10.53253000 | 2.36033000  | #Ti |
| 2.39709000 | 7.27800000  | 1.98344000  | #Ti |
| 3.88404000 | 10.55146000 | 15.16236000 | #Ti |
| 5.36702000 | 7.30734000  | 15.48388000 | #Ti |
| 3.88500000 | 7.28174000  | 12.16426000 | #Ti |
| 5.35523000 | 10.52686000 | 11.96574000 | #Ti |
| 3.83787000 | 10.53928000 | 8.76703000  | #Ti |
| 5.21762000 | 7.28295000  | 8.75502000  | #Ti |
| 3.87443000 | 7.27521000  | 5.34602000  | #Ti |
| 5.35147000 | 10.52362000 | 5.55583000  | #Ti |
| 3.87686000 | 10.53233000 | 2.35845000  | #Ti |
| 5.35461000 | 7.27742000  | 1.98110000  | #Ti |
| 6.84121000 | 10.56261000 | 15.16099000 | #Ti |
| 8.32611000 | 7.29923000  | 15.53238000 | #Ti |
| 6.83985000 | 7.28716000  | 12.16481000 | #Ti |

|            |             |             |     |
|------------|-------------|-------------|-----|
| 8.31490000 | 10.53770000 | 11.96625000 | #Ti |
| 6.79968000 | 10.53205000 | 8.76376000  | #Ti |
| 8.17762000 | 7.27792000  | 8.76089000  | #Ti |
| 6.82929000 | 7.27159000  | 5.34481000  | #Ti |
| 8.31088000 | 10.51425000 | 5.55648000  | #Ti |
| 6.83568000 | 10.53222000 | 2.35923000  | #Ti |
| 8.31418000 | 7.27717000  | 1.98432000  | #Ti |

Rut-Gly-D5

1.000000000

|          |           |           |
|----------|-----------|-----------|
| 8.876100 | 0.000000  | 0.000000  |
| 0.000000 | 12.992946 | 0.000000  |
| 0.000000 | 0.000000  | 30.000000 |

H C N O Ti

5 2 1 122 60

Cartesian

|            |            |             |    |
|------------|------------|-------------|----|
| 6.00579000 | 5.04430000 | 21.36345000 | #H |
| 7.63921000 | 5.04382000 | 21.36031000 | #H |
| 7.69459000 | 3.10772000 | 19.89418000 | #H |
| 5.94666000 | 3.10328000 | 19.90074000 | #H |
| 6.80497000 | 6.74219000 | 17.56527000 | #H |
| 6.81954000 | 3.77194000 | 19.98117000 | #C |
| 6.81088000 | 4.66828000 | 18.74243000 | #C |
| 6.82194000 | 4.43992000 | 21.26421000 | #N |
| 6.83236000 | 4.02230000 | 17.59032000 | #O |
| 6.78665000 | 5.90378000 | 18.83772000 | #O |
| 0.91219000 | 0.75078000 | 16.64295000 | #O |
| 2.39182000 | 5.22682000 | 15.52968000 | #O |
| 2.39380000 | 2.78416000 | 15.49955000 | #O |
| 0.92009000 | 0.73826000 | 14.06113000 | #O |
| 0.93839000 | 4.01579000 | 13.34345000 | #O |
| 2.39361000 | 2.05131000 | 12.06718000 | #O |
| 2.38957000 | 5.96580000 | 12.05876000 | #O |
| 0.88847000 | 4.00325000 | 10.77844000 | #O |
| 0.91955000 | 0.74850000 | 10.07187000 | #O |
| 2.39231000 | 5.26250000 | 8.77324000  | #O |
| 2.39119000 | 2.75337000 | 8.77309000  | #O |
| 0.91972000 | 0.74997000 | 7.46282000  | #O |
| 0.91261000 | 4.01478000 | 6.77360000  | #O |
| 2.39264000 | 2.05338000 | 5.46934000  | #O |
| 2.39268000 | 5.95583000 | 5.43790000  | #O |
| 0.90886000 | 3.99985000 | 4.19709000  | #O |
| 0.91152000 | 0.75002000 | 3.48464000  | #O |
| 2.38918000 | 5.22458000 | 2.02992000  | #O |
| 2.39060000 | 2.78302000 | 2.04457000  | #O |
| 0.91041000 | 0.75689000 | 0.90420000  | #O |
| 3.87308000 | 0.75245000 | 16.64145000 | #O |
| 5.33537000 | 5.24146000 | 15.48499000 | #O |
| 5.32206000 | 2.77491000 | 15.48436000 | #O |
| 3.86795000 | 0.74098000 | 14.05898000 | #O |
| 3.84723000 | 4.01318000 | 13.34270000 | #O |
| 5.34946000 | 2.04321000 | 12.09280000 | #O |
| 5.34657000 | 5.97105000 | 12.09058000 | #O |
| 3.89371000 | 4.00846000 | 10.78033000 | #O |

|            |             |             |    |
|------------|-------------|-------------|----|
| 3.87738000 | 0.74769000  | 10.07086000 | #O |
| 5.34825000 | 5.26267000  | 8.77252000  | #O |
| 5.35184000 | 2.75279000  | 8.77208000  | #O |
| 3.87918000 | 0.75159000  | 7.46263000  | #O |
| 3.86848000 | 4.01556000  | 6.77205000  | #O |
| 5.35232000 | 2.05367000  | 5.47089000  | #O |
| 5.34839000 | 5.95714000  | 5.44352000  | #O |
| 3.87105000 | 4.00008000  | 4.19425000  | #O |
| 3.87180000 | 0.74798000  | 3.48457000  | #O |
| 5.35022000 | 5.22551000  | 2.03086000  | #O |
| 5.34916000 | 2.78298000  | 2.04403000  | #O |
| 3.86953000 | 0.75520000  | 0.90439000  | #O |
| 6.83062000 | 0.77279000  | 16.63872000 | #O |
| 8.33301000 | 5.24353000  | 15.49351000 | #O |
| 8.34068000 | 2.77540000  | 15.48642000 | #O |
| 6.83217000 | 0.72757000  | 14.06349000 | #O |
| 6.83052000 | 4.01110000  | 13.38580000 | #O |
| 8.31598000 | 2.04261000  | 12.09645000 | #O |
| 8.31656000 | 5.97058000  | 12.09111000 | #O |
| 6.82988000 | 4.00479000  | 10.80888000 | #O |
| 6.83814000 | 0.74881000  | 10.07507000 | #O |
| 8.30155000 | 5.25728000  | 8.77156000  | #O |
| 8.30270000 | 2.75113000  | 8.77062000  | #O |
| 6.83962000 | 0.74839000  | 7.46299000  | #O |
| 6.82752000 | 4.01397000  | 6.77843000  | #O |
| 8.31081000 | 2.05458000  | 5.47268000  | #O |
| 8.30638000 | 5.95716000  | 5.44058000  | #O |
| 6.82966000 | 4.00082000  | 4.19846000  | #O |
| 6.83290000 | 0.75123000  | 3.48586000  | #O |
| 8.30763000 | 5.22451000  | 2.03528000  | #O |
| 8.30778000 | 2.78398000  | 2.04343000  | #O |
| 6.82901000 | 0.75540000  | 0.90516000  | #O |
| 0.90517000 | 7.24839000  | 16.66279000 | #O |
| 2.39598000 | 11.71846000 | 15.50647000 | #O |
| 2.38857000 | 9.27992000  | 15.53168000 | #O |
| 0.90700000 | 7.26048000  | 14.08061000 | #O |
| 0.91432000 | 10.49438000 | 13.35256000 | #O |
| 2.38971000 | 8.55009000  | 12.06612000 | #O |
| 2.39542000 | 12.43862000 | 12.06794000 | #O |
| 0.91045000 | 10.49644000 | 10.76898000 | #O |
| 0.91269000 | 7.25367000  | 10.04182000 | #O |
| 2.39040000 | 11.74343000 | 8.76057000  | #O |
| 2.39231000 | 9.23661000  | 8.76080000  | #O |
| 0.91436000 | 7.24829000  | 7.44531000  | #O |
| 0.90895000 | 10.48586000 | 6.75527000  | #O |
| 2.39157000 | 8.54728000  | 5.43683000  | #O |
| 2.39206000 | 12.44107000 | 5.46432000  | #O |
| 0.91064000 | 10.49544000 | 4.17624000  | #O |
| 0.91227000 | 7.25387000  | 3.44073000  | #O |
| 2.39031000 | 11.71444000 | 2.02499000  | #O |
| 2.39057000 | 9.27332000  | 2.00843000  | #O |
| 0.90841000 | 7.24395000  | 0.85300000  | #O |
| 3.90138000 | 7.25236000  | 16.65406000 | #O |
| 5.35044000 | 11.71108000 | 15.51916000 | #O |
| 5.35730000 | 9.27386000  | 15.50332000 | #O |

|            |             |             |     |
|------------|-------------|-------------|-----|
| 3.85843000 | 7.26182000  | 14.11262000 | #O  |
| 3.86901000 | 10.49429000 | 13.35215000 | #O  |
| 5.34967000 | 8.55510000  | 12.06888000 | #O  |
| 5.35061000 | 12.43966000 | 12.07231000 | #O  |
| 3.86978000 | 10.49420000 | 10.76946000 | #O  |
| 3.87989000 | 7.25388000  | 10.06668000 | #O  |
| 5.34835000 | 11.74409000 | 8.76163000  | #O  |
| 5.34491000 | 9.23791000  | 8.76114000  | #O  |
| 3.86485000 | 7.24915000  | 7.45511000  | #O  |
| 3.86848000 | 10.48650000 | 6.75372000  | #O  |
| 5.34890000 | 8.54695000  | 5.44101000  | #O  |
| 5.35230000 | 12.44098000 | 5.46261000  | #O  |
| 3.86996000 | 10.49587000 | 4.17595000  | #O  |
| 3.87097000 | 7.25546000  | 3.43532000  | #O  |
| 5.34957000 | 11.71516000 | 2.02605000  | #O  |
| 5.34795000 | 9.27442000  | 2.00633000  | #O  |
| 3.86906000 | 7.24223000  | 0.85208000  | #O  |
| 6.83411000 | 7.24434000  | 16.66827000 | #O  |
| 8.30992000 | 11.71258000 | 15.51824000 | #O  |
| 8.31303000 | 9.27538000  | 15.50823000 | #O  |
| 6.83039000 | 7.28657000  | 14.07372000 | #O  |
| 6.82975000 | 10.49521000 | 13.35143000 | #O  |
| 8.31527000 | 8.55394000  | 12.07038000 | #O  |
| 8.31367000 | 12.43966000 | 12.07546000 | #O  |
| 6.82968000 | 10.49590000 | 10.77059000 | #O  |
| 6.82533000 | 7.25324000  | 10.06075000 | #O  |
| 8.30701000 | 11.74379000 | 8.76257000  | #O  |
| 8.30597000 | 9.24140000  | 8.76309000  | #O  |
| 6.82349000 | 7.25009000  | 7.47032000  | #O  |
| 6.82842000 | 10.48663000 | 6.75621000  | #O  |
| 8.30662000 | 8.54635000  | 5.43821000  | #O  |
| 8.31025000 | 12.43904000 | 5.46371000  | #O  |
| 6.82799000 | 10.49490000 | 4.17572000  | #O  |
| 6.82695000 | 7.25622000  | 3.44315000  | #O  |
| 8.30810000 | 11.71399000 | 2.02762000  | #O  |
| 8.30796000 | 9.27405000  | 2.00906000  | #O  |
| 6.83272000 | 7.24297000  | 0.85664000  | #O  |
| 0.90886000 | 4.00733000  | 15.14767000 | #Ti |
| 2.39087000 | 0.77123000  | 15.55474000 | #Ti |
| 0.89999000 | 0.75750000  | 12.19165000 | #Ti |
| 2.38919000 | 3.98980000  | 11.89945000 | #Ti |
| 0.87535000 | 3.99781000  | 8.82638000  | #Ti |
| 2.24555000 | 0.75874000  | 8.77014000  | #Ti |
| 0.91067000 | 0.76167000  | 5.35576000  | #Ti |
| 2.38782000 | 4.01223000  | 5.58581000  | #Ti |
| 0.91067000 | 4.00168000  | 2.38831000  | #Ti |
| 2.38843000 | 0.75731000  | 1.99009000  | #Ti |
| 3.87608000 | 4.00356000  | 15.14585000 | #Ti |
| 5.35006000 | 0.75100000  | 15.55049000 | #Ti |
| 3.87353000 | 0.76576000  | 12.19321000 | #Ti |
| 5.41433000 | 4.00721000  | 12.12780000 | #Ti |
| 3.84688000 | 4.00581000  | 8.82861000  | #Ti |
| 5.20281000 | 0.75442000  | 8.76972000  | #Ti |
| 3.86565000 | 0.76123000  | 5.35374000  | #Ti |
| 5.34785000 | 4.01258000  | 5.59533000  | #Ti |



|            |             |             |     |
|------------|-------------|-------------|-----|
| 3.87027000 | 4.00267000  | 2.38564000  | #Ti |
| 5.34780000 | 0.75690000  | 1.98981000  | #Ti |
| 6.83069000 | 4.00446000  | 15.70003000 | #Ti |
| 8.31043000 | 0.75349000  | 15.54882000 | #Ti |
| 6.82982000 | 0.74736000  | 12.19610000 | #Ti |
| 8.24211000 | 4.01056000  | 12.12404000 | #Ti |
| 6.79932000 | 3.99906000  | 8.84844000  | #Ti |
| 8.16183000 | 0.75405000  | 8.77195000  | #Ti |
| 6.82014000 | 0.76162000  | 5.35524000  | #Ti |
| 8.30244000 | 4.00137000  | 5.59779000  | #Ti |
| 6.82871000 | 4.00206000  | 2.38951000  | #Ti |
| 8.30664000 | 0.75705000  | 1.99231000  | #Ti |
| 0.91837000 | 10.50944000 | 15.16876000 | #Ti |
| 2.44363000 | 7.24154000  | 15.55936000 | #Ti |
| 0.93384000 | 7.24656000  | 12.20404000 | #Ti |
| 2.38622000 | 10.51995000 | 11.97425000 | #Ti |
| 0.87079000 | 10.49792000 | 8.76490000  | #Ti |
| 2.28900000 | 7.23933000  | 8.64558000  | #Ti |
| 0.90165000 | 7.25446000  | 5.30119000  | #Ti |
| 2.38612000 | 10.50314000 | 5.55616000  | #Ti |
| 0.91067000 | 10.49607000 | 2.36091000  | #Ti |
| 2.38683000 | 7.24577000  | 1.93545000  | #Ti |
| 3.86921000 | 10.50182000 | 15.16776000 | #Ti |
| 5.24266000 | 7.25691000  | 15.38234000 | #Ti |
| 3.86889000 | 7.25338000  | 11.89302000 | #Ti |
| 5.34467000 | 10.50217000 | 11.97306000 | #Ti |
| 3.82612000 | 10.48991000 | 8.76878000  | #Ti |
| 5.35030000 | 7.24629000  | 8.61441000  | #Ti |
| 3.86629000 | 7.25515000  | 5.27914000  | #Ti |
| 5.34398000 | 10.50211000 | 5.55731000  | #Ti |
| 3.86951000 | 10.49720000 | 2.36017000  | #Ti |
| 5.35019000 | 7.24627000  | 1.93193000  | #Ti |
| 6.83075000 | 10.48952000 | 15.16605000 | #Ti |
| 8.39178000 | 7.26317000  | 15.53691000 | #Ti |
| 6.82421000 | 7.25487000  | 12.22448000 | #Ti |
| 8.30594000 | 10.48702000 | 11.97054000 | #Ti |
| 6.78668000 | 10.50034000 | 8.76645000  | #Ti |
| 8.25242000 | 7.24714000  | 8.88990000  | #Ti |
| 6.83358000 | 7.25421000  | 5.29402000  | #Ti |
| 8.30284000 | 10.51328000 | 5.55628000  | #Ti |
| 6.82824000 | 10.49573000 | 2.36079000  | #Ti |
| 8.31040000 | 7.24555000  | 1.94499000  | #Ti |

Rut-Gly-C

1.000000000

8.876100 0.000000 0.000000

0.000000 12.992946 0.000000

0.000000 0.000000 30.000000

H C N O Ti

5 2 1 122 60

Cartesian

5.97461000 3.33702000 17.86151000 #H

7.57908000 3.15846000 17.83028000 #H

7.90186000 5.56681000 18.22078000 #H

|            |            |             |    |
|------------|------------|-------------|----|
| 6.16910000 | 5.73682000 | 18.27486000 | #H |
| 6.98958000 | 3.45791000 | 21.32002000 | #H |
| 6.98129000 | 5.03141000 | 18.49110000 | #C |
| 7.01227000 | 4.81037000 | 19.99438000 | #C |
| 6.83774000 | 3.83922000 | 17.63468000 | #N |
| 7.08355000 | 5.71667000 | 20.80096000 | #O |
| 6.95823000 | 3.49187000 | 20.33999000 | #O |
| 0.91426000 | 0.84011000 | 16.63504000 | #O |
| 2.39847000 | 5.30173000 | 15.50932000 | #O |
| 2.39918000 | 2.86088000 | 15.50250000 | #O |
| 0.92782000 | 0.80809000 | 14.05420000 | #O |
| 0.93864000 | 4.08170000 | 13.33434000 | #O |
| 2.40025000 | 2.12070000 | 12.06099000 | #O |
| 2.39885000 | 6.02171000 | 12.05987000 | #O |
| 0.89286000 | 4.06944000 | 10.77538000 | #O |
| 0.92439000 | 0.80988000 | 10.07521000 | #O |
| 2.39560000 | 5.31372000 | 8.77325000  | #O |
| 2.39566000 | 2.80880000 | 8.78153000  | #O |
| 0.92269000 | 0.81343000 | 7.46242000  | #O |
| 0.91678000 | 4.05011000 | 6.77241000  | #O |
| 2.39741000 | 2.09955000 | 5.45906000  | #O |
| 2.39767000 | 5.99656000 | 5.46938000  | #O |
| 0.91651000 | 4.05005000 | 4.19737000  | #O |
| 0.91698000 | 0.78487000 | 3.47577000  | #O |
| 2.39676000 | 5.25716000 | 2.03143000  | #O |
| 2.39793000 | 2.81867000 | 2.04698000  | #O |
| 0.91783000 | 0.79765000 | 0.89334000  | #O |
| 3.88364000 | 0.84130000 | 16.63745000 | #O |
| 5.34008000 | 5.30210000 | 15.51954000 | #O |
| 5.31887000 | 2.84135000 | 15.44839000 | #O |
| 3.87097000 | 0.80772000 | 14.05462000 | #O |
| 3.85812000 | 4.08255000 | 13.33500000 | #O |
| 5.35704000 | 2.11648000 | 12.08271000 | #O |
| 5.35573000 | 6.02222000 | 12.07852000 | #O |
| 3.89959000 | 4.06770000 | 10.77579000 | #O |
| 3.88625000 | 0.80943000 | 10.07539000 | #O |
| 5.35615000 | 5.31412000 | 8.76747000  | #O |
| 5.35610000 | 2.80714000 | 8.77598000  | #O |
| 3.88180000 | 0.81318000 | 7.46210000  | #O |
| 3.87403000 | 4.04572000 | 6.77177000  | #O |
| 5.35723000 | 2.10027000 | 5.45895000  | #O |
| 5.35578000 | 5.99690000 | 5.47016000  | #O |
| 3.87635000 | 4.05114000 | 4.19702000  | #O |
| 3.87762000 | 0.78498000 | 3.47685000  | #O |
| 5.35659000 | 5.25774000 | 2.03362000  | #O |
| 5.35647000 | 2.81807000 | 2.04633000  | #O |
| 3.87666000 | 0.79735000 | 0.89257000  | #O |
| 6.83915000 | 0.88188000 | 16.62674000 | #O |
| 8.33180000 | 5.30205000 | 15.51304000 | #O |
| 8.35668000 | 2.84128000 | 15.44642000 | #O |
| 6.83869000 | 0.79744000 | 14.05102000 | #O |
| 6.83557000 | 4.07609000 | 13.38855000 | #O |
| 8.31954000 | 2.11668000 | 12.08492000 | #O |
| 8.31874000 | 6.02254000 | 12.07931000 | #O |
| 6.83477000 | 4.06622000 | 10.79560000 | #O |

|            |             |             |    |
|------------|-------------|-------------|----|
| 6.84527000 | 0.81203000  | 10.07893000 | #O |
| 8.30778000 | 5.31375000  | 8.76929000  | #O |
| 8.30811000 | 2.80755000  | 8.77355000  | #O |
| 6.84170000 | 0.81046000  | 7.46217000  | #O |
| 6.83286000 | 4.04871000  | 6.77452000  | #O |
| 8.31460000 | 2.10083000  | 5.46061000  | #O |
| 8.31589000 | 5.99782000  | 5.46876000  | #O |
| 6.83491000 | 4.05167000  | 4.19792000  | #O |
| 6.83730000 | 0.78239000  | 3.47706000  | #O |
| 8.31479000 | 5.25708000  | 2.03498000  | #O |
| 8.31429000 | 2.81750000  | 2.04876000  | #O |
| 6.83573000 | 0.79743000  | 0.89396000  | #O |
| 0.90950000 | 7.32557000  | 16.63282000 | #O |
| 2.39875000 | 11.79534000 | 15.51668000 | #O |
| 2.39797000 | 9.35737000  | 15.50497000 | #O |
| 0.92265000 | 7.32888000  | 14.05300000 | #O |
| 0.91876000 | 10.57106000 | 13.34833000 | #O |
| 2.40018000 | 8.62301000  | 12.06502000 | #O |
| 2.39970000 | 12.51110000 | 12.06804000 | #O |
| 0.91653000 | 10.56728000 | 10.76994000 | #O |
| 0.92509000 | 7.31488000  | 10.07405000 | #O |
| 2.39578000 | 11.81014000 | 8.76155000  | #O |
| 2.39515000 | 9.30527000  | 8.76842000  | #O |
| 0.92161000 | 7.30838000  | 7.46271000  | #O |
| 0.91547000 | 10.54602000 | 6.76051000  | #O |
| 2.39751000 | 8.59758000  | 5.45785000  | #O |
| 2.39760000 | 12.49072000 | 5.46813000  | #O |
| 0.91706000 | 10.54583000 | 4.18511000  | #O |
| 0.91825000 | 7.28695000  | 3.47521000  | #O |
| 2.39793000 | 11.75468000 | 2.02262000  | #O |
| 2.39748000 | 9.31548000  | 2.02922000  | #O |
| 0.91756000 | 7.28784000  | 0.89298000  | #O |
| 3.88291000 | 7.32940000  | 16.63251000 | #O |
| 5.35884000 | 11.79559000 | 15.51557000 | #O |
| 5.35478000 | 9.36151000  | 15.50064000 | #O |
| 3.87720000 | 7.32758000  | 14.05127000 | #O |
| 3.87559000 | 10.57106000 | 13.34875000 | #O |
| 5.35659000 | 8.62267000  | 12.06475000 | #O |
| 5.35555000 | 12.50911000 | 12.07020000 | #O |
| 3.87508000 | 10.56637000 | 10.77051000 | #O |
| 3.88692000 | 7.31494000  | 10.07453000 | #O |
| 5.35361000 | 11.80878000 | 8.76174000  | #O |
| 5.35423000 | 9.30432000  | 8.76991000  | #O |
| 3.88103000 | 7.30836000  | 7.46218000  | #O |
| 3.87436000 | 10.54282000 | 6.76069000  | #O |
| 5.35662000 | 8.59845000  | 5.45642000  | #O |
| 5.35550000 | 12.49091000 | 5.46708000  | #O |
| 3.87442000 | 10.54532000 | 4.18446000  | #O |
| 3.87679000 | 7.28688000  | 3.47566000  | #O |
| 5.35493000 | 11.75434000 | 2.02109000  | #O |
| 5.35653000 | 9.31430000  | 2.03260000  | #O |
| 3.87698000 | 7.28364000  | 0.89187000  | #O |
| 6.83411000 | 7.35087000  | 16.60604000 | #O |
| 8.31518000 | 11.79470000 | 15.51318000 | #O |
| 8.31831000 | 9.36202000  | 15.50003000 | #O |

|            |             |             |     |
|------------|-------------|-------------|-----|
| 6.83869000 | 7.32862000  | 14.04366000 | #O  |
| 6.83531000 | 10.56953000 | 13.34836000 | #O  |
| 8.31955000 | 8.62294000  | 12.06562000 | #O  |
| 8.31873000 | 12.50943000 | 12.07045000 | #O  |
| 6.83381000 | 10.56636000 | 10.77103000 | #O  |
| 6.84445000 | 7.31085000  | 10.07576000 | #O  |
| 8.31130000 | 11.80882000 | 8.76239000  | #O  |
| 8.31067000 | 9.30515000  | 8.77051000  | #O  |
| 6.84113000 | 7.31021000  | 7.46143000  | #O  |
| 6.83260000 | 10.54538000 | 6.76081000  | #O  |
| 8.31457000 | 8.59963000  | 5.45689000  | #O  |
| 8.31653000 | 12.49122000 | 5.46494000  | #O  |
| 6.83348000 | 10.54823000 | 4.18432000  | #O  |
| 6.83764000 | 7.28486000  | 3.47621000  | #O  |
| 8.31532000 | 11.75362000 | 2.02182000  | #O  |
| 8.31495000 | 9.31524000  | 2.03549000  | #O  |
| 6.83616000 | 7.28802000  | 0.89364000  | #O  |
| 0.92455000 | 4.07910000  | 15.13693000 | #Ti |
| 2.39806000 | 0.83362000  | 15.54908000 | #Ti |
| 0.91330000 | 0.80691000  | 12.17634000 | #Ti |
| 2.39105000 | 4.05037000  | 11.91072000 | #Ti |
| 0.86127000 | 4.06065000  | 8.79680000  | #Ti |
| 2.24571000 | 0.81656000  | 8.76484000  | #Ti |
| 0.91197000 | 0.78957000  | 5.34398000  | #Ti |
| 2.39031000 | 4.03485000  | 5.57792000  | #Ti |
| 0.91703000 | 4.03926000  | 2.38477000  | #Ti |
| 2.39599000 | 0.79218000  | 1.98009000  | #Ti |
| 3.86935000 | 4.08021000  | 15.13741000 | #Ti |
| 5.35352000 | 0.82260000  | 15.52916000 | #Ti |
| 3.86958000 | 0.80621000  | 12.17798000 | #Ti |
| 5.38365000 | 4.04643000  | 12.04707000 | #Ti |
| 3.83051000 | 4.06196000  | 8.79237000  | #Ti |
| 5.20429000 | 0.81281000  | 8.76349000  | #Ti |
| 3.87043000 | 0.78913000  | 5.34301000  | #Ti |
| 5.35091000 | 4.03398000  | 5.58202000  | #Ti |
| 3.87603000 | 4.04029000  | 2.38410000  | #Ti |
| 5.35524000 | 0.79210000  | 1.97945000  | #Ti |
| 6.83508000 | 4.08316000  | 15.35575000 | #Ti |
| 8.32007000 | 0.82211000  | 15.52408000 | #Ti |
| 6.82983000 | 0.79576000  | 12.17350000 | #Ti |
| 8.27200000 | 4.04746000  | 12.05357000 | #Ti |
| 6.78408000 | 4.05940000  | 8.80518000  | #Ti |
| 8.16418000 | 0.81192000  | 8.76423000  | #Ti |
| 6.82973000 | 0.78802000  | 5.34430000  | #Ti |
| 8.30757000 | 4.03483000  | 5.58361000  | #Ti |
| 6.83509000 | 4.03942000  | 2.38591000  | #Ti |
| 8.31410000 | 0.79164000  | 1.98156000  | #Ti |
| 0.92254000 | 10.57801000 | 15.16146000 | #Ti |
| 2.39327000 | 7.32074000  | 15.54899000 | #Ti |
| 0.91281000 | 7.30001000  | 12.17079000 | #Ti |
| 2.39084000 | 10.54822000 | 11.96836000 | #Ti |
| 0.86247000 | 10.55729000 | 8.76525000  | #Ti |
| 2.24736000 | 7.30665000  | 8.76255000  | #Ti |
| 0.91233000 | 7.28496000  | 5.34232000  | #Ti |
| 2.39021000 | 10.53127000 | 5.56202000  | #Ti |

|            |             |             |     |
|------------|-------------|-------------|-----|
| 0.91751000 | 10.53634000 | 2.36945000  | #Ti |
| 2.39616000 | 7.28469000  | 1.97847000  | #Ti |
| 3.87258000 | 10.57756000 | 15.16228000 | #Ti |
| 5.34614000 | 7.34447000  | 15.51775000 | #Ti |
| 3.86929000 | 7.29962000  | 12.16925000 | #Ti |
| 5.34851000 | 10.54440000 | 11.96678000 | #Ti |
| 3.82109000 | 10.55851000 | 8.76523000  | #Ti |
| 5.20684000 | 7.30871000  | 8.76083000  | #Ti |
| 3.87084000 | 7.28412000  | 5.34178000  | #Ti |
| 5.34844000 | 10.53078000 | 5.56209000  | #Ti |
| 3.87581000 | 10.53624000 | 2.36854000  | #Ti |
| 5.35507000 | 7.28451000  | 1.97866000  | #Ti |
| 6.83596000 | 10.58011000 | 15.15927000 | #Ti |
| 8.31629000 | 7.34508000  | 15.51737000 | #Ti |
| 6.82909000 | 7.30068000  | 12.16569000 | #Ti |
| 8.30958000 | 10.54464000 | 11.96758000 | #Ti |
| 6.77966000 | 10.55635000 | 8.76528000  | #Ti |
| 8.16591000 | 7.30805000  | 8.76143000  | #Ti |
| 6.82988000 | 7.28363000  | 5.34241000  | #Ti |
| 8.30764000 | 10.53130000 | 5.56139000  | #Ti |
| 6.83468000 | 10.53653000 | 2.36956000  | #Ti |
| 8.31401000 | 7.28489000  | 1.98096000  | #Ti |

Rut-Leu-Z

1.000000000

11.834800 0.000000 0.000000

0.000000 12.992946 0.000000

0.000000 0.000000 30.000000

H C N O Ti

13 6 1 162 80

Cartesian

|            |            |             |    |
|------------|------------|-------------|----|
| 7.41374000 | 3.69658000 | 20.63688000 | #H |
| 7.34638000 | 5.36647000 | 21.15181000 | #H |
| 5.19832000 | 4.75118000 | 21.15972000 | #H |
| 5.25442000 | 5.93680000 | 18.33260000 | #H |
| 3.92447000 | 5.98783000 | 19.47777000 | #H |
| 5.39733000 | 6.88806000 | 19.83693000 | #H |
| 5.30038000 | 2.52896000 | 20.08227000 | #H |
| 3.88063000 | 3.45370000 | 19.56603000 | #H |
| 5.26547000 | 3.27073000 | 18.47480000 | #H |
| 9.12853000 | 4.95326000 | 19.63262000 | #H |
| 8.86779000 | 6.79229000 | 18.11539000 | #H |
| 7.23397000 | 6.74246000 | 18.12575000 | #H |
| 8.02988000 | 7.16483000 | 19.57303000 | #H |
| 7.10839000 | 4.70161000 | 20.30159000 | #C |
| 5.56538000 | 4.70814000 | 20.11855000 | #C |
| 5.01965000 | 5.94804000 | 19.40401000 | #C |
| 4.97955000 | 3.41869000 | 19.52097000 | #C |
| 8.11350000 | 4.33384000 | 17.87583000 | #C |
| 8.12340000 | 5.08460000 | 19.21006000 | #C |
| 8.05612000 | 6.53204000 | 18.76840000 | #N |
| 9.25444000 | 4.10352000 | 17.36385000 | #O |
| 6.98660000 | 4.15032000 | 17.32588000 | #O |
| 3.68159000 | 0.78130000 | 16.60862000 | #O |

|             |            |             |    |
|-------------|------------|-------------|----|
| 5.12693000  | 5.27517000 | 15.42768000 | #O |
| 5.12869000  | 2.81043000 | 15.44398000 | #O |
| 3.68254000  | 0.78380000 | 14.02348000 | #O |
| 3.66835000  | 4.04666000 | 13.30096000 | #O |
| 5.15959000  | 2.08902000 | 12.03726000 | #O |
| 5.16528000  | 6.00763000 | 12.04137000 | #O |
| 3.69282000  | 4.04749000 | 10.74018000 | #O |
| 3.68854000  | 0.78280000 | 10.03845000 | #O |
| 5.16939000  | 5.29675000 | 8.74281000  | #O |
| 5.16485000  | 2.78779000 | 8.75197000  | #O |
| 3.69544000  | 0.78879000 | 7.43235000  | #O |
| 3.68506000  | 4.03774000 | 6.74602000  | #O |
| 5.16595000  | 2.08756000 | 5.43752000  | #O |
| 5.16737000  | 5.98708000 | 5.43513000  | #O |
| 3.68658000  | 4.03337000 | 4.17286000  | #O |
| 3.68704000  | 0.77371000 | 3.45949000  | #O |
| 5.16706000  | 5.24632000 | 2.00932000  | #O |
| 5.16679000  | 2.80618000 | 2.02257000  | #O |
| 3.68576000  | 0.77966000 | 0.87844000  | #O |
| 6.64649000  | 0.82963000 | 16.58781000 | #O |
| 8.12673000  | 5.29318000 | 15.22400000 | #O |
| 8.11426000  | 2.77025000 | 15.25059000 | #O |
| 6.62073000  | 0.73570000 | 14.00953000 | #O |
| 6.60590000  | 4.04034000 | 13.33070000 | #O |
| 8.12171000  | 2.08563000 | 12.06758000 | #O |
| 8.12680000  | 6.00954000 | 12.07781000 | #O |
| 6.66518000  | 4.05058000 | 10.77001000 | #O |
| 6.65025000  | 0.78729000 | 10.03973000 | #O |
| 8.11833000  | 5.29922000 | 8.74940000  | #O |
| 8.11999000  | 2.78658000 | 8.74951000  | #O |
| 6.65121000  | 0.79029000 | 7.43269000  | #O |
| 6.64251000  | 4.03978000 | 6.75407000  | #O |
| 8.12471000  | 2.08608000 | 5.43584000  | #O |
| 8.12306000  | 5.98744000 | 5.43991000  | #O |
| 6.64567000  | 4.03616000 | 4.17614000  | #O |
| 6.64404000  | 0.77056000 | 3.45692000  | #O |
| 8.12421000  | 5.24618000 | 2.00779000  | #O |
| 8.12486000  | 2.80590000 | 2.02594000  | #O |
| 6.64543000  | 0.78742000 | 0.87765000  | #O |
| 9.58558000  | 0.83110000 | 16.58572000 | #O |
| 11.10100000 | 5.27396000 | 15.43144000 | #O |
| 11.10753000 | 2.80655000 | 15.43245000 | #O |
| 9.62075000  | 0.73564000 | 14.00911000 | #O |
| 9.63520000  | 4.03484000 | 13.33287000 | #O |
| 11.08755000 | 2.08817000 | 12.04037000 | #O |
| 11.08798000 | 6.00712000 | 12.06429000 | #O |
| 9.57951000  | 4.05196000 | 10.77065000 | #O |
| 9.60891000  | 0.78528000 | 10.04146000 | #O |
| 11.07577000 | 5.29401000 | 8.74287000  | #O |
| 11.07284000 | 2.78713000 | 8.75055000  | #O |
| 9.60956000  | 0.78758000 | 7.43391000  | #O |
| 9.60019000  | 4.03717000 | 6.75622000  | #O |
| 11.08145000 | 2.08792000 | 5.43821000  | #O |
| 11.07858000 | 5.98867000 | 5.44627000  | #O |
| 9.60258000  | 4.03575000 | 4.17734000  | #O |

|             |             |             |    |
|-------------|-------------|-------------|----|
| 9.60518000  | 0.77269000  | 3.45800000  | #O |
| 11.08384000 | 5.24637000  | 2.01374000  | #O |
| 11.08245000 | 2.80661000  | 2.02327000  | #O |
| 9.60349000  | 0.78079000  | 0.87729000  | #O |
| 3.68815000  | 7.29076000  | 16.62750000 | #O |
| 5.16172000  | 11.75021000 | 15.48973000 | #O |
| 5.15924000  | 9.31949000  | 15.50614000 | #O |
| 3.68036000  | 7.30938000  | 14.04189000 | #O |
| 3.68549000  | 10.53348000 | 13.32626000 | #O |
| 5.15947000  | 8.59487000  | 12.02497000 | #O |
| 5.15722000  | 12.48104000 | 12.02343000 | #O |
| 3.67871000  | 10.53699000 | 10.74382000 | #O |
| 3.69057000  | 7.28612000  | 10.02082000 | #O |
| 5.16627000  | 11.78159000 | 8.74098000  | #O |
| 5.16386000  | 9.27373000  | 8.73861000  | #O |
| 3.68371000  | 7.28429000  | 7.42511000  | #O |
| 3.68448000  | 10.52537000 | 6.73818000  | #O |
| 5.16477000  | 8.58166000  | 5.42302000  | #O |
| 5.16670000  | 12.47537000 | 5.44585000  | #O |
| 3.68611000  | 10.52900000 | 4.16133000  | #O |
| 3.68814000  | 7.27548000  | 3.43954000  | #O |
| 5.16745000  | 11.73756000 | 1.99821000  | #O |
| 5.16576000  | 9.29820000  | 2.00258000  | #O |
| 3.68167000  | 7.26964000  | 0.85862000  | #O |
| 6.66762000  | 7.23244000  | 16.59054000 | #O |
| 8.11741000  | 11.74453000 | 15.49371000 | #O |
| 8.11807000  | 9.31367000  | 15.48623000 | #O |
| 6.62973000  | 7.35637000  | 14.02664000 | #O |
| 6.64135000  | 10.53772000 | 13.31780000 | #O |
| 8.12809000  | 8.59699000  | 12.02855000 | #O |
| 8.12352000  | 12.48234000 | 12.02177000 | #O |
| 6.64049000  | 10.53392000 | 10.74315000 | #O |
| 6.65947000  | 7.28959000  | 10.04837000 | #O |
| 8.11871000  | 11.78339000 | 8.74015000  | #O |
| 8.12304000  | 9.27549000  | 8.74950000  | #O |
| 6.65004000  | 7.29330000  | 7.42879000  | #O |
| 6.64448000  | 10.52243000 | 6.73656000  | #O |
| 8.12474000  | 8.58307000  | 5.42468000  | #O |
| 8.12380000  | 12.47592000 | 5.44199000  | #O |
| 6.64306000  | 10.53132000 | 4.16015000  | #O |
| 6.64777000  | 7.27887000  | 3.43238000  | #O |
| 8.12386000  | 11.73808000 | 1.99994000  | #O |
| 8.12569000  | 9.29898000  | 2.00088000  | #O |
| 6.64417000  | 7.27504000  | 0.84742000  | #O |
| 9.54536000  | 7.22801000  | 16.64139000 | #O |
| 11.07590000 | 11.75028000 | 15.49252000 | #O |
| 11.07404000 | 9.31678000  | 15.51535000 | #O |
| 9.62626000  | 7.35543000  | 14.04026000 | #O |
| 9.60037000  | 10.53624000 | 13.32246000 | #O |
| 11.09407000 | 8.59564000  | 12.04953000 | #O |
| 11.09049000 | 12.48071000 | 12.02584000 | #O |
| 9.60496000  | 10.53386000 | 10.74459000 | #O |
| 9.62692000  | 7.28720000  | 10.06619000 | #O |
| 11.08228000 | 11.78230000 | 8.73975000  | #O |
| 11.07747000 | 9.27661000  | 8.73771000  | #O |

|             |             |             |     |
|-------------|-------------|-------------|-----|
| 9.59415000  | 7.28761000  | 7.45874000  | #O  |
| 9.59898000  | 10.52633000 | 6.73886000  | #O  |
| 11.07629000 | 8.58089000  | 5.43360000  | #O  |
| 11.08420000 | 12.47561000 | 5.44661000  | #O  |
| 9.60410000  | 10.52807000 | 4.16065000  | #O  |
| 9.59948000  | 7.27755000  | 3.43959000  | #O  |
| 11.08496000 | 11.73758000 | 1.99861000  | #O  |
| 11.08374000 | 9.29830000  | 2.00740000  | #O  |
| 9.61106000  | 7.26876000  | 0.85753000  | #O  |
| 0.71811000  | 0.78731000  | 16.60846000 | #O  |
| 2.19895000  | 5.26869000  | 15.48303000 | #O  |
| 2.19894000  | 2.82103000  | 15.46988000 | #O  |
| 0.73045000  | 0.77996000  | 14.02553000 | #O  |
| 0.74152000  | 4.04564000  | 13.30221000 | #O  |
| 2.20535000  | 2.09162000  | 12.03260000 | #O  |
| 2.20612000  | 6.00266000  | 12.03877000 | #O  |
| 0.71276000  | 4.04623000  | 10.74091000 | #O  |
| 0.73148000  | 0.78855000  | 10.03738000 | #O  |
| 2.20115000  | 5.29095000  | 8.74408000  | #O  |
| 2.20434000  | 2.78553000  | 8.74417000  | #O  |
| 0.73146000  | 0.79338000  | 7.43290000  | #O  |
| 0.72630000  | 4.03742000  | 6.74704000  | #O  |
| 2.20768000  | 2.08705000  | 5.43567000  | #O  |
| 2.20626000  | 5.98507000  | 5.43935000  | #O  |
| 0.72459000  | 4.03756000  | 4.17520000  | #O  |
| 0.72689000  | 0.77183000  | 3.45952000  | #O  |
| 2.20618000  | 5.24453000  | 2.00938000  | #O  |
| 2.20716000  | 2.80547000  | 2.02415000  | #O  |
| 0.72821000  | 0.78706000  | 0.87928000  | #O  |
| 0.69787000  | 7.28657000  | 16.65446000 | #O  |
| 2.19909000  | 11.75499000 | 15.47754000 | #O  |
| 2.19932000  | 9.31841000  | 15.50245000 | #O  |
| 0.75064000  | 7.30983000  | 14.06092000 | #O  |
| 0.72303000  | 10.53896000 | 13.32848000 | #O  |
| 2.20661000  | 8.59533000  | 12.04382000 | #O  |
| 2.20487000  | 12.48223000 | 12.03827000 | #O  |
| 0.72546000  | 10.53161000 | 10.74406000 | #O  |
| 0.71964000  | 7.28903000  | 10.02763000 | #O  |
| 2.20115000  | 11.78512000 | 8.73629000  | #O  |
| 2.20582000  | 9.28047000  | 8.74334000  | #O  |
| 0.73172000  | 7.29059000  | 7.43781000  | #O  |
| 0.72587000  | 10.52370000 | 6.73768000  | #O  |
| 2.20755000  | 8.58328000  | 5.42727000  | #O  |
| 2.20602000  | 12.47685000 | 5.44632000  | #O  |
| 0.72513000  | 10.52936000 | 4.16384000  | #O  |
| 0.72650000  | 7.27637000  | 3.44946000  | #O  |
| 2.20609000  | 11.73791000 | 2.00211000  | #O  |
| 2.20818000  | 9.29870000  | 2.00760000  | #O  |
| 0.73105000  | 7.27568000  | 0.86275000  | #O  |
| 3.67530000  | 4.05227000  | 15.10541000 | #Ti |
| 5.15167000  | 0.77978000  | 15.50983000 | #Ti |
| 3.66995000  | 0.81880000  | 12.15384000 | #Ti |
| 5.20297000  | 4.06901000  | 11.97762000 | #Ti |
| 3.64745000  | 4.02994000  | 8.76539000  | #Ti |
| 5.02067000  | 0.79245000  | 8.74145000  | #Ti |



|             |             |             |     |
|-------------|-------------|-------------|-----|
| 3.68127000  | 0.81761000  | 5.33122000  | #Ti |
| 5.16932000  | 4.06428000  | 5.56418000  | #Ti |
| 3.68699000  | 4.02456000  | 2.36341000  | #Ti |
| 5.16571000  | 0.77768000  | 1.96636000  | #Ti |
| 6.63614000  | 4.01175000  | 15.28847000 | #Ti |
| 8.11399000  | 0.77031000  | 15.48354000 | #Ti |
| 6.63753000  | 0.82891000  | 12.14807000 | #Ti |
| 8.11986000  | 4.09532000  | 12.12401000 | #Ti |
| 6.60757000  | 4.04660000  | 8.81544000  | #Ti |
| 7.97766000  | 0.79061000  | 8.73513000  | #Ti |
| 6.64195000  | 0.81032000  | 5.32684000  | #Ti |
| 8.12016000  | 4.06713000  | 5.57686000  | #Ti |
| 6.64584000  | 4.02510000  | 2.36672000  | #Ti |
| 8.12434000  | 0.77820000  | 1.96557000  | #Ti |
| 9.59694000  | 4.01405000  | 15.30643000 | #Ti |
| 11.07597000 | 0.78115000  | 15.50917000 | #Ti |
| 9.59722000  | 0.83068000  | 12.14671000 | #Ti |
| 11.03095000 | 4.07614000  | 11.98723000 | #Ti |
| 9.55562000  | 4.03095000  | 8.81914000  | #Ti |
| 10.93929000 | 0.79188000  | 8.73994000  | #Ti |
| 9.59281000  | 0.80992000  | 5.32903000  | #Ti |
| 11.07072000 | 4.06074000  | 5.56859000  | #Ti |
| 9.60348000  | 4.02642000  | 2.36775000  | #Ti |
| 11.08271000 | 0.77827000  | 1.96646000  | #Ti |
| 3.67543000  | 10.53923000 | 15.14187000 | #Ti |
| 5.15588000  | 7.28759000  | 15.51560000 | #Ti |
| 3.68895000  | 7.31399000  | 12.20045000 | #Ti |
| 5.15566000  | 10.58551000 | 11.94414000 | #Ti |
| 3.63420000  | 10.54828000 | 8.74598000  | #Ti |
| 5.00535000  | 7.28144000  | 8.71673000  | #Ti |
| 3.68203000  | 7.31150000  | 5.30409000  | #Ti |
| 5.16065000  | 10.56655000 | 5.54118000  | #Ti |
| 3.68648000  | 10.52123000 | 2.34734000  | #Ti |
| 5.16169000  | 7.26921000  | 1.93544000  | #Ti |
| 6.63813000  | 10.52369000 | 15.13112000 | #Ti |
| 8.04907000  | 7.27719000  | 15.25067000 | #Ti |
| 6.63129000  | 7.32987000  | 11.92456000 | #Ti |
| 8.11723000  | 10.58547000 | 11.94112000 | #Ti |
| 6.59215000  | 10.51486000 | 8.74579000  | #Ti |
| 8.05332000  | 7.28525000  | 8.60422000  | #Ti |
| 6.63744000  | 7.30466000  | 5.28247000  | #Ti |
| 8.11893000  | 10.55280000 | 5.53829000  | #Ti |
| 6.64503000  | 10.52013000 | 2.34602000  | #Ti |
| 8.12645000  | 7.27016000  | 1.92828000  | #Ti |
| 9.59887000  | 10.52181000 | 15.13629000 | #Ti |
| 11.00277000 | 7.28225000  | 15.58277000 | #Ti |
| 9.60906000  | 7.33868000  | 12.08499000 | #Ti |
| 11.07829000 | 10.58462000 | 11.94775000 | #Ti |
| 9.55338000  | 10.54873000 | 8.74735000  | #Ti |
| 11.00664000 | 7.28160000  | 8.78892000  | #Ti |
| 9.60423000  | 7.30292000  | 5.28630000  | #Ti |
| 11.07697000 | 10.57014000 | 5.54334000  | #Ti |
| 9.60435000  | 10.52181000 | 2.34664000  | #Ti |
| 11.09427000 | 7.26931000  | 1.95111000  | #Ti |
| 0.72060000  | 4.05102000  | 15.10619000 | #Ti |

|            |             |             |     |
|------------|-------------|-------------|-----|
| 2.19610000 | 0.81300000  | 15.52106000 | #Ti |
| 0.72676000 | 0.82088000  | 12.15682000 | #Ti |
| 2.20025000 | 4.08392000  | 11.90583000 | #Ti |
| 0.68176000 | 4.03905000  | 8.77037000  | #Ti |
| 2.06028000 | 0.79296000  | 8.74031000  | #Ti |
| 0.72303000 | 0.81870000  | 5.32958000  | #Ti |
| 2.20199000 | 4.07401000  | 5.55135000  | #Ti |
| 0.72712000 | 4.02429000  | 2.36525000  | #Ti |
| 2.20735000 | 0.77749000  | 1.96777000  | #Ti |
| 0.72329000 | 10.53665000 | 15.14416000 | #Ti |
| 2.16948000 | 7.28597000  | 15.57729000 | #Ti |
| 0.72477000 | 7.31237000  | 12.23299000 | #Ti |
| 2.19849000 | 10.55434000 | 11.94628000 | #Ti |
| 0.67797000 | 10.51915000 | 8.74560000  | #Ti |
| 2.08412000 | 7.28090000  | 8.74483000  | #Ti |
| 0.71977000 | 7.31276000  | 5.33044000  | #Ti |
| 2.20164000 | 10.56788000 | 5.54018000  | #Ti |
| 0.72776000 | 10.51971000 | 2.34962000  | #Ti |
| 2.20610000 | 7.26860000  | 1.96001000  | #Ti |

Rut-Leu-D

1.000000000

11.834800 0.000000 0.000000

0.000000 12.992946 0.000000

0.000000 0.000000 30.000000

H C N O Ti

13 6 1 162 80

Cartesian

|            |            |             |    |
|------------|------------|-------------|----|
| 7.26475000 | 3.49678000 | 20.60415000 | #H |
| 7.28774000 | 5.13230000 | 21.22978000 | #H |
| 5.09638000 | 4.73010000 | 21.10836000 | #H |
| 5.41866000 | 5.94976000 | 18.31594000 | #H |
| 3.98407000 | 6.02383000 | 19.33454000 | #H |
| 5.45813000 | 6.85265000 | 19.85205000 | #H |
| 5.06524000 | 2.51909000 | 20.06288000 | #H |
| 3.78458000 | 3.53982000 | 19.38977000 | #H |
| 5.24863000 | 3.21446000 | 18.44440000 | #H |
| 9.09818000 | 4.65308000 | 19.74363000 | #H |
| 9.30853000 | 6.93016000 | 17.57504000 | #H |
| 7.40415000 | 6.79776000 | 18.64502000 | #H |
| 8.51280000 | 6.92114000 | 19.86789000 | #H |
| 7.04569000 | 4.54239000 | 20.32823000 | #C |
| 5.51268000 | 4.66607000 | 20.08678000 | #C |
| 5.07974000 | 5.94390000 | 19.35882000 | #C |
| 4.87654000 | 3.41638000 | 19.45528000 | #C |
| 8.11331000 | 4.34645000 | 17.91592000 | #C |
| 8.13519000 | 4.96467000 | 19.31052000 | #C |
| 8.28088000 | 6.41605000 | 19.01177000 | #N |
| 9.24915000 | 4.14664000 | 17.36097000 | #O |
| 6.99429000 | 4.18709000 | 17.33144000 | #O |
| 3.68611000 | 0.80635000 | 16.59999000 | #O |
| 5.12991000 | 5.30602000 | 15.42074000 | #O |
| 5.13362000 | 2.83715000 | 15.44701000 | #O |
| 3.68237000 | 0.80502000 | 14.01592000 | #O |

|             |            |             |    |
|-------------|------------|-------------|----|
| 3.66658000  | 4.05888000 | 13.30186000 | #O |
| 5.15889000  | 2.09694000 | 12.02612000 | #O |
| 5.16344000  | 6.01908000 | 12.04715000 | #O |
| 3.69491000  | 4.06764000 | 10.74088000 | #O |
| 3.68817000  | 0.78498000 | 10.03064000 | #O |
| 5.17077000  | 5.30381000 | 8.73831000  | #O |
| 5.16381000  | 2.79446000 | 8.75461000  | #O |
| 3.69744000  | 0.79623000 | 7.42323000  | #O |
| 3.68374000  | 4.03753000 | 6.74322000  | #O |
| 5.16473000  | 2.08803000 | 5.42885000  | #O |
| 5.16525000  | 5.98855000 | 5.43146000  | #O |
| 3.68613000  | 4.03862000 | 4.16777000  | #O |
| 3.68909000  | 0.77111000 | 3.44993000  | #O |
| 5.16671000  | 5.24649000 | 1.99912000  | #O |
| 5.16544000  | 2.80638000 | 2.02301000  | #O |
| 3.68391000  | 0.78290000 | 0.86920000  | #O |
| 6.65139000  | 0.85073000 | 16.57970000 | #O |
| 8.13310000  | 5.32560000 | 15.21258000 | #O |
| 8.12040000  | 2.79999000 | 15.26362000 | #O |
| 6.62252000  | 0.75917000 | 14.00344000 | #O |
| 6.60578000  | 4.05004000 | 13.33874000 | #O |
| 8.12263000  | 2.09448000 | 12.06351000 | #O |
| 8.12341000  | 6.02252000 | 12.08289000 | #O |
| 6.66543000  | 4.06344000 | 10.77481000 | #O |
| 6.64971000  | 0.79200000 | 10.03405000 | #O |
| 8.11626000  | 5.30539000 | 8.74423000  | #O |
| 8.11998000  | 2.79345000 | 8.75232000  | #O |
| 6.65017000  | 0.79909000 | 7.42725000  | #O |
| 6.64124000  | 4.03985000 | 6.75276000  | #O |
| 8.12489000  | 2.08551000 | 5.43024000  | #O |
| 8.12245000  | 5.98816000 | 5.43709000  | #O |
| 6.64495000  | 4.03899000 | 4.17353000  | #O |
| 6.64582000  | 0.77207000 | 3.44922000  | #O |
| 8.12339000  | 5.24652000 | 2.00268000  | #O |
| 8.12423000  | 2.80638000 | 2.02381000  | #O |
| 6.64359000  | 0.79053000 | 0.86884000  | #O |
| 9.59028000  | 0.84604000 | 16.58125000 | #O |
| 11.11211000 | 5.30510000 | 15.42654000 | #O |
| 11.10959000 | 2.83380000 | 15.44605000 | #O |
| 9.62247000  | 0.75593000 | 14.00540000 | #O |
| 9.63965000  | 4.04764000 | 13.33807000 | #O |
| 11.08773000 | 2.09499000 | 12.02626000 | #O |
| 11.08606000 | 6.01858000 | 12.05928000 | #O |
| 9.57615000  | 4.06414000 | 10.77361000 | #O |
| 9.60923000  | 0.78810000 | 10.03589000 | #O |
| 11.07553000 | 5.30195000 | 8.73664000  | #O |
| 11.07394000 | 2.79465000 | 8.75458000  | #O |
| 9.61035000  | 0.79370000 | 7.42833000  | #O |
| 9.60046000  | 4.03722000 | 6.75550000  | #O |
| 11.07988000 | 2.08771000 | 5.43113000  | #O |
| 11.07996000 | 5.98899000 | 5.44123000  | #O |
| 9.60245000  | 4.04015000 | 4.17524000  | #O |
| 9.60671000  | 0.77161000 | 3.45053000  | #O |
| 11.08301000 | 5.24669000 | 2.00491000  | #O |
| 11.08122000 | 2.80658000 | 2.02175000  | #O |

|             |             |             |    |
|-------------|-------------|-------------|----|
| 9.60214000  | 0.78258000  | 0.86882000  | #O |
| 3.69391000  | 7.32464000  | 16.62111000 | #O |
| 5.16437000  | 11.77460000 | 15.48075000 | #O |
| 5.16331000  | 9.34369000  | 15.49842000 | #O |
| 3.66167000  | 7.33204000  | 14.04207000 | #O |
| 3.68813000  | 10.54128000 | 13.31822000 | #O |
| 5.15974000  | 8.60411000  | 12.01957000 | #O |
| 5.15749000  | 12.48902000 | 12.02167000 | #O |
| 3.67970000  | 10.54677000 | 10.73595000 | #O |
| 3.69860000  | 7.29321000  | 10.03282000 | #O |
| 5.16692000  | 11.78663000 | 8.72690000  | #O |
| 5.16353000  | 9.27798000  | 8.73502000  | #O |
| 3.67407000  | 7.28972000  | 7.43100000  | #O |
| 3.68485000  | 10.52416000 | 6.72736000  | #O |
| 5.16172000  | 8.57976000  | 5.41556000  | #O |
| 5.16792000  | 12.47316000 | 5.43598000  | #O |
| 3.68525000  | 10.52670000 | 4.14957000  | #O |
| 3.68742000  | 7.27253000  | 3.42824000  | #O |
| 5.16669000  | 11.73891000 | 1.99013000  | #O |
| 5.16483000  | 9.29788000  | 1.99212000  | #O |
| 3.68190000  | 7.27148000  | 0.84788000  | #O |
| 6.68270000  | 7.27201000  | 16.56206000 | #O |
| 8.12315000  | 11.76662000 | 15.48195000 | #O |
| 8.12230000  | 9.33268000  | 15.46725000 | #O |
| 6.61321000  | 7.37436000  | 14.02162000 | #O |
| 6.64089000  | 10.55242000 | 13.31364000 | #O |
| 8.12404000  | 8.60774000  | 12.01954000 | #O |
| 8.12235000  | 12.49042000 | 12.02049000 | #O |
| 6.64060000  | 10.54357000 | 10.73633000 | #O |
| 6.65311000  | 7.29215000  | 10.03853000 | #O |
| 8.11788000  | 11.78981000 | 8.72763000  | #O |
| 8.12207000  | 9.28136000  | 8.74415000  | #O |
| 6.64541000  | 7.29859000  | 7.42314000  | #O |
| 6.64336000  | 10.51834000 | 6.72654000  | #O |
| 8.12524000  | 8.58150000  | 5.41738000  | #O |
| 8.12251000  | 12.47470000 | 5.43493000  | #O |
| 6.64340000  | 10.52740000 | 4.14958000  | #O |
| 6.64710000  | 7.27962000  | 3.42342000  | #O |
| 8.12220000  | 11.73937000 | 1.99194000  | #O |
| 8.12437000  | 9.29825000  | 1.99047000  | #O |
| 6.64482000  | 7.27063000  | 0.83692000  | #O |
| 9.56806000  | 7.25435000  | 16.65148000 | #O |
| 11.07939000 | 11.76883000 | 15.48287000 | #O |
| 11.08145000 | 9.33207000  | 15.49697000 | #O |
| 9.62645000  | 7.38396000  | 14.03656000 | #O |
| 9.60282000  | 10.54612000 | 13.31476000 | #O |
| 11.09284000 | 8.60821000  | 12.02951000 | #O |
| 11.09058000 | 12.48940000 | 12.02710000 | #O |
| 9.60354000  | 10.55058000 | 10.73696000 | #O |
| 9.61696000  | 7.29277000  | 10.05431000 | #O |
| 11.08310000 | 11.78768000 | 8.72603000  | #O |
| 11.07742000 | 9.28219000  | 8.73656000  | #O |
| 9.59520000  | 7.29316000  | 7.45431000  | #O |
| 9.59886000  | 10.52486000 | 6.72943000  | #O |
| 11.07551000 | 8.57978000  | 5.42294000  | #O |

|             |             |             |     |
|-------------|-------------|-------------|-----|
| 11.08476000 | 12.47350000 | 5.43969000  | #O  |
| 9.60321000  | 10.52593000 | 4.15014000  | #O  |
| 9.59971000  | 7.27280000  | 3.42998000  | #O  |
| 11.08379000 | 11.73915000 | 1.99134000  | #O  |
| 11.08196000 | 9.29881000  | 1.99479000  | #O  |
| 9.60903000  | 7.26808000  | 0.84827000  | #O  |
| 0.72257000  | 0.80103000  | 16.59801000 | #O  |
| 2.20045000  | 5.29499000  | 15.47375000 | #O  |
| 2.20345000  | 2.84595000  | 15.47377000 | #O  |
| 0.73206000  | 0.80603000  | 14.01549000 | #O  |
| 0.74181000  | 4.05022000  | 13.30130000 | #O  |
| 2.20646000  | 2.10117000  | 12.01588000 | #O  |
| 2.20214000  | 6.01595000  | 12.04764000 | #O  |
| 0.71294000  | 4.06695000  | 10.74021000 | #O  |
| 0.73344000  | 0.78816000  | 10.03132000 | #O  |
| 2.20225000  | 5.29938000  | 8.73468000  | #O  |
| 2.20505000  | 2.79335000  | 8.74901000  | #O  |
| 0.73126000  | 0.80296000  | 7.42726000  | #O  |
| 0.72709000  | 4.03583000  | 6.74428000  | #O  |
| 2.20869000  | 2.08716000  | 5.42683000  | #O  |
| 2.20553000  | 5.98586000  | 5.43211000  | #O  |
| 0.72337000  | 4.03873000  | 4.17085000  | #O  |
| 0.72740000  | 0.77279000  | 3.45215000  | #O  |
| 2.20405000  | 5.24658000  | 2.00300000  | #O  |
| 2.20656000  | 2.80653000  | 2.01990000  | #O  |
| 0.72666000  | 0.78935000  | 0.87068000  | #O  |
| 0.71755000  | 7.31204000  | 16.63061000 | #O  |
| 2.20500000  | 11.77829000 | 15.46339000 | #O  |
| 2.20107000  | 9.33913000  | 15.48817000 | #O  |
| 0.70760000  | 7.32765000  | 14.05372000 | #O  |
| 0.72510000  | 10.55208000 | 13.31873000 | #O  |
| 2.20177000  | 8.60229000  | 12.03765000 | #O  |
| 2.20640000  | 12.49003000 | 12.03724000 | #O  |
| 0.72835000  | 10.54441000 | 10.73542000 | #O  |
| 0.72178000  | 7.29488000  | 10.03497000 | #O  |
| 2.20206000  | 11.79135000 | 8.71969000  | #O  |
| 2.20683000  | 9.28611000  | 8.73919000  | #O  |
| 0.73879000  | 7.29672000  | 7.42888000  | #O  |
| 0.72555000  | 10.51895000 | 6.72743000  | #O  |
| 2.20908000  | 8.58290000  | 5.41825000  | #O  |
| 2.20539000  | 12.47585000 | 5.43804000  | #O  |
| 0.72474000  | 10.52812000 | 4.15271000  | #O  |
| 0.72583000  | 7.28013000  | 3.43746000  | #O  |
| 2.20431000  | 11.73927000 | 1.99276000  | #O  |
| 2.20664000  | 9.29931000  | 1.99479000  | #O  |
| 0.72894000  | 7.27450000  | 0.84880000  | #O  |
| 3.68048000  | 4.07987000  | 15.10487000 | #Ti |
| 5.15806000  | 0.80495000  | 15.50443000 | #Ti |
| 3.67839000  | 0.80181000  | 12.14706000 | #Ti |
| 5.21179000  | 4.04733000  | 11.98629000 | #Ti |
| 3.65141000  | 4.03333000  | 8.76669000  | #Ti |
| 5.02136000  | 0.79833000  | 8.73161000  | #Ti |
| 3.67913000  | 0.80652000  | 5.32168000  | #Ti |
| 5.17020000  | 4.04804000  | 5.56401000  | #Ti |
| 3.68547000  | 4.02747000  | 2.35875000  | #Ti |

|             |             |             |     |
|-------------|-------------|-------------|-----|
| 5.16103000  | 0.77957000  | 1.95702000  | #Ti |
| 6.64097000  | 4.03455000  | 15.33319000 | #Ti |
| 8.12172000  | 0.80103000  | 15.47737000 | #Ti |
| 6.64162000  | 0.81123000  | 12.14159000 | #Ti |
| 8.12215000  | 4.06146000  | 12.15768000 | #Ti |
| 6.61167000  | 4.05590000  | 8.82767000  | #Ti |
| 7.97674000  | 0.79752000  | 8.73009000  | #Ti |
| 6.64292000  | 0.80135000  | 5.31633000  | #Ti |
| 8.11973000  | 4.05736000  | 5.57943000  | #Ti |
| 6.64464000  | 4.02492000  | 2.36411000  | #Ti |
| 8.12037000  | 0.77979000  | 1.95473000  | #Ti |
| 9.59754000  | 4.06491000  | 15.35845000 | #Ti |
| 11.07821000 | 0.80789000  | 15.50360000 | #Ti |
| 9.59972000  | 0.80334000  | 12.13879000 | #Ti |
| 11.02319000 | 4.04599000  | 11.99292000 | #Ti |
| 9.55756000  | 4.03531000  | 8.82996000  | #Ti |
| 10.93933000 | 0.79942000  | 8.73083000  | #Ti |
| 9.59168000  | 0.80098000  | 5.31807000  | #Ti |
| 11.06937000 | 4.04489000  | 5.56854000  | #Ti |
| 9.60228000  | 4.02783000  | 2.36575000  | #Ti |
| 11.07980000 | 0.77947000  | 1.95695000  | #Ti |
| 3.68075000  | 10.55486000 | 15.13344000 | #Ti |
| 5.17657000  | 7.31515000  | 15.49938000 | #Ti |
| 3.69174000  | 7.29689000  | 12.16244000 | #Ti |
| 5.15761000  | 10.56140000 | 11.93680000 | #Ti |
| 3.63328000  | 10.56041000 | 8.73533000  | #Ti |
| 5.00532000  | 7.28557000  | 8.71935000  | #Ti |
| 3.68355000  | 7.29924000  | 5.28339000  | #Ti |
| 5.15978000  | 10.55607000 | 5.52923000  | #Ti |
| 3.68514000  | 10.52187000 | 2.33509000  | #Ti |
| 5.16361000  | 7.26814000  | 1.92230000  | #Ti |
| 6.64325000  | 10.56048000 | 15.12651000 | #Ti |
| 8.00683000  | 7.30503000  | 15.25458000 | #Ti |
| 6.63986000  | 7.31181000  | 11.89575000 | #Ti |
| 8.11830000  | 10.55928000 | 11.93368000 | #Ti |
| 6.59128000  | 10.51434000 | 8.73480000  | #Ti |
| 8.06235000  | 7.29108000  | 8.58356000  | #Ti |
| 6.63527000  | 7.29432000  | 5.27583000  | #Ti |
| 8.11798000  | 10.53884000 | 5.52807000  | #Ti |
| 6.64392000  | 10.51982000 | 2.33482000  | #Ti |
| 8.12478000  | 7.26836000  | 1.92029000  | #Ti |
| 9.60177000  | 10.53438000 | 15.12883000 | #Ti |
| 11.14125000 | 7.30895000  | 15.51231000 | #Ti |
| 9.60410000  | 7.31047000  | 12.15181000 | #Ti |
| 11.07945000 | 10.54491000 | 11.93757000 | #Ti |
| 9.55253000  | 10.56236000 | 8.73647000  | #Ti |
| 10.98494000 | 7.28807000  | 8.82286000  | #Ti |
| 9.60545000  | 7.29210000  | 5.27612000  | #Ti |
| 11.07631000 | 10.56043000 | 5.53227000  | #Ti |
| 9.60266000  | 10.52200000 | 2.33538000  | #Ti |
| 11.09128000 | 7.26861000  | 1.93790000  | #Ti |
| 0.72517000  | 4.05578000  | 15.10371000 | #Ti |
| 2.20234000  | 0.83441000  | 15.51453000 | #Ti |
| 0.71863000  | 0.79631000  | 12.14933000 | #Ti |
| 2.20097000  | 4.03727000  | 11.89979000 | #Ti |

|            |             |             |     |
|------------|-------------|-------------|-----|
| 0.68331000 | 4.05276000  | 8.77123000  | #Ti |
| 2.06034000 | 0.80061000  | 8.73542000  | #Ti |
| 0.72527000 | 0.80839000  | 5.32061000  | #Ti |
| 2.20169000 | 4.06426000  | 5.54726000  | #Ti |
| 0.72544000 | 4.02418000  | 2.36110000  | #Ti |
| 2.20411000 | 0.77928000  | 1.95838000  | #Ti |
| 0.72839000 | 10.57106000 | 15.13374000 | #Ti |
| 2.24086000 | 7.30685000  | 15.53209000 | #Ti |
| 0.73332000 | 7.28991000  | 12.16182000 | #Ti |
| 2.20021000 | 10.54431000 | 11.93827000 | #Ti |
| 0.67703000 | 10.51932000 | 8.73466000  | #Ti |
| 2.08076000 | 7.28603000  | 8.69783000  | #Ti |
| 0.71638000 | 7.30257000  | 5.31413000  | #Ti |
| 2.20116000 | 10.55020000 | 5.52934000  | #Ti |
| 0.72617000 | 10.52009000 | 2.33806000  | #Ti |
| 2.20328000 | 7.26868000  | 1.94238000  | #Ti |

Rut-Leu-C

1.000000000

11.834800 0.000000 0.000000

0.000000 12.992946 0.000000

0.000000 0.000000 30.000000

H C N O Ti

13 6 1 162 80

Cartesian

|             |            |             |    |
|-------------|------------|-------------|----|
| 1.65460000  | 5.47506000 | 19.81468000 | #H |
| 1.66119000  | 5.85305000 | 18.10031000 | #H |
| 0.50262000  | 3.79025000 | 17.53201000 | #H |
| 0.60299000  | 3.03982000 | 20.50015000 | #H |
| 11.45462000 | 2.22734000 | 19.25747000 | #H |
| 1.37466000  | 2.13735000 | 19.17552000 | #H |
| 11.04774000 | 5.84421000 | 18.33428000 | #H |
| 10.17272000 | 4.31235000 | 18.56893000 | #H |
| 10.96850000 | 5.09881000 | 19.94428000 | #H |
| 2.66616000  | 2.73041000 | 17.61391000 | #H |
| 4.23775000  | 3.02217000 | 17.69095000 | #H |
| 3.83926000  | 5.25043000 | 18.60454000 | #H |
| 4.37835000  | 2.22547000 | 20.78790000 | #H |
| 1.72460000  | 5.02504000 | 18.81268000 | #C |
| 0.51469000  | 4.09784000 | 18.60275000 | #C |
| 0.53819000  | 2.80576000 | 19.42712000 | #C |
| 11.06168000 | 4.88673000 | 18.86794000 | #C |
| 3.13313000  | 4.41120000 | 18.72355000 | #C |
| 3.52426000  | 3.75657000 | 20.05840000 | #C |
| 3.34094000  | 3.50193000 | 17.56869000 | #N |
| 3.33202000  | 4.26125000 | 21.14826000 | #O |
| 4.15317000  | 2.55824000 | 19.89389000 | #O |
| 9.29422000  | 0.63061000 | 16.60170000 | #O |
| 10.76496000 | 5.10755000 | 15.44918000 | #O |
| 10.76222000 | 2.65976000 | 15.46044000 | #O |
| 9.30163000  | 0.62837000 | 14.01914000 | #O |
| 9.29636000  | 3.87790000 | 13.29621000 | #O |
| 10.78093000 | 1.92371000 | 12.02349000 | #O |
| 10.77822000 | 5.82483000 | 12.02368000 | #O |

|             |             |             |    |
|-------------|-------------|-------------|----|
| 9.29606000  | 3.87481000  | 10.72666000 | #O |
| 9.30399000  | 0.62360000  | 10.03579000 | #O |
| 10.77890000 | 5.12442000  | 8.74059000  | #O |
| 10.77919000 | 2.61921000  | 8.74165000  | #O |
| 9.30839000  | 0.62154000  | 7.42751000  | #O |
| 9.30127000  | 3.86604000  | 6.73255000  | #O |
| 10.78116000 | 1.91610000  | 5.43026000  | #O |
| 10.78136000 | 5.81117000  | 5.42853000  | #O |
| 9.29895000  | 3.86358000  | 4.16052000  | #O |
| 9.30205000  | 0.61146000  | 3.44768000  | #O |
| 10.78338000 | 5.08404000  | 2.00954000  | #O |
| 10.78276000 | 2.64468000  | 2.00441000  | #O |
| 9.30316000  | 0.61613000  | 0.86662000  | #O |
| 0.42875000  | 0.65425000  | 16.58343000 | #O |
| 1.87483000  | 5.11023000  | 15.45630000 | #O |
| 1.86595000  | 2.63993000  | 15.36692000 | #O |
| 0.41234000  | 0.60319000  | 14.00347000 | #O |
| 0.40132000  | 3.88569000  | 13.30709000 | #O |
| 1.90312000  | 1.91890000  | 12.04573000 | #O |
| 1.90366000  | 5.82729000  | 12.04135000 | #O |
| 0.44318000  | 3.87317000  | 10.74797000 | #O |
| 0.43501000  | 0.62047000  | 10.03683000 | #O |
| 1.90430000  | 5.12541000  | 8.73791000  | #O |
| 1.90386000  | 2.61767000  | 8.73776000  | #O |
| 0.42760000  | 0.62212000  | 7.42717000  | #O |
| 0.42108000  | 3.86533000  | 6.74066000  | #O |
| 1.90618000  | 1.91484000  | 5.43592000  | #O |
| 1.90482000  | 5.81266000  | 5.43250000  | #O |
| 0.42890000  | 3.86304000  | 4.16476000  | #O |
| 0.42828000  | 0.61244000  | 3.44661000  | #O |
| 1.90631000  | 5.08192000  | 2.00873000  | #O |
| 1.90657000  | 2.64306000  | 2.00890000  | #O |
| 0.42583000  | 0.61630000  | 0.86576000  | #O |
| 3.36647000  | 0.68174000  | 16.57341000 | #O |
| 4.88051000  | 5.10117000  | 15.49628000 | #O |
| 4.89519000  | 2.64308000  | 15.40316000 | #O |
| 3.38915000  | 0.59193000  | 14.00061000 | #O |
| 3.38500000  | 3.88753000  | 13.35237000 | #O |
| 4.86630000  | 1.92162000  | 12.04410000 | #O |
| 4.86645000  | 5.82925000  | 12.03837000 | #O |
| 3.37840000  | 3.87177000  | 10.76333000 | #O |
| 3.39139000  | 0.62365000  | 10.04051000 | #O |
| 4.85652000  | 5.12441000  | 8.74183000  | #O |
| 4.85667000  | 2.61794000  | 8.74233000  | #O |
| 3.38905000  | 0.62014000  | 7.43052000  | #O |
| 3.38349000  | 3.86650000  | 6.74613000  | #O |
| 4.86310000  | 1.91542000  | 5.43396000  | #O |
| 4.86275000  | 5.81215000  | 5.43330000  | #O |
| 3.38239000  | 3.86346000  | 4.16877000  | #O |
| 3.38425000  | 0.61147000  | 3.44707000  | #O |
| 4.86453000  | 5.08377000  | 2.01221000  | #O |
| 4.86484000  | 2.64430000  | 2.01213000  | #O |
| 3.38692000  | 0.61791000  | 0.86573000  | #O |
| 9.30131000  | 7.13572000  | 16.58963000 | #O |
| 10.77443000 | 11.59692000 | 15.47488000 | #O |



|             |             |             |    |
|-------------|-------------|-------------|----|
| 10.77561000 | 9.16119000  | 15.45847000 | #O |
| 9.30023000  | 7.13132000  | 14.01078000 | #O |
| 9.30017000  | 10.37393000 | 13.31085000 | #O |
| 10.77957000 | 8.42675000  | 12.02539000 | #O |
| 10.77474000 | 12.31463000 | 12.02513000 | #O |
| 9.29511000  | 10.36885000 | 10.73316000 | #O |
| 9.30538000  | 7.12277000  | 10.03648000 | #O |
| 10.77786000 | 11.62054000 | 8.73359000  | #O |
| 10.77836000 | 9.11469000  | 8.73220000  | #O |
| 9.30802000  | 7.11675000  | 7.42728000  | #O |
| 9.30003000  | 10.36094000 | 6.72777000  | #O |
| 10.78196000 | 8.41390000  | 5.43017000  | #O |
| 10.78163000 | 12.30609000 | 5.42894000  | #O |
| 9.29806000  | 10.36032000 | 4.15363000  | #O |
| 9.30229000  | 7.11240000  | 3.44680000  | #O |
| 10.78136000 | 11.57983000 | 1.99889000  | #O |
| 10.78098000 | 9.14090000  | 1.99628000  | #O |
| 9.30321000  | 7.10889000  | 0.86617000  | #O |
| 0.42199000  | 7.14489000  | 16.57055000 | #O |
| 1.89756000  | 11.59877000 | 15.47127000 | #O |
| 1.90261000  | 9.16776000  | 15.46712000 | #O |
| 0.42729000  | 7.13585000  | 14.00178000 | #O |
| 0.42202000  | 10.37471000 | 13.30880000 | #O |
| 1.90649000  | 8.42625000  | 12.02612000 | #O |
| 1.90271000  | 12.31185000 | 12.02208000 | #O |
| 0.42266000  | 10.36846000 | 10.73274000 | #O |
| 0.43579000  | 7.12194000  | 10.03835000 | #O |
| 1.90232000  | 11.62069000 | 8.72921000  | #O |
| 1.90201000  | 9.11463000  | 8.73190000  | #O |
| 0.42692000  | 7.11622000  | 7.42877000  | #O |
| 0.42358000  | 10.36082000 | 6.72787000  | #O |
| 1.90545000  | 8.41222000  | 5.43397000  | #O |
| 1.90484000  | 12.30723000 | 5.42998000  | #O |
| 0.42584000  | 10.36031000 | 4.15350000  | #O |
| 0.42811000  | 7.11310000  | 3.44653000  | #O |
| 1.90527000  | 11.57864000 | 1.99738000  | #O |
| 1.90553000  | 9.13930000  | 1.99897000  | #O |
| 0.42643000  | 7.10918000  | 0.86542000  | #O |
| 3.36778000  | 7.11332000  | 16.58541000 | #O |
| 4.85783000  | 11.59743000 | 15.47718000 | #O |
| 4.85431000  | 9.16209000  | 15.47283000 | #O |
| 3.38759000  | 7.13367000  | 14.01211000 | #O |
| 3.38310000  | 10.37729000 | 13.30908000 | #O |
| 4.86571000  | 8.42642000  | 12.03123000 | #O |
| 4.86785000  | 12.31303000 | 12.02206000 | #O |
| 3.38102000  | 10.36780000 | 10.73314000 | #O |
| 3.39091000  | 7.12222000  | 10.04234000 | #O |
| 4.86077000  | 11.62009000 | 8.73367000  | #O |
| 4.86053000  | 9.11518000  | 8.73275000  | #O |
| 3.38848000  | 7.11808000  | 7.43221000  | #O |
| 3.38234000  | 10.36040000 | 6.72800000  | #O |
| 4.86406000  | 8.41387000  | 5.43076000  | #O |
| 4.86281000  | 12.30613000 | 5.43017000  | #O |
| 3.38094000  | 10.36011000 | 4.15356000  | #O |
| 3.38436000  | 7.11282000  | 3.44787000  | #O |

|             |             |             |     |
|-------------|-------------|-------------|-----|
| 4.86372000  | 11.57964000 | 1.99865000  | #O  |
| 4.86375000  | 9.14050000  | 1.99640000  | #O  |
| 3.38637000  | 7.10785000  | 0.86663000  | #O  |
| 6.32489000  | 0.64107000  | 16.59292000 | #O  |
| 7.82187000  | 5.10590000  | 15.46752000 | #O  |
| 7.81888000  | 2.66430000  | 15.46851000 | #O  |
| 6.35012000  | 0.61353000  | 14.01256000 | #O  |
| 6.35419000  | 3.89032000  | 13.30456000 | #O  |
| 7.82143000  | 1.92466000  | 12.02838000 | #O  |
| 7.82152000  | 5.82629000  | 12.02976000 | #O  |
| 6.32179000  | 3.87272000  | 10.74585000 | #O  |
| 6.35137000  | 0.62098000  | 10.03860000 | #O  |
| 7.81755000  | 5.12431000  | 8.73383000  | #O  |
| 7.81799000  | 2.61845000  | 8.73545000  | #O  |
| 6.34284000  | 0.62169000  | 7.43076000  | #O  |
| 6.34169000  | 3.86498000  | 6.74017000  | #O  |
| 7.82347000  | 1.91476000  | 5.43512000  | #O  |
| 7.82255000  | 5.81197000  | 5.43114000  | #O  |
| 6.34255000  | 3.86415000  | 4.16541000  | #O  |
| 6.34430000  | 0.61126000  | 3.44883000  | #O  |
| 7.82278000  | 5.08196000  | 2.00388000  | #O  |
| 7.82279000  | 2.64294000  | 2.00779000  | #O  |
| 6.34379000  | 0.61693000  | 0.86674000  | #O  |
| 6.33386000  | 7.13453000  | 16.60311000 | #O  |
| 7.81520000  | 11.59962000 | 15.46826000 | #O  |
| 7.81494000  | 9.16174000  | 15.46767000 | #O  |
| 6.34039000  | 7.12752000  | 14.02233000 | #O  |
| 6.33827000  | 10.37354000 | 13.31231000 | #O  |
| 7.82156000  | 8.42611000  | 12.03216000 | #O  |
| 7.82457000  | 12.31523000 | 12.03336000 | #O  |
| 6.34292000  | 10.36736000 | 10.73368000 | #O  |
| 6.34998000  | 7.12262000  | 10.03845000 | #O  |
| 7.81916000  | 11.62042000 | 8.72867000  | #O  |
| 7.81968000  | 9.11469000  | 8.73042000  | #O  |
| 6.34362000  | 7.11697000  | 7.42988000  | #O  |
| 6.34058000  | 10.35986000 | 6.72811000  | #O  |
| 7.82312000  | 8.41201000  | 5.43400000  | #O  |
| 7.82174000  | 12.30710000 | 5.43094000  | #O  |
| 6.34311000  | 10.36051000 | 4.15369000  | #O  |
| 6.34521000  | 7.11152000  | 3.44856000  | #O  |
| 7.82217000  | 11.57856000 | 1.99748000  | #O  |
| 7.82285000  | 9.13937000  | 1.99902000  | #O  |
| 6.34395000  | 7.10885000  | 0.86675000  | #O  |
| 9.29395000  | 3.89936000  | 15.10276000 | #Ti |
| 10.76644000 | 0.63345000  | 15.50787000 | #Ti |
| 9.29321000  | 0.59860000  | 12.14998000 | #Ti |
| 10.78519000 | 3.83566000  | 11.90977000 | #Ti |
| 9.24547000  | 3.87231000  | 8.72374000  | #Ti |
| 10.62973000 | 0.62572000  | 8.73302000  | #Ti |
| 9.29611000  | 0.58390000  | 5.31610000  | #Ti |
| 10.78191000 | 3.82599000  | 5.53752000  | #Ti |
| 9.30217000  | 3.86433000  | 2.34906000  | #Ti |
| 10.78115000 | 0.61791000  | 1.95306000  | #Ti |
| 0.40593000  | 3.86090000  | 15.12295000 | #Ti |
| 1.88559000  | 0.62727000  | 15.45915000 | #Ti |

|             |             |             |     |
|-------------|-------------|-------------|-----|
| 0.41542000  | 0.58903000  | 12.12451000 | #Ti |
| 1.93165000  | 3.82807000  | 12.02388000 | #Ti |
| 0.37413000  | 3.87220000  | 8.77224000  | #Ti |
| 1.75655000  | 0.62372000  | 8.72056000  | #Ti |
| 0.42086000  | 0.58595000  | 5.31243000  | #Ti |
| 1.90068000  | 3.82958000  | 5.55695000  | #Ti |
| 0.42730000  | 3.86381000  | 2.35112000  | #Ti |
| 1.90548000  | 0.61742000  | 1.94988000  | #Ti |
| 3.36461000  | 3.93667000  | 15.33100000 | #Ti |
| 4.84907000  | 0.63699000  | 15.47821000 | #Ti |
| 3.37690000  | 0.58172000  | 12.11963000 | #Ti |
| 4.81437000  | 3.83310000  | 12.01722000 | #Ti |
| 3.32865000  | 3.87168000  | 8.77450000  | #Ti |
| 4.71883000  | 0.62339000  | 8.72640000  | #Ti |
| 3.37843000  | 0.58967000  | 5.31069000  | #Ti |
| 4.85700000  | 3.82892000  | 5.55520000  | #Ti |
| 3.38490000  | 3.86347000  | 2.35738000  | #Ti |
| 4.86538000  | 0.61707000  | 1.95253000  | #Ti |
| 9.29377000  | 10.37571000 | 15.12368000 | #Ti |
| 10.76774000 | 7.12730000  | 15.48135000 | #Ti |
| 9.29201000  | 7.09529000  | 12.13588000 | #Ti |
| 10.77178000 | 10.33180000 | 11.92827000 | #Ti |
| 9.24132000  | 10.36788000 | 8.73043000  | #Ti |
| 10.63098000 | 7.11678000  | 8.72736000  | #Ti |
| 9.29616000  | 7.07847000  | 5.31383000  | #Ti |
| 10.77453000 | 10.32294000 | 5.52908000  | #Ti |
| 9.30138000  | 10.36053000 | 2.33862000  | #Ti |
| 10.78134000 | 7.11107000  | 1.95145000  | #Ti |
| 0.41285000  | 10.38302000 | 15.12017000 | #Ti |
| 1.89072000  | 7.16601000  | 15.46653000 | #Ti |
| 0.41747000  | 7.08309000  | 12.11655000 | #Ti |
| 1.89639000  | 10.32588000 | 11.92931000 | #Ti |
| 0.36437000  | 10.36890000 | 8.72997000  | #Ti |
| 1.75932000  | 7.11871000  | 8.72040000  | #Ti |
| 0.42053000  | 7.08205000  | 5.31068000  | #Ti |
| 1.89876000  | 10.32531000 | 5.52998000  | #Ti |
| 0.42556000  | 10.36072000 | 2.33856000  | #Ti |
| 1.90588000  | 7.11009000  | 1.95028000  | #Ti |
| 3.38177000  | 10.39503000 | 15.11999000 | #Ti |
| 4.85442000  | 7.15016000  | 15.50606000 | #Ti |
| 3.37832000  | 7.08852000  | 12.13041000 | #Ti |
| 4.85715000  | 10.33128000 | 11.92864000 | #Ti |
| 3.32416000  | 10.36798000 | 8.73096000  | #Ti |
| 4.71779000  | 7.11875000  | 8.73277000  | #Ti |
| 3.37901000  | 7.08286000  | 5.31212000  | #Ti |
| 4.85707000  | 10.32564000 | 5.52926000  | #Ti |
| 3.38388000  | 10.35968000 | 2.33845000  | #Ti |
| 4.86561000  | 7.11076000  | 1.95298000  | #Ti |
| 6.34238000  | 3.86272000  | 15.11012000 | #Ti |
| 7.80663000  | 0.63651000  | 15.51427000 | #Ti |
| 6.33660000  | 0.59803000  | 12.13893000 | #Ti |
| 7.80493000  | 3.83960000  | 11.90690000 | #Ti |
| 6.28253000  | 3.87187000  | 8.77392000  | #Ti |
| 7.67525000  | 0.62516000  | 8.73321000  | #Ti |
| 6.33669000  | 0.58517000  | 5.31569000  | #Ti |

|            |             |             |     |
|------------|-------------|-------------|-----|
| 7.80991000 | 3.82540000  | 5.53994000  | #Ti |
| 6.34303000 | 3.86447000  | 2.35170000  | #Ti |
| 7.82365000 | 0.61782000  | 1.95362000  | #Ti |
| 6.34182000 | 10.38038000 | 15.12487000 | #Ti |
| 7.81135000 | 7.12141000  | 15.51241000 | #Ti |
| 6.33602000 | 7.09056000  | 12.14715000 | #Ti |
| 7.81461000 | 10.33771000 | 11.93348000 | #Ti |
| 6.28389000 | 10.36807000 | 8.73054000  | #Ti |
| 7.67244000 | 7.11708000  | 8.73251000  | #Ti |
| 6.33700000 | 7.08127000  | 5.31636000  | #Ti |
| 7.81589000 | 10.32183000 | 5.53016000  | #Ti |
| 6.34307000 | 10.36066000 | 2.33857000  | #Ti |
| 7.82335000 | 7.11060000  | 1.95307000  | #Ti |

Rut-Met-D

1.000000000

11.834800 0.000000 0.000000

0.000000 12.992946 0.000000

0.000000 0.000000 30.000000

H C N O S Ti

11 5 1 162 1 80

Cartesian

|            |            |             |    |
|------------|------------|-------------|----|
| 6.19777000 | 3.75054000 | 19.96853000 | #H |
| 6.27431000 | 5.32257000 | 20.74944000 | #H |
| 4.43442000 | 5.91300000 | 19.53196000 | #H |
| 5.46194000 | 6.00891000 | 18.10905000 | #H |
| 2.15948000 | 5.46516000 | 18.33004000 | #H |
| 1.76683000 | 3.71157000 | 18.29408000 | #H |
| 2.38993000 | 4.43628000 | 19.79737000 | #H |
| 8.47003000 | 4.63218000 | 19.96058000 | #H |
| 9.36775000 | 6.89506000 | 17.58889000 | #H |
| 7.44094000 | 6.95790000 | 18.47264000 | #H |
| 8.30338000 | 6.94127000 | 19.89811000 | #H |
| 6.32105000 | 4.82593000 | 19.76739000 | #C |
| 5.13345000 | 5.34051000 | 18.91023000 | #C |
| 2.44461000 | 4.47351000 | 18.70198000 | #C |
| 8.00230000 | 4.34756000 | 17.90178000 | #C |
| 7.76039000 | 5.05768000 | 19.23395000 | #C |
| 8.16400000 | 6.46177000 | 19.00849000 | #N |
| 9.18278000 | 4.23085000 | 17.44025000 | #O |
| 6.94520000 | 3.99125000 | 17.28087000 | #O |
| 3.73047000 | 0.77978000 | 16.64916000 | #O |
| 5.22243000 | 5.27688000 | 15.39267000 | #O |
| 5.17119000 | 2.77584000 | 15.39870000 | #O |
| 3.70575000 | 0.74545000 | 14.06850000 | #O |
| 3.69560000 | 4.04006000 | 13.39033000 | #O |
| 5.18873000 | 2.06217000 | 12.09282000 | #O |
| 5.19676000 | 5.99058000 | 12.09588000 | #O |
| 3.72260000 | 4.03036000 | 10.80400000 | #O |
| 3.71733000 | 0.76235000 | 10.08472000 | #O |
| 5.19279000 | 5.28012000 | 8.78194000  | #O |
| 5.18933000 | 2.77002000 | 8.80188000  | #O |
| 3.72300000 | 0.77099000 | 7.47774000  | #O |
| 3.71042000 | 4.02791000 | 6.79668000  | #O |

|             |             |             |    |
|-------------|-------------|-------------|----|
| 5.19272000  | 2.07464000  | 5.48876000  | #O |
| 5.18892000  | 5.97885000  | 5.47209000  | #O |
| 3.71235000  | 4.02210000  | 4.22173000  | #O |
| 3.71670000  | 0.76760000  | 3.50388000  | #O |
| 5.18850000  | 5.24494000  | 2.05925000  | #O |
| 5.19004000  | 2.80400000  | 2.06838000  | #O |
| 3.70920000  | 0.77711000  | 0.92395000  | #O |
| 6.69168000  | 0.82854000  | 16.62087000 | #O |
| 8.14597000  | 5.28558000  | 15.24087000 | #O |
| 8.20836000  | 2.75048000  | 15.27578000 | #O |
| 6.66595000  | 0.71014000  | 14.04808000 | #O |
| 6.66057000  | 4.00272000  | 13.35480000 | #O |
| 8.16036000  | 2.06248000  | 12.10696000 | #O |
| 8.15366000  | 5.99414000  | 12.11112000 | #O |
| 6.67929000  | 4.03125000  | 10.81766000 | #O |
| 6.67979000  | 0.76703000  | 10.08558000 | #O |
| 8.14619000  | 5.28285000  | 8.79486000  | #O |
| 8.14803000  | 2.77038000  | 8.79121000  | #O |
| 6.67703000  | 0.77087000  | 7.47921000  | #O |
| 6.66921000  | 4.02790000  | 6.79889000  | #O |
| 8.15046000  | 2.07266000  | 5.48754000  | #O |
| 8.15070000  | 5.97836000  | 5.47506000  | #O |
| 6.67059000  | 4.02396000  | 4.22290000  | #O |
| 6.66937000  | 0.76656000  | 3.50286000  | #O |
| 8.14743000  | 5.24320000  | 2.05801000  | #O |
| 8.14743000  | 2.80186000  | 2.07100000  | #O |
| 6.66774000  | 0.77983000  | 0.92252000  | #O |
| 9.62912000  | 0.79429000  | 16.63983000 | #O |
| 11.15055000 | 5.26947000  | 15.48488000 | #O |
| 11.13064000 | 2.80224000  | 15.52197000 | #O |
| 9.66312000  | 0.71355000  | 14.05859000 | #O |
| 9.67265000  | 4.03471000  | 13.37729000 | #O |
| 11.11829000 | 2.06326000  | 12.08188000 | #O |
| 11.12182000 | 5.99105000  | 12.09653000 | #O |
| 9.61842000  | 4.02857000  | 10.81039000 | #O |
| 9.63924000  | 0.76326000  | 10.08586000 | #O |
| 11.10509000 | 5.27843000  | 8.78635000  | #O |
| 11.10381000 | 2.77071000  | 8.80020000  | #O |
| 9.63864000  | 0.77123000  | 7.47934000  | #O |
| 9.62717000  | 4.02756000  | 6.80091000  | #O |
| 11.10941000 | 2.07543000  | 5.49028000  | #O |
| 11.10432000 | 5.97896000  | 5.47940000  | #O |
| 9.62956000  | 4.02234000  | 4.22336000  | #O |
| 9.63442000  | 0.76713000  | 3.50358000  | #O |
| 11.10531000 | 5.24446000  | 2.05899000  | #O |
| 11.10688000 | 2.80389000  | 2.06889000  | #O |
| 9.62723000  | 0.77769000  | 0.92363000  | #O |
| 3.73926000  | 7.25305000  | 16.65230000 | #O |
| 5.20306000  | 11.73605000 | 15.53195000 | #O |
| 5.19488000  | 9.30922000  | 15.54910000 | #O |
| 3.69427000  | 7.31289000  | 14.07956000 | #O |
| 3.71955000  | 10.50997000 | 13.36569000 | #O |
| 5.18935000  | 8.57610000  | 12.05864000 | #O |
| 5.18988000  | 12.45809000 | 12.06842000 | #O |
| 3.70865000  | 10.51598000 | 10.78255000 | #O |

|             |             |             |    |
|-------------|-------------|-------------|----|
| 3.72775000  | 7.26954000  | 10.07898000 | #O |
| 5.19170000  | 11.76282000 | 8.77603000  | #O |
| 5.19242000  | 9.25345000  | 8.77551000  | #O |
| 3.69875000  | 7.27094000  | 7.47589000  | #O |
| 3.70937000  | 10.50759000 | 6.77393000  | #O |
| 5.18973000  | 8.56852000  | 5.46322000  | #O |
| 5.19235000  | 12.46218000 | 5.48676000  | #O |
| 3.71185000  | 10.51916000 | 4.19774000  | #O |
| 3.71237000  | 7.27424000  | 3.47005000  | #O |
| 5.18948000  | 11.73302000 | 2.04002000  | #O |
| 5.18859000  | 9.29260000  | 2.03483000  | #O |
| 3.70671000  | 7.26016000  | 0.88651000  | #O |
| 6.71603000  | 7.23788000  | 16.58987000 | #O |
| 8.15867000  | 11.72542000 | 15.53574000 | #O |
| 8.15802000  | 9.29401000  | 15.50740000 | #O |
| 6.65101000  | 7.36106000  | 14.04894000 | #O |
| 6.67356000  | 10.51533000 | 13.35703000 | #O |
| 8.15723000  | 8.57752000  | 12.05710000 | #O |
| 8.15882000  | 12.45864000 | 12.06816000 | #O |
| 6.67151000  | 10.51666000 | 10.78027000 | #O |
| 6.68029000  | 7.27007000  | 10.07774000 | #O |
| 8.14754000  | 11.76515000 | 8.77492000  | #O |
| 8.14826000  | 9.25609000  | 8.78216000  | #O |
| 6.67138000  | 7.27105000  | 7.46497000  | #O |
| 6.67079000  | 10.50726000 | 6.77280000  | #O |
| 8.15038000  | 8.56925000  | 5.46319000  | #O |
| 8.15107000  | 12.46394000 | 5.48422000  | #O |
| 6.66804000  | 10.51880000 | 4.19664000  | #O |
| 6.66893000  | 7.27435000  | 3.46621000  | #O |
| 8.14730000  | 11.73395000 | 2.04337000  | #O |
| 8.14868000  | 9.29269000  | 2.03417000  | #O |
| 6.66868000  | 7.26150000  | 0.88017000  | #O |
| 9.59996000  | 7.22354000  | 16.67099000 | #O |
| 11.11473000 | 11.73280000 | 15.53215000 | #O |
| 11.11723000 | 9.29721000  | 15.55119000 | #O |
| 9.65638000  | 7.34774000  | 14.07248000 | #O |
| 9.63475000  | 10.51075000 | 13.36066000 | #O |
| 11.12274000 | 8.57849000  | 12.07302000 | #O |
| 11.12494000 | 12.45851000 | 12.07756000 | #O |
| 9.63527000  | 10.52064000 | 10.78081000 | #O |
| 9.64854000  | 7.27216000  | 10.09754000 | #O |
| 11.10893000 | 11.76398000 | 8.77449000  | #O |
| 11.10531000 | 9.25723000  | 8.77726000  | #O |
| 9.62326000  | 7.26901000  | 7.49702000  | #O |
| 9.62473000  | 10.50739000 | 6.77391000  | #O |
| 11.10419000 | 8.56800000  | 5.46808000  | #O |
| 11.11010000 | 12.46257000 | 5.48866000  | #O |
| 9.62990000  | 10.51898000 | 4.19719000  | #O |
| 9.62638000  | 7.27231000  | 3.46973000  | #O |
| 11.10698000 | 11.73307000 | 2.04039000  | #O |
| 11.10666000 | 9.29267000  | 2.03608000  | #O |
| 9.63053000  | 7.26113000  | 0.88606000  | #O |
| 0.76247000  | 0.76392000  | 16.65805000 | #O |
| 2.21310000  | 5.27260000  | 15.50523000 | #O |
| 2.23378000  | 2.81237000  | 15.55184000 | #O |

|            |             |             |     |
|------------|-------------|-------------|-----|
| 0.76381000 | 0.77730000  | 14.07489000 | #O  |
| 0.76466000 | 4.00907000  | 13.35945000 | #O  |
| 2.23921000 | 2.06710000  | 12.08108000 | #O  |
| 2.23166000 | 5.99047000  | 12.09944000 | #O  |
| 0.75917000 | 4.03336000  | 10.80257000 | #O  |
| 0.76342000 | 0.76629000  | 10.08641000 | #O  |
| 2.23322000 | 5.27691000  | 8.79082000  | #O  |
| 2.23296000 | 2.76993000  | 8.78943000  | #O  |
| 0.75917000 | 0.77316000  | 7.47973000  | #O  |
| 0.75291000 | 4.02825000  | 6.79622000  | #O  |
| 2.23344000 | 2.07406000  | 5.48704000  | #O  |
| 2.23324000 | 5.97760000  | 5.47388000  | #O  |
| 0.75075000 | 4.02547000  | 4.22264000  | #O  |
| 0.75211000 | 0.76681000  | 3.50427000  | #O  |
| 2.23040000 | 5.24281000  | 2.06035000  | #O  |
| 2.22932000 | 2.80202000  | 2.07060000  | #O  |
| 0.75110000 | 0.77945000  | 0.92342000  | #O  |
| 0.75861000 | 7.27695000  | 16.67317000 | #O  |
| 2.23916000 | 11.74172000 | 15.52215000 | #O  |
| 2.24203000 | 9.30595000  | 15.54631000 | #O  |
| 0.73846000 | 7.30333000  | 14.09769000 | #O  |
| 0.75516000 | 10.51335000 | 13.36895000 | #O  |
| 2.23273000 | 8.57364000  | 12.08072000 | #O  |
| 2.23372000 | 12.45749000 | 12.08616000 | #O  |
| 0.75777000 | 10.51484000 | 10.78250000 | #O  |
| 0.75190000 | 7.27231000  | 10.08397000 | #O  |
| 2.23073000 | 11.76602000 | 8.77325000  | #O  |
| 2.23221000 | 9.26096000  | 8.78069000  | #O  |
| 0.75986000 | 7.26947000  | 7.47880000  | #O  |
| 0.75255000 | 10.50679000 | 6.77419000  | #O  |
| 2.23133000 | 8.57030000  | 5.46337000  | #O  |
| 2.23282000 | 12.46457000 | 5.48661000  | #O  |
| 0.75014000 | 10.51926000 | 4.19886000  | #O  |
| 0.74997000 | 7.27231000  | 3.47671000  | #O  |
| 2.22990000 | 11.73412000 | 2.04593000  | #O  |
| 2.23051000 | 9.29338000  | 2.03612000  | #O  |
| 0.75349000 | 7.26103000  | 0.88801000  | #O  |
| 4.10128000 | 4.00890000  | 18.14568000 | #S  |
| 3.73490000 | 4.09978000  | 15.30107000 | #Ti |
| 5.20103000 | 0.75827000  | 15.54745000 | #Ti |
| 3.71278000 | 0.78216000  | 12.20242000 | #Ti |
| 5.20708000 | 4.03745000  | 12.08300000 | #Ti |
| 3.68035000 | 4.00991000  | 8.83062000  | #Ti |
| 5.04827000 | 0.77485000  | 8.78473000  | #Ti |
| 3.70548000 | 0.80409000  | 5.37597000  | #Ti |
| 5.19511000 | 4.04874000  | 5.62186000  | #Ti |
| 3.71024000 | 4.02033000  | 2.41601000  | #Ti |
| 5.18610000 | 0.77606000  | 2.01207000  | #Ti |
| 6.67665000 | 3.92400000  | 15.29604000 | #Ti |
| 8.17179000 | 0.75260000  | 15.52621000 | #Ti |
| 6.67296000 | 0.79484000  | 12.18937000 | #Ti |
| 8.16319000 | 4.04662000  | 12.14883000 | #Ti |
| 6.63724000 | 4.02994000  | 8.89676000  | #Ti |
| 8.00677000 | 0.77408000  | 8.78023000  | #Ti |
| 6.66724000 | 0.79817000  | 5.37290000  | #Ti |

|             |             |             |     |
|-------------|-------------|-------------|-----|
| 8.14133000  | 4.05517000  | 5.62449000  | #Ti |
| 6.66868000  | 4.02208000  | 2.41463000  | #Ti |
| 8.14461000  | 0.77604000  | 2.00968000  | #Ti |
| 9.62097000  | 4.06062000  | 15.39394000 | #Ti |
| 11.12147000 | 0.77843000  | 15.56199000 | #Ti |
| 9.63191000  | 0.78557000  | 12.19379000 | #Ti |
| 11.06393000 | 4.03480000  | 12.04011000 | #Ti |
| 9.58920000  | 4.01015000  | 8.85299000  | #Ti |
| 10.96817000 | 0.77582000  | 8.78313000  | #Ti |
| 9.61914000  | 0.79985000  | 5.37317000  | #Ti |
| 11.10383000 | 4.04603000  | 5.62113000  | #Ti |
| 9.62706000  | 4.02053000  | 2.41738000  | #Ti |
| 11.10457000 | 0.77618000  | 2.01177000  | #Ti |
| 3.71471000  | 10.53312000 | 15.17945000 | #Ti |
| 5.21989000  | 7.28980000  | 15.51304000 | #Ti |
| 3.71859000  | 7.28818000  | 12.19393000 | #Ti |
| 5.18792000  | 10.54462000 | 11.97992000 | #Ti |
| 3.65705000  | 10.52925000 | 8.78239000  | #Ti |
| 5.03408000  | 7.26050000  | 8.75949000  | #Ti |
| 3.70785000  | 7.29498000  | 5.32461000  | #Ti |
| 5.18498000  | 10.55300000 | 5.57823000  | #Ti |
| 3.70972000  | 10.51619000 | 2.38327000  | #Ti |
| 5.18703000  | 7.26339000  | 1.96654000  | #Ti |
| 6.68287000  | 10.51222000 | 15.16956000 | #Ti |
| 8.05803000  | 7.25254000  | 15.26893000 | #Ti |
| 6.67141000  | 7.29140000  | 11.93747000 | #Ti |
| 8.14886000  | 10.54620000 | 11.97699000 | #Ti |
| 6.61569000  | 10.49737000 | 8.77886000  | #Ti |
| 8.08487000  | 7.26347000  | 8.62882000  | #Ti |
| 6.66131000  | 7.29226000  | 5.31793000  | #Ti |
| 8.14411000  | 10.54044000 | 5.57400000  | #Ti |
| 6.66816000  | 10.51520000 | 2.38227000  | #Ti |
| 8.14796000  | 7.26340000  | 1.96315000  | #Ti |
| 9.63768000  | 10.49336000 | 15.17493000 | #Ti |
| 11.19584000 | 7.27197000  | 15.53398000 | #Ti |
| 9.63740000  | 7.29897000  | 12.16621000 | #Ti |
| 11.10863000 | 10.53819000 | 11.98358000 | #Ti |
| 9.57651000  | 10.53005000 | 8.78115000  | #Ti |
| 11.01383000 | 7.26073000  | 8.84700000  | #Ti |
| 9.63030000  | 7.28941000  | 5.31470000  | #Ti |
| 11.10260000 | 10.55611000 | 5.57964000  | #Ti |
| 9.62758000  | 10.51617000 | 2.38257000  | #Ti |
| 11.11293000 | 7.26301000  | 1.97489000  | #Ti |
| 0.75900000  | 4.00093000  | 15.16051000 | #Ti |
| 2.24543000  | 0.80895000  | 15.56686000 | #Ti |
| 0.75164000  | 0.78857000  | 12.20289000 | #Ti |
| 2.26296000  | 4.02573000  | 12.01410000 | #Ti |
| 0.71761000  | 4.02630000  | 8.86129000  | #Ti |
| 2.08912000  | 0.77641000  | 8.78703000  | #Ti |
| 0.74973000  | 0.80330000  | 5.37519000  | #Ti |
| 2.22575000  | 4.05944000  | 5.61124000  | #Ti |
| 0.75076000  | 4.02208000  | 2.41399000  | #Ti |
| 2.22788000  | 0.77602000  | 2.01197000  | #Ti |
| 0.75925000  | 10.54112000 | 15.18372000 | #Ti |
| 2.27888000  | 7.29212000  | 15.56168000 | #Ti |



|            |             |             |     |
|------------|-------------|-------------|-----|
| 0.76315000 | 7.27545000  | 12.18045000 | #Ti |
| 2.22871000 | 10.53810000 | 11.98546000 | #Ti |
| 0.70026000 | 10.50149000 | 8.78148000  | #Ti |
| 2.10904000 | 7.26147000  | 8.74113000  | #Ti |
| 0.74408000 | 7.29687000  | 5.34680000  | #Ti |
| 2.22662000 | 10.54942000 | 5.57633000  | #Ti |
| 0.75072000 | 10.51540000 | 2.38442000  | #Ti |
| 2.22881000 | 7.26339000  | 1.98057000  | #Ti |

Rut-Met-Z

1.000000000

|           |           |           |
|-----------|-----------|-----------|
| 11.834800 | 0.000000  | 0.000000  |
| 0.000000  | 12.992946 | 0.000000  |
| 0.000000  | 0.000000  | 30.000000 |

H C N O S Ti

11 5 1 162 1 80

Cartesian

|            |            |             |    |
|------------|------------|-------------|----|
| 6.18833000 | 3.85997000 | 20.03174000 | #H |
| 6.22362000 | 5.47625000 | 20.70697000 | #H |
| 4.31454000 | 5.86529000 | 19.54796000 | #H |
| 5.29286000 | 6.03456000 | 18.10285000 | #H |
| 2.07961000 | 5.35515000 | 18.27700000 | #H |
| 1.74224000 | 3.58946000 | 18.30446000 | #H |
| 2.32886000 | 4.39149000 | 19.78435000 | #H |
| 8.42800000 | 4.86082000 | 19.93934000 | #H |
| 8.85412000 | 6.68580000 | 18.27537000 | #H |
| 7.24617000 | 6.88759000 | 17.93317000 | #H |
| 7.87159000 | 7.19811000 | 19.56203000 | #H |
| 6.26401000 | 4.92215000 | 19.75486000 | #C |
| 5.03310000 | 5.34116000 | 18.90647000 | #C |
| 2.39211000 | 4.38760000 | 18.68863000 | #C |
| 7.95645000 | 4.32694000 | 17.90182000 | #C |
| 7.67972000 | 5.13043000 | 19.17913000 | #C |
| 7.93235000 | 6.55554000 | 18.76828000 | #N |
| 9.14803000 | 4.21805000 | 17.48834000 | #O |
| 6.90296000 | 3.94501000 | 17.30077000 | #O |
| 3.72307000 | 0.78307000 | 16.66067000 | #O |
| 5.21229000 | 5.26667000 | 15.40973000 | #O |
| 5.16615000 | 2.76924000 | 15.39802000 | #O |
| 3.70894000 | 0.74094000 | 14.07834000 | #O |
| 3.69522000 | 4.04194000 | 13.39266000 | #O |
| 5.18765000 | 2.06782000 | 12.09392000 | #O |
| 5.19651000 | 5.99342000 | 12.10586000 | #O |
| 3.71898000 | 4.03355000 | 10.80607000 | #O |
| 3.71790000 | 0.76493000 | 10.08747000 | #O |
| 5.19984000 | 5.27982000 | 8.79044000  | #O |
| 5.19411000 | 2.77153000 | 8.80742000  | #O |
| 3.72835000 | 0.77293000 | 7.48233000  | #O |
| 3.71781000 | 4.02932000 | 6.79985000  | #O |
| 5.19785000 | 2.07169000 | 5.49243000  | #O |
| 5.20083000 | 5.97486000 | 5.47142000  | #O |
| 3.71632000 | 4.01967000 | 4.22556000  | #O |
| 3.72030000 | 0.76340000 | 3.51251000  | #O |
| 5.19905000 | 5.24175000 | 2.06044000  | #O |

|             |             |             |    |
|-------------|-------------|-------------|----|
| 5.19673000  | 2.80077000  | 2.07236000  | #O |
| 3.71708000  | 0.77149000  | 0.93261000  | #O |
| 6.68563000  | 0.82487000  | 16.63365000 | #O |
| 8.13087000  | 5.27417000  | 15.27766000 | #O |
| 8.20072000  | 2.74447000  | 15.28375000 | #O |
| 6.66168000  | 0.70996000  | 14.05633000 | #O |
| 6.65727000  | 4.00336000  | 13.35721000 | #O |
| 8.16067000  | 2.06430000  | 12.11487000 | #O |
| 8.15734000  | 5.99420000  | 12.12822000 | #O |
| 6.68299000  | 4.03454000  | 10.82072000 | #O |
| 6.68009000  | 0.76737000  | 10.08685000 | #O |
| 8.15362000  | 5.28262000  | 8.79230000  | #O |
| 8.15323000  | 2.77142000  | 8.79702000  | #O |
| 6.68400000  | 0.77224000  | 7.48155000  | #O |
| 6.67432000  | 4.02712000  | 6.80247000  | #O |
| 8.15632000  | 2.07197000  | 5.49169000  | #O |
| 8.15499000  | 5.97699000  | 5.47511000  | #O |
| 6.67727000  | 4.01756000  | 4.22527000  | #O |
| 6.67757000  | 0.76256000  | 3.51006000  | #O |
| 8.15473000  | 5.24030000  | 2.05940000  | #O |
| 8.15633000  | 2.79837000  | 2.07198000  | #O |
| 6.67629000  | 0.77325000  | 0.93062000  | #O |
| 9.62236000  | 0.79159000  | 16.65023000 | #O |
| 11.14146000 | 5.25781000  | 15.51923000 | #O |
| 11.12430000 | 2.79715000  | 15.52894000 | #O |
| 9.66310000  | 0.71547000  | 14.06671000 | #O |
| 9.67196000  | 4.03958000  | 13.39176000 | #O |
| 11.11870000 | 2.07021000  | 12.08854000 | #O |
| 11.12354000 | 5.99318000  | 12.10423000 | #O |
| 9.61899000  | 4.03373000  | 10.81796000 | #O |
| 9.64258000  | 0.76493000  | 10.09000000 | #O |
| 11.10484000 | 5.27866000  | 8.79120000  | #O |
| 11.10809000 | 2.77107000  | 8.80386000  | #O |
| 9.64227000  | 0.77297000  | 7.48437000  | #O |
| 9.63364000  | 4.02620000  | 6.80328000  | #O |
| 11.11377000 | 2.07245000  | 5.49255000  | #O |
| 11.11009000 | 5.97591000  | 5.47733000  | #O |
| 9.63394000  | 4.02122000  | 4.22474000  | #O |
| 9.63769000  | 0.76352000  | 3.50979000  | #O |
| 11.11464000 | 5.24084000  | 2.05564000  | #O |
| 11.11468000 | 2.80044000  | 2.07467000  | #O |
| 9.63668000  | 0.77144000  | 0.93112000  | #O |
| 3.74168000  | 7.25145000  | 16.67513000 | #O |
| 5.19961000  | 11.73235000 | 15.55030000 | #O |
| 5.18882000  | 9.30836000  | 15.55697000 | #O |
| 3.69604000  | 7.30873000  | 14.09780000 | #O |
| 3.72053000  | 10.51503000 | 13.37338000 | #O |
| 5.18691000  | 8.57601000  | 12.06891000 | #O |
| 5.19005000  | 12.46117000 | 12.06994000 | #O |
| 3.70865000  | 10.51701000 | 10.78828000 | #O |
| 3.72115000  | 7.26761000  | 10.05411000 | #O |
| 5.19519000  | 11.76413000 | 8.77949000  | #O |
| 5.20100000  | 9.25644000  | 8.78996000  | #O |
| 3.73214000  | 7.27094000  | 7.46797000  | #O |
| 3.71665000  | 10.49940000 | 6.78081000  | #O |

|             |             |             |    |
|-------------|-------------|-------------|----|
| 5.20068000  | 8.56561000  | 5.46177000  | #O |
| 5.19790000  | 12.45960000 | 5.49471000  | #O |
| 3.71598000  | 10.51484000 | 4.20547000  | #O |
| 3.72134000  | 7.26838000  | 3.47042000  | #O |
| 5.19792000  | 11.72791000 | 2.04678000  | #O |
| 5.19630000  | 9.28799000  | 2.03683000  | #O |
| 3.71348000  | 7.25651000  | 0.88243000  | #O |
| 6.69203000  | 7.23276000  | 16.66128000 | #O |
| 8.15151000  | 11.72737000 | 15.54528000 | #O |
| 8.15466000  | 9.29897000  | 15.53216000 | #O |
| 6.65890000  | 7.36158000  | 14.08058000 | #O |
| 6.66963000  | 10.51692000 | 13.36632000 | #O |
| 8.16221000  | 8.58450000  | 12.07959000 | #O |
| 8.15843000  | 12.46345000 | 12.07775000 | #O |
| 6.67478000  | 10.51856000 | 10.78910000 | #O |
| 6.70419000  | 7.27072000  | 10.09822000 | #O |
| 8.15487000  | 11.76358000 | 8.77905000  | #O |
| 8.15458000  | 9.25483000  | 8.78656000  | #O |
| 6.67872000  | 7.27027000  | 7.48727000  | #O |
| 6.67558000  | 10.50278000 | 6.78023000  | #O |
| 8.15524000  | 8.56371000  | 5.46390000  | #O |
| 8.15846000  | 12.45961000 | 5.49261000  | #O |
| 6.67500000  | 10.51554000 | 4.20355000  | #O |
| 6.67771000  | 7.27038000  | 3.46231000  | #O |
| 8.15585000  | 11.72811000 | 2.05201000  | #O |
| 8.15641000  | 9.28687000  | 2.03855000  | #O |
| 6.67340000  | 7.25855000  | 0.87717000  | #O |
| 9.57086000  | 7.22272000  | 16.67501000 | #O |
| 11.11393000 | 11.73739000 | 15.53689000 | #O |
| 11.11194000 | 9.30871000  | 15.58196000 | #O |
| 9.66936000  | 7.33365000  | 14.10964000 | #O |
| 9.63805000  | 10.51661000 | 13.37177000 | #O |
| 11.12216000 | 8.57487000  | 12.08365000 | #O |
| 11.12516000 | 12.46038000 | 12.08106000 | #O |
| 9.63608000  | 10.51972000 | 10.79020000 | #O |
| 9.63088000  | 7.26896000  | 10.09927000 | #O |
| 11.11344000 | 11.76407000 | 8.77787000  | #O |
| 11.10644000 | 9.25647000  | 8.78715000  | #O |
| 9.62602000  | 7.26894000  | 7.49087000  | #O |
| 9.63179000  | 10.50265000 | 6.78060000  | #O |
| 11.11041000 | 8.56435000  | 5.46641000  | #O |
| 11.11515000 | 12.46019000 | 5.49476000  | #O |
| 9.63459000  | 10.51380000 | 4.20349000  | #O |
| 9.63524000  | 7.26789000  | 3.46298000  | #O |
| 11.11590000 | 11.72806000 | 2.04883000  | #O |
| 11.11458000 | 9.28749000  | 2.03679000  | #O |
| 9.63675000  | 7.25849000  | 0.87645000  | #O |
| 0.75788000  | 0.76600000  | 16.66996000 | #O |
| 2.21137000  | 5.26440000  | 15.52716000 | #O |
| 2.22493000  | 2.80660000  | 15.54621000 | #O |
| 0.75725000  | 0.77686000  | 14.08477000 | #O |
| 0.76008000  | 4.02063000  | 13.36854000 | #O |
| 2.23872000  | 2.06903000  | 12.09822000 | #O |
| 2.23115000  | 5.99097000  | 12.10203000 | #O |
| 0.75926000  | 4.03209000  | 10.80704000 | #O |

|             |             |             |     |
|-------------|-------------|-------------|-----|
| 0.76507000  | 0.76840000  | 10.08720000 | #O  |
| 2.23512000  | 5.27696000  | 8.78796000  | #O  |
| 2.23808000  | 2.77192000  | 8.79047000  | #O  |
| 0.76725000  | 0.77346000  | 7.48104000  | #O  |
| 0.75589000  | 4.02936000  | 6.80002000  | #O  |
| 2.23947000  | 2.07410000  | 5.49374000  | #O  |
| 2.23746000  | 5.97682000  | 5.47483000  | #O  |
| 0.75747000  | 4.02088000  | 4.22528000  | #O  |
| 0.76076000  | 0.76326000  | 3.51414000  | #O  |
| 2.23799000  | 5.23924000  | 2.06052000  | #O  |
| 2.23864000  | 2.79850000  | 2.07454000  | #O  |
| 0.75993000  | 0.77246000  | 0.93415000  | #O  |
| 0.74827000  | 7.27564000  | 16.72366000 | #O  |
| 2.23257000  | 11.74187000 | 15.53114000 | #O  |
| 2.24121000  | 9.30859000  | 15.56550000 | #O  |
| 0.77786000  | 7.30412000  | 14.12531000 | #O  |
| 0.75287000  | 10.50770000 | 13.37837000 | #O  |
| 2.23402000  | 8.57844000  | 12.08903000 | #O  |
| 2.23224000  | 12.46246000 | 12.09399000 | #O  |
| 0.75828000  | 10.51620000 | 10.78938000 | #O  |
| 0.74795000  | 7.27108000  | 10.05744000 | #O  |
| 2.23629000  | 11.76303000 | 8.77673000  | #O  |
| 2.23541000  | 9.25936000  | 8.78083000  | #O  |
| 0.75112000  | 7.26810000  | 7.48371000  | #O  |
| 0.75583000  | 10.50025000 | 6.78072000  | #O  |
| 2.23640000  | 8.56278000  | 5.46593000  | #O  |
| 2.24080000  | 12.45962000 | 5.49938000  | #O  |
| 0.75777000  | 10.51361000 | 4.20594000  | #O  |
| 0.75264000  | 7.26804000  | 3.47158000  | #O  |
| 2.23782000  | 11.72814000 | 2.05492000  | #O  |
| 2.23921000  | 9.28687000  | 2.04247000  | #O  |
| 0.76327000  | 7.25785000  | 0.88329000  | #O  |
| 4.06805000  | 3.95583000  | 18.15969000 | #S  |
| 3.72634000  | 4.08468000  | 15.29583000 | #Ti |
| 5.19278000  | 0.75359000  | 15.55680000 | #Ti |
| 3.69863000  | 0.79074000  | 12.21548000 | #Ti |
| 5.20409000  | 4.03065000  | 12.07676000 | #Ti |
| 3.69173000  | 4.02271000  | 8.83582000  | #Ti |
| 5.05222000  | 0.77581000  | 8.79770000  | #Ti |
| 3.71911000  | 0.80173000  | 5.38735000  | #Ti |
| 5.20091000  | 4.05351000  | 5.62151000  | #Ti |
| 3.71791000  | 4.01774000  | 2.41985000  | #Ti |
| 5.19560000  | 0.77037000  | 2.01972000  | #Ti |
| 6.66739000  | 3.93188000  | 15.28217000 | #Ti |
| 8.16082000  | 0.75061000  | 15.53810000 | #Ti |
| 6.68443000  | 0.80673000  | 12.19911000 | #Ti |
| 8.15951000  | 4.09536000  | 12.14363000 | #Ti |
| 6.64938000  | 4.01661000  | 8.89512000  | #Ti |
| 8.01278000  | 0.77348000  | 8.78312000  | #Ti |
| 6.67108000  | 0.79291000  | 5.38190000  | #Ti |
| 8.14843000  | 4.04157000  | 5.62901000  | #Ti |
| 6.67633000  | 4.01611000  | 2.41744000  | #Ti |
| 8.15546000  | 0.77106000  | 2.01882000  | #Ti |
| 9.61452000  | 4.04533000  | 15.36539000 | #Ti |
| 11.11450000 | 0.77904000  | 15.57150000 | #Ti |

|             |             |             |     |
|-------------|-------------|-------------|-----|
| 9.62055000  | 0.80042000  | 12.20709000 | #Ti |
| 11.07083000 | 4.03043000  | 12.04472000 | #Ti |
| 9.60303000  | 4.02200000  | 8.85885000  | #Ti |
| 10.97114000 | 0.77431000  | 8.79582000  | #Ti |
| 9.63043000  | 0.79444000  | 5.38273000  | #Ti |
| 11.10921000 | 4.05245000  | 5.62102000  | #Ti |
| 9.63455000  | 4.01819000  | 2.41895000  | #Ti |
| 11.11418000 | 0.77076000  | 2.02192000  | #Ti |
| 3.70983000  | 10.53405000 | 15.18966000 | #Ti |
| 5.24299000  | 7.28398000  | 15.55792000 | #Ti |
| 3.72273000  | 7.29309000  | 12.28173000 | #Ti |
| 5.18897000  | 10.57421000 | 11.98887000 | #Ti |
| 3.67094000  | 10.51256000 | 8.79288000  | #Ti |
| 5.09827000  | 7.26285000  | 8.69364000  | #Ti |
| 3.70907000  | 7.29183000  | 5.33845000  | #Ti |
| 5.19237000  | 10.54012000 | 5.58525000  | #Ti |
| 3.71725000  | 10.51183000 | 2.39190000  | #Ti |
| 5.18972000  | 7.25999000  | 1.96781000  | #Ti |
| 6.67673000  | 10.49495000 | 15.18008000 | #Ti |
| 8.17501000  | 7.26095000  | 15.22294000 | #Ti |
| 6.64999000  | 7.31045000  | 11.97917000 | #Ti |
| 8.15092000  | 10.53683000 | 11.99496000 | #Ti |
| 6.63012000  | 10.51820000 | 8.79414000  | #Ti |
| 8.11777000  | 7.26228000  | 8.67428000  | #Ti |
| 6.67492000  | 7.28728000  | 5.30514000  | #Ti |
| 8.15113000  | 10.54285000 | 5.58592000  | #Ti |
| 6.67615000  | 10.51016000 | 2.39018000  | #Ti |
| 8.15456000  | 7.25929000  | 1.95397000  | #Ti |
| 9.63577000  | 10.51212000 | 15.18688000 | #Ti |
| 11.04687000 | 7.27116000  | 15.64425000 | #Ti |
| 9.65961000  | 7.30926000  | 11.95110000 | #Ti |
| 11.11070000 | 10.57128000 | 11.99656000 | #Ti |
| 9.59064000  | 10.50997000 | 8.79613000  | #Ti |
| 11.15314000 | 7.25994000  | 8.67034000  | #Ti |
| 9.63179000  | 7.28539000  | 5.30565000  | #Ti |
| 11.10878000 | 10.53931000 | 5.58667000  | #Ti |
| 9.63523000  | 10.51106000 | 2.39014000  | #Ti |
| 11.12007000 | 7.25950000  | 1.96527000  | #Ti |
| 0.75074000  | 4.01353000  | 15.17388000 | #Ti |
| 2.23597000  | 0.80205000  | 15.57709000 | #Ti |
| 0.76686000  | 0.79803000  | 12.21506000 | #Ti |
| 2.25937000  | 4.07185000  | 12.02549000 | #Ti |
| 0.73003000  | 4.01244000  | 8.86574000  | #Ti |
| 2.09539000  | 0.77518000  | 8.79103000  | #Ti |
| 0.74831000  | 0.79899000  | 5.38843000  | #Ti |
| 2.23145000  | 4.04200000  | 5.61898000  | #Ti |
| 0.75849000  | 4.01674000  | 2.41697000  | #Ti |
| 2.23755000  | 0.77132000  | 2.02479000  | #Ti |
| 0.75513000  | 10.52279000 | 15.19624000 | #Ti |
| 2.22037000  | 7.28724000  | 15.64372000 | #Ti |
| 0.74071000  | 7.28842000  | 12.30971000 | #Ti |
| 2.23060000  | 10.51585000 | 11.99673000 | #Ti |
| 0.71352000  | 10.51827000 | 8.79500000  | #Ti |
| 2.20143000  | 7.26217000  | 8.90985000  | #Ti |
| 0.76398000  | 7.29177000  | 5.33161000  | #Ti |

|            |             |            |     |
|------------|-------------|------------|-----|
| 2.23307000 | 10.55874000 | 5.58764000 | #Ti |
| 0.75878000 | 10.51007000 | 2.39239000 | #Ti |
| 2.23998000 | 7.25895000  | 1.97954000 | #Ti |

Rut-Met-C

1.000000000

11.834800 0.000000 0.000000

0.000000 12.992946 0.000000

0.000000 0.000000 30.000000

H C N O S Ti

11 5 1 162 1 80

Cartesian

|            |            |             |    |
|------------|------------|-------------|----|
| 5.85442000 | 6.48389000 | 19.54594000 | #H |
| 5.52234000 | 6.23851000 | 17.84905000 | #H |
| 4.29758000 | 4.65477000 | 20.18863000 | #H |
| 3.54133000 | 5.92253000 | 19.18418000 | #H |
| 1.49041000 | 4.90681000 | 18.01879000 | #H |
| 1.38962000 | 3.09054000 | 17.91806000 | #H |
| 1.70557000 | 3.88594000 | 19.48220000 | #H |
| 6.06235000 | 3.14029000 | 17.80350000 | #H |
| 7.65998000 | 3.19723000 | 17.71520000 | #H |
| 7.71098000 | 5.50563000 | 18.47161000 | #H |
| 7.17058000 | 2.64201000 | 21.09705000 | #H |
| 5.62648000 | 5.71121000 | 18.79556000 | #C |
| 4.28037000 | 5.10844000 | 19.18405000 | #C |
| 1.87682000 | 3.94852000 | 18.39956000 | #C |
| 6.88069000 | 4.82262000 | 18.71060000 | #C |
| 7.18727000 | 4.25485000 | 20.10012000 | #C |
| 6.83306000 | 3.79759000 | 17.63495000 | #N |
| 7.54630000 | 4.93239000 | 21.04308000 | #O |
| 6.97029000 | 2.90954000 | 20.17492000 | #O |
| 0.91863000 | 0.88867000 | 16.61505000 | #O |
| 2.36435000 | 5.35679000 | 15.44877000 | #O |
| 2.36865000 | 2.89289000 | 15.44274000 | #O |
| 0.91074000 | 0.86715000 | 14.02968000 | #O |
| 0.90167000 | 4.11461000 | 13.30256000 | #O |
| 2.39783000 | 2.15989000 | 12.04719000 | #O |
| 2.39539000 | 6.06562000 | 12.05539000 | #O |
| 0.92972000 | 4.11737000 | 10.74774000 | #O |
| 0.92519000 | 0.84650000 | 10.05155000 | #O |
| 2.39850000 | 5.35247000 | 8.74894000  | #O |
| 2.40085000 | 2.84598000 | 8.76713000  | #O |
| 0.92344000 | 0.85564000 | 7.44337000  | #O |
| 0.91626000 | 4.07592000 | 6.75278000  | #O |
| 2.39950000 | 2.12757000 | 5.44042000  | #O |
| 2.39892000 | 6.02572000 | 5.45416000  | #O |
| 0.91844000 | 4.08353000 | 4.18139000  | #O |
| 0.91862000 | 0.81109000 | 3.46196000  | #O |
| 2.39671000 | 5.28687000 | 2.01550000  | #O |
| 2.39966000 | 2.84729000 | 2.03788000  | #O |
| 0.91656000 | 0.82807000 | 0.88121000  | #O |
| 3.87302000 | 0.88640000 | 16.59683000 | #O |
| 5.35119000 | 5.35956000 | 15.47227000 | #O |
| 5.33480000 | 2.88306000 | 15.41063000 | #O |

|            |             |             |    |
|------------|-------------|-------------|----|
| 3.87120000 | 0.84212000  | 14.02428000 | #O |
| 3.85645000 | 4.12515000  | 13.36399000 | #O |
| 5.35472000 | 2.15573000  | 12.07186000 | #O |
| 5.35210000 | 6.06641000  | 12.06697000 | #O |
| 3.89750000 | 4.11173000  | 10.78295000 | #O |
| 3.88582000 | 0.84548000  | 10.05820000 | #O |
| 5.35622000 | 5.35214000  | 8.75067000  | #O |
| 5.35223000 | 2.84484000  | 8.77018000  | #O |
| 3.88170000 | 0.84824000  | 7.44616000  | #O |
| 3.87456000 | 4.07323000  | 6.76281000  | #O |
| 5.35653000 | 2.12717000  | 5.44222000  | #O |
| 5.35628000 | 6.02638000  | 5.45536000  | #O |
| 3.87704000 | 4.08383000  | 4.18521000  | #O |
| 3.87771000 | 0.80666000  | 3.46229000  | #O |
| 5.35697000 | 5.28601000  | 2.01686000  | #O |
| 5.35434000 | 2.84651000  | 2.04217000  | #O |
| 3.87618000 | 0.82722000  | 0.88020000  | #O |
| 6.83090000 | 0.91637000  | 16.59785000 | #O |
| 8.33907000 | 5.34609000  | 15.51435000 | #O |
| 8.35522000 | 2.88537000  | 15.43187000 | #O |
| 6.83987000 | 0.83588000  | 14.02416000 | #O |
| 6.84522000 | 4.12292000  | 13.38160000 | #O |
| 8.31598000 | 2.15720000  | 12.05723000 | #O |
| 8.31926000 | 6.06518000  | 12.05879000 | #O |
| 6.81749000 | 4.11210000  | 10.79145000 | #O |
| 6.84537000 | 0.84750000  | 10.05859000 | #O |
| 8.30591000 | 5.35177000  | 8.74972000  | #O |
| 8.30908000 | 2.84579000  | 8.76693000  | #O |
| 6.83816000 | 0.85136000  | 7.44785000  | #O |
| 6.83301000 | 4.07470000  | 6.76612000  | #O |
| 8.31631000 | 2.12730000  | 5.44342000  | #O |
| 8.31474000 | 6.02626000  | 5.45777000  | #O |
| 6.83466000 | 4.08280000  | 4.18866000  | #O |
| 6.83664000 | 0.80957000  | 3.46280000  | #O |
| 8.31308000 | 5.28649000  | 2.01749000  | #O |
| 8.31572000 | 2.84714000  | 2.04007000  | #O |
| 6.83453000 | 0.82960000  | 0.88144000  | #O |
| 0.92706000 | 7.36537000  | 16.61852000 | #O |
| 2.39007000 | 11.84011000 | 15.48005000 | #O |
| 2.39950000 | 9.40709000  | 15.49292000 | #O |
| 0.91411000 | 7.38548000  | 14.03201000 | #O |
| 0.91582000 | 10.60513000 | 13.32504000 | #O |
| 2.39508000 | 8.66486000  | 12.03056000 | #O |
| 2.39158000 | 12.55087000 | 12.05003000 | #O |
| 0.91328000 | 10.61268000 | 10.74681000 | #O |
| 0.92286000 | 7.34906000  | 10.04686000 | #O |
| 2.39595000 | 11.84709000 | 8.73518000  | #O |
| 2.39780000 | 9.34128000  | 8.75508000  | #O |
| 0.92440000 | 7.34878000  | 7.43911000  | #O |
| 0.91673000 | 10.56838000 | 6.74216000  | #O |
| 2.39964000 | 8.62625000  | 5.43461000  | #O |
| 2.39858000 | 12.51979000 | 5.45724000  | #O |
| 0.91826000 | 10.58053000 | 4.16823000  | #O |
| 0.92071000 | 7.31152000  | 3.45757000  | #O |
| 2.39727000 | 11.78332000 | 2.00530000  | #O |

|             |             |             |    |
|-------------|-------------|-------------|----|
| 2.39875000  | 9.34338000  | 2.01699000  | #O |
| 0.91679000  | 7.31843000  | 0.87577000  | #O |
| 3.88804000  | 7.36252000  | 16.58329000 | #O |
| 5.35561000  | 11.83961000 | 15.49416000 | #O |
| 5.35531000  | 9.41350000  | 15.47854000 | #O |
| 3.87716000  | 7.39608000  | 14.01467000 | #O |
| 3.87483000  | 10.60744000 | 13.32289000 | #O |
| 5.35804000  | 8.66608000  | 12.02392000 | #O |
| 5.35367000  | 12.54967000 | 12.04412000 | #O |
| 3.87171000  | 10.61401000 | 10.74607000 | #O |
| 3.88783000  | 7.34768000  | 10.05485000 | #O |
| 5.35525000  | 11.84674000 | 8.73653000  | #O |
| 5.35390000  | 9.34065000  | 8.75689000  | #O |
| 3.88255000  | 7.34559000  | 7.44192000  | #O |
| 3.87606000  | 10.56822000 | 6.74259000  | #O |
| 5.35740000  | 8.62606000  | 5.43318000  | #O |
| 5.35725000  | 12.51959000 | 5.45774000  | #O |
| 3.87684000  | 10.58081000 | 4.16862000  | #O |
| 3.87876000  | 7.31349000  | 3.45561000  | #O |
| 5.35661000  | 11.78178000 | 2.00399000  | #O |
| 5.35559000  | 9.34270000  | 2.01883000  | #O |
| 3.87652000  | 7.31200000  | 0.87342000  | #O |
| 6.82690000  | 7.39266000  | 16.56629000 | #O |
| 8.31651000  | 11.84136000 | 15.48460000 | #O |
| 8.31363000  | 9.40931000  | 15.47924000 | #O |
| 6.83945000  | 7.37924000  | 14.01120000 | #O |
| 6.83271000  | 10.61363000 | 13.32174000 | #O |
| 8.31911000  | 8.66446000  | 12.03695000 | #O |
| 8.32077000  | 12.54964000 | 12.04890000 | #O |
| 6.83565000  | 10.61342000 | 10.74686000 | #O |
| 6.84812000  | 7.34621000  | 10.05572000 | #O |
| 8.31340000  | 11.84723000 | 8.73610000  | #O |
| 8.31401000  | 9.34096000  | 8.75461000  | #O |
| 6.83507000  | 7.34977000  | 7.44620000  | #O |
| 6.83313000  | 10.56914000 | 6.74235000  | #O |
| 8.31607000  | 8.62583000  | 5.43689000  | #O |
| 8.31558000  | 12.51990000 | 5.45824000  | #O |
| 6.83651000  | 10.58060000 | 4.16792000  | #O |
| 6.83740000  | 7.31174000  | 3.45658000  | #O |
| 8.31400000  | 11.78282000 | 2.00490000  | #O |
| 8.31649000  | 9.34312000  | 2.01889000  | #O |
| 6.83701000  | 7.31903000  | 0.87469000  | #O |
| 9.78530000  | 0.88064000  | 16.61144000 | #O |
| 11.27573000 | 5.34888000  | 15.47958000 | #O |
| 11.27062000 | 2.90704000  | 15.49092000 | #O |
| 9.80588000  | 0.85789000  | 14.02990000 | #O |
| 9.81069000  | 4.12345000  | 13.31355000 | #O |
| 11.27145000 | 2.16222000  | 12.02994000 | #O |
| 11.27375000 | 6.06428000  | 12.04406000 | #O |
| 9.76651000  | 4.11664000  | 10.75692000 | #O |
| 9.80040000  | 0.84572000  | 10.05447000 | #O |
| 11.27188000 | 5.35037000  | 8.74546000  | #O |
| 11.26916000 | 2.84655000  | 8.76729000  | #O |
| 9.79778000  | 0.85052000  | 7.44642000  | #O |
| 9.79388000  | 4.07451000  | 6.75692000  | #O |



|             |             |             |     |
|-------------|-------------|-------------|-----|
| 11.27460000 | 2.12820000  | 5.44125000  | #O  |
| 11.27388000 | 6.02618000  | 5.45537000  | #O  |
| 9.79219000  | 4.08450000  | 4.18351000  | #O  |
| 9.79543000  | 0.80896000  | 3.46366000  | #O  |
| 11.27360000 | 5.28658000  | 2.01641000  | #O  |
| 11.27041000 | 2.84789000  | 2.03579000  | #O  |
| 9.79320000  | 0.82541000  | 0.88083000  | #O  |
| 9.78731000  | 7.37800000  | 16.61501000 | #O  |
| 11.27656000 | 11.84048000 | 15.48345000 | #O  |
| 11.27259000 | 9.40255000  | 15.49438000 | #O  |
| 9.79906000  | 7.37347000  | 14.03466000 | #O  |
| 9.79539000  | 10.60440000 | 13.32596000 | #O  |
| 11.27301000 | 8.66415000  | 12.03975000 | #O  |
| 11.27414000 | 12.55126000 | 12.05047000 | #O  |
| 9.79321000  | 10.61078000 | 10.74648000 | #O  |
| 9.80014000  | 7.34949000  | 10.05283000 | #O  |
| 11.27223000 | 11.84672000 | 8.73492000  | #O  |
| 11.27035000 | 9.34154000  | 8.75487000  | #O  |
| 9.79612000  | 7.34312000  | 7.44672000  | #O  |
| 9.79326000  | 10.56849000 | 6.74343000  | #O  |
| 11.27488000 | 8.62581000  | 5.43662000  | #O  |
| 11.27414000 | 12.51979000 | 5.45821000  | #O  |
| 9.79395000  | 10.58049000 | 4.16929000  | #O  |
| 9.79498000  | 7.31283000  | 3.46054000  | #O  |
| 11.27409000 | 11.78268000 | 2.00531000  | #O  |
| 11.27225000 | 9.34336000  | 2.01976000  | #O  |
| 9.79556000  | 7.31162000  | 0.87697000  | #O  |
| 3.64087000  | 3.81816000  | 18.06026000 | #S  |
| 0.90667000  | 4.13289000  | 15.10043000 | #Ti |
| 2.38838000  | 0.86981000  | 15.50286000 | #Ti |
| 0.90596000  | 0.84656000  | 12.15466000 | #Ti |
| 2.41950000  | 4.08331000  | 11.95976000 | #Ti |
| 0.86716000  | 4.09600000  | 8.75192000  | #Ti |
| 2.24881000  | 0.85346000  | 8.74296000  | #Ti |
| 0.91357000  | 0.79097000  | 5.33063000  | #Ti |
| 2.40020000  | 4.03290000  | 5.56472000  | #Ti |
| 0.91756000  | 4.06883000  | 2.37070000  | #Ti |
| 2.39485000  | 0.82243000  | 1.96779000  | #Ti |
| 3.86110000  | 4.12258000  | 15.23891000 | #Ti |
| 5.34627000  | 0.87167000  | 15.48972000 | #Ti |
| 3.86663000  | 0.83551000  | 12.14151000 | #Ti |
| 5.36573000  | 4.07662000  | 12.09346000 | #Ti |
| 3.82868000  | 4.10298000  | 8.80734000  | #Ti |
| 5.20877000  | 0.85076000  | 8.74177000  | #Ti |
| 3.87272000  | 0.79462000  | 5.32825000  | #Ti |
| 5.35187000  | 4.03742000  | 5.58201000  | #Ti |
| 3.87676000  | 4.07205000  | 2.37395000  | #Ti |
| 5.35363000  | 0.82155000  | 1.96749000  | #Ti |
| 6.82706000  | 4.15638000  | 15.34948000 | #Ti |
| 8.31029000  | 0.87584000  | 15.49626000 | #Ti |
| 6.82651000  | 0.82733000  | 12.14327000 | #Ti |
| 8.26281000  | 4.07948000  | 12.01956000 | #Ti |
| 6.77938000  | 4.09496000  | 8.81335000  | #Ti |
| 8.16903000  | 0.85123000  | 8.74392000  | #Ti |
| 6.82930000  | 0.79776000  | 5.32859000  | #Ti |

|             |             |             |     |
|-------------|-------------|-------------|-----|
| 8.30406000  | 4.03576000  | 5.57556000  | #Ti |
| 6.83454000  | 4.06793000  | 2.37784000  | #Ti |
| 8.31357000  | 0.82177000  | 1.96857000  | #Ti |
| 0.91269000  | 10.61409000 | 15.13715000 | #Ti |
| 2.40041000  | 7.37927000  | 15.50657000 | #Ti |
| 0.90842000  | 7.34341000  | 12.16325000 | #Ti |
| 2.38820000  | 10.58451000 | 11.94198000 | #Ti |
| 0.85903000  | 10.59402000 | 8.74375000  | #Ti |
| 2.24540000  | 7.34457000  | 8.73981000  | #Ti |
| 0.91334000  | 7.28531000  | 5.32812000  | #Ti |
| 2.39174000  | 10.52974000 | 5.54456000  | #Ti |
| 0.91829000  | 10.56506000 | 2.35349000  | #Ti |
| 2.39429000  | 7.31367000  | 1.96162000  | #Ti |
| 3.86929000  | 10.63248000 | 15.13235000 | #Ti |
| 5.34965000  | 7.42092000  | 15.43488000 | #Ti |
| 3.86526000  | 7.33373000  | 12.11154000 | #Ti |
| 5.34845000  | 10.57382000 | 11.93848000 | #Ti |
| 3.81688000  | 10.59658000 | 8.74308000  | #Ti |
| 5.21295000  | 7.34646000  | 8.72576000  | #Ti |
| 3.87223000  | 7.28989000  | 5.31875000  | #Ti |
| 5.35029000  | 10.53317000 | 5.54362000  | #Ti |
| 3.87691000  | 10.56757000 | 2.35385000  | #Ti |
| 5.35466000  | 7.31315000  | 1.95751000  | #Ti |
| 6.84006000  | 10.63633000 | 15.13128000 | #Ti |
| 8.31489000  | 7.38990000  | 15.49910000 | #Ti |
| 6.82921000  | 7.33015000  | 12.11510000 | #Ti |
| 8.30993000  | 10.57775000 | 11.94269000 | #Ti |
| 6.77725000  | 10.59392000 | 8.74370000  | #Ti |
| 8.17612000  | 7.34526000  | 8.73420000  | #Ti |
| 6.83058000  | 7.29028000  | 5.31804000  | #Ti |
| 8.30927000  | 10.53171000 | 5.54556000  | #Ti |
| 6.83583000  | 10.56396000 | 2.35342000  | #Ti |
| 8.31619000  | 7.31363000  | 1.96209000  | #Ti |
| 9.79664000  | 4.11519000  | 15.11519000 | #Ti |
| 11.26467000 | 0.87940000  | 15.52384000 | #Ti |
| 9.78589000  | 0.84414000  | 12.15246000 | #Ti |
| 11.26037000 | 4.08971000  | 11.90270000 | #Ti |
| 9.73531000  | 4.10255000  | 8.77979000  | #Ti |
| 11.12586000 | 0.85308000  | 8.74858000  | #Ti |
| 9.78695000  | 0.79211000  | 5.33220000  | #Ti |
| 11.26404000 | 4.03004000  | 5.55638000  | #Ti |
| 9.79246000  | 4.07244000  | 2.37161000  | #Ti |
| 11.27111000 | 0.82267000  | 1.96960000  | #Ti |
| 9.79893000  | 10.62157000 | 15.13740000 | #Ti |
| 11.27121000 | 7.36476000  | 15.53454000 | #Ti |
| 9.78774000  | 7.33647000  | 12.15754000 | #Ti |
| 11.26659000 | 10.58573000 | 11.94450000 | #Ti |
| 9.73657000  | 10.59637000 | 8.74442000  | #Ti |
| 11.12799000 | 7.34378000  | 8.75402000  | #Ti |
| 9.78995000  | 7.28807000  | 5.32846000  | #Ti |
| 11.26776000 | 10.52948000 | 5.54468000  | #Ti |
| 9.79426000  | 10.56811000 | 2.35461000  | #Ti |
| 11.27334000 | 7.31403000  | 1.96719000  | #Ti |

Rut-Phe-Z

1.00000000

11.834800 0.000000 0.000000  
0.000000 12.992946 0.000000  
0.000000 0.000000 30.000000

H C N O Ti

11 9 1 162 80

Cartesian

|            |            |             |    |
|------------|------------|-------------|----|
| 7.08310000 | 4.00182000 | 20.36329000 | #H |
| 7.41520000 | 5.51066000 | 21.20628000 | #H |
| 4.98910000 | 3.72625000 | 19.10893000 | #H |
| 6.06172000 | 7.57712000 | 20.74009000 | #H |
| 2.69943000 | 4.56078000 | 18.66709000 | #H |
| 3.80029000 | 8.42752000 | 20.22487000 | #H |
| 2.10723000 | 6.92725000 | 19.17131000 | #H |
| 9.19341000 | 5.23142000 | 19.70126000 | #H |
| 9.01092000 | 7.05948000 | 18.07215000 | #H |
| 7.37061000 | 7.05854000 | 18.12983000 | #H |
| 8.22470000 | 7.49086000 | 19.55503000 | #H |
| 7.09495000 | 5.09454000 | 20.23673000 | #C |
| 5.70311000 | 5.59921000 | 19.92501000 | #C |
| 4.73144000 | 4.75741000 | 19.35436000 | #C |
| 5.34047000 | 6.91819000 | 20.24718000 | #C |
| 3.44437000 | 5.22882000 | 19.10280000 | #C |
| 4.05766000 | 7.39595000 | 19.98167000 | #C |
| 3.10420000 | 6.55138000 | 19.40396000 | #C |
| 8.20761000 | 4.60666000 | 17.91730000 | #C |
| 8.21882000 | 5.40982000 | 19.22677000 | #C |
| 8.20739000 | 6.83918000 | 18.76627000 | #N |
| 9.34945000 | 4.37391000 | 17.40764000 | #O |
| 7.07831000 | 4.35584000 | 17.39482000 | #O |
| 3.78177000 | 0.95005000 | 16.64324000 | #O |
| 5.22983000 | 5.44491000 | 15.44667000 | #O |
| 5.22789000 | 2.97908000 | 15.48871000 | #O |
| 3.78052000 | 0.95145000 | 14.05574000 | #O |
| 3.76242000 | 4.19290000 | 13.33186000 | #O |
| 5.25247000 | 2.23620000 | 12.05330000 | #O |
| 5.25719000 | 6.15776000 | 12.08282000 | #O |
| 3.78874000 | 4.20482000 | 10.76734000 | #O |
| 3.78220000 | 0.92470000 | 10.06052000 | #O |
| 5.26445000 | 5.44188000 | 8.76635000  | #O |
| 5.25911000 | 2.93363000 | 8.77817000  | #O |
| 3.78888000 | 0.93691000 | 7.45481000  | #O |
| 3.77728000 | 4.18404000 | 6.76955000  | #O |
| 5.25783000 | 2.22857000 | 5.46044000  | #O |
| 5.26157000 | 6.12956000 | 5.45137000  | #O |
| 3.77722000 | 4.18118000 | 4.19660000  | #O |
| 3.77877000 | 0.91247000 | 3.48546000  | #O |
| 5.25767000 | 5.39063000 | 2.02792000  | #O |
| 5.25726000 | 2.95012000 | 2.05085000  | #O |
| 3.77479000 | 0.92517000 | 0.90504000  | #O |
| 6.74799000 | 0.98773000 | 16.62360000 | #O |
| 8.21784000 | 5.46098000 | 15.24374000 | #O |
| 8.22069000 | 2.94422000 | 15.32289000 | #O |
| 6.71717000 | 0.91100000 | 14.04253000 | #O |

|             |             |             |    |
|-------------|-------------|-------------|----|
| 6.69981000  | 4.17721000  | 13.37040000 | #O |
| 8.21821000  | 2.22932000  | 12.08432000 | #O |
| 8.21950000  | 6.15424000  | 12.11871000 | #O |
| 6.76041000  | 4.20181000  | 10.80278000 | #O |
| 6.74146000  | 0.92510000  | 10.05891000 | #O |
| 8.21253000  | 5.44356000  | 8.76555000  | #O |
| 8.21438000  | 2.93421000  | 8.77975000  | #O |
| 6.74847000  | 0.93500000  | 7.45195000  | #O |
| 6.73447000  | 4.18217000  | 6.77924000  | #O |
| 8.21755000  | 2.22784000  | 5.46545000  | #O |
| 8.21477000  | 6.13165000  | 5.45563000  | #O |
| 6.73899000  | 4.17920000  | 4.20019000  | #O |
| 6.74056000  | 0.91543000  | 3.48227000  | #O |
| 8.21556000  | 5.39246000  | 2.03019000  | #O |
| 8.21513000  | 2.95115000  | 2.05006000  | #O |
| 6.73440000  | 0.92431000  | 0.90352000  | #O |
| 9.68914000  | 0.98427000  | 16.62321000 | #O |
| 11.20895000 | 5.44408000  | 15.45439000 | #O |
| 11.20678000 | 2.97870000  | 15.48982000 | #O |
| 9.71961000  | 0.91181000  | 14.04424000 | #O |
| 9.73386000  | 4.17720000  | 13.37146000 | #O |
| 11.18393000 | 2.23626000  | 12.05446000 | #O |
| 11.18034000 | 6.15747000  | 12.09249000 | #O |
| 9.67271000  | 4.20271000  | 10.80252000 | #O |
| 9.70356000  | 0.92614000  | 10.06439000 | #O |
| 11.16353000 | 5.44107000  | 8.76663000  | #O |
| 11.16803000 | 2.93317000  | 8.77634000  | #O |
| 9.70238000  | 0.93411000  | 7.45786000  | #O |
| 9.69401000  | 4.18207000  | 6.77973000  | #O |
| 11.17579000 | 2.22857000  | 5.46107000  | #O |
| 11.16949000 | 6.12984000  | 5.45754000  | #O |
| 9.69276000  | 4.18036000  | 4.20110000  | #O |
| 9.69704000  | 0.91339000  | 3.48356000  | #O |
| 11.17335000 | 5.39015000  | 2.02829000  | #O |
| 11.17372000 | 2.94992000  | 2.05173000  | #O |
| 9.69291000  | 0.92595000  | 0.90335000  | #O |
| 3.79632000  | 7.47505000  | 16.66217000 | #O |
| 5.25915000  | 11.92285000 | 15.50467000 | #O |
| 5.26053000  | 9.49553000  | 15.54258000 | #O |
| 3.75545000  | 7.47526000  | 14.08026000 | #O |
| 3.78196000  | 10.67542000 | 13.34743000 | #O |
| 5.24938000  | 8.73940000  | 12.04334000 | #O |
| 5.25162000  | 12.62641000 | 12.05787000 | #O |
| 3.77241000  | 10.68809000 | 10.76394000 | #O |
| 3.78145000  | 7.42905000  | 10.02379000 | #O |
| 5.25549000  | 11.92487000 | 8.75104000  | #O |
| 5.26118000  | 9.41761000  | 8.76633000  | #O |
| 3.78901000  | 7.43006000  | 7.44439000  | #O |
| 3.77855000  | 10.65792000 | 6.75768000  | #O |
| 5.26051000  | 8.72215000  | 5.43888000  | #O |
| 5.25939000  | 12.61580000 | 5.46822000  | #O |
| 3.77448000  | 10.66936000 | 4.18351000  | #O |
| 3.77993000  | 7.41677000  | 3.45113000  | #O |
| 5.25704000  | 11.87960000 | 2.02682000  | #O |
| 5.25641000  | 9.43925000  | 2.02132000  | #O |

|             |             |             |    |
|-------------|-------------|-------------|----|
| 3.77412000  | 7.41581000  | 0.86555000  | #O |
| 6.78056000  | 7.41098000  | 16.63646000 | #O |
| 8.21943000  | 11.91647000 | 15.50919000 | #O |
| 8.21829000  | 9.48763000  | 15.51299000 | #O |
| 6.71757000  | 7.52886000  | 14.06393000 | #O |
| 6.73447000  | 10.68268000 | 13.34169000 | #O |
| 8.21935000  | 8.74968000  | 12.04905000 | #O |
| 8.21809000  | 12.63306000 | 12.06497000 | #O |
| 6.73648000  | 10.68829000 | 10.76512000 | #O |
| 6.76242000  | 7.42895000  | 10.07514000 | #O |
| 8.21503000  | 11.92516000 | 8.75638000  | #O |
| 8.21448000  | 9.41795000  | 8.76651000  | #O |
| 6.74178000  | 7.43374000  | 7.46235000  | #O |
| 6.73632000  | 10.65926000 | 6.75746000  | #O |
| 8.21594000  | 8.71906000  | 5.44234000  | #O |
| 8.21706000  | 12.61419000 | 5.46699000  | #O |
| 6.73735000  | 10.67005000 | 4.18049000  | #O |
| 6.74008000  | 7.41985000  | 3.44092000  | #O |
| 8.21544000  | 11.88098000 | 2.02553000  | #O |
| 8.21615000  | 9.44017000  | 2.01660000  | #O |
| 6.73301000  | 7.41391000  | 0.85705000  | #O |
| 9.65464000  | 7.40955000  | 16.65889000 | #O |
| 11.17718000 | 11.92302000 | 15.50284000 | #O |
| 11.17926000 | 9.49459000  | 15.55497000 | #O |
| 9.72796000  | 7.52623000  | 14.08270000 | #O |
| 9.69963000  | 10.68369000 | 13.34356000 | #O |
| 11.18616000 | 8.74099000  | 12.05142000 | #O |
| 11.18568000 | 12.62672000 | 12.05924000 | #O |
| 9.69571000  | 10.69017000 | 10.76607000 | #O |
| 9.68440000  | 7.42740000  | 10.07928000 | #O |
| 11.17322000 | 11.92503000 | 8.75091000  | #O |
| 11.16639000 | 9.41802000  | 8.76951000  | #O |
| 9.68648000  | 7.43277000  | 7.46912000  | #O |
| 9.69296000  | 10.66038000 | 6.75812000  | #O |
| 11.17001000 | 8.72163000  | 5.44122000  | #O |
| 11.17637000 | 12.61626000 | 5.46893000  | #O |
| 9.69272000  | 10.67103000 | 4.18062000  | #O |
| 9.69180000  | 7.41873000  | 3.44232000  | #O |
| 11.17437000 | 11.87927000 | 2.02513000  | #O |
| 11.17448000 | 9.43867000  | 2.02269000  | #O |
| 9.69865000  | 7.41371000  | 0.85742000  | #O |
| 0.82257000  | 0.94553000  | 16.64138000 | #O |
| 2.29947000  | 5.43444000  | 15.51249000 | #O |
| 2.30054000  | 2.98896000  | 15.51057000 | #O |
| 0.82320000  | 0.95252000  | 14.05477000 | #O |
| 0.83724000  | 4.19112000  | 13.33068000 | #O |
| 2.30113000  | 2.23733000  | 12.05125000 | #O |
| 2.29746000  | 6.15141000  | 12.07131000 | #O |
| 0.80761000  | 4.20244000  | 10.76742000 | #O |
| 0.82639000  | 0.92495000  | 10.05659000 | #O |
| 2.29564000  | 5.43786000  | 8.75729000  | #O |
| 2.29801000  | 2.93506000  | 8.77105000  | #O |
| 0.83104000  | 0.93683000  | 7.45130000  | #O |
| 0.81832000  | 4.18207000  | 6.77062000  | #O |
| 2.30047000  | 2.23020000  | 5.46452000  | #O |

|             |             |             |     |
|-------------|-------------|-------------|-----|
| 2.29676000  | 6.13021000  | 5.45533000  | #O  |
| 0.81885000  | 4.18080000  | 4.19724000  | #O  |
| 0.82419000  | 0.91284000  | 3.48511000  | #O  |
| 2.29809000  | 5.39123000  | 2.03000000  | #O  |
| 2.29758000  | 2.95073000  | 2.04952000  | #O  |
| 0.81720000  | 0.92484000  | 0.90555000  | #O  |
| 0.80712000  | 7.45129000  | 16.68896000 | #O  |
| 2.30179000  | 11.92692000 | 15.48570000 | #O  |
| 2.29977000  | 9.49229000  | 15.54302000 | #O  |
| 0.84687000  | 7.48240000  | 14.09210000 | #O  |
| 0.81825000  | 10.67598000 | 13.34831000 | #O  |
| 2.29964000  | 8.74229000  | 12.05689000 | #O  |
| 2.30100000  | 12.63218000 | 12.07761000 | #O  |
| 0.82375000  | 10.68843000 | 10.76418000 | #O  |
| 0.81005000  | 7.43029000  | 10.03330000 | #O  |
| 2.29713000  | 11.92460000 | 8.75071000  | #O  |
| 2.29551000  | 9.42161000  | 8.75645000  | #O  |
| 0.80642000  | 7.43085000  | 7.45817000  | #O  |
| 0.81442000  | 10.65710000 | 6.75789000  | #O  |
| 2.29629000  | 8.71772000  | 5.44590000  | #O  |
| 2.30009000  | 12.61249000 | 5.47263000  | #O  |
| 0.81975000  | 10.67025000 | 4.18293000  | #O  |
| 0.81602000  | 7.41554000  | 3.45239000  | #O  |
| 2.29821000  | 11.87967000 | 2.02576000  | #O  |
| 2.29828000  | 9.43965000  | 2.02500000  | #O  |
| 0.82360000  | 7.41454000  | 0.86628000  | #O  |
| 3.77690000  | 4.22048000  | 15.13970000 | #Ti |
| 5.25699000  | 0.94810000  | 15.54237000 | #Ti |
| 3.75779000  | 0.94835000  | 12.18973000 | #Ti |
| 5.30124000  | 4.16702000  | 12.01618000 | #Ti |
| 3.75304000  | 4.18157000  | 8.79655000  | #Ti |
| 5.11378000  | 0.93612000  | 8.77399000  | #Ti |
| 3.77853000  | 0.92976000  | 5.35956000  | #Ti |
| 5.26322000  | 4.18399000  | 5.59097000  | #Ti |
| 3.77771000  | 4.16968000  | 2.38820000  | #Ti |
| 5.25176000  | 0.92229000  | 1.99243000  | #Ti |
| 6.73401000  | 4.18845000  | 15.35000000 | #Ti |
| 8.21974000  | 0.94180000  | 15.52193000 | #Ti |
| 6.75068000  | 0.95212000  | 12.17995000 | #Ti |
| 8.21417000  | 4.24394000  | 12.17621000 | #Ti |
| 6.71338000  | 4.18090000  | 8.85689000  | #Ti |
| 8.07271000  | 0.93383000  | 8.75469000  | #Ti |
| 6.73033000  | 0.93307000  | 5.35413000  | #Ti |
| 8.21277000  | 4.17856000  | 5.60832000  | #Ti |
| 6.73680000  | 4.17000000  | 2.39200000  | #Ti |
| 8.21066000  | 0.92239000  | 1.99289000  | #Ti |
| 9.69677000  | 4.19536000  | 15.35527000 | #Ti |
| 11.18096000 | 0.95112000  | 15.54269000 | #Ti |
| 9.67707000  | 0.95239000  | 12.18229000 | #Ti |
| 11.12548000 | 4.17060000  | 12.01964000 | #Ti |
| 9.66062000  | 4.18458000  | 8.85836000  | #Ti |
| 11.03124000 | 0.93545000  | 8.77294000  | #Ti |
| 9.68861000  | 0.93278000  | 5.35680000  | #Ti |
| 11.16223000 | 4.18463000  | 5.59310000  | #Ti |
| 9.69383000  | 4.17001000  | 2.39268000  | #Ti |

|             |             |             |     |
|-------------|-------------|-------------|-----|
| 11.16890000 | 0.92219000  | 1.99269000  | #Ti |
| 3.77722000  | 10.69959000 | 15.16546000 | #Ti |
| 5.31490000  | 7.45458000  | 15.58913000 | #Ti |
| 3.79116000  | 7.44233000  | 12.27361000 | #Ti |
| 5.25146000  | 10.72572000 | 11.96696000 | #Ti |
| 3.73395000  | 10.67735000 | 8.76971000  | #Ti |
| 5.16184000  | 7.42430000  | 8.66798000  | #Ti |
| 3.76795000  | 7.42384000  | 5.31803000  | #Ti |
| 5.25339000  | 10.67073000 | 5.56170000  | #Ti |
| 3.77675000  | 10.66331000 | 2.36999000  | #Ti |
| 5.25092000  | 7.41255000  | 1.94826000  | #Ti |
| 6.73775000  | 10.69111000 | 15.15695000 | #Ti |
| 8.21382000  | 7.45450000  | 15.19896000 | #Ti |
| 6.70632000  | 7.45486000  | 11.94976000 | #Ti |
| 8.21276000  | 10.67077000 | 11.97232000 | #Ti |
| 6.69270000  | 10.67786000 | 8.77206000  | #Ti |
| 8.18689000  | 7.42730000  | 8.65053000  | #Ti |
| 6.73515000  | 7.42591000  | 5.28583000  | #Ti |
| 8.21135000  | 10.67946000 | 5.56326000  | #Ti |
| 6.73591000  | 10.66358000 | 2.36734000  | #Ti |
| 8.21495000  | 7.41308000  | 1.93274000  | #Ti |
| 9.69914000  | 10.68906000 | 15.15888000 | #Ti |
| 11.11449000 | 7.45657000  | 15.60322000 | #Ti |
| 9.72501000  | 7.45480000  | 11.94065000 | #Ti |
| 11.17405000 | 10.72471000 | 11.96909000 | #Ti |
| 9.65358000  | 10.67607000 | 8.77351000  | #Ti |
| 11.21765000 | 7.42451000  | 8.65631000  | #Ti |
| 9.69169000  | 7.42581000  | 5.28512000  | #Ti |
| 11.16844000 | 10.67110000 | 5.56209000  | #Ti |
| 9.69437000  | 10.66379000 | 2.36734000  | #Ti |
| 11.18082000 | 7.41213000  | 1.94644000  | #Ti |
| 0.82163000  | 4.21432000  | 15.13639000 | #Ti |
| 2.30194000  | 0.97809000  | 15.55396000 | #Ti |
| 0.83226000  | 0.95003000  | 12.18819000 | #Ti |
| 2.29709000  | 4.22758000  | 11.93450000 | #Ti |
| 0.78578000  | 4.17735000  | 8.80047000  | #Ti |
| 2.15587000  | 0.93652000  | 8.75929000  | #Ti |
| 0.80571000  | 0.93058000  | 5.35759000  | #Ti |
| 2.29474000  | 4.16555000  | 5.57858000  | #Ti |
| 0.81815000  | 4.16954000  | 2.38854000  | #Ti |
| 2.29328000  | 0.92163000  | 1.99582000  | #Ti |
| 0.82450000  | 10.70486000 | 15.16643000 | #Ti |
| 2.29429000  | 7.45420000  | 15.62378000 | #Ti |
| 0.80401000  | 7.44450000  | 12.28185000 | #Ti |
| 2.29519000  | 10.65946000 | 11.97280000 | #Ti |
| 0.77712000  | 10.67867000 | 8.77090000  | #Ti |
| 2.26911000  | 7.42313000  | 8.88399000  | #Ti |
| 0.82460000  | 7.42432000  | 5.31485000  | #Ti |
| 2.29316000  | 10.68644000 | 5.56543000  | #Ti |
| 0.81852000  | 10.66322000 | 2.36949000  | #Ti |
| 2.30008000  | 7.41213000  | 1.96237000  | #Ti |

Rut-Phe-D  
1.000000000

11.834800 0.000000 0.000000  
0.000000 12.992946 0.000000  
0.000000 0.000000 30.000000

H C N O Ti

11 9 1 162 80

Cartesian

|            |            |             |    |
|------------|------------|-------------|----|
| 7.07657000 | 3.90575000 | 20.35557000 | #H |
| 7.39902000 | 5.39580000 | 21.23580000 | #H |
| 5.01620000 | 3.64776000 | 19.08223000 | #H |
| 6.06009000 | 7.48834000 | 20.74039000 | #H |
| 2.72500000 | 4.46806000 | 18.63566000 | #H |
| 3.78423000 | 8.32158000 | 20.24720000 | #H |
| 2.10459000 | 6.82133000 | 19.17591000 | #H |
| 9.20390000 | 5.03444000 | 19.75733000 | #H |
| 9.33307000 | 7.16305000 | 17.61079000 | #H |
| 7.53225000 | 7.14965000 | 18.55269000 | #H |
| 8.66212000 | 7.32240000 | 19.76658000 | #H |
| 7.10087000 | 5.00151000 | 20.25104000 | #C |
| 5.71699000 | 5.51415000 | 19.91934000 | #C |
| 4.75328000 | 4.67611000 | 19.33471000 | #C |
| 5.34241000 | 6.82710000 | 20.24801000 | #C |
| 3.46282000 | 5.13987000 | 19.07901000 | #C |
| 4.05216000 | 7.29601000 | 19.98753000 | #C |
| 3.10690000 | 6.45299000 | 19.39963000 | #C |
| 8.22276000 | 4.63390000 | 17.93342000 | #C |
| 8.26117000 | 5.34889000 | 19.28553000 | #C |
| 8.41397000 | 6.78108000 | 18.93630000 | #N |
| 9.35456000 | 4.40120000 | 17.38668000 | #O |
| 7.09489000 | 4.40533000 | 17.38792000 | #O |
| 3.77596000 | 0.96268000 | 16.63840000 | #O |
| 5.22275000 | 5.46445000 | 15.44052000 | #O |
| 5.22536000 | 2.99529000 | 15.49530000 | #O |
| 3.77250000 | 0.97033000 | 14.05095000 | #O |
| 3.75539000 | 4.19903000 | 13.33308000 | #O |
| 5.24566000 | 2.24288000 | 12.04754000 | #O |
| 5.24135000 | 6.16666000 | 12.07840000 | #O |
| 3.78255000 | 4.21084000 | 10.76739000 | #O |
| 3.77753000 | 0.92788000 | 10.05697000 | #O |
| 5.26054000 | 5.44644000 | 8.76299000  | #O |
| 5.25656000 | 2.93736000 | 8.77845000  | #O |
| 3.78693000 | 0.94027000 | 7.45286000  | #O |
| 3.77595000 | 4.18542000 | 6.76918000  | #O |
| 5.25747000 | 2.22988000 | 5.45570000  | #O |
| 5.25916000 | 6.13218000 | 5.45185000  | #O |
| 3.77576000 | 4.18377000 | 4.19637000  | #O |
| 3.77742000 | 0.91115000 | 3.48357000  | #O |
| 5.25815000 | 5.39099000 | 2.02680000  | #O |
| 5.25786000 | 2.94956000 | 2.05478000  | #O |
| 3.77542000 | 0.92839000 | 0.90290000  | #O |
| 6.74168000 | 0.99726000 | 16.61949000 | #O |
| 8.21635000 | 5.47834000 | 15.21966000 | #O |
| 8.21492000 | 2.96205000 | 15.32860000 | #O |
| 6.71233000 | 0.92202000 | 14.03924000 | #O |
| 6.68942000 | 4.18692000 | 13.37412000 | #O |
| 8.21059000 | 2.23811000 | 12.08448000 | #O |



|             |             |             |    |
|-------------|-------------|-------------|----|
| 8.20346000  | 6.16765000  | 12.11941000 | #O |
| 6.75441000  | 4.21040000  | 10.80512000 | #O |
| 6.73721000  | 0.92952000  | 10.05680000 | #O |
| 8.20875000  | 5.44778000  | 8.76154000  | #O |
| 8.21011000  | 2.93816000  | 8.77886000  | #O |
| 6.74643000  | 0.93850000  | 7.45051000  | #O |
| 6.73310000  | 4.18344000  | 6.77915000  | #O |
| 8.21617000  | 2.22911000  | 5.46293000  | #O |
| 8.21471000  | 6.13399000  | 5.45541000  | #O |
| 6.73860000  | 4.18245000  | 4.20059000  | #O |
| 6.73935000  | 0.91270000  | 3.48035000  | #O |
| 8.21581000  | 5.39252000  | 2.02908000  | #O |
| 8.21636000  | 2.95078000  | 2.05412000  | #O |
| 6.73544000  | 0.92689000  | 0.90161000  | #O |
| 9.68291000  | 0.99759000  | 16.61991000 | #O |
| 11.20807000 | 5.46309000  | 15.44088000 | #O |
| 11.20019000 | 2.99229000  | 15.48708000 | #O |
| 9.71343000  | 0.92400000  | 14.04019000 | #O |
| 9.73138000  | 4.18786000  | 13.36659000 | #O |
| 11.17700000 | 2.24350000  | 12.04604000 | #O |
| 11.17319000 | 6.16663000  | 12.08153000 | #O |
| 9.66180000  | 4.21007000  | 10.80208000 | #O |
| 9.69995000  | 0.92954000  | 10.06225000 | #O |
| 11.15816000 | 5.44595000  | 8.76598000  | #O |
| 11.16556000 | 2.93768000  | 8.77846000  | #O |
| 9.70064000  | 0.93942000  | 7.45643000  | #O |
| 9.69356000  | 4.18341000  | 6.77943000  | #O |
| 11.17493000 | 2.22986000  | 5.45765000  | #O |
| 11.16772000 | 6.13215000  | 5.45339000  | #O |
| 9.69180000  | 4.18273000  | 4.20075000  | #O |
| 9.69645000  | 0.91174000  | 3.48168000  | #O |
| 11.17361000 | 5.39032000  | 2.02665000  | #O |
| 11.17472000 | 2.94949000  | 2.05607000  | #O |
| 9.69392000  | 0.92906000  | 0.90141000  | #O |
| 3.79172000  | 7.49254000  | 16.66230000 | #O |
| 5.24917000  | 11.93744000 | 15.49659000 | #O |
| 5.25723000  | 9.50819000  | 15.53799000 | #O |
| 3.73124000  | 7.49300000  | 14.07961000 | #O |
| 3.77354000  | 10.68140000 | 13.34441000 | #O |
| 5.23550000  | 8.74796000  | 12.03682000 | #O |
| 5.24272000  | 12.63502000 | 12.05771000 | #O |
| 3.76502000  | 10.69547000 | 10.76067000 | #O |
| 3.77719000  | 7.43425000  | 10.02424000 | #O |
| 5.25271000  | 11.92813000 | 8.74717000  | #O |
| 5.25700000  | 9.42043000  | 8.76446000  | #O |
| 3.77974000  | 7.43435000  | 7.44841000  | #O |
| 3.77802000  | 10.65672000 | 6.75349000  | #O |
| 5.25869000  | 8.72220000  | 5.43574000  | #O |
| 5.25857000  | 12.61666000 | 5.46809000  | #O |
| 3.77432000  | 10.67113000 | 4.17859000  | #O |
| 3.77897000  | 7.41811000  | 3.44632000  | #O |
| 5.25639000  | 11.87962000 | 2.01970000  | #O |
| 5.25728000  | 9.43881000  | 2.01659000  | #O |
| 3.77494000  | 7.41520000  | 0.86071000  | #O |
| 6.80329000  | 7.43273000  | 16.58723000 | #O |

|             |             |             |    |
|-------------|-------------|-------------|----|
| 8.21757000  | 11.92770000 | 15.50678000 | #O |
| 8.21088000  | 9.49656000  | 15.48462000 | #O |
| 6.69106000  | 7.53983000  | 14.04492000 | #O |
| 6.72657000  | 10.69726000 | 13.33712000 | #O |
| 8.20499000  | 8.75905000  | 12.04259000 | #O |
| 8.21122000  | 12.64259000 | 12.05902000 | #O |
| 6.72865000  | 10.69698000 | 10.76158000 | #O |
| 6.74649000  | 7.43118000  | 10.06593000 | #O |
| 8.21187000  | 11.92843000 | 8.74849000  | #O |
| 8.20945000  | 9.42085000  | 8.76657000  | #O |
| 6.73986000  | 7.43754000  | 7.46280000  | #O |
| 6.73495000  | 10.65930000 | 6.75338000  | #O |
| 8.21492000  | 8.71964000  | 5.43770000  | #O |
| 8.21672000  | 12.61515000 | 5.46655000  | #O |
| 6.73667000  | 10.67082000 | 4.17580000  | #O |
| 6.73933000  | 7.42073000  | 3.43729000  | #O |
| 8.21568000  | 11.88035000 | 2.02094000  | #O |
| 8.21670000  | 9.43903000  | 2.01189000  | #O |
| 6.73409000  | 7.41198000  | 0.85250000  | #O |
| 9.65433000  | 7.42477000  | 16.66159000 | #O |
| 11.16943000 | 11.93309000 | 15.49810000 | #O |
| 11.17642000 | 9.50199000  | 15.54288000 | #O |
| 9.72341000  | 7.54556000  | 14.07345000 | #O |
| 9.69297000  | 10.69095000 | 13.33654000 | #O |
| 11.17933000 | 8.74930000  | 12.03901000 | #O |
| 11.17975000 | 12.63455000 | 12.05718000 | #O |
| 9.68993000  | 10.69977000 | 10.76172000 | #O |
| 9.66810000  | 7.43354000  | 10.07943000 | #O |
| 11.17056000 | 11.92832000 | 8.74718000  | #O |
| 11.16245000 | 9.42183000  | 8.76841000  | #O |
| 9.68703000  | 7.43774000  | 7.46595000  | #O |
| 9.69189000  | 10.65945000 | 6.75415000  | #O |
| 11.16887000 | 8.72266000  | 5.43495000  | #O |
| 11.17483000 | 12.61726000 | 5.46923000  | #O |
| 9.69258000  | 10.67201000 | 4.17596000  | #O |
| 9.69151000  | 7.42040000  | 3.43712000  | #O |
| 11.17376000 | 11.87907000 | 2.01861000  | #O |
| 11.17501000 | 9.43839000  | 2.01779000  | #O |
| 9.69943000  | 7.41223000  | 0.85282000  | #O |
| 0.81401000  | 0.95673000  | 16.63621000 | #O |
| 2.29193000  | 5.45103000  | 15.50132000 | #O |
| 2.29582000  | 3.00199000  | 15.51132000 | #O |
| 0.81762000  | 0.96524000  | 14.05018000 | #O |
| 0.83031000  | 4.19407000  | 13.32677000 | #O |
| 2.29376000  | 2.24491000  | 12.04364000 | #O |
| 2.28724000  | 6.16083000  | 12.07334000 | #O |
| 0.80367000  | 4.21150000  | 10.76479000 | #O |
| 0.82342000  | 0.92691000  | 10.05371000 | #O |
| 2.29272000  | 5.44256000  | 8.75523000  | #O |
| 2.29407000  | 2.93909000  | 8.77052000  | #O |
| 0.82748000  | 0.94196000  | 7.44949000  | #O |
| 0.81616000  | 4.18385000  | 6.77003000  | #O |
| 2.29973000  | 2.23147000  | 5.46287000  | #O |
| 2.29608000  | 6.13245000  | 5.45598000  | #O |
| 0.81898000  | 4.18385000  | 4.19701000  | #O |

|             |             |             |     |
|-------------|-------------|-------------|-----|
| 0.82337000  | 0.91102000  | 3.48406000  | #O  |
| 2.29880000  | 5.39174000  | 2.02811000  | #O  |
| 2.29779000  | 2.95072000  | 2.05090000  | #O  |
| 0.81796000  | 0.92625000  | 0.90388000  | #O  |
| 0.79522000  | 7.46598000  | 16.66304000 | #O  |
| 2.29804000  | 11.93713000 | 15.48577000 | #O  |
| 2.29064000  | 9.50126000  | 15.53309000 | #O  |
| 0.80584000  | 7.49323000  | 14.08342000 | #O  |
| 0.80992000  | 10.68716000 | 13.34469000 | #O  |
| 2.28749000  | 8.74890000  | 12.05237000 | #O  |
| 2.29486000  | 12.63902000 | 12.07711000 | #O  |
| 0.81902000  | 10.69624000 | 10.76014000 | #O  |
| 0.80897000  | 7.43515000  | 10.03667000 | #O  |
| 2.29414000  | 11.92792000 | 8.74120000  | #O  |
| 2.29190000  | 9.42525000  | 8.75588000  | #O  |
| 0.79978000  | 7.43411000  | 7.45601000  | #O  |
| 0.81312000  | 10.65681000 | 6.75397000  | #O  |
| 2.29632000  | 8.71879000  | 5.44141000  | #O  |
| 2.29937000  | 12.61355000 | 5.47223000  | #O  |
| 0.81941000  | 10.67192000 | 4.17875000  | #O  |
| 0.81514000  | 7.41625000  | 3.44864000  | #O  |
| 2.29864000  | 11.87985000 | 2.02133000  | #O  |
| 2.29801000  | 9.43945000  | 2.02259000  | #O  |
| 0.82381000  | 7.41429000  | 0.86031000  | #O  |
| 3.77284000  | 4.23538000  | 15.14150000 | #Ti |
| 5.25075000  | 0.96484000  | 15.53959000 | #Ti |
| 3.75649000  | 0.95979000  | 12.18750000 | #Ti |
| 5.30187000  | 4.17863000  | 12.02560000 | #Ti |
| 3.75643000  | 4.18167000  | 8.80017000  | #Ti |
| 5.11165000  | 0.93991000  | 8.77145000  | #Ti |
| 3.77776000  | 0.93729000  | 5.35689000  | #Ti |
| 5.26328000  | 4.19139000  | 5.59214000  | #Ti |
| 3.77815000  | 4.16957000  | 2.38812000  | #Ti |
| 5.25315000  | 0.92205000  | 1.98935000  | #Ti |
| 6.72944000  | 4.20969000  | 15.38776000 | #Ti |
| 8.21292000  | 0.95877000  | 15.51883000 | #Ti |
| 6.74392000  | 0.96005000  | 12.17611000 | #Ti |
| 8.20748000  | 4.24962000  | 12.19890000 | #Ti |
| 6.71636000  | 4.18754000  | 8.86544000  | #Ti |
| 8.07018000  | 0.93817000  | 8.75245000  | #Ti |
| 6.73006000  | 0.93920000  | 5.35049000  | #Ti |
| 8.21193000  | 4.18569000  | 5.61078000  | #Ti |
| 6.73729000  | 4.17020000  | 2.39265000  | #Ti |
| 8.21268000  | 0.92232000  | 1.98971000  | #Ti |
| 9.68950000  | 4.21781000  | 15.38142000 | #Ti |
| 11.17077000 | 0.96308000  | 15.54033000 | #Ti |
| 9.66996000  | 0.96088000  | 12.17755000 | #Ti |
| 11.11349000 | 4.17939000  | 12.01850000 | #Ti |
| 9.66245000  | 4.18512000  | 8.86384000  | #Ti |
| 11.03000000 | 0.94002000  | 8.77003000  | #Ti |
| 9.68885000  | 0.93972000  | 5.35377000  | #Ti |
| 11.16083000 | 4.19196000  | 5.59279000  | #Ti |
| 9.69439000  | 4.16952000  | 2.39294000  | #Ti |
| 11.17083000 | 0.92198000  | 1.99032000  | #Ti |
| 3.77243000  | 10.70506000 | 15.16327000 | #Ti |

|             |             |             |     |
|-------------|-------------|-------------|-----|
| 5.32637000  | 7.47243000  | 15.58515000 | #Ti |
| 3.78067000  | 7.45353000  | 12.26141000 | #Ti |
| 5.24584000  | 10.73237000 | 11.96417000 | #Ti |
| 3.73471000  | 10.68404000 | 8.76571000  | #Ti |
| 5.18314000  | 7.42716000  | 8.64806000  | #Ti |
| 3.76868000  | 7.43043000  | 5.30671000  | #Ti |
| 5.25276000  | 10.67851000 | 5.55677000  | #Ti |
| 3.77685000  | 10.66336000 | 2.36454000  | #Ti |
| 5.25333000  | 7.41187000  | 1.94080000  | #Ti |
| 6.73291000  | 10.71719000 | 15.15330000 | #Ti |
| 8.16839000  | 7.46514000  | 15.16857000 | #Ti |
| 6.69640000  | 7.46049000  | 11.91913000 | #Ti |
| 8.20718000  | 10.67987000 | 11.96668000 | #Ti |
| 6.69337000  | 10.67829000 | 8.76718000  | #Ti |
| 8.21885000  | 7.43032000  | 8.64732000  | #Ti |
| 6.73618000  | 7.43178000  | 5.28130000  | #Ti |
| 8.21080000  | 10.68692000 | 5.55832000  | #Ti |
| 6.73615000  | 10.66331000 | 2.36191000  | #Ti |
| 8.21700000  | 7.41145000  | 1.92765000  | #Ti |
| 9.69133000  | 10.68900000 | 15.15256000 | #Ti |
| 11.18946000 | 7.46831000  | 15.53690000 | #Ti |
| 9.71233000  | 7.46297000  | 11.96067000 | #Ti |
| 11.16862000 | 10.73401000 | 11.96403000 | #Ti |
| 9.65423000  | 10.68285000 | 8.76782000  | #Ti |
| 11.23442000 | 7.42836000  | 8.66540000  | #Ti |
| 9.69249000  | 7.43192000  | 5.27785000  | #Ti |
| 11.16824000 | 10.67907000 | 5.55717000  | #Ti |
| 9.69449000  | 10.66280000 | 2.36200000  | #Ti |
| 11.18218000 | 7.41158000  | 1.94147000  | #Ti |
| 0.81668000  | 4.21733000  | 15.13111000 | #Ti |
| 2.29484000  | 0.98995000  | 15.55282000 | #Ti |
| 0.82305000  | 0.96051000  | 12.18618000 | #Ti |
| 2.29242000  | 4.22805000  | 11.93090000 | #Ti |
| 0.78807000  | 4.18547000  | 8.80086000  | #Ti |
| 2.15388000  | 0.94127000  | 8.75760000  | #Ti |
| 0.80644000  | 0.93752000  | 5.35597000  | #Ti |
| 2.29432000  | 4.17506000  | 5.57906000  | #Ti |
| 0.81845000  | 4.17051000  | 2.38859000  | #Ti |
| 2.29491000  | 0.92250000  | 1.99330000  | #Ti |
| 0.81839000  | 10.72643000 | 15.16287000 | #Ti |
| 2.33018000  | 7.46628000  | 15.60648000 | #Ti |
| 0.79847000  | 7.45421000  | 12.24107000 | #Ti |
| 2.28960000  | 10.68022000 | 11.97032000 | #Ti |
| 0.77803000  | 10.67945000 | 8.76588000  | #Ti |
| 2.29397000  | 7.42660000  | 8.87786000  | #Ti |
| 0.82405000  | 7.43087000  | 5.31125000  | #Ti |
| 2.29298000  | 10.69325000 | 5.56128000  | #Ti |
| 0.81871000  | 10.66402000 | 2.36459000  | #Ti |
| 2.29984000  | 7.41139000  | 1.95530000  | #Ti |

Rut-Phe-C

1.000000000

11.834800 0.000000 0.000000

0.000000 12.992946 0.000000

0.000000 0.000000 30.000000  
 H C N O Ti  
 11 9 1 162 80  
 Cartesian  
 5.71616000 6.12741000 19.74813000 #H  
 5.76305000 6.23012000 18.01075000 #H  
 3.46251000 6.96189000 19.36060000 #H  
 4.50678000 2.91857000 18.23829000 #H  
 1.07369000 6.35189000 19.29787000 #H  
 2.14855000 2.32438000 18.20363000 #H  
 0.39268000 4.00364000 18.74168000 #H  
 6.36619000 2.87853000 17.70805000 #H  
 7.90400000 3.29555000 17.67151000 #H  
 7.69148000 5.22655000 18.86435000 #H  
 6.70964000 2.04766000 20.88884000 #H  
 5.60446000 5.52392000 18.83459000 #C  
 4.18342000 5.01140000 18.78610000 #C  
 3.17333000 5.94317000 19.09808000 #C  
 3.78581000 3.70963000 18.44112000 #C  
 1.82667000 5.59926000 19.06535000 #C  
 2.42811000 3.35069000 18.43538000 #C  
 1.44516000 4.29262000 18.73400000 #C  
 6.80855000 4.56966000 18.83828000 #C  
 6.85221000 3.79340000 20.16134000 #C  
 6.96682000 3.70774000 17.63909000 #N  
 7.00140000 4.32763000 21.24391000 #O  
 6.69525000 2.45110000 19.99564000 #O  
 0.93341000 0.88933000 16.63260000 #O  
 2.40157000 5.35891000 15.53443000 #O  
 2.39570000 2.89514000 15.41976000 #O  
 0.91781000 0.86496000 14.05499000 #O  
 0.91559000 4.16729000 13.35972000 #O  
 2.40714000 2.19714000 12.09459000 #O  
 2.40455000 6.10016000 12.06343000 #O  
 0.93409000 4.14013000 10.78382000 #O  
 0.93064000 0.90805000 10.07768000 #O  
 2.40506000 5.40634000 8.79222000 #O  
 2.40044000 2.90072000 8.78107000 #O  
 0.92864000 0.90256000 7.46750000 #O  
 0.91972000 4.15708000 6.78176000 #O  
 2.40322000 2.20432000 5.47642000 #O  
 2.40194000 6.10163000 5.47010000 #O  
 0.92129000 4.15169000 4.21089000 #O  
 0.92246000 0.90171000 3.48680000 #O  
 2.39994000 5.37021000 2.05765000 #O  
 2.40041000 2.93042000 2.05788000 #O  
 0.91764000 0.90735000 0.90563000 #O  
 3.88356000 0.90103000 16.61813000 #O  
 5.35616000 5.36527000 15.54270000 #O  
 5.34047000 2.89667000 15.44186000 #O  
 3.88541000 0.84591000 14.04377000 #O  
 3.87504000 4.17697000 13.38496000 #O  
 5.36119000 2.19297000 12.10412000 #O  
 5.36393000 6.10195000 12.07172000 #O  
 3.89602000 4.14001000 10.81233000 #O

|            |             |             |    |
|------------|-------------|-------------|----|
| 3.89001000 | 0.90789000  | 10.08038000 | #O |
| 5.35877000 | 5.40717000  | 8.79413000  | #O |
| 5.36192000 | 2.89989000  | 8.78436000  | #O |
| 3.88655000 | 0.90182000  | 7.47002000  | #O |
| 3.87742000 | 4.15715000  | 6.79245000  | #O |
| 5.35870000 | 2.20268000  | 5.47943000  | #O |
| 5.36054000 | 6.10169000  | 5.47278000  | #O |
| 3.88133000 | 4.15649000  | 4.21505000  | #O |
| 3.88027000 | 0.89834000  | 3.48487000  | #O |
| 5.35867000 | 5.37000000  | 2.05979000  | #O |
| 5.35751000 | 2.93053000  | 2.05849000  | #O |
| 3.87685000 | 0.90755000  | 0.90456000  | #O |
| 6.83617000 | 0.93404000  | 16.61919000 | #O |
| 8.35119000 | 5.35796000  | 15.55802000 | #O |
| 8.37100000 | 2.89399000  | 15.42482000 | #O |
| 6.84529000 | 0.84832000  | 14.04647000 | #O |
| 6.84798000 | 4.16302000  | 13.41010000 | #O |
| 8.32661000 | 2.19317000  | 12.09728000 | #O |
| 8.32852000 | 6.10113000  | 12.07439000 | #O |
| 6.83288000 | 4.14060000  | 10.81682000 | #O |
| 6.85253000 | 0.90546000  | 10.08448000 | #O |
| 8.31485000 | 5.40598000  | 8.79045000  | #O |
| 8.31231000 | 2.89988000  | 8.78174000  | #O |
| 6.84187000 | 0.90007000  | 7.47423000  | #O |
| 6.83675000 | 4.15612000  | 6.79429000  | #O |
| 8.31968000 | 2.20322000  | 5.48028000  | #O |
| 8.31602000 | 6.10120000  | 5.47474000  | #O |
| 6.83774000 | 4.14952000  | 4.21680000  | #O |
| 6.83923000 | 0.90184000  | 3.48678000  | #O |
| 8.31570000 | 5.36954000  | 2.05849000  | #O |
| 8.31719000 | 2.93039000  | 2.05862000  | #O |
| 6.83694000 | 0.90778000  | 0.90470000  | #O |
| 0.93011000 | 7.41593000  | 16.63702000 | #O |
| 2.40414000 | 11.84799000 | 15.51492000 | #O |
| 2.40552000 | 9.41638000  | 15.48438000 | #O |
| 0.93197000 | 7.37819000  | 14.05872000 | #O |
| 0.92439000 | 10.65225000 | 13.34440000 | #O |
| 2.40654000 | 8.70060000  | 12.07833000 | #O |
| 2.39987000 | 12.58769000 | 12.05704000 | #O |
| 0.92220000 | 10.63676000 | 10.76922000 | #O |
| 0.93109000 | 7.40959000  | 10.07712000 | #O |
| 2.40265000 | 11.90235000 | 8.77412000  | #O |
| 2.39900000 | 9.39664000  | 8.76197000  | #O |
| 0.92943000 | 7.39553000  | 7.46808000  | #O |
| 0.92033000 | 10.65426000 | 6.76344000  | #O |
| 2.40288000 | 8.70238000  | 5.47505000  | #O |
| 2.40165000 | 12.59564000 | 5.46355000  | #O |
| 0.92020000 | 10.64506000 | 4.18897000  | #O |
| 0.92202000 | 7.40509000  | 3.48794000  | #O |
| 2.39922000 | 11.86614000 | 2.03356000  | #O |
| 2.39979000 | 9.42641000  | 2.03116000  | #O |
| 0.91822000 | 7.39020000  | 0.90597000  | #O |
| 3.89833000 | 7.42758000  | 16.61061000 | #O |
| 5.36298000 | 11.84940000 | 15.52726000 | #O |
| 5.36804000 | 9.42267000  | 15.47849000 | #O |

|             |             |             |    |
|-------------|-------------|-------------|----|
| 3.89084000  | 7.38171000  | 14.04566000 | #O |
| 3.88541000  | 10.65846000 | 13.34207000 | #O |
| 5.36567000  | 8.70119000  | 12.07340000 | #O |
| 5.36361000  | 12.58672000 | 12.05000000 | #O |
| 3.87974000  | 10.64011000 | 10.76771000 | #O |
| 3.89258000  | 7.41073000  | 10.08120000 | #O |
| 5.35661000  | 11.90249000 | 8.77486000  | #O |
| 5.36182000  | 9.39705000  | 8.76578000  | #O |
| 3.88736000  | 7.39831000  | 7.47051000  | #O |
| 3.87874000  | 10.65543000 | 6.76325000  | #O |
| 5.35891000  | 8.70233000  | 5.47519000  | #O |
| 5.35921000  | 12.59537000 | 5.46405000  | #O |
| 3.87925000  | 10.64752000 | 4.18759000  | #O |
| 3.88157000  | 7.40390000  | 3.48641000  | #O |
| 5.35825000  | 11.86682000 | 2.03457000  | #O |
| 5.35725000  | 9.42677000  | 2.03055000  | #O |
| 3.87744000  | 7.39207000  | 0.90583000  | #O |
| 6.83940000  | 7.40950000  | 16.60918000 | #O |
| 8.32474000  | 11.85553000 | 15.52019000 | #O |
| 8.32242000  | 9.42220000  | 15.49113000 | #O |
| 6.85336000  | 7.38333000  | 14.04473000 | #O |
| 6.84261000  | 10.65520000 | 13.34282000 | #O |
| 8.32842000  | 8.70083000  | 12.07818000 | #O |
| 8.32805000  | 12.58727000 | 12.05954000 | #O |
| 6.84378000  | 10.63918000 | 10.76940000 | #O |
| 6.85370000  | 7.40611000  | 10.08337000 | #O |
| 8.32065000  | 11.90206000 | 8.77215000  | #O |
| 8.31557000  | 9.39690000  | 8.76278000  | #O |
| 6.84112000  | 7.39781000  | 7.47457000  | #O |
| 6.83650000  | 10.65393000 | 6.76405000  | #O |
| 8.31978000  | 8.70195000  | 5.47689000  | #O |
| 8.31746000  | 12.59569000 | 5.46640000  | #O |
| 6.83801000  | 10.64513000 | 4.18959000  | #O |
| 6.83911000  | 7.40487000  | 3.48813000  | #O |
| 8.31701000  | 11.86651000 | 2.03490000  | #O |
| 8.31697000  | 9.42605000  | 2.03370000  | #O |
| 6.83741000  | 7.38991000  | 0.90570000  | #O |
| 9.79181000  | 0.90323000  | 16.63644000 | #O |
| 11.28358000 | 5.36338000  | 15.53006000 | #O |
| 11.28461000 | 2.91791000  | 15.51193000 | #O |
| 9.81706000  | 0.86412000  | 14.05507000 | #O |
| 9.81784000  | 4.17112000  | 13.34644000 | #O |
| 11.28158000 | 2.19865000  | 12.08147000 | #O |
| 11.28348000 | 6.10065000  | 12.05975000 | #O |
| 9.77986000  | 4.14264000  | 10.79314000 | #O |
| 9.80719000  | 0.90725000  | 10.07946000 | #O |
| 11.27614000 | 5.40630000  | 8.79098000  | #O |
| 11.27795000 | 2.90145000  | 8.77955000  | #O |
| 9.80184000  | 0.90401000  | 7.47198000  | #O |
| 9.79749000  | 4.15811000  | 6.78773000  | #O |
| 11.27594000 | 2.20415000  | 5.47626000  | #O |
| 11.27755000 | 6.10123000  | 5.47204000  | #O |
| 9.79385000  | 4.15701000  | 4.21314000  | #O |
| 9.79754000  | 0.89785000  | 3.48792000  | #O |
| 11.27553000 | 5.36965000  | 2.05626000  | #O |

|             |             |             |     |
|-------------|-------------|-------------|-----|
| 11.27432000 | 2.93019000  | 2.05817000  | #O  |
| 9.79520000  | 0.90807000  | 0.90667000  | #O  |
| 9.80008000  | 7.40715000  | 16.64443000 | #O  |
| 11.28096000 | 11.85069000 | 15.52572000 | #O  |
| 11.28009000 | 9.41439000  | 15.48341000 | #O  |
| 9.80635000  | 7.37937000  | 14.06191000 | #O  |
| 9.80309000  | 10.65821000 | 13.34603000 | #O  |
| 11.28249000 | 8.69970000  | 12.08451000 | #O  |
| 11.28328000 | 12.58840000 | 12.05663000 | #O  |
| 9.80014000  | 10.63933000 | 10.76836000 | #O  |
| 9.80662000  | 7.41091000  | 10.08079000 | #O  |
| 11.27455000 | 11.90274000 | 8.77144000  | #O  |
| 11.27821000 | 9.39723000  | 8.76278000  | #O  |
| 9.80295000  | 7.39648000  | 7.47349000  | #O  |
| 9.79556000  | 10.65477000 | 6.76367000  | #O  |
| 11.27618000 | 8.70186000  | 5.47618000  | #O  |
| 11.27684000 | 12.59587000 | 5.46673000  | #O  |
| 9.79594000  | 10.64824000 | 4.18932000  | #O  |
| 9.79763000  | 7.40172000  | 3.49014000  | #O  |
| 11.27507000 | 11.86591000 | 2.03467000  | #O  |
| 11.27379000 | 9.42673000  | 2.03253000  | #O  |
| 9.79568000  | 7.39241000  | 0.90850000  | #O  |
| 0.92839000  | 4.15412000  | 15.17592000 | #Ti |
| 2.40207000  | 0.87398000  | 15.52074000 | #Ti |
| 0.91610000  | 0.87638000  | 12.18415000 | #Ti |
| 2.41047000  | 4.11640000  | 11.99074000 | #Ti |
| 0.87130000  | 4.15523000  | 8.77938000  | #Ti |
| 2.25315000  | 0.90749000  | 8.76966000  | #Ti |
| 0.91623000  | 0.87261000  | 5.35457000  | #Ti |
| 2.40364000  | 4.11494000  | 5.59383000  | #Ti |
| 0.92029000  | 4.14926000  | 2.40036000  | #Ti |
| 2.39485000  | 0.90519000  | 1.99116000  | #Ti |
| 3.86871000  | 4.11577000  | 15.21513000 | #Ti |
| 5.35353000  | 0.87727000  | 15.50568000 | #Ti |
| 3.87534000  | 0.86503000  | 12.15875000 | #Ti |
| 5.38687000  | 4.10625000  | 12.09394000 | #Ti |
| 3.83251000  | 4.15136000  | 8.84019000  | #Ti |
| 5.21536000  | 0.90518000  | 8.76116000  | #Ti |
| 3.87574000  | 0.87548000  | 5.34914000  | #Ti |
| 5.35345000  | 4.11987000  | 5.60873000  | #Ti |
| 3.87930000  | 4.15222000  | 2.40225000  | #Ti |
| 5.35439000  | 0.90567000  | 1.98876000  | #Ti |
| 6.83258000  | 4.18281000  | 15.39150000 | #Ti |
| 8.31960000  | 0.89046000  | 15.51964000 | #Ti |
| 6.83699000  | 0.85742000  | 12.16476000 | #Ti |
| 8.27293000  | 4.11294000  | 12.06133000 | #Ti |
| 6.78585000  | 4.15516000  | 8.83058000  | #Ti |
| 8.17607000  | 0.90568000  | 8.76948000  | #Ti |
| 6.83276000  | 0.87914000  | 5.35005000  | #Ti |
| 8.31015000  | 4.11829000  | 5.60474000  | #Ti |
| 6.83711000  | 4.14900000  | 2.40639000  | #Ti |
| 8.31444000  | 0.90537000  | 1.99163000  | #Ti |
| 0.92176000  | 10.62943000 | 15.15715000 | #Ti |
| 2.40486000  | 7.38041000  | 15.54116000 | #Ti |
| 0.91808000  | 7.37616000  | 12.18973000 | #Ti |



|             |             |             |     |
|-------------|-------------|-------------|-----|
| 2.39656000  | 10.61318000 | 11.96572000 | #Ti |
| 0.86285000  | 10.65318000 | 8.76603000  | #Ti |
| 2.25301000  | 7.39887000  | 8.77042000  | #Ti |
| 0.91616000  | 7.36643000  | 5.35772000  | #Ti |
| 2.39471000  | 10.61208000 | 5.56509000  | #Ti |
| 0.91944000  | 10.64536000 | 2.37340000  | #Ti |
| 2.39501000  | 7.39633000  | 1.99194000  | #Ti |
| 3.87880000  | 10.63812000 | 15.15292000 | #Ti |
| 5.35429000  | 7.42072000  | 15.48709000 | #Ti |
| 3.87674000  | 7.35999000  | 12.15175000 | #Ti |
| 5.35624000  | 10.60440000 | 11.96199000 | #Ti |
| 3.82045000  | 10.64665000 | 8.76540000  | #Ti |
| 5.21777000  | 7.40118000  | 8.75886000  | #Ti |
| 3.87477000  | 7.37091000  | 5.35003000  | #Ti |
| 5.35327000  | 10.61500000 | 5.56562000  | #Ti |
| 3.87847000  | 10.64763000 | 2.37277000  | #Ti |
| 5.35511000  | 7.39611000  | 1.98963000  | #Ti |
| 6.84786000  | 10.65131000 | 15.15355000 | #Ti |
| 8.32475000  | 7.40518000  | 15.53805000 | #Ti |
| 6.83871000  | 7.36349000  | 12.16257000 | #Ti |
| 8.31756000  | 10.60875000 | 11.96697000 | #Ti |
| 6.78094000  | 10.65401000 | 8.76687000  | #Ti |
| 8.17774000  | 7.40044000  | 8.76992000  | #Ti |
| 6.83327000  | 7.37165000  | 5.35204000  | #Ti |
| 8.31189000  | 10.61434000 | 5.56644000  | #Ti |
| 6.83726000  | 10.64568000 | 2.37410000  | #Ti |
| 8.31474000  | 7.39567000  | 1.99282000  | #Ti |
| 9.81027000  | 4.12813000  | 15.14963000 | #Ti |
| 11.27668000 | 0.89111000  | 15.55370000 | #Ti |
| 9.79513000  | 0.87679000  | 12.18095000 | #Ti |
| 11.26909000 | 4.12240000  | 11.95314000 | #Ti |
| 9.74130000  | 4.15156000  | 8.82124000  | #Ti |
| 11.13158000 | 0.90732000  | 8.77357000  | #Ti |
| 9.79071000  | 0.87367000  | 5.35470000  | #Ti |
| 11.26547000 | 4.11395000  | 5.58696000  | #Ti |
| 9.79509000  | 4.15216000  | 2.40019000  | #Ti |
| 11.27227000 | 0.90549000  | 1.99400000  | #Ti |
| 9.80710000  | 10.64150000 | 15.15877000 | #Ti |
| 11.27827000 | 7.37734000  | 15.55582000 | #Ti |
| 9.79755000  | 7.36818000  | 12.18615000 | #Ti |
| 11.27377000 | 10.62016000 | 11.96667000 | #Ti |
| 9.74011000  | 10.64634000 | 8.76592000  | #Ti |
| 11.13237000 | 7.39894000  | 8.77731000  | #Ti |
| 9.79167000  | 7.36924000  | 5.35672000  | #Ti |
| 11.27063000 | 10.61105000 | 5.56598000  | #Ti |
| 9.79567000  | 10.64727000 | 2.37406000  | #Ti |
| 11.27361000 | 7.39569000  | 1.99521000  | #Ti |

Rut-Ser-D

1.000000000

8.876100 0.000000 0.000000

0.000000 12.992946 0.000000

0.000000 0.000000 30.000000

H C N O Ti

7 3 1 123 60

Cartesian

|            |            |             |    |
|------------|------------|-------------|----|
| 3.98001000 | 3.71024000 | 20.18921000 | #H |
| 4.28269000 | 5.18249000 | 21.14991000 | #H |
| 2.81097000 | 5.11718000 | 18.73127000 | #H |
| 6.28361000 | 4.69406000 | 19.82865000 | #H |
| 6.52542000 | 6.93180000 | 17.62699000 | #H |
| 4.73809000 | 6.93488000 | 18.71210000 | #H |
| 5.94722000 | 7.00132000 | 19.84554000 | #H |
| 4.13253000 | 4.80333000 | 20.12858000 | #C |
| 5.37034000 | 4.40018000 | 17.92652000 | #C |
| 5.40293000 | 5.08159000 | 19.29692000 | #C |
| 5.63018000 | 6.51535000 | 19.00535000 | #N |
| 2.98031000 | 5.46824000 | 19.62734000 | #O |
| 6.49502000 | 4.18223000 | 17.37075000 | #O |
| 4.22954000 | 4.18497000 | 17.38993000 | #O |
| 0.92052000 | 0.77171000 | 16.62717000 | #O |
| 2.36673000 | 5.27324000 | 15.47471000 | #O |
| 2.37858000 | 2.80262000 | 15.47352000 | #O |
| 0.92183000 | 0.76684000 | 14.04545000 | #O |
| 0.92192000 | 4.02857000 | 13.32081000 | #O |
| 2.39797000 | 2.07175000 | 12.05412000 | #O |
| 2.38819000 | 5.99946000 | 12.07006000 | #O |
| 0.91563000 | 4.04117000 | 10.77342000 | #O |
| 0.92396000 | 0.77217000 | 10.06211000 | #O |
| 2.40038000 | 5.28952000 | 8.77079000  | #O |
| 2.39760000 | 2.77967000 | 8.77717000  | #O |
| 0.92602000 | 0.78184000 | 7.45848000  | #O |
| 0.91738000 | 4.04389000 | 6.77587000  | #O |
| 2.39730000 | 2.08368000 | 5.46604000  | #O |
| 2.39870000 | 5.98641000 | 5.44736000  | #O |
| 0.91638000 | 4.03379000 | 4.19976000  | #O |
| 0.91759000 | 0.77197000 | 3.48323000  | #O |
| 2.39553000 | 5.25113000 | 2.03062000  | #O |
| 2.39571000 | 2.81000000 | 2.05047000  | #O |
| 0.91543000 | 0.78714000 | 0.90310000  | #O |
| 3.88933000 | 0.80960000 | 16.61381000 | #O |
| 5.35637000 | 5.29768000 | 15.22915000 | #O |
| 5.35692000 | 2.77075000 | 15.30908000 | #O |
| 3.86178000 | 0.73241000 | 14.03663000 | #O |
| 3.83462000 | 4.02543000 | 13.36260000 | #O |
| 5.35846000 | 2.07016000 | 12.09457000 | #O |
| 5.35446000 | 6.00149000 | 12.11278000 | #O |
| 3.90553000 | 4.04287000 | 10.79559000 | #O |
| 3.88562000 | 0.77299000 | 10.06481000 | #O |
| 5.34968000 | 5.29047000 | 8.76683000  | #O |
| 5.35185000 | 2.77877000 | 8.76812000  | #O |
| 3.88426000 | 0.77790000 | 7.45817000  | #O |
| 3.87366000 | 4.03833000 | 6.77655000  | #O |
| 5.35740000 | 2.08219000 | 5.46796000  | #O |
| 5.35349000 | 5.98688000 | 5.45322000  | #O |
| 3.87650000 | 4.03266000 | 4.19965000  | #O |
| 3.87951000 | 0.77567000 | 3.48135000  | #O |
| 5.35405000 | 5.25112000 | 2.03166000  | #O |
| 5.35488000 | 2.81013000 | 2.04911000  | #O |

|            |             |             |    |
|------------|-------------|-------------|----|
| 3.87386000 | 0.78413000  | 0.90063000  | #O |
| 6.83025000 | 0.80912000  | 16.61463000 | #O |
| 8.34299000 | 5.27999000  | 15.44691000 | #O |
| 8.33645000 | 2.80653000  | 15.47370000 | #O |
| 6.85428000 | 0.73194000  | 14.03886000 | #O |
| 6.87497000 | 4.02575000  | 13.36079000 | #O |
| 8.31990000 | 2.07136000  | 12.05735000 | #O |
| 8.31787000 | 6.00086000  | 12.08104000 | #O |
| 6.80613000 | 4.04173000  | 10.79555000 | #O |
| 6.84210000 | 0.77560000  | 10.06364000 | #O |
| 8.30634000 | 5.28512000  | 8.77218000  | #O |
| 8.30876000 | 2.77964000  | 8.77364000  | #O |
| 6.84396000 | 0.77796000  | 7.45772000  | #O |
| 6.83379000 | 4.04092000  | 6.77833000  | #O |
| 8.31523000 | 2.08562000  | 5.46793000  | #O |
| 8.31148000 | 5.98747000  | 5.44907000  | #O |
| 6.83354000 | 4.03443000  | 4.20090000  | #O |
| 6.84047000 | 0.77414000  | 3.48229000  | #O |
| 8.31262000 | 5.25195000  | 2.03499000  | #O |
| 8.31280000 | 2.81080000  | 2.05045000  | #O |
| 6.83264000 | 0.78609000  | 0.90173000  | #O |
| 0.91015000 | 7.27283000  | 16.68363000 | #O |
| 2.40061000 | 11.74098000 | 15.51029000 | #O |
| 2.39303000 | 9.30918000  | 15.55545000 | #O |
| 0.89277000 | 7.31273000  | 14.09982000 | #O |
| 0.92115000 | 10.51636000 | 13.35513000 | #O |
| 2.38872000 | 8.57627000  | 12.05332000 | #O |
| 2.39572000 | 12.46231000 | 12.05245000 | #O |
| 0.91800000 | 10.51981000 | 10.76536000 | #O |
| 0.91858000 | 7.27863000  | 10.03383000 | #O |
| 2.39580000 | 11.77088000 | 8.76091000  | #O |
| 2.39916000 | 9.26278000  | 8.76109000  | #O |
| 0.91862000 | 7.27672000  | 7.44697000  | #O |
| 0.91662000 | 10.51596000 | 6.75750000  | #O |
| 2.39787000 | 8.57801000  | 5.44013000  | #O |
| 2.39794000 | 12.47153000 | 5.46450000  | #O |
| 0.91590000 | 10.52589000 | 4.18004000  | #O |
| 0.91814000 | 7.28059000  | 3.44703000  | #O |
| 2.39466000 | 11.74109000 | 2.02535000  | #O |
| 2.39527000 | 9.30078000  | 2.01594000  | #O |
| 0.91294000 | 7.27437000  | 0.86055000  | #O |
| 3.93050000 | 7.23645000  | 16.61997000 | #O |
| 5.35637000 | 11.73191000 | 15.51558000 | #O |
| 5.36012000 | 9.29961000  | 15.50172000 | #O |
| 3.82584000 | 7.34782000  | 14.08464000 | #O |
| 3.87446000 | 10.51682000 | 13.34771000 | #O |
| 5.35437000 | 8.58134000  | 12.05484000 | #O |
| 5.35858000 | 12.46422000 | 12.05186000 | #O |
| 3.87415000 | 10.51912000 | 10.76844000 | #O |
| 3.88592000 | 7.27543000  | 10.06252000 | #O |
| 5.35561000 | 11.77067000 | 8.76303000  | #O |
| 5.35000000 | 9.26417000  | 8.76263000  | #O |
| 3.87248000 | 7.28018000  | 7.45367000  | #O |
| 3.87320000 | 10.51852000 | 6.75819000  | #O |
| 5.35359000 | 8.57781000  | 5.44590000  | #O |

|            |             |             |     |
|------------|-------------|-------------|-----|
| 5.35738000 | 12.47144000 | 5.46346000  | #O  |
| 3.87568000 | 10.52619000 | 4.18022000  | #O  |
| 3.87527000 | 7.28027000  | 3.44084000  | #O  |
| 5.35335000 | 11.74089000 | 2.02513000  | #O  |
| 5.35284000 | 9.30039000  | 2.01720000  | #O  |
| 3.87272000 | 7.27310000  | 0.85932000  | #O  |
| 6.80099000 | 7.22505000  | 16.68106000 | #O  |
| 8.31486000 | 11.73751000 | 15.51227000 | #O  |
| 8.31602000 | 9.30211000  | 15.54015000 | #O  |
| 6.85034000 | 7.35644000  | 14.06898000 | #O  |
| 6.83754000 | 10.51789000 | 13.34586000 | #O  |
| 8.32429000 | 8.58112000  | 12.06164000 | #O  |
| 8.32350000 | 12.46355000 | 12.05454000 | #O  |
| 6.83735000 | 10.51736000 | 10.76671000 | #O  |
| 6.83186000 | 7.27977000  | 10.06663000 | #O  |
| 8.31340000 | 11.77146000 | 8.76196000  | #O  |
| 8.31133000 | 9.26721000  | 8.75717000  | #O  |
| 6.82964000 | 7.27829000  | 7.47103000  | #O  |
| 6.83255000 | 10.51604000 | 6.75735000  | #O  |
| 8.31166000 | 8.57590000  | 5.44310000  | #O  |
| 8.31640000 | 12.47018000 | 5.46794000  | #O  |
| 6.83395000 | 10.52613000 | 4.18046000  | #O  |
| 6.82960000 | 7.28030000  | 3.44843000  | #O  |
| 8.31199000 | 11.73984000 | 2.02339000  | #O  |
| 8.31155000 | 9.29904000  | 2.02238000  | #O  |
| 6.83507000 | 7.27185000  | 0.86126000  | #O  |
| 0.92300000 | 4.04168000  | 15.11596000 | #Ti |
| 2.39851000 | 0.77775000  | 15.53454000 | #Ti |
| 0.90984000 | 0.80275000  | 12.17387000 | #Ti |
| 2.43296000 | 4.03678000  | 11.98225000 | #Ti |
| 0.88845000 | 4.02349000  | 8.82328000  | #Ti |
| 2.25541000 | 0.78393000  | 8.76294000  | #Ti |
| 0.91618000 | 0.79822000  | 5.35177000  | #Ti |
| 2.39647000 | 4.04889000  | 5.59336000  | #Ti |
| 0.91592000 | 4.02924000  | 2.39287000  | #Ti |
| 2.39201000 | 0.78327000  | 1.98960000  | #Ti |
| 3.88551000 | 4.00190000  | 15.33971000 | #Ti |
| 5.36122000 | 0.76547000  | 15.51351000 | #Ti |
| 3.87958000 | 0.79850000  | 12.17487000 | #Ti |
| 5.35569000 | 4.05968000  | 12.18601000 | #Ti |
| 3.85371000 | 4.03356000  | 8.84663000  | #Ti |
| 5.21285000 | 0.78094000  | 8.76186000  | #Ti |
| 3.87159000 | 0.79641000  | 5.35197000  | #Ti |
| 5.35224000 | 4.04990000  | 5.60200000  | #Ti |
| 3.87489000 | 4.02912000  | 2.39205000  | #Ti |
| 5.34990000 | 0.78335000  | 1.98937000  | #Ti |
| 6.84518000 | 4.03185000  | 15.35385000 | #Ti |
| 8.31905000 | 0.78189000  | 15.53327000 | #Ti |
| 6.83398000 | 0.79873000  | 12.17369000 | #Ti |
| 8.27233000 | 4.05725000  | 11.98896000 | #Ti |
| 6.79988000 | 4.02676000  | 8.84804000  | #Ti |
| 8.17252000 | 0.78407000  | 8.76273000  | #Ti |
| 6.82435000 | 0.79651000  | 5.35258000  | #Ti |
| 8.30812000 | 4.03789000  | 5.59660000  | #Ti |
| 6.83331000 | 4.02952000  | 2.39325000  | #Ti |

|            |             |             |     |
|------------|-------------|-------------|-----|
| 8.30823000 | 0.78308000  | 1.99075000  | #Ti |
| 0.91997000 | 10.53316000 | 15.17174000 | #Ti |
| 2.44583000 | 7.27547000  | 15.56837000 | #Ti |
| 0.93393000 | 7.29345000  | 12.24243000 | #Ti |
| 2.39206000 | 10.56058000 | 11.97202000 | #Ti |
| 0.87318000 | 10.52359000 | 8.76606000  | #Ti |
| 2.29467000 | 7.26774000  | 8.65072000  | #Ti |
| 0.90731000 | 7.28988000  | 5.30674000  | #Ti |
| 2.39227000 | 10.54132000 | 5.55958000  | #Ti |
| 0.91496000 | 10.52294000 | 2.36612000  | #Ti |
| 2.39141000 | 7.27174000  | 1.94445000  | #Ti |
| 3.87832000 | 10.51580000 | 15.16165000 | #Ti |
| 5.25377000 | 7.26792000  | 15.26618000 | #Ti |
| 3.86695000 | 7.29677000  | 11.88418000 | #Ti |
| 5.35286000 | 10.54761000 | 11.96554000 | #Ti |
| 3.83019000 | 10.51835000 | 8.76938000  | #Ti |
| 5.35714000 | 7.27427000  | 8.60705000  | #Ti |
| 3.87119000 | 7.29011000  | 5.28668000  | #Ti |
| 5.34930000 | 10.53794000 | 5.56031000  | #Ti |
| 3.87386000 | 10.52395000 | 2.36575000  | #Ti |
| 5.35380000 | 7.27171000  | 1.94122000  | #Ti |
| 6.83630000 | 10.50838000 | 15.15964000 | #Ti |
| 8.37305000 | 7.28107000  | 15.58284000 | #Ti |
| 6.83759000 | 7.30738000  | 12.18238000 | #Ti |
| 8.31425000 | 10.54640000 | 11.96642000 | #Ti |
| 6.79181000 | 10.52501000 | 8.76536000  | #Ti |
| 8.27123000 | 7.26870000  | 8.88837000  | #Ti |
| 6.83906000 | 7.28839000  | 5.30114000  | #Ti |
| 8.30914000 | 10.55160000 | 5.55994000  | #Ti |
| 6.83243000 | 10.52283000 | 2.36648000  | #Ti |
| 8.31309000 | 7.27140000  | 1.95131000  | #Ti |

Rut-Ser-Z

1.000000000

8.876100 0.000000 0.000000

0.000000 12.992946 0.000000

0.000000 0.000000 30.000000

H C N O Ti

7 3 1 123 60

Cartesian

4.02705000 3.80214000 20.24589000 #H

4.29423000 5.33074000 21.11945000 #H

2.78839000 5.09216000 18.72863000 #H

6.30049000 4.89289000 19.78297000 #H

6.20443000 6.80740000 18.06686000 #H

4.56784000 6.87426000 18.34348000 #H

5.59163000 7.20373000 19.65385000 #H

4.13952000 4.89451000 20.12042000 #C

5.36172000 4.38346000 17.91451000 #C

5.37752000 5.14974000 19.24492000 #C

5.45267000 6.59586000 18.84188000 #N

2.96601000 5.50023000 19.60004000 #O

6.49460000 4.15530000 17.39393000 #O

4.21745000 4.15046000 17.40514000 #O

|            |            |             |    |
|------------|------------|-------------|----|
| 0.91780000 | 0.76893000 | 16.63360000 | #O |
| 2.36737000 | 5.25979000 | 15.48557000 | #O |
| 2.37314000 | 2.79409000 | 15.47144000 | #O |
| 0.91992000 | 0.76106000 | 14.05200000 | #O |
| 0.92258000 | 4.02655000 | 13.32425000 | #O |
| 2.39814000 | 2.07007000 | 12.05836000 | #O |
| 2.39738000 | 5.99379000 | 12.07657000 | #O |
| 0.91511000 | 4.03819000 | 10.77570000 | #O |
| 0.92361000 | 0.77069000 | 10.06613000 | #O |
| 2.40258000 | 5.28500000 | 8.77439000  | #O |
| 2.39912000 | 2.77614000 | 8.78222000  | #O |
| 0.92789000 | 0.77869000 | 7.46189000  | #O |
| 0.92072000 | 4.03636000 | 6.77920000  | #O |
| 2.40002000 | 2.07968000 | 5.46833000  | #O |
| 2.40256000 | 5.98146000 | 5.45382000  | #O |
| 0.91795000 | 4.03092000 | 4.20401000  | #O |
| 0.92012000 | 0.76936000 | 3.48746000  | #O |
| 2.39904000 | 5.24507000 | 2.03460000  | #O |
| 2.39921000 | 2.80437000 | 2.05497000  | #O |
| 0.91963000 | 0.77930000 | 0.90654000  | #O |
| 3.88447000 | 0.80826000 | 16.62097000 | #O |
| 5.35185000 | 5.28575000 | 15.25835000 | #O |
| 5.35261000 | 2.76128000 | 15.30731000 | #O |
| 3.86073000 | 0.72847000 | 14.04088000 | #O |
| 3.83715000 | 4.01971000 | 13.36338000 | #O |
| 5.35870000 | 2.06841000 | 12.09623000 | #O |
| 5.36117000 | 5.99521000 | 12.11979000 | #O |
| 3.90582000 | 4.03982000 | 10.79753000 | #O |
| 3.88670000 | 0.77011000 | 10.06798000 | #O |
| 5.35185000 | 5.28694000 | 8.77166000  | #O |
| 5.35394000 | 2.77552000 | 8.77344000  | #O |
| 3.88499000 | 0.77574000 | 7.46127000  | #O |
| 3.87570000 | 4.03182000 | 6.78076000  | #O |
| 5.35912000 | 2.07858000 | 5.46996000  | #O |
| 5.35646000 | 5.98190000 | 5.46161000  | #O |
| 3.87874000 | 4.02839000 | 4.20362000  | #O |
| 3.88277000 | 0.77005000 | 3.48500000  | #O |
| 5.35802000 | 5.24631000 | 2.03913000  | #O |
| 5.35776000 | 2.80564000 | 2.04980000  | #O |
| 3.87741000 | 0.77942000 | 0.90440000  | #O |
| 6.82544000 | 0.80379000 | 16.62174000 | #O |
| 8.33335000 | 5.26749000 | 15.45353000 | #O |
| 8.33353000 | 2.79835000 | 15.47539000 | #O |
| 6.85329000 | 0.72747000 | 14.04466000 | #O |
| 6.87123000 | 4.01901000 | 13.36371000 | #O |
| 8.32066000 | 2.07034000 | 12.06514000 | #O |
| 8.32167000 | 5.99565000 | 12.09394000 | #O |
| 6.80920000 | 4.04020000 | 10.79720000 | #O |
| 6.84331000 | 0.77379000 | 10.06824000 | #O |
| 8.30970000 | 5.28158000 | 8.77429000  | #O |
| 8.31008000 | 2.77603000 | 8.77735000  | #O |
| 6.84510000 | 0.77465000 | 7.46118000  | #O |
| 6.83593000 | 4.03488000 | 6.78239000  | #O |
| 8.31778000 | 2.08215000 | 5.47063000  | #O |
| 8.31465000 | 5.98345000 | 5.45846000  | #O |

|            |             |             |    |
|------------|-------------|-------------|----|
| 6.83656000 | 4.02905000  | 4.20539000  | #O |
| 6.84258000 | 0.77190000  | 3.48539000  | #O |
| 8.31578000 | 5.24623000  | 2.04243000  | #O |
| 8.31635000 | 2.80576000  | 2.04987000  | #O |
| 6.83667000 | 0.78022000  | 0.90583000  | #O |
| 0.90306000 | 7.25789000  | 16.69935000 | #O |
| 2.39839000 | 11.73483000 | 15.51975000 | #O |
| 2.38834000 | 9.30538000  | 15.57503000 | #O |
| 0.93328000 | 7.31060000  | 14.10834000 | #O |
| 0.92127000 | 10.51129000 | 13.36500000 | #O |
| 2.39563000 | 8.57588000  | 12.05920000 | #O |
| 2.39584000 | 12.46048000 | 12.05655000 | #O |
| 0.91612000 | 10.51535000 | 10.77431000 | #O |
| 0.92255000 | 7.27507000  | 10.03146000 | #O |
| 2.39537000 | 11.76887000 | 8.76809000  | #O |
| 2.40242000 | 9.26164000  | 8.76672000  | #O |
| 0.92722000 | 7.27580000  | 7.44673000  | #O |
| 0.91857000 | 10.51296000 | 6.76468000  | #O |
| 2.40091000 | 8.57530000  | 5.44609000  | #O |
| 2.40000000 | 12.46760000 | 5.46946000  | #O |
| 0.91810000 | 10.52195000 | 4.18700000  | #O |
| 0.92176000 | 7.27514000  | 3.45675000  | #O |
| 2.39784000 | 11.73710000 | 2.03088000  | #O |
| 2.39923000 | 9.29740000  | 2.02078000  | #O |
| 0.91566000 | 7.26906000  | 0.87116000  | #O |
| 3.90832000 | 7.22220000  | 16.66474000 | #O |
| 5.34932000 | 11.72991000 | 15.52248000 | #O |
| 5.35752000 | 9.30012000  | 15.53907000 | #O |
| 3.85412000 | 7.34852000  | 14.09944000 | #O |
| 3.87523000 | 10.51349000 | 13.35709000 | #O |
| 5.36230000 | 8.57879000  | 12.06558000 | #O |
| 5.35912000 | 12.46199000 | 12.05559000 | #O |
| 3.87441000 | 10.51759000 | 10.77646000 | #O |
| 3.89357000 | 7.27272000  | 10.07615000 | #O |
| 5.35693000 | 11.76972000 | 8.76694000  | #O |
| 5.35105000 | 9.26301000  | 8.77189000  | #O |
| 3.87824000 | 7.27761000  | 7.45916000  | #O |
| 3.87565000 | 10.51705000 | 6.76436000  | #O |
| 5.35732000 | 8.57558000  | 5.45161000  | #O |
| 5.35985000 | 12.46848000 | 5.46724000  | #O |
| 3.87767000 | 10.52244000 | 4.18667000  | #O |
| 3.88016000 | 7.27535000  | 3.45101000  | #O |
| 5.35730000 | 11.73601000 | 2.02958000  | #O |
| 5.35717000 | 9.29617000  | 2.02621000  | #O |
| 3.87578000 | 7.26908000  | 0.86973000  | #O |
| 6.79849000 | 7.21002000  | 16.70178000 | #O |
| 8.31196000 | 11.73587000 | 15.51999000 | #O |
| 8.30829000 | 9.30325000  | 15.56243000 | #O |
| 6.85871000 | 7.34668000  | 14.08579000 | #O |
| 6.83496000 | 10.51529000 | 13.35735000 | #O |
| 8.32712000 | 8.57755000  | 12.07945000 | #O |
| 8.32306000 | 12.46131000 | 12.06006000 | #O |
| 6.83817000 | 10.51306000 | 10.77504000 | #O |
| 6.83926000 | 7.27612000  | 10.08055000 | #O |
| 8.31468000 | 11.76918000 | 8.76622000  | #O |

|            |             |             |     |
|------------|-------------|-------------|-----|
| 8.31230000 | 9.26510000  | 8.76429000  | #O  |
| 6.82915000 | 7.27638000  | 7.48146000  | #O  |
| 6.83392000 | 10.51296000 | 6.76565000  | #O  |
| 8.31408000 | 8.57300000  | 5.45194000  | #O  |
| 8.31849000 | 12.46782000 | 5.47333000  | #O  |
| 6.83791000 | 10.52466000 | 4.18817000  | #O  |
| 6.83423000 | 7.27418000  | 3.46156000  | #O  |
| 8.31590000 | 11.73429000 | 2.02858000  | #O  |
| 8.31527000 | 9.29411000  | 2.02967000  | #O  |
| 6.83836000 | 7.26535000  | 0.87469000  | #O  |
| 0.91576000 | 4.04037000  | 15.12236000 | #Ti |
| 2.39262000 | 0.77035000  | 15.53879000 | #Ti |
| 0.91171000 | 0.80373000  | 12.18031000 | #Ti |
| 2.42683000 | 4.04835000  | 11.98286000 | #Ti |
| 0.88563000 | 4.02050000  | 8.82070000  | #Ti |
| 2.25583000 | 0.78074000  | 8.76801000  | #Ti |
| 0.91831000 | 0.79882000  | 5.35688000  | #Ti |
| 2.39876000 | 4.05029000  | 5.59444000  | #Ti |
| 0.91887000 | 4.02424000  | 2.39655000  | #Ti |
| 2.39600000 | 0.77797000  | 1.99442000  | #Ti |
| 3.87859000 | 3.99127000  | 15.31333000 | #Ti |
| 5.35439000 | 0.76000000  | 15.51933000 | #Ti |
| 3.87571000 | 0.80091000  | 12.17940000 | #Ti |
| 5.35391000 | 4.06414000  | 12.16563000 | #Ti |
| 3.85031000 | 4.03078000  | 8.84339000  | #Ti |
| 5.21396000 | 0.77838000  | 8.76511000  | #Ti |
| 3.87405000 | 0.79637000  | 5.35639000  | #Ti |
| 5.35444000 | 4.05205000  | 5.60471000  | #Ti |
| 3.87802000 | 4.02427000  | 2.39561000  | #Ti |
| 5.35388000 | 0.77791000  | 1.99368000  | #Ti |
| 6.83782000 | 4.02275000  | 15.32675000 | #Ti |
| 8.31396000 | 0.78028000  | 15.53976000 | #Ti |
| 6.83524000 | 0.80443000  | 12.18060000 | #Ti |
| 8.27712000 | 4.06558000  | 11.99222000 | #Ti |
| 6.79797000 | 4.02472000  | 8.84648000  | #Ti |
| 8.17310000 | 0.78065000  | 8.76832000  | #Ti |
| 6.82641000 | 0.79738000  | 5.35719000  | #Ti |
| 8.31027000 | 4.03967000  | 5.59936000  | #Ti |
| 6.83639000 | 4.02393000  | 2.39733000  | #Ti |
| 8.31249000 | 0.77758000  | 1.99510000  | #Ti |
| 0.91424000 | 10.51973000 | 15.18250000 | #Ti |
| 2.38172000 | 7.26531000  | 15.59987000 | #Ti |
| 0.93375000 | 7.29576000  | 12.28931000 | #Ti |
| 2.39066000 | 10.55609000 | 11.98040000 | #Ti |
| 0.87254000 | 10.52093000 | 8.77548000  | #Ti |
| 2.28560000 | 7.26680000  | 8.67183000  | #Ti |
| 0.90985000 | 7.29133000  | 5.32244000  | #Ti |
| 2.39380000 | 10.54322000 | 5.56697000  | #Ti |
| 0.91843000 | 10.51846000 | 2.37340000  | #Ti |
| 2.39290000 | 7.26803000  | 1.95586000  | #Ti |
| 3.87179000 | 10.50457000 | 15.17120000 | #Ti |
| 5.24146000 | 7.26950000  | 15.31536000 | #Ti |
| 3.86886000 | 7.30151000  | 11.91109000 | #Ti |
| 5.35178000 | 10.55529000 | 11.97590000 | #Ti |
| 3.83016000 | 10.51690000 | 8.77822000  | #Ti |



|            |             |             |     |
|------------|-------------|-------------|-----|
| 5.34428000 | 7.27207000  | 8.61989000  | #Ti |
| 3.87337000 | 7.29161000  | 5.29906000  | #Ti |
| 5.35138000 | 10.53933000 | 5.56806000  | #Ti |
| 3.87731000 | 10.52004000 | 2.37272000  | #Ti |
| 5.35558000 | 7.26733000  | 1.95356000  | #Ti |
| 6.83314000 | 10.51328000 | 15.17204000 | #Ti |
| 8.25509000 | 7.27376000  | 15.64695000 | #Ti |
| 6.83817000 | 7.31318000  | 12.19840000 | #Ti |
| 8.31252000 | 10.54896000 | 11.97808000 | #Ti |
| 6.79109000 | 10.52120000 | 8.77568000  | #Ti |
| 8.26316000 | 7.26718000  | 8.89594000  | #Ti |
| 6.84155000 | 7.28937000  | 5.31576000  | #Ti |
| 8.31073000 | 10.55341000 | 5.56905000  | #Ti |
| 6.83608000 | 10.51778000 | 2.37449000  | #Ti |
| 8.31631000 | 7.26686000  | 1.96558000  | #Ti |

Rut-Ser-C

1.000000000

|          |           |           |
|----------|-----------|-----------|
| 8.876100 | 0.000000  | 0.000000  |
| 0.000000 | 12.992946 | 0.000000  |
| 0.000000 | 0.000000  | 30.000000 |

H C N O Ti

7 3 1 123 60

Cartesian

|            |            |             |    |
|------------|------------|-------------|----|
| 1.04785000 | 4.17887000 | 17.52317000 | #H |
| 1.12174000 | 3.67105000 | 19.20699000 | #H |
| 0.61690000 | 6.31196000 | 18.28007000 | #H |
| 3.27172000 | 2.86003000 | 17.75526000 | #H |
| 4.56829000 | 3.82803000 | 17.81938000 | #H |
| 3.05572000 | 5.80008000 | 18.13900000 | #H |
| 4.06164000 | 3.47282000 | 21.21892000 | #H |
| 1.34714000 | 4.51611000 | 18.53921000 | #C |
| 2.88010000 | 4.78196000 | 18.51065000 | #C |
| 3.42023000 | 4.72511000 | 19.93717000 | #C |
| 3.56962000 | 3.83346000 | 17.59511000 | #N |
| 0.59529000 | 5.61257000 | 18.97519000 | #O |
| 3.51685000 | 5.67617000 | 20.68361000 | #O |
| 3.75277000 | 3.44267000 | 20.28935000 | #O |
| 6.49072000 | 0.86496000 | 16.62143000 | #O |
| 7.97934000 | 5.33202000 | 15.48724000 | #O |
| 7.97686000 | 2.88785000 | 15.48262000 | #O |
| 6.50986000 | 0.83675000 | 14.04274000 | #O |
| 6.51743000 | 4.11194000 | 13.31937000 | #O |
| 7.98127000 | 2.14923000 | 12.04960000 | #O |
| 7.98278000 | 6.05309000 | 12.05513000 | #O |
| 6.47356000 | 4.10280000 | 10.76551000 | #O |
| 6.50467000 | 0.84462000 | 10.06625000 | #O |
| 7.97690000 | 5.34799000 | 8.76758000  | #O |
| 7.97685000 | 2.84225000 | 8.77408000  | #O |
| 6.50669000 | 0.84531000 | 7.45729000  | #O |
| 6.50054000 | 4.07975000 | 6.76646000  | #O |
| 7.98208000 | 2.13256000 | 5.45739000  | #O |
| 7.98055000 | 6.03059000 | 5.46311000  | #O |
| 6.50030000 | 4.08452000 | 4.19319000  | #O |

|            |             |             |    |
|------------|-------------|-------------|----|
| 6.50212000 | 0.82713000  | 3.47481000  | #O |
| 7.98171000 | 5.30280000  | 2.03410000  | #O |
| 7.98162000 | 2.86256000  | 2.04232000  | #O |
| 6.50231000 | 0.83834000  | 0.89298000  | #O |
| 0.58378000 | 0.87629000  | 16.61842000 | #O |
| 2.05231000 | 5.33571000  | 15.45752000 | #O |
| 2.02605000 | 2.86464000  | 15.40071000 | #O |
| 0.57635000 | 0.82881000  | 14.03953000 | #O |
| 0.55805000 | 4.11055000  | 13.32030000 | #O |
| 2.06217000 | 2.14428000  | 12.07638000 | #O |
| 2.06248000 | 6.05434000  | 12.08066000 | #O |
| 0.60585000 | 4.10164000  | 10.76652000 | #O |
| 0.59306000 | 0.84499000  | 10.06763000 | #O |
| 2.06130000 | 5.34891000  | 8.75857000  | #O |
| 2.06079000 | 2.84062000  | 8.76895000  | #O |
| 0.58649000 | 0.84562000  | 7.45697000  | #O |
| 0.57974000 | 4.08244000  | 6.76660000  | #O |
| 2.06305000 | 2.13265000  | 5.45993000  | #O |
| 2.06387000 | 6.03094000  | 5.46456000  | #O |
| 0.58464000 | 4.08685000  | 4.19341000  | #O |
| 0.58548000 | 0.82813000  | 3.47364000  | #O |
| 2.06430000 | 5.30373000  | 2.03794000  | #O |
| 2.06443000 | 2.86337000  | 2.04088000  | #O |
| 0.58500000 | 0.84010000  | 0.89144000  | #O |
| 3.53021000 | 0.92225000  | 16.61731000 | #O |
| 5.03636000 | 5.32868000  | 15.49791000 | #O |
| 5.06122000 | 2.86801000  | 15.43056000 | #O |
| 3.54722000 | 0.81590000  | 14.03867000 | #O |
| 3.54492000 | 4.10014000  | 13.36737000 | #O |
| 5.02462000 | 2.14379000  | 12.07212000 | #O |
| 5.02388000 | 6.05506000  | 12.07793000 | #O |
| 3.53753000 | 4.10335000  | 10.78451000 | #O |
| 3.55021000 | 0.84430000  | 10.06946000 | #O |
| 5.01420000 | 5.34882000  | 8.75596000  | #O |
| 5.01494000 | 2.84123000  | 8.76719000  | #O |
| 3.54504000 | 0.84348000  | 7.45815000  | #O |
| 3.53965000 | 4.07947000  | 6.76868000  | #O |
| 5.02265000 | 2.13207000  | 5.45877000  | #O |
| 5.02119000 | 6.03068000  | 5.46443000  | #O |
| 3.54231000 | 4.08408000  | 4.19504000  | #O |
| 3.54377000 | 0.82875000  | 3.47468000  | #O |
| 5.02302000 | 5.30365000  | 2.03851000  | #O |
| 5.02318000 | 2.86346000  | 2.04108000  | #O |
| 3.54404000 | 0.83708000  | 0.89244000  | #O |
| 6.49702000 | 7.35469000  | 16.62656000 | #O |
| 7.97626000 | 11.82028000 | 15.50958000 | #O |
| 7.98217000 | 9.38144000  | 15.50843000 | #O |
| 6.50733000 | 7.35717000  | 14.05271000 | #O |
| 6.49957000 | 10.59699000 | 13.34825000 | #O |
| 7.98129000 | 8.65203000  | 12.06224000 | #O |
| 7.97955000 | 12.53926000 | 12.05643000 | #O |
| 6.49746000 | 10.59430000 | 10.76693000 | #O |
| 6.50718000 | 7.34560000  | 10.07306000 | #O |
| 7.97752000 | 11.84369000 | 8.76176000  | #O |
| 7.97581000 | 9.33805000  | 8.76547000  | #O |

|            |             |             |     |
|------------|-------------|-------------|-----|
| 6.50479000 | 7.34266000  | 7.46170000  | #O  |
| 6.49868000 | 10.57625000 | 6.75830000  | #O  |
| 7.98114000 | 8.63122000  | 5.45707000  | #O  |
| 7.98136000 | 12.52423000 | 5.46249000  | #O  |
| 6.50067000 | 10.58266000 | 4.18318000  | #O  |
| 6.50215000 | 7.33123000  | 3.47372000  | #O  |
| 7.98179000 | 11.79855000 | 2.02230000  | #O  |
| 7.98062000 | 9.35905000  | 2.02664000  | #O  |
| 6.50252000 | 7.32757000  | 0.89079000  | #O  |
| 0.59167000 | 7.32241000  | 16.64117000 | #O  |
| 2.06159000 | 11.81958000 | 15.51427000 | #O  |
| 2.05809000 | 9.38586000  | 15.50929000 | #O  |
| 0.58336000 | 7.37065000  | 14.05059000 | #O  |
| 0.58135000 | 10.60147000 | 13.34643000 | #O  |
| 2.06332000 | 8.65252000  | 12.05735000 | #O  |
| 2.06089000 | 12.53822000 | 12.05704000 | #O  |
| 0.57834000 | 10.59420000 | 10.76718000 | #O  |
| 0.59415000 | 7.34652000  | 10.07185000 | #O  |
| 2.05859000 | 11.84316000 | 8.75813000  | #O  |
| 2.06011000 | 9.33841000  | 8.76854000  | #O  |
| 0.58603000 | 7.34366000  | 7.46055000  | #O  |
| 0.58053000 | 10.57718000 | 6.75857000  | #O  |
| 2.06277000 | 8.63137000  | 5.45777000  | #O  |
| 2.06318000 | 12.52408000 | 5.46199000  | #O  |
| 0.58296000 | 10.58187000 | 4.18330000  | #O  |
| 0.58491000 | 7.33059000  | 3.47360000  | #O  |
| 2.06284000 | 11.79938000 | 2.02692000  | #O  |
| 2.06363000 | 9.36022000  | 2.02901000  | #O  |
| 0.58632000 | 7.33002000  | 0.88971000  | #O  |
| 3.53323000 | 7.34046000  | 16.61416000 | #O  |
| 5.01691000 | 11.82161000 | 15.50748000 | #O  |
| 5.01799000 | 9.38472000  | 15.50497000 | #O  |
| 3.54569000 | 7.37181000  | 14.04522000 | #O  |
| 3.53924000 | 10.59856000 | 13.34543000 | #O  |
| 5.02537000 | 8.65144000  | 12.06136000 | #O  |
| 5.02535000 | 12.53692000 | 12.05977000 | #O  |
| 3.53999000 | 10.59682000 | 10.76707000 | #O  |
| 3.55121000 | 7.34148000  | 10.07271000 | #O  |
| 5.01776000 | 11.84325000 | 8.75510000  | #O  |
| 5.01892000 | 9.33838000  | 8.76830000  | #O  |
| 3.54600000 | 7.34749000  | 7.45939000  | #O  |
| 3.53988000 | 10.57622000 | 6.75894000  | #O  |
| 5.02323000 | 8.63145000  | 5.45625000  | #O  |
| 5.02119000 | 12.52474000 | 5.46230000  | #O  |
| 3.54165000 | 10.58075000 | 4.18366000  | #O  |
| 3.54443000 | 7.33166000  | 3.47478000  | #O  |
| 5.02258000 | 11.79907000 | 2.02620000  | #O  |
| 5.02300000 | 9.35969000  | 2.02975000  | #O  |
| 3.54414000 | 7.32782000  | 0.89201000  | #O  |
| 6.50125000 | 4.10953000  | 15.12067000 | #Ti |
| 7.96733000 | 0.86401000  | 15.53191000 | #Ti |
| 6.49434000 | 0.82980000  | 12.16608000 | #Ti |
| 7.97365000 | 4.07345000  | 11.89929000 | #Ti |
| 6.43936000 | 4.09597000  | 8.78859000  | #Ti |
| 7.83152000 | 0.85110000  | 8.75765000  | #Ti |

|            |             |             |     |
|------------|-------------|-------------|-----|
| 6.49582000 | 0.80328000  | 5.34128000  | #Ti |
| 7.97379000 | 4.04308000  | 5.57232000  | #Ti |
| 6.50190000 | 4.08375000  | 2.38103000  | #Ti |
| 7.98179000 | 0.83601000  | 1.97774000  | #Ti |
| 0.57132000 | 4.10690000  | 15.12645000 | #Ti |
| 2.04272000 | 0.84592000  | 15.50850000 | #Ti |
| 0.57341000 | 0.82974000  | 12.15805000 | #Ti |
| 2.08933000 | 4.07005000  | 12.04369000 | #Ti |
| 0.53094000 | 4.09602000  | 8.78660000  | #Ti |
| 1.91524000 | 0.84764000  | 8.75272000  | #Ti |
| 0.57904000 | 0.80291000  | 5.33908000  | #Ti |
| 2.05745000 | 4.04361000  | 5.57906000  | #Ti |
| 0.58463000 | 4.08370000  | 2.38129000  | #Ti |
| 2.06426000 | 0.83718000  | 1.97760000  | #Ti |
| 3.52449000 | 4.10588000  | 15.34098000 | #Ti |
| 5.01371000 | 0.85722000  | 15.51913000 | #Ti |
| 3.53280000 | 0.81901000  | 12.16499000 | #Ti |
| 4.97657000 | 4.06642000  | 12.03973000 | #Ti |
| 3.48509000 | 4.09507000  | 8.79814000  | #Ti |
| 4.87346000 | 0.84750000  | 8.76028000  | #Ti |
| 3.53777000 | 0.80356000  | 5.34139000  | #Ti |
| 5.01440000 | 4.04468000  | 5.57950000  | #Ti |
| 3.54335000 | 4.08481000  | 2.38296000  | #Ti |
| 5.02287000 | 0.83718000  | 1.97965000  | #Ti |
| 6.49993000 | 10.60037000 | 15.16146000 | #Ti |
| 7.96687000 | 7.34757000  | 15.53668000 | #Ti |
| 6.49334000 | 7.32296000  | 12.16251000 | #Ti |
| 7.97112000 | 10.56973000 | 11.96502000 | #Ti |
| 6.44092000 | 10.59243000 | 8.76161000  | #Ti |
| 7.83228000 | 7.34053000  | 8.75985000  | #Ti |
| 6.49673000 | 7.29868000  | 5.33844000  | #Ti |
| 7.97336000 | 10.54154000 | 5.55959000  | #Ti |
| 6.50095000 | 10.58038000 | 2.36779000  | #Ti |
| 7.98257000 | 7.32993000  | 1.97496000  | #Ti |
| 0.57479000 | 10.60747000 | 15.15942000 | #Ti |
| 2.05850000 | 7.37853000  | 15.50757000 | #Ti |
| 0.57559000 | 7.32437000  | 12.16619000 | #Ti |
| 2.05321000 | 10.56764000 | 11.96254000 | #Ti |
| 0.52171000 | 10.59166000 | 8.76244000  | #Ti |
| 1.91408000 | 7.34274000  | 8.75700000  | #Ti |
| 0.57861000 | 7.29857000  | 5.33879000  | #Ti |
| 2.05562000 | 10.54111000 | 5.56080000  | #Ti |
| 0.58333000 | 10.57982000 | 2.36783000  | #Ti |
| 2.06476000 | 7.33042000  | 1.97703000  | #Ti |
| 3.54212000 | 10.60577000 | 15.15756000 | #Ti |
| 5.01937000 | 7.35893000  | 15.52310000 | #Ti |
| 3.53649000 | 7.32664000  | 12.15946000 | #Ti |
| 5.01402000 | 10.57022000 | 11.96349000 | #Ti |
| 3.48140000 | 10.59154000 | 8.76205000  | #Ti |
| 4.87394000 | 7.34297000  | 8.75630000  | #Ti |
| 3.53693000 | 7.29895000  | 5.33999000  | #Ti |
| 5.01466000 | 10.54042000 | 5.56013000  | #Ti |
| 3.54198000 | 10.58109000 | 2.36872000  | #Ti |
| 5.02360000 | 7.33054000  | 1.97770000  | #Ti |

Rut-Cys-D

1.000000000

8.876100 0.000000 0.000000  
0.000000 12.992946 0.000000  
0.000000 0.000000 30.000000

H C N O S Ti

7 3 1 122 1 60

Cartesian

7.71292000 4.88084000 19.47598000 #H  
6.84946000 5.04894000 21.01810000 #H  
7.21028000 2.39349000 19.11007000 #H  
6.54197000 6.94029000 17.62272000 #H  
4.72518000 6.78183000 18.59274000 #H  
5.79265000 6.99147000 19.84755000 #H  
4.65618000 4.72965000 19.87469000 #H  
6.81927000 4.56557000 20.03031000 #C  
5.44028000 4.35951000 17.91122000 #C  
5.55176000 5.00438000 19.29345000 #C  
5.61674000 6.46120000 18.99166000 #N  
6.54250000 4.13336000 17.31042000 #O  
4.28206000 4.21415000 17.40173000 #O  
0.91174000 0.78882000 16.61753000 #O  
2.36841000 5.29232000 15.45799000 #O  
2.38292000 2.82098000 15.47114000 #O  
0.91725000 0.77932000 14.03611000 #O  
0.91559000 4.03730000 13.30837000 #O  
2.39137000 2.07855000 12.04440000 #O  
2.38281000 6.01026000 12.06779000 #O  
0.91461000 4.04794000 10.76230000 #O  
0.91768000 0.77615000 10.05276000 #O  
2.39590000 5.29141000 8.76000000 #O  
2.39421000 2.78078000 8.76859000 #O  
0.92034000 0.78244000 7.44920000 #O  
0.91259000 4.04116000 6.76684000 #O  
2.39339000 2.08248000 5.45660000 #O  
2.39462000 5.98586000 5.44276000 #O  
0.91311000 4.03573000 4.19044000 #O  
0.91527000 0.77272000 3.47527000 #O  
2.39518000 5.25102000 2.02233000 #O  
2.39424000 2.80914000 2.04042000 #O  
0.91511000 0.78553000 0.89449000 #O  
3.88269000 0.82126000 16.60439000 #O  
5.36178000 5.31191000 15.21597000 #O  
5.34224000 2.78254000 15.28434000 #O  
3.85563000 0.73975000 14.02858000 #O  
3.83006000 4.03811000 13.35647000 #O  
5.34972000 2.07668000 12.08090000 #O  
5.34906000 6.01160000 12.10838000 #O  
3.89800000 4.05183000 10.78796000 #O  
3.87821000 0.77552000 10.05423000 #O  
5.34360000 5.29350000 8.75459000 #O  
5.34609000 2.78056000 8.76154000 #O  
3.87765000 0.77996000 7.44830000 #O  
3.86844000 4.03624000 6.76860000 #O  
5.35332000 2.08121000 5.46090000 #O

|            |             |             |    |
|------------|-------------|-------------|----|
| 5.34923000 | 5.98655000  | 5.44665000  | #O |
| 3.87372000 | 4.03173000  | 4.19163000  | #O |
| 3.87561000 | 0.77485000  | 3.47425000  | #O |
| 5.35222000 | 5.25107000  | 2.02649000  | #O |
| 5.35412000 | 2.80934000  | 2.03916000  | #O |
| 3.87373000 | 0.78326000  | 0.89331000  | #O |
| 6.82533000 | 0.84191000  | 16.60869000 | #O |
| 8.34096000 | 5.29410000  | 15.41821000 | #O |
| 8.34306000 | 2.81703000  | 15.44404000 | #O |
| 6.84845000 | 0.74053000  | 14.02997000 | #O |
| 6.86946000 | 4.02732000  | 13.33697000 | #O |
| 8.31274000 | 2.07970000  | 12.04210000 | #O |
| 8.31132000 | 6.00952000  | 12.07809000 | #O |
| 6.79937000 | 4.05112000  | 10.77975000 | #O |
| 6.83482000 | 0.77795000  | 10.05427000 | #O |
| 8.30258000 | 5.28761000  | 8.76238000  | #O |
| 8.30371000 | 2.78162000  | 8.76466000  | #O |
| 6.83923000 | 0.77914000  | 7.44959000  | #O |
| 6.82979000 | 4.04067000  | 6.76859000  | #O |
| 8.31152000 | 2.08480000  | 5.45936000  | #O |
| 8.30779000 | 5.98752000  | 5.44181000  | #O |
| 6.83004000 | 4.03311000  | 4.19268000  | #O |
| 6.83472000 | 0.77517000  | 3.47550000  | #O |
| 8.31032000 | 5.25106000  | 2.02659000  | #O |
| 8.31270000 | 2.80933000  | 2.04316000  | #O |
| 6.83279000 | 0.78369000  | 0.89507000  | #O |
| 0.90417000 | 7.28667000  | 16.67710000 | #O |
| 2.39123000 | 11.75805000 | 15.49822000 | #O |
| 2.38810000 | 9.32677000  | 15.56031000 | #O |
| 0.89078000 | 7.33515000  | 14.09247000 | #O |
| 0.91098000 | 10.52243000 | 13.35066000 | #O |
| 2.38246000 | 8.58555000  | 12.04417000 | #O |
| 2.38686000 | 12.47043000 | 12.04543000 | #O |
| 0.90964000 | 10.52811000 | 10.76138000 | #O |
| 0.91403000 | 7.27899000  | 10.02801000 | #O |
| 2.38871000 | 11.77282000 | 8.75478000  | #O |
| 2.39345000 | 9.26479000  | 8.75955000  | #O |
| 0.91246000 | 7.27991000  | 7.44196000  | #O |
| 0.91149000 | 10.51421000 | 6.75266000  | #O |
| 2.39428000 | 8.57738000  | 5.43590000  | #O |
| 2.39348000 | 12.47006000 | 5.45820000  | #O |
| 0.91279000 | 10.52455000 | 4.17518000  | #O |
| 0.91607000 | 7.27954000  | 3.44100000  | #O |
| 2.39437000 | 11.74030000 | 2.01867000  | #O |
| 2.39460000 | 9.29943000  | 2.01259000  | #O |
| 0.91292000 | 7.27434000  | 0.85426000  | #O |
| 3.92956000 | 7.24888000  | 16.62040000 | #O |
| 5.35194000 | 11.74719000 | 15.51380000 | #O |
| 5.35209000 | 9.31470000  | 15.50012000 | #O |
| 3.82156000 | 7.36511000  | 14.08492000 | #O |
| 3.86603000 | 10.52697000 | 13.34477000 | #O |
| 5.34639000 | 8.59063000  | 12.04675000 | #O |
| 5.35088000 | 12.47323000 | 12.04486000 | #O |
| 3.86590000 | 10.52745000 | 10.76466000 | #O |
| 3.87994000 | 7.27718000  | 10.05648000 | #O |

|            |             |             |     |
|------------|-------------|-------------|-----|
| 5.34835000 | 11.77297000 | 8.75392000  | #O  |
| 5.34273000 | 9.26615000  | 8.76312000  | #O  |
| 3.86729000 | 7.28339000  | 7.44692000  | #O  |
| 3.87029000 | 10.51710000 | 6.75319000  | #O  |
| 5.34975000 | 8.57727000  | 5.43899000  | #O  |
| 5.35358000 | 12.47023000 | 5.45708000  | #O  |
| 3.87138000 | 10.52548000 | 4.17512000  | #O  |
| 3.87302000 | 7.27949000  | 3.43563000  | #O  |
| 5.35260000 | 11.73966000 | 2.02079000  | #O  |
| 5.35164000 | 9.29916000  | 2.01235000  | #O  |
| 3.87306000 | 7.27316000  | 0.85384000  | #O  |
| 6.80100000 | 7.23363000  | 16.67597000 | #O  |
| 8.30753000 | 11.75259000 | 15.50656000 | #O  |
| 8.30762000 | 9.31656000  | 15.54103000 | #O  |
| 6.84576000 | 7.37556000  | 14.06383000 | #O  |
| 6.82851000 | 10.52774000 | 13.34226000 | #O  |
| 8.31571000 | 8.58963000  | 12.04758000 | #O  |
| 8.31535000 | 12.47229000 | 12.04737000 | #O  |
| 6.82713000 | 10.52779000 | 10.76216000 | #O  |
| 6.82571000 | 7.27814000  | 10.06044000 | #O  |
| 8.30638000 | 11.77321000 | 8.75602000  | #O  |
| 8.30487000 | 9.26920000  | 8.75651000  | #O  |
| 6.82386000 | 7.28363000  | 7.46424000  | #O  |
| 6.82829000 | 10.51529000 | 6.75331000  | #O  |
| 8.30833000 | 8.57497000  | 5.43662000  | #O  |
| 8.31151000 | 12.46909000 | 5.45979000  | #O  |
| 6.83029000 | 10.52419000 | 4.17496000  | #O  |
| 6.82758000 | 7.28088000  | 3.44213000  | #O  |
| 8.31108000 | 11.74051000 | 2.02186000  | #O  |
| 8.31206000 | 9.29972000  | 2.01322000  | #O  |
| 6.83484000 | 7.27139000  | 0.85616000  | #O  |
| 6.89513000 | 2.77889000  | 20.36722000 | #S  |
| 0.92611000 | 4.05662000  | 15.10374000 | #Ti |
| 2.39051000 | 0.79822000  | 15.52590000 | #Ti |
| 0.90151000 | 0.80631000  | 12.16449000 | #Ti |
| 2.43146000 | 4.03765000  | 11.99131000 | #Ti |
| 0.88424000 | 4.02370000  | 8.81426000  | #Ti |
| 2.25037000 | 0.78529000  | 8.75483000  | #Ti |
| 0.91314000 | 0.79736000  | 5.34429000  | #Ti |
| 2.39231000 | 4.04833000  | 5.58611000  | #Ti |
| 0.91466000 | 4.02921000  | 2.38347000  | #Ti |
| 2.39396000 | 0.78244000  | 1.98122000  | #Ti |
| 3.88825000 | 4.03171000  | 15.37491000 | #Ti |
| 5.35176000 | 0.78419000  | 15.50605000 | #Ti |
| 3.87213000 | 0.80017000  | 12.16759000 | #Ti |
| 5.33836000 | 4.06035000  | 12.17812000 | #Ti |
| 3.84734000 | 4.03574000  | 8.84156000  | #Ti |
| 5.20764000 | 0.78314000  | 8.75387000  | #Ti |
| 3.86798000 | 0.79521000  | 5.34539000  | #Ti |
| 5.34687000 | 4.04951000  | 5.59487000  | #Ti |
| 3.87365000 | 4.02817000  | 2.38368000  | #Ti |
| 5.35177000 | 0.78250000  | 1.98198000  | #Ti |
| 6.84995000 | 4.03100000  | 15.30747000 | #Ti |
| 8.31186000 | 0.79148000  | 15.52225000 | #Ti |
| 6.82558000 | 0.80171000  | 12.16495000 | #Ti |

|            |             |             |     |
|------------|-------------|-------------|-----|
| 8.26881000 | 4.05757000  | 11.96133000 | #Ti |
| 6.79317000 | 4.02972000  | 8.83666000  | #Ti |
| 8.16742000 | 0.78666000  | 8.75529000  | #Ti |
| 6.82065000 | 0.79660000  | 5.34500000  | #Ti |
| 8.30402000 | 4.03715000  | 5.58708000  | #Ti |
| 6.83190000 | 4.02849000  | 2.38513000  | #Ti |
| 8.31115000 | 0.78248000  | 1.98278000  | #Ti |
| 0.91159000 | 10.54515000 | 15.16797000 | #Ti |
| 2.44519000 | 7.29329000  | 15.56805000 | #Ti |
| 0.92790000 | 7.29811000  | 12.23473000 | #Ti |
| 2.38239000 | 10.56370000 | 11.96826000 | #Ti |
| 0.86578000 | 10.52557000 | 8.76280000  | #Ti |
| 2.29048000 | 7.26921000  | 8.64376000  | #Ti |
| 0.90404000 | 7.28927000  | 5.30000000  | #Ti |
| 2.38807000 | 10.53938000 | 5.55549000  | #Ti |
| 0.91405000 | 10.52263000 | 2.36074000  | #Ti |
| 2.39254000 | 7.27138000  | 1.93777000  | #Ti |
| 3.87022000 | 10.53644000 | 15.15936000 | #Ti |
| 5.25339000 | 7.28100000  | 15.26048000 | #Ti |
| 3.85927000 | 7.30041000  | 11.87738000 | #Ti |
| 5.34319000 | 10.54873000 | 11.96282000 | #Ti |
| 3.82318000 | 10.52044000 | 8.76598000  | #Ti |
| 5.35275000 | 7.27685000  | 8.60084000  | #Ti |
| 3.86826000 | 7.28932000  | 5.28103000  | #Ti |
| 5.34520000 | 10.53735000 | 5.55548000  | #Ti |
| 3.87248000 | 10.52291000 | 2.36046000  | #Ti |
| 5.35450000 | 7.27101000  | 1.93604000  | #Ti |
| 6.82759000 | 10.51822000 | 15.15704000 | #Ti |
| 8.37166000 | 7.29032000  | 15.56962000 | #Ti |
| 6.83018000 | 7.30772000  | 12.17418000 | #Ti |
| 8.30390000 | 10.54743000 | 11.96197000 | #Ti |
| 6.78446000 | 10.52768000 | 8.76208000  | #Ti |
| 8.26739000 | 7.26903000  | 8.88230000  | #Ti |
| 6.83607000 | 7.28872000  | 5.29501000  | #Ti |
| 8.30485000 | 10.55134000 | 5.55516000  | #Ti |
| 6.83119000 | 10.52159000 | 2.36096000  | #Ti |
| 8.31388000 | 7.27093000  | 1.94432000  | #Ti |

Rut-Cys-Z

1.000000000

8.876100 0.000000 0.000000

0.000000 12.992946 0.000000

0.000000 0.000000 30.000000

H C N O S Ti

7 3 1 122 1 60

Cartesian

7.63180000 5.03907000 19.42495000 #H

6.75440000 5.36099000 20.94323000 #H

7.07347000 2.53334000 19.28921000 #H

6.23252000 6.79302000 18.00938000 #H

4.59476000 6.78017000 18.18732000 #H

5.52409000 7.19222000 19.56099000 #H

4.56612000 4.90983000 19.79619000 #H

6.73586000 4.78494000 20.00662000 #C



|            |            |             |    |
|------------|------------|-------------|----|
| 5.39540000 | 4.33514000 | 17.88214000 | #C |
| 5.47248000 | 5.10656000 | 19.20840000 | #C |
| 5.45561000 | 6.54888000 | 18.76836000 | #N |
| 6.51855000 | 4.08765000 | 17.33951000 | #O |
| 4.24280000 | 4.15016000 | 17.39063000 | #O |
| 0.92078000 | 0.76941000 | 16.63117000 | #O |
| 2.37767000 | 5.25768000 | 15.46213000 | #O |
| 2.38294000 | 2.78861000 | 15.45530000 | #O |
| 0.92774000 | 0.74721000 | 14.04816000 | #O |
| 0.92519000 | 4.03418000 | 13.30982000 | #O |
| 2.40132000 | 2.07110000 | 12.05963000 | #O |
| 2.40205000 | 5.99817000 | 12.06427000 | #O |
| 0.92241000 | 4.03585000 | 10.76397000 | #O |
| 0.92507000 | 0.77702000 | 10.06529000 | #O |
| 2.40378000 | 5.28829000 | 8.76539000  | #O |
| 2.40138000 | 2.77748000 | 8.77204000  | #O |
| 0.92792000 | 0.77769000 | 7.46193000  | #O |
| 0.91896000 | 4.03820000 | 6.77225000  | #O |
| 2.39956000 | 2.07995000 | 5.46947000  | #O |
| 2.40126000 | 5.98246000 | 5.45404000  | #O |
| 0.91844000 | 4.03176000 | 4.19830000  | #O |
| 0.92016000 | 0.76797000 | 3.48915000  | #O |
| 2.39753000 | 5.24383000 | 2.02571000  | #O |
| 2.39776000 | 2.80286000 | 2.05383000  | #O |
| 0.91693000 | 0.77798000 | 0.90963000  | #O |
| 3.89210000 | 0.80555000 | 16.61731000 | #O |
| 5.36717000 | 5.27979000 | 15.24265000 | #O |
| 5.35185000 | 2.75089000 | 15.27428000 | #O |
| 3.86552000 | 0.71347000 | 14.03963000 | #O |
| 3.84124000 | 4.02856000 | 13.35014000 | #O |
| 5.36116000 | 2.06956000 | 12.09601000 | #O |
| 5.36502000 | 5.99902000 | 12.10756000 | #O |
| 3.90762000 | 4.04068000 | 10.78625000 | #O |
| 3.88692000 | 0.77447000 | 10.06685000 | #O |
| 5.35211000 | 5.28919000 | 8.76304000  | #O |
| 5.35471000 | 2.77717000 | 8.76410000  | #O |
| 3.88619000 | 0.77364000 | 7.46133000  | #O |
| 3.87513000 | 4.03511000 | 6.77365000  | #O |
| 5.35878000 | 2.07899000 | 5.47067000  | #O |
| 5.35630000 | 5.98313000 | 5.45982000  | #O |
| 3.87849000 | 4.03089000 | 4.19821000  | #O |
| 3.88301000 | 0.76850000 | 3.48845000  | #O |
| 5.35610000 | 5.24510000 | 2.03029000  | #O |
| 5.35543000 | 2.80441000 | 2.04721000  | #O |
| 3.87484000 | 0.77622000 | 0.90818000  | #O |
| 6.83295000 | 0.81917000 | 16.62291000 | #O |
| 8.34160000 | 5.25733000 | 15.43999000 | #O |
| 8.34556000 | 2.78572000 | 15.44164000 | #O |
| 6.85908000 | 0.71195000 | 14.04116000 | #O |
| 6.87643000 | 4.02416000 | 13.34086000 | #O |
| 8.32279000 | 2.07245000 | 12.06635000 | #O |
| 8.32545000 | 5.99895000 | 12.08028000 | #O |
| 6.81261000 | 4.04309000 | 10.78255000 | #O |
| 6.84381000 | 0.77841000 | 10.06622000 | #O |
| 8.31196000 | 5.28368000 | 8.76787000  | #O |

|            |             |             |    |
|------------|-------------|-------------|----|
| 8.31116000 | 2.77757000  | 8.76713000  | #O |
| 6.84571000 | 0.77343000  | 7.46031000  | #O |
| 6.83550000 | 4.03770000  | 6.77378000  | #O |
| 8.31737000 | 2.08278000  | 5.47102000  | #O |
| 8.31450000 | 5.98448000  | 5.45614000  | #O |
| 6.83514000 | 4.02991000  | 4.19904000  | #O |
| 6.84185000 | 0.77049000  | 3.48799000  | #O |
| 8.31377000 | 5.24544000  | 2.03719000  | #O |
| 8.31502000 | 2.80476000  | 2.04618000  | #O |
| 6.83418000 | 0.77710000  | 0.90921000  | #O |
| 0.91596000 | 7.25515000  | 16.69290000 | #O |
| 2.40580000 | 11.72906000 | 15.52628000 | #O |
| 2.40074000 | 9.29860000  | 15.56454000 | #O |
| 0.93482000 | 7.30421000  | 14.10114000 | #O |
| 0.92326000 | 10.51726000 | 13.36183000 | #O |
| 2.40022000 | 8.57926000  | 12.05859000 | #O |
| 2.39813000 | 12.46306000 | 12.04808000 | #O |
| 0.92036000 | 10.51614000 | 10.77214000 | #O |
| 0.92420000 | 7.27666000  | 10.02546000 | #O |
| 2.39543000 | 11.77011000 | 8.76919000  | #O |
| 2.40287000 | 9.26376000  | 8.76459000  | #O |
| 0.92397000 | 7.27896000  | 7.44713000  | #O |
| 0.91830000 | 10.51225000 | 6.76511000  | #O |
| 2.40003000 | 8.57490000  | 5.44459000  | #O |
| 2.39929000 | 12.46797000 | 5.47333000  | #O |
| 0.91749000 | 10.52364000 | 4.18883000  | #O |
| 0.92157000 | 7.27316000  | 3.45533000  | #O |
| 2.39648000 | 11.73627000 | 2.03275000  | #O |
| 2.39713000 | 9.29625000  | 2.02214000  | #O |
| 0.91286000 | 7.26974000  | 0.87017000  | #O |
| 3.92621000 | 7.21149000  | 16.65758000 | #O |
| 5.35962000 | 11.72250000 | 15.53263000 | #O |
| 5.36713000 | 9.29197000  | 15.52497000 | #O |
| 3.85743000 | 7.34456000  | 14.09463000 | #O |
| 3.88069000 | 10.51926000 | 13.35391000 | #O |
| 5.36505000 | 8.58136000  | 12.06073000 | #O |
| 5.36167000 | 12.46560000 | 12.04816000 | #O |
| 3.87656000 | 10.51766000 | 10.77435000 | #O |
| 3.89542000 | 7.27686000  | 10.06843000 | #O |
| 5.35750000 | 11.76988000 | 8.76790000  | #O |
| 5.35175000 | 9.26314000  | 8.76921000  | #O |
| 3.87829000 | 7.28014000  | 7.45400000  | #O |
| 3.87587000 | 10.51705000 | 6.76402000  | #O |
| 5.35594000 | 8.57543000  | 5.44824000  | #O |
| 5.35963000 | 12.46827000 | 5.47006000  | #O |
| 3.87699000 | 10.52425000 | 4.18747000  | #O |
| 3.87861000 | 7.27112000  | 3.44866000  | #O |
| 5.35605000 | 11.73431000 | 2.02985000  | #O |
| 5.35471000 | 9.29475000  | 2.02847000  | #O |
| 3.87337000 | 7.27042000  | 0.86834000  | #O |
| 6.81420000 | 7.19875000  | 16.68360000 | #O |
| 8.32110000 | 11.72757000 | 15.53002000 | #O |
| 8.31891000 | 9.29505000  | 15.54913000 | #O |
| 6.86308000 | 7.34514000  | 14.07228000 | #O |
| 6.84028000 | 10.52159000 | 13.35375000 | #O |

|            |             |             |     |
|------------|-------------|-------------|-----|
| 8.33147000 | 8.58055000  | 12.07392000 | #O  |
| 8.32534000 | 12.46438000 | 12.04932000 | #O  |
| 6.83983000 | 10.51426000 | 10.77334000 | #O  |
| 6.84068000 | 7.27829000  | 10.07661000 | #O  |
| 8.31496000 | 11.77015000 | 8.76638000  | #O  |
| 8.31268000 | 9.26583000  | 8.76485000  | #O  |
| 6.83147000 | 7.28028000  | 7.47766000  | #O  |
| 6.83308000 | 10.51139000 | 6.76504000  | #O  |
| 8.31380000 | 8.57361000  | 5.45049000  | #O  |
| 8.31850000 | 12.46756000 | 5.47548000  | #O  |
| 6.83736000 | 10.52622000 | 4.18833000  | #O  |
| 6.83237000 | 7.27329000  | 3.45904000  | #O  |
| 8.31491000 | 11.73294000 | 2.02935000  | #O  |
| 8.31450000 | 9.29389000  | 2.03076000  | #O  |
| 6.83648000 | 7.26839000  | 0.87314000  | #O  |
| 6.80731000 | 3.03968000  | 20.51598000 | #S  |
| 0.92472000 | 4.03789000  | 15.10795000 | #Ti |
| 2.39763000 | 0.76624000  | 15.53588000 | #Ti |
| 0.91289000 | 0.81409000  | 12.17548000 | #Ti |
| 2.43259000 | 4.05976000  | 11.97940000 | #Ti |
| 0.88680000 | 4.01967000  | 8.81111000  | #Ti |
| 2.25743000 | 0.78222000  | 8.76698000  | #Ti |
| 0.91712000 | 0.79739000  | 5.35958000  | #Ti |
| 2.39771000 | 4.04937000  | 5.58933000  | #Ti |
| 0.91710000 | 4.02384000  | 2.39077000  | #Ti |
| 2.39209000 | 0.77657000  | 1.99812000  | #Ti |
| 3.88384000 | 3.99199000  | 15.31379000 | #Ti |
| 5.35969000 | 0.75351000  | 15.51713000 | #Ti |
| 3.87622000 | 0.80802000  | 12.17892000 | #Ti |
| 5.35176000 | 4.07739000  | 12.15021000 | #Ti |
| 3.85035000 | 4.03383000  | 8.83243000  | #Ti |
| 5.21491000 | 0.77961000  | 8.76584000  | #Ti |
| 3.87357000 | 0.79546000  | 5.36008000  | #Ti |
| 5.35327000 | 4.05117000  | 5.59710000  | #Ti |
| 3.87619000 | 4.02402000  | 2.38977000  | #Ti |
| 5.35005000 | 0.77618000  | 1.99707000  | #Ti |
| 6.84639000 | 4.00021000  | 15.28580000 | #Ti |
| 8.32058000 | 0.76925000  | 15.53283000 | #Ti |
| 6.83640000 | 0.81728000  | 12.17771000 | #Ti |
| 8.28293000 | 4.08076000  | 11.96966000 | #Ti |
| 6.79777000 | 4.02508000  | 8.83307000  | #Ti |
| 8.17388000 | 0.78094000  | 8.76658000  | #Ti |
| 6.82547000 | 0.79523000  | 5.35942000  | #Ti |
| 8.30997000 | 4.03840000  | 5.59134000  | #Ti |
| 6.83448000 | 4.02264000  | 2.39084000  | #Ti |
| 8.30912000 | 0.77559000  | 1.99795000  | #Ti |
| 0.92310000 | 10.51439000 | 15.17893000 | #Ti |
| 2.40860000 | 7.25914000  | 15.59805000 | #Ti |
| 0.93878000 | 7.30476000  | 12.28587000 | #Ti |
| 2.39255000 | 10.56775000 | 11.97732000 | #Ti |
| 0.87276000 | 10.52164000 | 8.77576000  | #Ti |
| 2.28701000 | 7.26894000  | 8.67196000  | #Ti |
| 0.90945000 | 7.29085000  | 5.31950000  | #Ti |
| 2.39349000 | 10.54298000 | 5.56826000  | #Ti |
| 0.91732000 | 10.51830000 | 2.37532000  | #Ti |

|            |             |             |     |
|------------|-------------|-------------|-----|
| 2.39000000 | 7.26776000  | 1.95423000  | #Ti |
| 3.88117000 | 10.50315000 | 15.16766000 | #Ti |
| 5.27509000 | 7.25909000  | 15.27452000 | #Ti |
| 3.87215000 | 7.31101000  | 11.90326000 | #Ti |
| 5.35348000 | 10.57007000 | 11.97250000 | #Ti |
| 3.83055000 | 10.51906000 | 8.77703000  | #Ti |
| 5.34318000 | 7.27352000  | 8.61106000  | #Ti |
| 3.87187000 | 7.29074000  | 5.29697000  | #Ti |
| 5.35128000 | 10.53799000 | 5.56744000  | #Ti |
| 3.87593000 | 10.51930000 | 2.37382000  | #Ti |
| 5.35220000 | 7.26663000  | 1.95197000  | #Ti |
| 6.84167000 | 10.50326000 | 15.16808000 | #Ti |
| 8.27961000 | 7.26187000  | 15.63002000 | #Ti |
| 6.84471000 | 7.32811000  | 12.16089000 | #Ti |
| 8.31458000 | 10.56545000 | 11.97436000 | #Ti |
| 6.79118000 | 10.52083000 | 8.77469000  | #Ti |
| 8.26993000 | 7.26666000  | 8.88248000  | #Ti |
| 6.84044000 | 7.28838000  | 5.31304000  | #Ti |
| 8.31065000 | 10.55167000 | 5.56999000  | #Ti |
| 6.83481000 | 10.51684000 | 2.37502000  | #Ti |
| 8.31280000 | 7.26689000  | 1.96416000  | #Ti |

Rut-Cys-C

1.000000000

|          |           |           |
|----------|-----------|-----------|
| 8.876100 | 0.000000  | 0.000000  |
| 0.000000 | 12.992946 | 0.000000  |
| 0.000000 | 0.000000  | 30.000000 |

H C N O S Ti

7 3 1 122 1 60

Cartesian

|            |            |             |    |
|------------|------------|-------------|----|
| 2.48440000 | 3.43637000 | 17.70349000 | #H |
| 3.95694000 | 2.81918000 | 17.64522000 | #H |
| 2.62823000 | 2.61878000 | 20.95304000 | #H |
| 7.49985000 | 4.99544000 | 18.11374000 | #H |
| 3.11728000 | 5.46288000 | 18.66143000 | #H |
| 5.49335000 | 5.61580000 | 19.57429000 | #H |
| 5.18879000 | 6.08633000 | 17.88110000 | #H |
| 3.82577000 | 4.61583000 | 18.69561000 | #C |
| 3.62555000 | 3.97761000 | 20.08260000 | #C |
| 5.20934000 | 5.25197000 | 18.57953000 | #C |
| 3.46030000 | 3.71951000 | 17.57492000 | #N |
| 4.15261000 | 4.37153000 | 21.10324000 | #O |
| 2.73398000 | 2.94761000 | 20.03576000 | #O |
| 6.51605000 | 0.88711000 | 16.61186000 | #O |
| 8.02249000 | 5.35346000 | 15.45224000 | #O |
| 8.02308000 | 2.88966000 | 15.47839000 | #O |
| 6.53316000 | 0.83184000 | 14.03811000 | #O |
| 6.53898000 | 4.12816000 | 13.36836000 | #O |
| 8.00088000 | 2.16383000 | 12.06184000 | #O |
| 6.49052000 | 4.11475000 | 10.78717000 | #O |
| 6.52875000 | 0.86941000 | 10.06747000 | #O |
| 7.99452000 | 5.36778000 | 8.77154000  | #O |
| 7.99722000 | 2.86137000 | 8.77189000  | #O |
| 6.52584000 | 0.86488000 | 7.45883000  | #O |

|            |             |             |    |
|------------|-------------|-------------|----|
| 6.52185000 | 4.11147000  | 6.77604000  | #O |
| 7.99998000 | 2.16038000  | 5.46499000  | #O |
| 8.00008000 | 6.05948000  | 5.45953000  | #O |
| 6.52153000 | 4.11042000  | 4.19996000  | #O |
| 6.52009000 | 0.86400000  | 3.47437000  | #O |
| 8.00214000 | 5.33519000  | 2.04185000  | #O |
| 8.00215000 | 2.89611000  | 2.04227000  | #O |
| 6.52376000 | 0.87170000  | 0.89266000  | #O |
| 0.61595000 | 0.87680000  | 16.61971000 | #O |
| 2.05454000 | 5.33774000  | 15.51530000 | #O |
| 2.03767000 | 2.86905000  | 15.39640000 | #O |
| 0.59638000 | 0.83547000  | 14.03805000 | #O |
| 0.59802000 | 4.13275000  | 13.30269000 | #O |
| 2.08254000 | 2.16071000  | 12.06604000 | #O |
| 2.08396000 | 6.07473000  | 12.05297000 | #O |
| 0.60359000 | 4.11557000  | 10.76746000 | #O |
| 0.61028000 | 0.86434000  | 10.06314000 | #O |
| 2.08458000 | 5.37003000  | 8.77272000  | #O |
| 2.08428000 | 2.86238000  | 8.77356000  | #O |
| 0.60914000 | 0.86730000  | 7.45670000  | #O |
| 0.60414000 | 4.11215000  | 6.77293000  | #O |
| 2.08403000 | 2.16064000  | 5.46203000  | #O |
| 2.08343000 | 6.05992000  | 5.45637000  | #O |
| 0.60402000 | 4.11118000  | 4.19739000  | #O |
| 0.60398000 | 0.86244000  | 3.47510000  | #O |
| 2.08657000 | 5.33581000  | 2.04173000  | #O |
| 2.08616000 | 2.89655000  | 2.04095000  | #O |
| 0.60602000 | 0.87303000  | 0.89379000  | #O |
| 3.57216000 | 0.92609000  | 16.60778000 | #O |
| 5.02636000 | 5.35460000  | 15.45123000 | #O |
| 5.05329000 | 2.87034000  | 15.38677000 | #O |
| 3.55869000 | 0.81403000  | 14.03065000 | #O |
| 3.53912000 | 4.12773000  | 13.37146000 | #O |
| 5.04235000 | 2.16004000  | 12.09207000 | #O |
| 5.04248000 | 6.07509000  | 12.07896000 | #O |
| 3.58458000 | 4.11456000  | 10.78918000 | #O |
| 3.57341000 | 0.86521000  | 10.06545000 | #O |
| 5.03961000 | 5.37020000  | 8.76560000  | #O |
| 5.03816000 | 2.86010000  | 8.76522000  | #O |
| 3.56540000 | 0.86437000  | 7.45624000  | #O |
| 3.55915000 | 4.11308000  | 6.77565000  | #O |
| 5.04296000 | 2.15995000  | 5.46650000  | #O |
| 5.04182000 | 6.05975000  | 5.45928000  | #O |
| 3.56448000 | 4.11123000  | 4.20028000  | #O |
| 3.56402000 | 0.86047000  | 3.47483000  | #O |
| 5.04413000 | 5.33627000  | 2.04444000  | #O |
| 5.04333000 | 2.89632000  | 2.03945000  | #O |
| 3.56363000 | 0.87149000  | 0.89232000  | #O |
| 6.51079000 | 7.35481000  | 16.59682000 | #O |
| 8.00376000 | 11.82954000 | 15.51736000 | #O |
| 8.00080000 | 9.39638000  | 15.49016000 | #O |
| 6.52385000 | 7.38950000  | 14.03094000 | #O |
| 6.52124000 | 10.61887000 | 13.34096000 | #O |
| 8.00495000 | 8.67250000  | 12.05830000 | #O |
| 8.00154000 | 12.55361000 | 12.04738000 | #O |

|            |             |             |    |
|------------|-------------|-------------|----|
| 6.52176000 | 10.60807000 | 10.76078000 | #O |
| 6.52948000 | 7.37085000  | 10.06761000 | #O |
| 7.99855000 | 11.86358000 | 8.75855000  | #O |
| 7.99946000 | 9.35714000  | 8.75860000  | #O |
| 6.52448000 | 7.36324000  | 7.45848000  | #O |
| 6.52046000 | 10.60571000 | 6.75561000  | #O |
| 8.00020000 | 8.66001000  | 5.45822000  | #O |
| 8.00075000 | 12.55255000 | 5.45809000  | #O |
| 6.52114000 | 10.60973000 | 4.18010000  | #O |
| 6.52265000 | 7.36803000  | 3.47069000  | #O |
| 8.00152000 | 11.83216000 | 2.02434000  | #O |
| 8.00189000 | 9.39188000  | 2.01955000  | #O |
| 6.52297000 | 7.35632000  | 0.88745000  | #O |
| 0.59649000 | 7.36677000  | 16.62607000 | #O |
| 2.08611000 | 11.83234000 | 15.50920000 | #O |
| 2.08594000 | 9.39866000  | 15.50521000 | #O |
| 0.61489000 | 7.37745000  | 14.04351000 | #O |
| 0.60584000 | 10.61754000 | 13.34151000 | #O |
| 2.08339000 | 8.67235000  | 12.05514000 | #O |
| 2.08002000 | 12.55411000 | 12.04499000 | #O |
| 0.60169000 | 10.61006000 | 10.75925000 | #O |
| 0.61169000 | 7.37034000  | 10.06361000 | #O |
| 2.08173000 | 11.86484000 | 8.75787000  | #O |
| 2.08258000 | 9.35836000  | 8.76000000  | #O |
| 0.60656000 | 7.36033000  | 7.45709000  | #O |
| 0.60315000 | 10.60593000 | 6.75484000  | #O |
| 2.08291000 | 8.65989000  | 5.45678000  | #O |
| 2.08230000 | 12.55205000 | 5.45524000  | #O |
| 0.60248000 | 10.60641000 | 4.17880000  | #O |
| 0.60452000 | 7.36367000  | 3.47158000  | #O |
| 2.08497000 | 11.83211000 | 2.02709000  | #O |
| 2.08443000 | 9.39205000  | 2.02326000  | #O |
| 0.60584000 | 7.35755000  | 0.88854000  | #O |
| 3.57007000 | 7.35472000  | 16.60850000 | #O |
| 5.04214000 | 11.83009000 | 15.51414000 | #O |
| 5.04210000 | 9.40241000  | 15.49737000 | #O |
| 3.55610000 | 7.38478000  | 14.03682000 | #O |
| 3.56154000 | 10.62003000 | 13.33813000 | #O |
| 5.04107000 | 8.67405000  | 12.05340000 | #O |
| 5.04660000 | 12.55398000 | 12.04442000 | #O |
| 3.56096000 | 10.61238000 | 10.75982000 | #O |
| 3.57405000 | 7.36785000  | 10.06532000 | #O |
| 5.04193000 | 11.86361000 | 8.75792000  | #O |
| 5.03945000 | 9.35765000  | 8.75769000  | #O |
| 3.56564000 | 7.36400000  | 7.45382000  | #O |
| 3.55980000 | 10.60763000 | 6.75498000  | #O |
| 5.04356000 | 8.66012000  | 5.45656000  | #O |
| 5.04120000 | 12.55270000 | 5.45921000  | #O |
| 3.56367000 | 10.60833000 | 4.17973000  | #O |
| 3.56375000 | 7.36625000  | 3.47085000  | #O |
| 5.04400000 | 11.83055000 | 2.02270000  | #O |
| 5.04407000 | 9.39104000  | 2.02225000  | #O |
| 3.56394000 | 7.35908000  | 0.88790000  | #O |
| 8.00042000 | 6.07516000  | 12.05311000 | #O |
| 6.51256000 | 4.07847000  | 18.03353000 | #S |

|            |             |             |     |
|------------|-------------|-------------|-----|
| 6.52144000 | 4.11154000  | 15.27457000 | #Ti |
| 8.00927000 | 0.86436000  | 15.53149000 | #Ti |
| 6.51590000 | 0.87466000  | 12.15734000 | #Ti |
| 7.96655000 | 4.12665000  | 11.95847000 | #Ti |
| 6.46836000 | 4.11302000  | 8.82263000  | #Ti |
| 7.85746000 | 0.87026000  | 8.75884000  | #Ti |
| 6.51649000 | 0.83328000  | 5.34097000  | #Ti |
| 7.99373000 | 4.07329000  | 5.58555000  | #Ti |
| 6.52243000 | 4.11478000  | 2.38924000  | #Ti |
| 8.00309000 | 0.87072000  | 1.97999000  | #Ti |
| 0.59969000 | 4.11637000  | 15.09521000 | #Ti |
| 2.08531000 | 0.86915000  | 15.50614000 | #Ti |
| 0.59721000 | 0.87510000  | 12.16154000 | #Ti |
| 2.10973000 | 4.12055000  | 11.97747000 | #Ti |
| 0.55675000 | 4.11570000  | 8.79838000  | #Ti |
| 1.93878000 | 0.87144000  | 8.75486000  | #Ti |
| 0.59892000 | 0.83303000  | 5.34135000  | #Ti |
| 2.08135000 | 4.07321000  | 5.58334000  | #Ti |
| 0.60546000 | 4.11524000  | 2.38758000  | #Ti |
| 2.08567000 | 0.87131000  | 1.98022000  | #Ti |
| 3.55865000 | 4.13606000  | 15.31919000 | #Ti |
| 5.05504000 | 0.85618000  | 15.49328000 | #Ti |
| 3.55754000 | 0.86729000  | 12.15411000 | #Ti |
| 5.02485000 | 4.12532000  | 12.12519000 | #Ti |
| 3.51941000 | 4.11683000  | 8.81849000  | #Ti |
| 4.89862000 | 0.86717000  | 8.75043000  | #Ti |
| 3.55842000 | 0.83389000  | 5.33987000  | #Ti |
| 5.03829000 | 4.07429000  | 5.59466000  | #Ti |
| 3.56452000 | 4.11558000  | 2.38949000  | #Ti |
| 5.04454000 | 0.87053000  | 1.97788000  | #Ti |
| 6.52789000 | 10.61874000 | 15.15153000 | #Ti |
| 7.99523000 | 7.36166000  | 15.51340000 | #Ti |
| 6.51478000 | 7.37431000  | 12.14156000 | #Ti |
| 7.99618000 | 10.62266000 | 11.95892000 | #Ti |
| 6.46564000 | 10.60909000 | 8.75845000  | #Ti |
| 7.85934000 | 7.35860000  | 8.75339000  | #Ti |
| 6.51671000 | 7.32741000  | 5.33422000  | #Ti |
| 7.99517000 | 10.56985000 | 5.55632000  | #Ti |
| 6.52238000 | 10.61096000 | 2.36468000  | #Ti |
| 8.00260000 | 7.36006000  | 1.97399000  | #Ti |
| 0.60450000 | 10.61141000 | 15.15363000 | #Ti |
| 2.07445000 | 7.37450000  | 15.53066000 | #Ti |
| 0.59723000 | 7.36925000  | 12.16468000 | #Ti |
| 2.07669000 | 10.62105000 | 11.95574000 | #Ti |
| 0.54713000 | 10.61197000 | 8.75714000  | #Ti |
| 1.93720000 | 7.36073000  | 8.75637000  | #Ti |
| 0.59945000 | 7.32656000  | 5.33668000  | #Ti |
| 2.07774000 | 10.57110000 | 5.55482000  | #Ti |
| 0.60469000 | 10.61164000 | 2.36408000  | #Ti |
| 2.08522000 | 7.36013000  | 1.97553000  | #Ti |
| 3.55877000 | 10.62683000 | 15.14932000 | #Ti |
| 5.03294000 | 7.40138000  | 15.47009000 | #Ti |
| 3.55264000 | 7.37139000  | 12.14509000 | #Ti |
| 5.03663000 | 10.61971000 | 11.95592000 | #Ti |
| 3.50517000 | 10.61253000 | 8.75714000  | #Ti |

|            |             |            |     |
|------------|-------------|------------|-----|
| 4.89846000 | 7.36227000  | 8.74398000 | #Ti |
| 3.55777000 | 7.32826000  | 5.33541000 | #Ti |
| 5.03681000 | 10.57080000 | 5.55711000 | #Ti |
| 3.56370000 | 10.61177000 | 2.36470000 | #Ti |
| 5.04361000 | 7.36065000  | 1.97346000 | #Ti |

Rut-Glu-Z

1.000000000

|           |           |           |
|-----------|-----------|-----------|
| 11.834800 | 0.000000  | 0.000000  |
| 0.000000  | 12.992946 | 0.000000  |
| 0.000000  | 0.000000  | 30.000000 |

H C N O Ti

9 5 1 164 80

Cartesian

|            |            |             |    |
|------------|------------|-------------|----|
| 6.73506000 | 5.78486000 | 20.87809000 | #H |
| 5.83518000 | 5.38289000 | 19.40400000 | #H |
| 7.36240000 | 3.27287000 | 21.05688000 | #H |
| 5.65963000 | 3.72236000 | 21.32593000 | #H |
| 6.68208000 | 1.38092000 | 18.26281000 | #H |
| 8.87777000 | 5.01970000 | 19.81886000 | #H |
| 8.93796000 | 6.86861000 | 18.11047000 | #H |
| 7.30477000 | 6.95060000 | 18.08177000 | #H |
| 8.12551000 | 7.33951000 | 19.55864000 | #H |
| 6.69352000 | 5.08637000 | 20.02637000 | #C |
| 6.45694000 | 3.66532000 | 20.57274000 | #C |
| 5.97709000 | 2.71412000 | 19.48225000 | #C |
| 8.05428000 | 4.47244000 | 17.90543000 | #C |
| 7.98535000 | 5.26044000 | 19.22377000 | #C |
| 8.10385000 | 6.69147000 | 18.76639000 | #N |
| 4.86133000 | 2.76916000 | 18.98917000 | #O |
| 6.94715000 | 1.85393000 | 19.11056000 | #O |
| 9.20740000 | 4.23754000 | 17.42735000 | #O |
| 6.93941000 | 4.25540000 | 17.33943000 | #O |
| 3.66580000 | 0.75953000 | 16.63579000 | #O |
| 5.11186000 | 5.27165000 | 15.43460000 | #O |
| 5.12398000 | 2.79863000 | 15.46781000 | #O |
| 3.67626000 | 0.77404000 | 14.05866000 | #O |
| 3.65109000 | 4.02913000 | 13.33882000 | #O |
| 5.14158000 | 2.07516000 | 12.06329000 | #O |
| 5.14582000 | 5.99665000 | 12.08682000 | #O |
| 3.67525000 | 4.03999000 | 10.77332000 | #O |
| 3.67477000 | 0.77294000 | 10.06820000 | #O |
| 5.15893000 | 5.28585000 | 8.77550000  | #O |
| 5.14926000 | 2.77809000 | 8.77873000  | #O |
| 3.68129000 | 0.78086000 | 7.46130000  | #O |
| 3.67246000 | 4.03770000 | 6.77521000  | #O |
| 5.15412000 | 2.08159000 | 5.46861000  | #O |
| 5.15489000 | 5.98284000 | 5.45755000  | #O |
| 3.67173000 | 4.03054000 | 4.20213000  | #O |
| 3.67327000 | 0.76961000 | 3.49068000  | #O |
| 5.15421000 | 5.24440000 | 2.03712000  | #O |
| 5.15261000 | 2.80352000 | 2.05495000  | #O |
| 3.67338000 | 0.77801000 | 0.91048000  | #O |
| 6.62927000 | 0.81018000 | 16.64318000 | #O |



|             |             |             |    |
|-------------|-------------|-------------|----|
| 8.11149000  | 5.29379000  | 15.21631000 | #O |
| 8.10859000  | 2.77436000  | 15.34271000 | #O |
| 6.61460000  | 0.73956000  | 14.04861000 | #O |
| 6.59085000  | 4.01617000  | 13.36319000 | #O |
| 8.10688000  | 2.06992000  | 12.09440000 | #O |
| 8.11064000  | 5.99730000  | 12.11831000 | #O |
| 6.65003000  | 4.03929000  | 10.80406000 | #O |
| 6.63331000  | 0.77438000  | 10.06650000 | #O |
| 8.10488000  | 5.28817000  | 8.77418000  | #O |
| 8.11041000  | 2.77649000  | 8.78111000  | #O |
| 6.63799000  | 0.77971000  | 7.46188000  | #O |
| 6.62822000  | 4.03303000  | 6.78444000  | #O |
| 8.11137000  | 2.08010000  | 5.47212000  | #O |
| 8.10803000  | 5.98391000  | 5.46173000  | #O |
| 6.63289000  | 4.03139000  | 4.20574000  | #O |
| 6.63481000  | 0.76886000  | 3.48842000  | #O |
| 8.10996000  | 5.24491000  | 2.03662000  | #O |
| 8.11113000  | 2.80387000  | 2.05494000  | #O |
| 6.63146000  | 0.77802000  | 0.90918000  | #O |
| 9.56655000  | 0.80510000  | 16.62424000 | #O |
| 11.09527000 | 5.27065000  | 15.46403000 | #O |
| 11.08465000 | 2.80454000  | 15.49347000 | #O |
| 9.59734000  | 0.74298000  | 14.04810000 | #O |
| 9.62433000  | 4.01423000  | 13.37675000 | #O |
| 11.07347000 | 2.07439000  | 12.06663000 | #O |
| 11.07086000 | 5.99655000  | 12.09371000 | #O |
| 9.56388000  | 4.04219000  | 10.80783000 | #O |
| 9.59549000  | 0.77354000  | 10.07172000 | #O |
| 11.05692000 | 5.28620000  | 8.77494000  | #O |
| 11.06067000 | 2.77760000  | 8.77929000  | #O |
| 9.59720000  | 0.77900000  | 7.46287000  | #O |
| 9.58867000  | 4.03412000  | 6.78541000  | #O |
| 11.07053000 | 2.08104000  | 5.47016000  | #O |
| 11.06350000 | 5.98341000  | 5.46389000  | #O |
| 9.58700000  | 4.02892000  | 4.20630000  | #O |
| 9.59244000  | 0.76932000  | 3.48859000  | #O |
| 11.07000000 | 5.24498000  | 2.03923000  | #O |
| 11.06931000 | 2.80363000  | 2.05534000  | #O |
| 9.59084000  | 0.77810000  | 0.90904000  | #O |
| 3.69250000  | 7.27340000  | 16.68773000 | #O |
| 5.14777000  | 11.74555000 | 15.51267000 | #O |
| 5.14613000  | 9.31651000  | 15.54866000 | #O |
| 3.64354000  | 7.31108000  | 14.09466000 | #O |
| 3.67099000  | 10.51438000 | 13.35537000 | #O |
| 5.13710000  | 8.57834000  | 12.05481000 | #O |
| 5.14302000  | 12.46690000 | 12.05918000 | #O |
| 3.66104000  | 10.52464000 | 10.77114000 | #O |
| 3.67271000  | 7.27363000  | 10.03333000 | #O |
| 5.14809000  | 11.77060000 | 8.76257000  | #O |
| 5.15183000  | 9.26352000  | 8.76986000  | #O |
| 3.68469000  | 7.27443000  | 7.44780000  | #O |
| 3.67089000  | 10.51005000 | 6.76418000  | #O |
| 5.15447000  | 8.57535000  | 5.44490000  | #O |
| 5.15222000  | 12.46905000 | 5.47340000  | #O |
| 3.66751000  | 10.52289000 | 4.18912000  | #O |

|             |             |             |    |
|-------------|-------------|-------------|----|
| 3.67455000  | 7.27368000  | 3.46017000  | #O |
| 5.15269000  | 11.73411000 | 2.03284000  | #O |
| 5.15235000  | 9.29396000  | 2.02698000  | #O |
| 3.66892000  | 7.26471000  | 0.87405000  | #O |
| 6.67180000  | 7.23697000  | 16.64428000 | #O |
| 8.10238000  | 11.74276000 | 15.51850000 | #O |
| 8.10501000  | 9.31400000  | 15.51563000 | #O |
| 6.60482000  | 7.36086000  | 14.06594000 | #O |
| 6.62317000  | 10.52262000 | 13.34658000 | #O |
| 8.10777000  | 8.58997000  | 12.05547000 | #O |
| 8.10728000  | 12.47163000 | 12.05979000 | #O |
| 6.62361000  | 10.52692000 | 10.77118000 | #O |
| 6.65450000  | 7.27651000  | 10.08208000 | #O |
| 8.10590000  | 11.77063000 | 8.76618000  | #O |
| 8.10833000  | 9.26209000  | 8.77070000  | #O |
| 6.63251000  | 7.27964000  | 7.46805000  | #O |
| 6.62721000  | 10.51497000 | 6.76414000  | #O |
| 8.10823000  | 8.57370000  | 5.44882000  | #O |
| 8.11106000  | 12.46859000 | 5.47180000  | #O |
| 6.63060000  | 10.52489000 | 4.18724000  | #O |
| 6.63422000  | 7.27204000  | 3.45041000  | #O |
| 8.11083000  | 11.73340000 | 2.02897000  | #O |
| 8.11104000  | 9.29307000  | 2.02684000  | #O |
| 6.62664000  | 7.27078000  | 0.86751000  | #O |
| 9.54038000  | 7.23305000  | 16.64107000 | #O |
| 11.06173000 | 11.74898000 | 15.51198000 | #O |
| 11.06499000 | 9.31997000  | 15.55559000 | #O |
| 9.61940000  | 7.36312000  | 14.07422000 | #O |
| 9.58687000  | 10.52342000 | 13.34947000 | #O |
| 11.08001000 | 8.58236000  | 12.06144000 | #O |
| 11.07377000 | 12.46769000 | 12.06379000 | #O |
| 9.58835000  | 10.52596000 | 10.77295000 | #O |
| 9.58300000  | 7.27571000  | 10.08355000 | #O |
| 11.06571000 | 11.77092000 | 8.76260000  | #O |
| 11.05998000 | 9.26463000  | 8.77081000  | #O |
| 9.57741000  | 7.27760000  | 7.47551000  | #O |
| 9.58535000  | 10.51161000 | 6.76516000  | #O |
| 11.06398000 | 8.57345000  | 5.45215000  | #O |
| 11.07062000 | 12.46883000 | 5.47386000  | #O |
| 9.58753000  | 10.52376000 | 4.18734000  | #O |
| 9.58742000  | 7.27397000  | 3.45203000  | #O |
| 11.07070000 | 11.73421000 | 2.03257000  | #O |
| 11.06979000 | 9.29398000  | 2.02694000  | #O |
| 9.59247000  | 7.26423000  | 0.86632000  | #O |
| 0.70171000  | 0.77265000  | 16.64148000 | #O |
| 2.18490000  | 5.25539000  | 15.51715000 | #O |
| 2.18415000  | 2.80506000  | 15.49688000 | #O |
| 0.70842000  | 0.77579000  | 14.06132000 | #O |
| 0.72233000  | 4.03163000  | 13.33987000 | #O |
| 2.19002000  | 2.07638000  | 12.06760000 | #O |
| 2.18866000  | 5.99028000  | 12.08001000 | #O |
| 0.69957000  | 4.03920000  | 10.77527000 | #O |
| 0.71936000  | 0.77196000  | 10.06835000 | #O |
| 2.18654000  | 5.28292000  | 8.76708000  | #O |
| 2.19225000  | 2.77775000  | 8.77204000  | #O |

|             |             |             |     |
|-------------|-------------|-------------|-----|
| 0.71909000  | 0.78087000  | 7.46340000  | #O  |
| 0.71129000  | 4.03589000  | 6.77709000  | #O  |
| 2.19361000  | 2.08383000  | 5.47256000  | #O  |
| 2.19016000  | 5.98357000  | 5.46083000  | #O  |
| 0.71262000  | 4.03238000  | 4.20378000  | #O  |
| 0.71811000  | 0.76948000  | 3.49127000  | #O  |
| 2.19203000  | 5.24511000  | 2.03834000  | #O  |
| 2.19367000  | 2.80463000  | 2.05230000  | #O  |
| 0.71483000  | 0.77888000  | 0.91082000  | #O  |
| 0.69284000  | 7.28316000  | 16.69198000 | #O  |
| 2.18683000  | 11.74845000 | 15.49824000 | #O  |
| 2.18871000  | 9.31182000  | 15.54710000 | #O  |
| 0.73461000  | 7.30637000  | 14.10084000 | #O  |
| 0.70681000  | 10.51603000 | 13.35830000 | #O  |
| 2.18901000  | 8.58169000  | 12.07034000 | #O  |
| 2.18967000  | 12.47042000 | 12.07932000 | #O  |
| 0.71263000  | 10.52757000 | 10.77234000 | #O  |
| 0.70063000  | 7.27400000  | 10.04525000 | #O  |
| 2.18844000  | 11.77128000 | 8.76161000  | #O  |
| 2.18938000  | 9.26649000  | 8.76284000  | #O  |
| 0.70222000  | 7.27642000  | 7.47154000  | #O  |
| 0.70731000  | 10.51499000 | 6.76569000  | #O  |
| 2.18872000  | 8.57238000  | 5.45481000  | #O  |
| 2.19364000  | 12.46947000 | 5.47810000  | #O  |
| 0.71332000  | 10.52232000 | 4.18937000  | #O  |
| 0.70984000  | 7.27309000  | 3.46157000  | #O  |
| 2.19335000  | 11.73343000 | 2.03025000  | #O  |
| 2.19340000  | 9.29356000  | 2.02970000  | #O  |
| 0.71733000  | 7.27108000  | 0.87585000  | #O  |
| 3.66095000  | 4.03728000  | 15.14847000 | #Ti |
| 5.11838000  | 0.77129000  | 15.54138000 | #Ti |
| 3.64730000  | 0.79533000  | 12.18516000 | #Ti |
| 5.18898000  | 4.02983000  | 12.01482000 | #Ti |
| 3.64092000  | 4.02861000  | 8.80116000  | #Ti |
| 5.00734000  | 0.78177000  | 8.77294000  | #Ti |
| 3.67246000  | 0.80694000  | 5.36376000  | #Ti |
| 5.15732000  | 4.05752000  | 5.59510000  | #Ti |
| 3.67268000  | 4.02347000  | 2.39401000  | #Ti |
| 5.15132000  | 0.77530000  | 1.99845000  | #Ti |
| 6.61133000  | 4.01939000  | 15.33302000 | #Ti |
| 8.11188000  | 0.77026000  | 15.51546000 | #Ti |
| 6.63249000  | 0.80968000  | 12.19220000 | #Ti |
| 8.10805000  | 4.09828000  | 12.17744000 | #Ti |
| 6.60182000  | 4.02270000  | 8.85975000  | #Ti |
| 7.96274000  | 0.77825000  | 8.76893000  | #Ti |
| 6.62690000  | 0.79847000  | 5.35999000  | #Ti |
| 8.10717000  | 4.04768000  | 5.61370000  | #Ti |
| 6.63191000  | 4.02176000  | 2.39743000  | #Ti |
| 8.10952000  | 0.77498000  | 1.99697000  | #Ti |
| 9.57497000  | 4.03557000  | 15.37277000 | #Ti |
| 11.06177000 | 0.78134000  | 15.54256000 | #Ti |
| 9.57207000  | 0.81387000  | 12.17557000 | #Ti |
| 11.01383000 | 4.04166000  | 12.03343000 | #Ti |
| 9.54960000  | 4.02933000  | 8.86412000  | #Ti |
| 10.92394000 | 0.78053000  | 8.76871000  | #Ti |

|             |             |             |     |
|-------------|-------------|-------------|-----|
| 9.58350000  | 0.79795000  | 5.35989000  | #Ti |
| 11.05700000 | 4.05471000  | 5.59997000  | #Ti |
| 9.58922000  | 4.02319000  | 2.39831000  | #Ti |
| 11.06827000 | 0.77539000  | 1.99734000  | #Ti |
| 3.66279000  | 10.52292000 | 15.17431000 | #Ti |
| 5.20426000  | 7.27950000  | 15.59771000 | #Ti |
| 3.67743000  | 7.28897000  | 12.28669000 | #Ti |
| 5.13952000  | 10.57466000 | 11.97417000 | #Ti |
| 3.62199000  | 10.52370000 | 8.77600000  | #Ti |
| 5.03948000  | 7.26920000  | 8.68666000  | #Ti |
| 3.66215000  | 7.29951000  | 5.33072000  | #Ti |
| 5.14542000  | 10.54743000 | 5.56709000  | #Ti |
| 3.67182000  | 10.51726000 | 2.37543000  | #Ti |
| 5.14446000  | 7.26571000  | 1.95939000  | #Ti |
| 6.62427000  | 10.51575000 | 15.16243000 | #Ti |
| 8.11773000  | 7.28246000  | 15.19818000 | #Ti |
| 6.60029000  | 7.31420000  | 11.97201000 | #Ti |
| 8.10154000  | 10.54624000 | 11.97558000 | #Ti |
| 6.58001000  | 10.52017000 | 8.77802000  | #Ti |
| 8.05800000  | 7.27140000  | 8.66438000  | #Ti |
| 6.62657000  | 7.29193000  | 5.29608000  | #Ti |
| 8.10366000  | 10.54539000 | 5.57049000  | #Ti |
| 6.63111000  | 10.51615000 | 2.37387000  | #Ti |
| 8.10814000  | 7.26551000  | 1.94224000  | #Ti |
| 9.58531000  | 10.51991000 | 15.16568000 | #Ti |
| 11.01431000 | 7.28370000  | 15.59980000 | #Ti |
| 9.60758000  | 7.31894000  | 11.94516000 | #Ti |
| 11.06338000 | 10.57363000 | 11.97987000 | #Ti |
| 9.54176000  | 10.52159000 | 8.78043000  | #Ti |
| 11.09032000 | 7.26926000  | 8.65714000  | #Ti |
| 9.58443000  | 7.29073000  | 5.29471000  | #Ti |
| 11.06160000 | 10.54554000 | 5.56961000  | #Ti |
| 9.58961000  | 10.51728000 | 2.37402000  | #Ti |
| 11.07443000 | 7.26618000  | 1.95424000  | #Ti |
| 0.70501000  | 4.03623000  | 15.14841000 | #Ti |
| 2.17415000  | 0.79960000  | 15.55329000 | #Ti |
| 0.71659000  | 0.79907000  | 12.18836000 | #Ti |
| 2.18579000  | 4.07380000  | 11.94738000 | #Ti |
| 0.67440000  | 4.02100000  | 8.81219000  | #Ti |
| 2.04747000  | 0.78208000  | 8.77096000  | #Ti |
| 0.70345000  | 0.80384000  | 5.36109000  | #Ti |
| 2.18778000  | 4.04934000  | 5.58665000  | #Ti |
| 0.71318000  | 4.02225000  | 2.39496000  | #Ti |
| 2.19320000  | 0.77535000  | 1.99918000  | #Ti |
| 0.71056000  | 10.52753000 | 15.17730000 | #Ti |
| 2.18963000  | 7.27230000  | 15.64605000 | #Ti |
| 0.69562000  | 7.29187000  | 12.28951000 | #Ti |
| 2.18373000  | 10.51218000 | 11.98107000 | #Ti |
| 0.66550000  | 10.52272000 | 8.77965000  | #Ti |
| 2.14269000  | 7.26891000  | 8.89226000  | #Ti |
| 0.71484000  | 7.29678000  | 5.32143000  | #Ti |
| 2.18550000  | 10.56288000 | 5.57236000  | #Ti |
| 0.71369000  | 10.51629000 | 2.37555000  | #Ti |
| 2.19567000  | 7.26608000  | 1.97070000  | #Ti |

Rut-Glu-D

1.000000000

11.834800 0.000000 0.000000

0.000000 12.992946 0.000000

0.000000 0.000000 30.000000

H C N O Ti

9 5 1 164 80

Cartesian

|            |            |             |    |
|------------|------------|-------------|----|
| 6.83490000 | 5.70758000 | 20.94840000 | #H |
| 5.94160000 | 5.46706000 | 19.44088000 | #H |
| 7.16368000 | 3.17097000 | 21.10589000 | #H |
| 5.49010000 | 3.76302000 | 21.24537000 | #H |
| 6.59142000 | 1.38538000 | 18.23632000 | #H |
| 8.90146000 | 4.71336000 | 19.88388000 | #H |
| 9.33646000 | 6.93706000 | 17.59559000 | #H |
| 7.60949000 | 7.06471000 | 18.67890000 | #H |
| 8.79508000 | 7.02487000 | 19.83905000 | #H |
| 6.74710000 | 5.05205000 | 20.06742000 | #C |
| 6.33904000 | 3.64791000 | 20.55749000 | #C |
| 5.87794000 | 2.75024000 | 19.42111000 | #C |
| 8.08973000 | 4.46995000 | 17.93294000 | #C |
| 8.07696000 | 5.15408000 | 19.30445000 | #C |
| 8.44617000 | 6.56287000 | 18.99872000 | #N |
| 4.80346000 | 2.86923000 | 18.85122000 | #O |
| 6.82655000 | 1.84500000 | 19.09699000 | #O |
| 9.22882000 | 4.22702000 | 17.40797000 | #O |
| 6.97241000 | 4.29558000 | 17.34883000 | #O |
| 3.67472000 | 0.75887000 | 16.61616000 | #O |
| 5.11407000 | 5.27745000 | 15.44128000 | #O |
| 5.13978000 | 2.80217000 | 15.46234000 | #O |
| 3.67919000 | 0.77878000 | 14.04180000 | #O |
| 3.65522000 | 4.03291000 | 13.33813000 | #O |
| 5.14962000 | 2.07655000 | 12.06022000 | #O |
| 5.15101000 | 5.99921000 | 12.07567000 | #O |
| 3.68385000 | 4.03909000 | 10.77379000 | #O |
| 3.67990000 | 0.77485000 | 10.06287000 | #O |
| 5.15845000 | 5.28895000 | 8.77215000  | #O |
| 5.15245000 | 2.77996000 | 8.77744000  | #O |
| 3.68225000 | 0.78076000 | 7.45466000  | #O |
| 3.67036000 | 4.03747000 | 6.77387000  | #O |
| 5.15122000 | 2.08414000 | 5.46386000  | #O |
| 5.14994000 | 5.98582000 | 5.45611000  | #O |
| 3.67137000 | 4.03216000 | 4.19948000  | #O |
| 3.67347000 | 0.77367000 | 3.47922000  | #O |
| 5.15073000 | 5.25067000 | 2.04060000  | #O |
| 5.15132000 | 2.80926000 | 2.05079000  | #O |
| 3.66962000 | 0.78763000 | 0.89762000  | #O |
| 6.63272000 | 0.80235000 | 16.61931000 | #O |
| 8.13086000 | 5.30529000 | 15.20634000 | #O |
| 8.10898000 | 2.78208000 | 15.34815000 | #O |
| 6.62383000 | 0.73638000 | 14.03369000 | #O |
| 6.59712000 | 4.02588000 | 13.37090000 | #O |
| 8.11218000 | 2.07457000 | 12.08888000 | #O |
| 8.11507000 | 6.00187000 | 12.10800000 | #O |

|             |             |             |    |
|-------------|-------------|-------------|----|
| 6.65430000  | 4.04285000  | 10.80635000 | #O |
| 6.63863000  | 0.77671000  | 10.06418000 | #O |
| 8.10526000  | 5.29051000  | 8.77556000  | #O |
| 8.10959000  | 2.77855000  | 8.77807000  | #O |
| 6.63619000  | 0.78174000  | 7.45956000  | #O |
| 6.62748000  | 4.03431000  | 6.78327000  | #O |
| 8.10884000  | 2.08141000  | 5.46640000  | #O |
| 8.10847000  | 5.98534000  | 5.46217000  | #O |
| 6.63157000  | 4.03528000  | 4.20576000  | #O |
| 6.63050000  | 0.77473000  | 3.47837000  | #O |
| 8.10754000  | 5.25110000  | 2.04221000  | #O |
| 8.10804000  | 2.81010000  | 2.05191000  | #O |
| 6.62892000  | 0.78566000  | 0.89794000  | #O |
| 9.57465000  | 0.80621000  | 16.61172000 | #O |
| 11.10883000 | 5.27803000  | 15.45902000 | #O |
| 11.09338000 | 2.80760000  | 15.48399000 | #O |
| 9.60121000  | 0.74308000  | 14.03852000 | #O |
| 9.63011000  | 4.01576000  | 13.37354000 | #O |
| 11.07840000 | 2.07259000  | 12.06059000 | #O |
| 11.07689000 | 5.99687000  | 12.08368000 | #O |
| 9.56582000  | 4.04205000  | 10.80551000 | #O |
| 9.59888000  | 0.77681000  | 10.06576000 | #O |
| 11.06372000 | 5.28697000  | 8.77347000  | #O |
| 11.06234000 | 2.77920000  | 8.77691000  | #O |
| 9.59823000  | 0.78010000  | 7.45643000  | #O |
| 9.58705000  | 4.03630000  | 6.78542000  | #O |
| 11.06904000 | 2.08522000  | 5.46685000  | #O |
| 11.06349000 | 5.98665000  | 5.46528000  | #O |
| 9.58782000  | 4.03344000  | 4.20652000  | #O |
| 9.59225000  | 0.77470000  | 3.47943000  | #O |
| 11.06649000 | 5.25026000  | 2.04281000  | #O |
| 11.06679000 | 2.80939000  | 2.05183000  | #O |
| 9.58685000  | 0.78793000  | 0.89730000  | #O |
| 3.69190000  | 7.28757000  | 16.66239000 | #O |
| 5.15326000  | 11.74431000 | 15.49510000 | #O |
| 5.15778000  | 9.31335000  | 15.53437000 | #O |
| 3.65125000  | 7.30920000  | 14.07739000 | #O |
| 3.67667000  | 10.51348000 | 13.34431000 | #O |
| 5.14823000  | 8.58239000  | 12.04969000 | #O |
| 5.14715000  | 12.46876000 | 12.05015000 | #O |
| 3.66842000  | 10.52483000 | 10.76405000 | #O |
| 3.68330000  | 7.27833000  | 10.05592000 | #O |
| 5.15271000  | 11.77201000 | 8.75854000  | #O |
| 5.15216000  | 9.26358000  | 8.76039000  | #O |
| 3.66085000  | 7.27603000  | 7.45668000  | #O |
| 3.66952000  | 10.51901000 | 6.75729000  | #O |
| 5.14887000  | 8.57843000  | 5.44709000  | #O |
| 5.15174000  | 12.47156000 | 5.46282000  | #O |
| 3.66935000  | 10.52755000 | 4.18108000  | #O |
| 3.67059000  | 7.28112000  | 3.45927000  | #O |
| 5.14967000  | 11.74191000 | 2.02349000  | #O |
| 5.14749000  | 9.30136000  | 2.02098000  | #O |
| 3.66510000  | 7.26782000  | 0.87812000  | #O |
| 6.69341000  | 7.24031000  | 16.59444000 | #O |
| 8.11371000  | 11.73971000 | 15.50853000 | #O |

|             |             |             |    |
|-------------|-------------|-------------|----|
| 8.11507000  | 9.30793000  | 15.48815000 | #O |
| 6.60114000  | 7.35341000  | 14.05008000 | #O |
| 6.63143000  | 10.52872000 | 13.33737000 | #O |
| 8.11113000  | 8.58732000  | 12.04552000 | #O |
| 8.11359000  | 12.47103000 | 12.04617000 | #O |
| 6.62874000  | 10.52555000 | 10.76286000 | #O |
| 6.64212000  | 7.27887000  | 10.06628000 | #O |
| 8.10619000  | 11.77591000 | 8.76118000  | #O |
| 8.11090000  | 9.26745000  | 8.76505000  | #O |
| 6.63484000  | 7.28385000  | 7.44882000  | #O |
| 6.62891000  | 10.52122000 | 6.75613000  | #O |
| 8.10992000  | 8.57980000  | 5.45133000  | #O |
| 8.10895000  | 12.47315000 | 5.45974000  | #O |
| 6.62802000  | 10.52542000 | 4.17948000  | #O |
| 6.63192000  | 7.28206000  | 3.45395000  | #O |
| 8.10695000  | 11.74255000 | 2.02432000  | #O |
| 8.10834000  | 9.30188000  | 2.01982000  | #O |
| 6.62635000  | 7.27474000  | 0.86936000  | #O |
| 9.57120000  | 7.23752000  | 16.64388000 | #O |
| 11.06921000 | 11.74453000 | 15.50255000 | #O |
| 11.07672000 | 9.30999000  | 15.52300000 | #O |
| 9.61978000  | 7.36830000  | 14.04932000 | #O |
| 9.59186000  | 10.52078000 | 13.33774000 | #O |
| 11.08623000 | 8.58781000  | 12.05353000 | #O |
| 11.07734000 | 12.47014000 | 12.05514000 | #O |
| 9.59293000  | 10.52836000 | 10.76244000 | #O |
| 9.60603000  | 7.28098000  | 10.08211000 | #O |
| 11.06954000 | 11.77436000 | 8.75640000  | #O |
| 11.06534000 | 9.26861000  | 8.76175000  | #O |
| 9.58327000  | 7.27867000  | 7.48195000  | #O |
| 9.58399000  | 10.52157000 | 6.75721000  | #O |
| 11.06232000 | 8.57773000  | 5.45600000  | #O |
| 11.06928000 | 12.47215000 | 5.46447000  | #O |
| 9.58836000  | 10.52612000 | 4.18031000  | #O |
| 9.58418000  | 7.28058000  | 3.45960000  | #O |
| 11.06684000 | 11.74199000 | 2.02375000  | #O |
| 11.06545000 | 9.30168000  | 2.02297000  | #O |
| 9.59060000  | 7.26919000  | 0.87720000  | #O |
| 0.70948000  | 0.76723000  | 16.62558000 | #O |
| 2.19328000  | 5.26181000  | 15.50001000 | #O |
| 2.19201000  | 2.80789000  | 15.49277000 | #O |
| 0.71903000  | 0.77453000  | 14.04747000 | #O |
| 0.72987000  | 4.02909000  | 13.33308000 | #O |
| 2.19429000  | 2.08002000  | 12.05403000 | #O |
| 2.19464000  | 5.99466000  | 12.07268000 | #O |
| 0.70245000  | 4.04026000  | 10.77281000 | #O |
| 0.72420000  | 0.77412000  | 10.06450000 | #O |
| 2.18910000  | 5.28298000  | 8.77098000  | #O |
| 2.19499000  | 2.77675000  | 8.77031000  | #O |
| 0.71729000  | 0.78374000  | 7.45935000  | #O |
| 0.71410000  | 4.03658000  | 6.77493000  | #O |
| 2.19216000  | 2.08325000  | 5.46419000  | #O |
| 2.19131000  | 5.98290000  | 5.45663000  | #O |
| 0.70948000  | 4.03509000  | 4.20264000  | #O |
| 0.71271000  | 0.77426000  | 3.47970000  | #O |

|             |             |             |     |
|-------------|-------------|-------------|-----|
| 2.18959000  | 5.25057000  | 2.04171000  | #O  |
| 2.19015000  | 2.80996000  | 2.04838000  | #O  |
| 0.71126000  | 0.78582000  | 0.89853000  | #O  |
| 0.70991000  | 7.28597000  | 16.65522000 | #O  |
| 2.19950000  | 11.74663000 | 15.48822000 | #O  |
| 2.19257000  | 9.30804000  | 15.51953000 | #O  |
| 0.70585000  | 7.30076000  | 14.07616000 | #O  |
| 0.71443000  | 10.52703000 | 13.34449000 | #O  |
| 2.19255000  | 8.58143000  | 12.06712000 | #O  |
| 2.19760000  | 12.47018000 | 12.06443000 | #O  |
| 0.71813000  | 10.52853000 | 10.76306000 | #O  |
| 0.71063000  | 7.27948000  | 10.06351000 | #O  |
| 2.19140000  | 11.77672000 | 8.75642000  | #O  |
| 2.19300000  | 9.27113000  | 8.76299000  | #O  |
| 0.72124000  | 7.27910000  | 7.46091000  | #O  |
| 0.71029000  | 10.52172000 | 6.75718000  | #O  |
| 2.19160000  | 8.58016000  | 5.45209000  | #O  |
| 2.19083000  | 12.47314000 | 5.46331000  | #O  |
| 0.70986000  | 10.52493000 | 4.18212000  | #O  |
| 0.71016000  | 7.28106000  | 3.46738000  | #O  |
| 2.18951000  | 11.74275000 | 2.02453000  | #O  |
| 2.19041000  | 9.30251000  | 2.02258000  | #O  |
| 0.71178000  | 7.27471000  | 0.87989000  | #O  |
| 3.67068000  | 4.03894000  | 15.14594000 | #Ti |
| 5.12393000  | 0.77201000  | 15.51797000 | #Ti |
| 3.66368000  | 0.80246000  | 12.16127000 | #Ti |
| 5.19999000  | 4.04509000  | 12.02130000 | #Ti |
| 3.63797000  | 4.01732000  | 8.79936000  | #Ti |
| 5.01155000  | 0.78365000  | 8.75481000  | #Ti |
| 3.66395000  | 0.79857000  | 5.34892000  | #Ti |
| 5.15607000  | 4.03982000  | 5.59600000  | #Ti |
| 3.67048000  | 4.02831000  | 2.39132000  | #Ti |
| 5.14707000  | 0.78271000  | 1.98571000  | #Ti |
| 6.62430000  | 4.01708000  | 15.36991000 | #Ti |
| 8.12031000  | 0.77521000  | 15.50179000 | #Ti |
| 6.63005000  | 0.80457000  | 12.17667000 | #Ti |
| 8.11163000  | 4.05686000  | 12.19331000 | #Ti |
| 6.59859000  | 4.04140000  | 8.86215000  | #Ti |
| 7.96379000  | 0.78283000  | 8.76511000  | #Ti |
| 6.62807000  | 0.79373000  | 5.34637000  | #Ti |
| 8.10538000  | 4.05064000  | 5.61229000  | #Ti |
| 6.62935000  | 4.02948000  | 2.39734000  | #Ti |
| 8.10570000  | 0.78355000  | 1.98483000  | #Ti |
| 9.58546000  | 4.05707000  | 15.40292000 | #Ti |
| 11.06768000 | 0.78352000  | 15.53124000 | #Ti |
| 9.58893000  | 0.79977000  | 12.16080000 | #Ti |
| 11.01074000 | 4.04899000  | 12.02850000 | #Ti |
| 9.54461000  | 4.01988000  | 8.86370000  | #Ti |
| 10.92743000 | 0.78426000  | 8.75354000  | #Ti |
| 9.57603000  | 0.79491000  | 5.34797000  | #Ti |
| 11.05543000 | 4.03742000  | 5.60112000  | #Ti |
| 9.58680000  | 4.02911000  | 2.39831000  | #Ti |
| 11.06414000 | 0.78319000  | 1.98549000  | #Ti |
| 3.67168000  | 10.51310000 | 15.16095000 | #Ti |
| 5.18575000  | 7.28007000  | 15.55133000 | #Ti |



|             |             |             |     |
|-------------|-------------|-------------|-----|
| 3.68201000  | 7.29526000  | 12.21181000 | #Ti |
| 5.14596000  | 10.56174000 | 11.96467000 | #Ti |
| 3.61775000  | 10.54006000 | 8.76598000  | #Ti |
| 4.98947000  | 7.27029000  | 8.74957000  | #Ti |
| 3.66583000  | 7.29238000  | 5.31687000  | #Ti |
| 5.14379000  | 10.54759000 | 5.56053000  | #Ti |
| 3.66846000  | 10.52519000 | 2.36661000  | #Ti |
| 5.14462000  | 7.27238000  | 1.95579000  | #Ti |
| 6.63405000  | 10.53528000 | 15.15087000 | #Ti |
| 8.01639000  | 7.28116000  | 15.25974000 | #Ti |
| 6.62599000  | 7.30429000  | 11.92751000 | #Ti |
| 8.10702000  | 10.55578000 | 11.95941000 | #Ti |
| 6.57555000  | 10.50427000 | 8.76424000  | #Ti |
| 8.04513000  | 7.27628000  | 8.61471000  | #Ti |
| 6.61814000  | 7.28698000  | 5.30695000  | #Ti |
| 8.10220000  | 10.53041000 | 5.55784000  | #Ti |
| 6.62753000  | 10.52252000 | 2.36527000  | #Ti |
| 8.10593000  | 7.27232000  | 1.95154000  | #Ti |
| 9.59366000  | 10.50738000 | 15.15216000 | #Ti |
| 11.14204000 | 7.28624000  | 15.52273000 | #Ti |
| 9.59196000  | 7.30576000  | 12.15382000 | #Ti |
| 11.06832000 | 10.54297000 | 11.96317000 | #Ti |
| 9.53686000  | 10.54455000 | 8.76404000  | #Ti |
| 10.97549000 | 7.27303000  | 8.83668000  | #Ti |
| 9.58909000  | 7.28636000  | 5.30488000  | #Ti |
| 11.06086000 | 10.55209000 | 5.56140000  | #Ti |
| 9.58637000  | 10.52511000 | 2.36584000  | #Ti |
| 11.07239000 | 7.27254000  | 1.96645000  | #Ti |
| 0.71525000  | 4.02225000  | 15.13691000 | #Ti |
| 2.18315000  | 0.79823000  | 15.53624000 | #Ti |
| 0.70692000  | 0.79443000  | 12.17350000 | #Ti |
| 2.19021000  | 4.04630000  | 11.93508000 | #Ti |
| 0.67020000  | 4.03617000  | 8.80615000  | #Ti |
| 2.04828000  | 0.78429000  | 8.76439000  | #Ti |
| 0.70946000  | 0.79956000  | 5.34708000  | #Ti |
| 2.18728000  | 4.05441000  | 5.58031000  | #Ti |
| 0.71006000  | 4.02902000  | 2.39398000  | #Ti |
| 2.18888000  | 0.78331000  | 1.98521000  | #Ti |
| 0.72001000  | 10.54502000 | 15.16012000 | #Ti |
| 2.23975000  | 7.27066000  | 15.57343000 | #Ti |
| 0.72241000  | 7.28840000  | 12.18634000 | #Ti |
| 2.18965000  | 10.54333000 | 11.96718000 | #Ti |
| 0.66152000  | 10.50890000 | 8.76410000  | #Ti |
| 2.06951000  | 7.26981000  | 8.73440000  | #Ti |
| 0.70037000  | 7.29325000  | 5.34217000  | #Ti |
| 2.18534000  | 10.54179000 | 5.56009000  | #Ti |
| 0.71006000  | 10.52282000 | 2.36740000  | #Ti |
| 2.18662000  | 7.27165000  | 1.97344000  | #Ti |

Rut-Glu-C

|             |           |           |
|-------------|-----------|-----------|
| 1.000000000 |           |           |
| 11.834800   | 0.000000  | 0.000000  |
| 0.000000    | 12.992946 | 0.000000  |
| 0.000000    | 0.000000  | 30.000000 |

H C N O Ti  
9 5 1 164 80

Cartesian

|             |            |             |    |
|-------------|------------|-------------|----|
| 1.17326000  | 5.76053000 | 18.92217000 | #H |
| 1.33022000  | 5.56277000 | 17.20928000 | #H |
| 0.29594000  | 3.11700000 | 17.55164000 | #H |
| 0.03806000  | 3.61543000 | 19.21723000 | #H |
| 3.06611000  | 2.76528000 | 17.26018000 | #H |
| 4.41363000  | 3.59001000 | 17.54011000 | #H |
| 3.38515000  | 5.45672000 | 18.42073000 | #H |
| 3.88275000  | 2.53199000 | 20.69363000 | #H |
| 9.97359000  | 6.47669000 | 17.50794000 | #H |
| 1.35255000  | 5.00519000 | 18.14762000 | #C |
| 0.17302000  | 4.00453000 | 18.19323000 | #C |
| 10.71570000 | 4.69524000 | 17.78074000 | #C |
| 2.79799000  | 4.52290000 | 18.36643000 | #C |
| 2.94019000  | 3.87981000 | 19.75318000 | #C |
| 3.43305000  | 3.72669000 | 17.27630000 | #N |
| 10.59662000 | 5.93614000 | 18.15710000 | #O |
| 9.83355000  | 4.12619000 | 17.07926000 | #O |
| 2.32639000  | 4.24655000 | 20.73782000 | #O |
| 3.84986000  | 2.86564000 | 19.77183000 | #O |
| 9.54680000  | 0.87702000 | 16.25454000 | #O |
| 11.06161000 | 5.34870000 | 15.03404000 | #O |
| 11.06125000 | 2.85187000 | 14.98761000 | #O |
| 9.52769000  | 0.82032000 | 13.68324000 | #O |
| 9.53112000  | 4.10020000 | 13.02226000 | #O |
| 11.01534000 | 2.13991000 | 11.71106000 | #O |
| 11.00765000 | 6.05696000 | 11.70421000 | #O |
| 9.51994000  | 4.10118000 | 10.42374000 | #O |
| 9.53526000  | 0.84890000 | 9.70561000  | #O |
| 11.00629000 | 5.35625000 | 8.41280000  | #O |
| 11.00287000 | 2.84813000 | 8.40659000  | #O |
| 9.53566000  | 0.84934000 | 7.09698000  | #O |
| 9.52835000  | 4.10703000 | 6.41267000  | #O |
| 11.00766000 | 2.14764000 | 5.11054000  | #O |
| 11.00737000 | 6.04818000 | 5.09339000  | #O |
| 9.52728000  | 4.09417000 | 3.83669000  | #O |
| 9.52926000  | 0.85430000 | 3.11630000  | #O |
| 11.00886000 | 5.32864000 | 1.67926000  | #O |
| 11.01021000 | 2.88861000 | 1.67618000  | #O |
| 9.52903000  | 0.86357000 | 0.53551000  | #O |
| 0.66262000  | 0.89072000 | 16.24696000 | #O |
| 2.12600000  | 5.34332000 | 15.06889000 | #O |
| 2.10123000  | 2.85751000 | 15.01487000 | #O |
| 0.66577000  | 0.78070000 | 13.66167000 | #O |
| 0.66494000  | 4.12382000 | 12.92391000 | #O |
| 2.13774000  | 2.13804000 | 11.70470000 | #O |
| 2.13974000  | 6.05725000 | 11.70135000 | #O |
| 0.64879000  | 4.09612000 | 10.41347000 | #O |
| 0.66435000  | 0.84962000 | 9.70466000  | #O |
| 2.13148000  | 5.35512000 | 8.41436000  | #O |
| 2.13523000  | 2.84643000 | 8.40471000  | #O |
| 0.65781000  | 0.85057000 | 7.09696000  | #O |
| 0.65201000  | 4.10275000 | 6.40959000  | #O |

|             |             |             |    |
|-------------|-------------|-------------|----|
| 2.13334000  | 2.14765000  | 5.10806000  | #O |
| 2.13224000  | 6.04806000  | 5.09415000  | #O |
| 0.65084000  | 4.09906000  | 3.83449000  | #O |
| 0.65331000  | 0.85612000  | 3.11709000  | #O |
| 2.13219000  | 5.32898000  | 1.68002000  | #O |
| 2.13099000  | 2.88859000  | 1.67641000  | #O |
| 0.65275000  | 0.85722000  | 0.53499000  | #O |
| 3.59606000  | 0.90577000  | 16.25317000 | #O |
| 5.10931000  | 5.32445000  | 15.17717000 | #O |
| 5.11796000  | 2.86926000  | 15.11191000 | #O |
| 3.62314000  | 0.81057000  | 13.67624000 | #O |
| 3.61729000  | 4.10332000  | 13.00927000 | #O |
| 5.09607000  | 2.14046000  | 11.71153000 | #O |
| 5.09882000  | 6.05448000  | 11.71631000 | #O |
| 3.62443000  | 4.09919000  | 10.41447000 | #O |
| 3.62587000  | 0.84656000  | 9.70746000  | #O |
| 5.08882000  | 5.35334000  | 8.41071000  | #O |
| 5.08755000  | 2.84789000  | 8.40635000  | #O |
| 3.61556000  | 0.84908000  | 7.09941000  | #O |
| 3.60742000  | 4.10608000  | 6.41041000  | #O |
| 5.08838000  | 2.14731000  | 5.11283000  | #O |
| 5.08628000  | 6.04920000  | 5.10069000  | #O |
| 3.61133000  | 4.09473000  | 3.83552000  | #O |
| 3.61138000  | 0.85363000  | 3.11594000  | #O |
| 5.09266000  | 5.32881000  | 1.68487000  | #O |
| 5.09275000  | 2.88881000  | 1.67657000  | #O |
| 3.61350000  | 0.86290000  | 0.53527000  | #O |
| 9.56342000  | 7.28264000  | 16.28078000 | #O |
| 11.01505000 | 11.81490000 | 15.14875000 | #O |
| 11.00919000 | 9.38379000  | 15.13811000 | #O |
| 9.51944000  | 7.39306000  | 13.68290000 | #O |
| 9.53211000  | 10.59827000 | 12.98008000 | #O |
| 11.00807000 | 8.65312000  | 11.68699000 | #O |
| 11.00486000 | 12.53456000 | 11.68333000 | #O |
| 9.52451000  | 10.59101000 | 10.40112000 | #O |
| 9.53810000  | 7.34833000  | 9.70551000  | #O |
| 11.00818000 | 11.84709000 | 8.40383000  | #O |
| 11.00754000 | 9.33972000  | 8.39544000  | #O |
| 9.53148000  | 7.34738000  | 7.09775000  | #O |
| 9.52758000  | 10.59627000 | 6.39589000  | #O |
| 11.00902000 | 8.64532000  | 5.09971000  | #O |
| 11.00800000 | 12.53863000 | 5.09570000  | #O |
| 9.52667000  | 10.59050000 | 3.82069000  | #O |
| 9.53124000  | 7.35767000  | 3.10835000  | #O |
| 11.00929000 | 11.82337000 | 1.67136000  | #O |
| 11.00988000 | 9.38313000  | 1.65913000  | #O |
| 9.52521000  | 7.35330000  | 0.52608000  | #O |
| 0.66456000  | 7.37718000  | 16.21574000 | #O |
| 2.13761000  | 11.81563000 | 15.15592000 | #O |
| 2.14662000  | 9.39134000  | 15.13821000 | #O |
| 0.65274000  | 7.39047000  | 13.66284000 | #O |
| 0.65571000  | 10.59911000 | 12.97921000 | #O |
| 2.14342000  | 8.65048000  | 11.69790000 | #O |
| 2.14209000  | 12.53031000 | 11.67970000 | #O |
| 0.65491000  | 10.58829000 | 10.40089000 | #O |

|            |             |             |    |
|------------|-------------|-------------|----|
| 0.66886000 | 7.35505000  | 9.71343000  | #O |
| 2.13113000 | 11.84728000 | 8.40033000  | #O |
| 2.13148000 | 9.33986000  | 8.39603000  | #O |
| 0.65542000 | 7.34461000  | 7.09657000  | #O |
| 0.64967000 | 10.59572000 | 6.39600000  | #O |
| 2.13106000 | 8.64579000  | 5.10331000  | #O |
| 2.13240000 | 12.53913000 | 5.09587000  | #O |
| 0.65170000 | 10.59473000 | 3.82075000  | #O |
| 0.65324000 | 7.35670000  | 3.10449000  | #O |
| 2.13323000 | 11.82274000 | 1.66883000  | #O |
| 2.13309000 | 9.38274000  | 1.66135000  | #O |
| 0.65295000 | 7.34949000  | 0.52186000  | #O |
| 3.60548000 | 7.32642000  | 16.26328000 | #O |
| 5.09903000 | 11.82051000 | 15.15096000 | #O |
| 5.09392000 | 9.38320000  | 15.15704000 | #O |
| 3.62978000 | 7.37035000  | 13.68954000 | #O |
| 3.61581000 | 10.60363000 | 12.98166000 | #O |
| 5.09680000 | 8.65236000  | 11.70459000 | #O |
| 5.10284000 | 12.53523000 | 11.69931000 | #O |
| 3.61712000 | 10.58652000 | 10.40191000 | #O |
| 3.62946000 | 7.34967000  | 9.71824000  | #O |
| 5.09058000 | 11.84721000 | 8.40042000  | #O |
| 5.08808000 | 9.34107000  | 8.39082000  | #O |
| 3.60193000 | 7.34474000  | 7.11937000  | #O |
| 3.60765000 | 10.59776000 | 6.39648000  | #O |
| 5.08646000 | 8.64487000  | 5.10992000  | #O |
| 5.08956000 | 12.53844000 | 5.09857000  | #O |
| 3.61021000 | 10.58959000 | 3.82159000  | #O |
| 3.60975000 | 7.35739000  | 3.11046000  | #O |
| 5.09193000 | 11.82358000 | 1.67232000  | #O |
| 5.09273000 | 9.38400000  | 1.66038000  | #O |
| 3.61601000 | 7.35208000  | 0.52683000  | #O |
| 6.56810000 | 0.85514000  | 16.26999000 | #O |
| 8.03905000 | 5.34044000  | 15.07980000 | #O |
| 8.04265000 | 2.87922000  | 15.13441000 | #O |
| 6.58010000 | 0.84086000  | 13.69291000 | #O |
| 6.56709000 | 4.10087000  | 12.98993000 | #O |
| 8.05376000 | 2.14394000  | 11.71326000 | #O |
| 8.04890000 | 6.05704000  | 11.71932000 | #O |
| 6.57333000 | 4.10007000  | 10.43631000 | #O |
| 6.57975000 | 0.85216000  | 9.70839000  | #O |
| 8.04879000 | 5.35379000  | 8.41322000  | #O |
| 8.05097000 | 2.84776000  | 8.40615000  | #O |
| 6.57498000 | 0.85069000  | 7.10057000  | #O |
| 6.56880000 | 4.10153000  | 6.41560000  | #O |
| 8.05163000 | 2.14716000  | 5.11221000  | #O |
| 8.05056000 | 6.04740000  | 5.09496000  | #O |
| 6.56829000 | 4.09822000  | 3.83939000  | #O |
| 6.57030000 | 0.85786000  | 3.12160000  | #O |
| 8.04889000 | 5.32947000  | 1.68500000  | #O |
| 8.04822000 | 2.88924000  | 1.67725000  | #O |
| 6.57121000 | 0.85710000  | 0.53742000  | #O |
| 6.59447000 | 7.35432000  | 16.28495000 | #O |
| 8.05474000 | 11.81576000 | 15.15244000 | #O |
| 8.06115000 | 9.37953000  | 15.15349000 | #O |

|             |             |             |     |
|-------------|-------------|-------------|-----|
| 6.56156000  | 7.36165000  | 13.70505000 | #O  |
| 6.57418000  | 10.59590000 | 12.98848000 | #O  |
| 8.04719000  | 8.65183000  | 11.69922000 | #O  |
| 8.04902000  | 12.53594000 | 11.70025000 | #O  |
| 6.57065000  | 10.59273000 | 10.40090000 | #O  |
| 6.56861000  | 7.35342000  | 9.69846000  | #O  |
| 8.04784000  | 11.84871000 | 8.39813000  | #O  |
| 8.05010000  | 9.34286000  | 8.39512000  | #O  |
| 6.57990000  | 7.34570000  | 7.09430000  | #O  |
| 6.56801000  | 10.59590000 | 6.39594000  | #O  |
| 8.05075000  | 8.64670000  | 5.10248000  | #O  |
| 8.04998000  | 12.53915000 | 5.09678000  | #O  |
| 6.56739000  | 10.59356000 | 3.82273000  | #O  |
| 6.56888000  | 7.36121000  | 3.11553000  | #O  |
| 8.05007000  | 11.82379000 | 1.67125000  | #O  |
| 8.04992000  | 9.38406000  | 1.66188000  | #O  |
| 6.57156000  | 7.34982000  | 0.53058000  | #O  |
| 9.53361000  | 4.09670000  | 14.99952000 | #Ti |
| 11.01015000 | 0.84985000  | 15.15117000 | #Ti |
| 9.52223000  | 0.81497000  | 11.81439000 | #Ti |
| 10.96088000 | 4.05323000  | 11.66067000 | #Ti |
| 9.48243000  | 4.09874000  | 8.42201000  | #Ti |
| 10.86042000 | 0.85547000  | 8.39732000  | #Ti |
| 9.52222000  | 0.82093000  | 4.98542000  | #Ti |
| 11.00809000 | 4.05768000  | 5.22402000  | #Ti |
| 9.52826000  | 4.10619000  | 2.02925000  | #Ti |
| 11.00807000 | 0.86257000  | 1.62210000  | #Ti |
| 0.65122000  | 4.09046000  | 14.71448000 | #Ti |
| 2.12385000  | 0.84094000  | 15.12385000 | #Ti |
| 0.64448000  | 0.80132000  | 11.78349000 | #Ti |
| 2.15375000  | 4.03393000  | 11.62298000 | #Ti |
| 0.60647000  | 4.10484000  | 8.47186000  | #Ti |
| 1.98969000  | 0.85440000  | 8.38842000  | #Ti |
| 0.64763000  | 0.81834000  | 4.98180000  | #Ti |
| 2.12099000  | 4.06374000  | 5.21848000  | #Ti |
| 0.65237000  | 4.10773000  | 2.02133000  | #Ti |
| 2.13293000  | 0.86212000  | 1.61965000  | #Ti |
| 3.58425000  | 4.12807000  | 14.97380000 | #Ti |
| 5.09157000  | 0.86685000  | 15.16620000 | #Ti |
| 3.61610000  | 0.80365000  | 11.79706000 | #Ti |
| 5.04739000  | 4.07210000  | 11.68269000 | #Ti |
| 3.56963000  | 4.09549000  | 8.41504000  | #Ti |
| 4.95002000  | 0.85432000  | 8.39641000  | #Ti |
| 3.60367000  | 0.82347000  | 4.98170000  | #Ti |
| 5.09519000  | 4.05744000  | 5.23108000  | #Ti |
| 3.61159000  | 4.10608000  | 2.02813000  | #Ti |
| 5.09227000  | 0.86245000  | 1.62330000  | #Ti |
| 9.53354000  | 10.59678000 | 14.79329000 | #Ti |
| 11.10210000 | 7.36020000  | 15.04219000 | #Ti |
| 9.52214000  | 7.32820000  | 11.81244000 | #Ti |
| 11.00362000 | 10.54767000 | 11.59684000 | #Ti |
| 9.47165000  | 10.60445000 | 8.39902000  | #Ti |
| 10.85388000 | 7.34576000  | 8.39337000  | #Ti |
| 9.52400000  | 7.31182000  | 4.97157000  | #Ti |
| 11.00129000 | 10.55811000 | 5.19764000  | #Ti |

|             |             |             |     |
|-------------|-------------|-------------|-----|
| 9.52883000  | 10.60259000 | 2.00606000  | #Ti |
| 11.00491000 | 7.35308000  | 1.60534000  | #Ti |
| 0.65464000  | 10.60431000 | 14.79057000 | #Ti |
| 2.15594000  | 7.38812000  | 15.10985000 | #Ti |
| 0.65635000  | 7.29498000  | 11.65584000 | #Ti |
| 2.12946000  | 10.55307000 | 11.59914000 | #Ti |
| 0.59586000  | 10.58931000 | 8.39933000  | #Ti |
| 2.03135000  | 7.34367000  | 8.31409000  | #Ti |
| 0.64558000  | 7.31594000  | 4.95721000  | #Ti |
| 2.12531000  | 10.55634000 | 5.19790000  | #Ti |
| 0.65287000  | 10.60366000 | 2.00591000  | #Ti |
| 2.13421000  | 7.35259000  | 1.60305000  | #Ti |
| 3.62366000  | 10.61504000 | 14.79402000 | #Ti |
| 5.10802000  | 7.35729000  | 15.20081000 | #Ti |
| 3.60756000  | 7.31723000  | 11.80946000 | #Ti |
| 5.08914000  | 10.55762000 | 11.60253000 | #Ti |
| 3.55576000  | 10.60283000 | 8.40184000  | #Ti |
| 4.97089000  | 7.34253000  | 8.44945000  | #Ti |
| 3.60921000  | 7.31564000  | 4.96577000  | #Ti |
| 5.08316000  | 10.56247000 | 5.20032000  | #Ti |
| 3.61155000  | 10.60187000 | 2.00649000  | #Ti |
| 5.09683000  | 7.35333000  | 1.61753000  | #Ti |
| 6.57057000  | 4.10231000  | 14.79267000 | #Ti |
| 8.04830000  | 0.84502000  | 15.18301000 | #Ti |
| 6.56482000  | 0.83933000  | 11.81567000 | #Ti |
| 8.07058000  | 4.07101000  | 11.67351000 | #Ti |
| 6.52657000  | 4.10228000  | 8.50238000  | #Ti |
| 7.90447000  | 0.85468000  | 8.40504000  | #Ti |
| 6.56586000  | 0.81879000  | 4.98801000  | #Ti |
| 8.03584000  | 4.06104000  | 5.22996000  | #Ti |
| 6.56975000  | 4.10780000  | 2.02650000  | #Ti |
| 8.05111000  | 0.86280000  | 1.62423000  | #Ti |
| 6.57604000  | 10.59726000 | 14.80149000 | #Ti |
| 8.08424000  | 7.35038000  | 15.19976000 | #Ti |
| 6.56967000  | 7.32509000  | 11.84952000 | #Ti |
| 8.04454000  | 10.57218000 | 11.60075000 | #Ti |
| 6.51343000  | 10.59005000 | 8.39882000  | #Ti |
| 7.90670000  | 7.34575000  | 8.38888000  | #Ti |
| 6.56226000  | 7.31625000  | 4.98938000  | #Ti |
| 8.04280000  | 10.55473000 | 5.19736000  | #Ti |
| 6.56995000  | 10.60401000 | 2.00769000  | #Ti |
| 8.04829000  | 7.35381000  | 1.62126000  | #Ti |

Rut-Glu-Z2

1.000000000

11.834800 0.000000 0.000000

0.000000 12.992946 0.000000

0.000000 0.000000 30.000000

H C N O Ti

9 5 1 164 80

Cartesian

5.87208000 5.88473000 20.32037000 #H

5.60284000 5.87547000 18.57705000 #H

5.81620000 3.12009000 19.07918000 #H

|            |            |             |    |
|------------|------------|-------------|----|
| 5.05102000 | 3.71078000 | 20.57661000 | #H |
| 8.13126000 | 4.85874000 | 20.00191000 | #H |
| 8.93500000 | 6.65149000 | 18.29900000 | #H |
| 7.33953000 | 6.99173000 | 17.95877000 | #H |
| 8.00223000 | 7.24139000 | 19.59527000 | #H |
| 2.09980000 | 4.34421000 | 19.02254000 | #H |
| 6.03623000 | 5.29561000 | 19.40457000 | #C |
| 5.26078000 | 3.95183000 | 19.52849000 | #C |
| 3.95227000 | 4.05301000 | 18.77253000 | #C |
| 7.91108000 | 4.39206000 | 17.88633000 | #C |
| 7.55521000 | 5.22316000 | 19.13828000 | #C |
| 8.00621000 | 6.61320000 | 18.78841000 | #N |
| 2.89645000 | 4.23836000 | 19.58668000 | #O |
| 3.82091000 | 4.01372000 | 17.55215000 | #O |
| 9.11589000 | 4.28729000 | 17.52215000 | #O |
| 6.88821000 | 3.97566000 | 17.25807000 | #O |
| 3.71627000 | 0.79109000 | 16.65407000 | #O |
| 5.19297000 | 5.25505000 | 15.38772000 | #O |
| 5.15594000 | 2.75537000 | 15.36405000 | #O |
| 3.69909000 | 0.72028000 | 14.06949000 | #O |
| 3.68107000 | 4.02922000 | 13.39229000 | #O |
| 5.17754000 | 2.06276000 | 12.09400000 | #O |
| 5.18284000 | 5.98617000 | 12.11173000 | #O |
| 3.70980000 | 4.02938000 | 10.80002000 | #O |
| 3.70797000 | 0.76679000 | 10.08368000 | #O |
| 5.18656000 | 5.28050000 | 8.78469000  | #O |
| 5.17976000 | 2.77236000 | 8.79429000  | #O |
| 3.71599000 | 0.77058000 | 7.47793000  | #O |
| 3.70346000 | 4.03400000 | 6.79329000  | #O |
| 5.18418000 | 2.07790000 | 5.48684000  | #O |
| 5.18737000 | 5.98037000 | 5.47055000  | #O |
| 3.70296000 | 4.02602000 | 4.21814000  | #O |
| 3.70748000 | 0.76890000 | 3.50804000  | #O |
| 5.18372000 | 5.24584000 | 2.04917000  | #O |
| 5.18294000 | 2.80551000 | 2.06692000  | #O |
| 3.70158000 | 0.77536000 | 0.92814000  | #O |
| 6.67150000 | 0.83083000 | 16.63170000 | #O |
| 8.12386000 | 5.27381000 | 15.25294000 | #O |
| 8.19574000 | 2.74443000 | 15.28714000 | #O |
| 6.65433000 | 0.70175000 | 14.05257000 | #O |
| 6.65315000 | 3.99713000 | 13.34395000 | #O |
| 8.15076000 | 2.05706000 | 12.11099000 | #O |
| 8.14425000 | 5.98705000 | 12.11936000 | #O |
| 6.66726000 | 4.03053000 | 10.81192000 | #O |
| 6.66852000 | 0.77088000 | 10.08087000 | #O |
| 8.13712000 | 5.28382000 | 8.78804000  | #O |
| 8.14031000 | 2.77229000 | 8.78469000  | #O |
| 6.67129000 | 0.77113000 | 7.47576000  | #O |
| 6.66098000 | 4.03303000 | 6.79553000  | #O |
| 8.14222000 | 2.07775000 | 5.48769000  | #O |
| 8.14144000 | 5.98243000 | 5.46962000  | #O |
| 6.66223000 | 4.02781000 | 4.21824000  | #O |
| 6.66540000 | 0.76905000 | 3.50429000  | #O |
| 8.13988000 | 5.24615000 | 2.04970000  | #O |
| 8.14148000 | 2.80422000 | 2.06721000  | #O |

|             |             |             |    |
|-------------|-------------|-------------|----|
| 6.66052000  | 0.77750000  | 0.92579000  | #O |
| 9.61272000  | 0.78582000  | 16.64831000 | #O |
| 11.12952000 | 5.25388000  | 15.50429000 | #O |
| 11.10995000 | 2.79263000  | 15.52076000 | #O |
| 9.65228000  | 0.70740000  | 14.06476000 | #O |
| 9.66329000  | 4.03310000  | 13.37831000 | #O |
| 11.10660000 | 2.06442000  | 12.08247000 | #O |
| 11.11019000 | 5.98917000  | 12.09295000 | #O |
| 9.60432000  | 4.02658000  | 10.80369000 | #O |
| 9.63027000  | 0.76706000  | 10.08635000 | #O |
| 11.09122000 | 5.28065000  | 8.78710000  | #O |
| 11.09483000 | 2.77291000  | 8.79087000  | #O |
| 9.63033000  | 0.77084000  | 7.48019000  | #O |
| 9.61980000  | 4.03445000  | 6.79487000  | #O |
| 11.10004000 | 2.07859000  | 5.48812000  | #O |
| 11.09576000 | 5.98148000  | 5.47168000  | #O |
| 9.61968000  | 4.02594000  | 4.21767000  | #O |
| 9.62612000  | 0.76907000  | 3.50634000  | #O |
| 11.10100000 | 5.24626000  | 2.05073000  | #O |
| 11.09926000 | 2.80578000  | 2.06501000  | #O |
| 9.61992000  | 0.77532000  | 0.92656000  | #O |
| 3.73977000  | 7.21418000  | 16.70026000 | #O |
| 5.19054000  | 11.72276000 | 15.54988000 | #O |
| 5.18276000  | 9.29520000  | 15.57277000 | #O |
| 3.68434000  | 7.31200000  | 14.11330000 | #O |
| 3.71135000  | 10.50685000 | 13.37581000 | #O |
| 5.17446000  | 8.56918000  | 12.07336000 | #O |
| 5.18196000  | 12.45352000 | 12.06369000 | #O |
| 3.69812000  | 10.50955000 | 10.78764000 | #O |
| 3.70883000  | 7.26650000  | 10.05049000 | #O |
| 5.18263000  | 11.76406000 | 8.78108000  | #O |
| 5.18503000  | 9.25702000  | 8.78603000  | #O |
| 3.71499000  | 7.27227000  | 7.46838000  | #O |
| 3.70406000  | 10.50713000 | 6.77924000  | #O |
| 5.18738000  | 8.57068000  | 5.46234000  | #O |
| 5.18579000  | 12.46500000 | 5.48848000  | #O |
| 3.70263000  | 10.51931000 | 4.20426000  | #O |
| 3.70770000  | 7.27273000  | 3.47052000  | #O |
| 5.18263000  | 11.73357000 | 2.04588000  | #O |
| 5.18176000  | 9.29381000  | 2.03736000  | #O |
| 3.69859000  | 7.26435000  | 0.88315000  | #O |
| 6.70280000  | 7.21957000  | 16.68403000 | #O |
| 8.13909000  | 11.72368000 | 15.54371000 | #O |
| 8.15191000  | 9.29598000  | 15.53494000 | #O |
| 6.64647000  | 7.35470000  | 14.09555000 | #O |
| 6.65983000  | 10.50849000 | 13.36752000 | #O |
| 8.14742000  | 8.57782000  | 12.07823000 | #O |
| 8.14715000  | 12.45687000 | 12.07168000 | #O |
| 6.66401000  | 10.51189000 | 10.78802000 | #O |
| 6.68272000  | 7.26906000  | 10.09845000 | #O |
| 8.14019000  | 11.76393000 | 8.78115000  | #O |
| 8.13978000  | 9.25570000  | 8.78350000  | #O |
| 6.66495000  | 7.27283000  | 7.48425000  | #O |
| 6.66279000  | 10.50736000 | 6.77960000  | #O |
| 8.14085000  | 8.56984000  | 5.45825000  | #O |



|             |             |             |    |
|-------------|-------------|-------------|----|
| 8.14248000  | 12.46540000 | 5.48833000  | #O |
| 6.66122000  | 10.52146000 | 4.20107000  | #O |
| 6.66337000  | 7.27410000  | 3.45882000  | #O |
| 8.14031000  | 11.73400000 | 2.04837000  | #O |
| 8.14184000  | 9.29366000  | 2.03417000  | #O |
| 6.65779000  | 7.26921000  | 0.87407000  | #O |
| 9.57198000  | 7.21896000  | 16.66190000 | #O |
| 11.10941000 | 11.73354000 | 15.54007000 | #O |
| 11.10441000 | 9.30434000  | 15.57592000 | #O |
| 9.66008000  | 7.33198000  | 14.09551000 | #O |
| 9.62896000  | 10.51530000 | 13.36995000 | #O |
| 11.11237000 | 8.57038000  | 12.08053000 | #O |
| 11.11388000 | 12.45333000 | 12.07017000 | #O |
| 9.62488000  | 10.50970000 | 10.78858000 | #O |
| 9.60957000  | 7.26940000  | 10.09379000 | #O |
| 11.10000000 | 11.76412000 | 8.78072000  | #O |
| 11.09138000 | 9.25740000  | 8.77953000  | #O |
| 9.61032000  | 7.27163000  | 7.48648000  | #O |
| 9.61809000  | 10.50848000 | 6.77852000  | #O |
| 11.09638000 | 8.57051000  | 5.46541000  | #O |
| 11.10260000 | 12.46552000 | 5.48975000  | #O |
| 9.62119000  | 10.52012000 | 4.20117000  | #O |
| 9.61933000  | 7.27489000  | 3.45957000  | #O |
| 11.10027000 | 11.73374000 | 2.04584000  | #O |
| 11.09976000 | 9.29374000  | 2.03630000  | #O |
| 9.62383000  | 7.26259000  | 0.87398000  | #O |
| 0.75243000  | 0.76578000  | 16.66287000 | #O |
| 2.18844000  | 5.25583000  | 15.49389000 | #O |
| 2.20157000  | 2.78519000  | 15.47902000 | #O |
| 0.74262000  | 0.75726000  | 14.07609000 | #O |
| 0.74093000  | 4.01735000  | 13.34512000 | #O |
| 2.22791000  | 2.06287000  | 12.09291000 | #O |
| 2.22253000  | 5.98427000  | 12.10394000 | #O |
| 0.74998000  | 4.02872000  | 10.79410000 | #O |
| 0.75167000  | 0.77088000  | 10.07923000 | #O |
| 2.22189000  | 5.27784000  | 8.78348000  | #O |
| 2.22516000  | 2.77224000  | 8.78267000  | #O |
| 0.75479000  | 0.77265000  | 7.47472000  | #O |
| 0.74270000  | 4.03415000  | 6.79210000  | #O |
| 2.22510000  | 2.07956000  | 5.48920000  | #O |
| 2.22352000  | 5.98181000  | 5.47142000  | #O |
| 0.74349000  | 4.02817000  | 4.21810000  | #O |
| 0.74765000  | 0.77035000  | 3.50651000  | #O |
| 2.22260000  | 5.24549000  | 2.05595000  | #O |
| 2.22420000  | 2.80436000  | 2.06633000  | #O |
| 0.74397000  | 0.77749000  | 0.92715000  | #O |
| 0.74051000  | 7.25980000  | 16.72464000 | #O |
| 2.23040000  | 11.73157000 | 15.53428000 | #O |
| 2.23205000  | 9.29711000  | 15.57977000 | #O |
| 0.76634000  | 7.30347000  | 14.12427000 | #O |
| 0.74513000  | 10.50532000 | 13.37871000 | #O |
| 2.22407000  | 8.57126000  | 12.09109000 | #O |
| 2.22201000  | 12.45588000 | 12.08466000 | #O |
| 0.75025000  | 10.50835000 | 10.78776000 | #O |
| 0.73449000  | 7.27211000  | 10.05071000 | #O |

|             |             |             |     |
|-------------|-------------|-------------|-----|
| 2.22197000  | 11.76369000 | 8.77843000  | #O  |
| 2.22212000  | 9.26037000  | 8.77577000  | #O  |
| 0.73491000  | 7.26867000  | 7.47640000  | #O  |
| 0.74255000  | 10.50822000 | 6.78013000  | #O  |
| 2.22318000  | 8.56922000  | 5.46434000  | #O  |
| 2.22519000  | 12.46525000 | 5.49095000  | #O  |
| 0.74367000  | 10.52067000 | 4.20412000  | #O  |
| 0.74000000  | 7.27452000  | 3.47034000  | #O  |
| 2.22265000  | 11.73315000 | 2.04988000  | #O  |
| 2.22327000  | 9.29324000  | 2.04369000  | #O  |
| 0.74944000  | 7.26685000  | 0.88351000  | #O  |
| 3.69594000  | 4.05667000  | 15.28476000 | #Ti |
| 5.18499000  | 0.73983000  | 15.54550000 | #Ti |
| 3.68799000  | 0.78139000  | 12.20742000 | #Ti |
| 5.19449000  | 4.02097000  | 12.07068000 | #Ti |
| 3.68154000  | 4.01974000  | 8.82669000  | #Ti |
| 5.04029000  | 0.77560000  | 8.79413000  | #Ti |
| 3.70225000  | 0.80729000  | 5.38135000  | #Ti |
| 5.18786000  | 4.05943000  | 5.61466000  | #Ti |
| 3.70319000  | 4.02340000  | 2.41166000  | #Ti |
| 5.17767000  | 0.77573000  | 2.01569000  | #Ti |
| 6.63846000  | 3.92907000  | 15.26702000 | #Ti |
| 8.15264000  | 0.75370000  | 15.53675000 | #Ti |
| 6.67463000  | 0.79582000  | 12.19433000 | #Ti |
| 8.15008000  | 4.08476000  | 12.13151000 | #Ti |
| 6.63886000  | 4.01968000  | 8.88545000  | #Ti |
| 8.00030000  | 0.77445000  | 8.77438000  | #Ti |
| 6.65618000  | 0.80176000  | 5.37599000  | #Ti |
| 8.13437000  | 4.05381000  | 5.62011000  | #Ti |
| 6.66180000  | 4.02258000  | 2.40967000  | #Ti |
| 8.13644000  | 0.77609000  | 2.01464000  | #Ti |
| 9.59060000  | 4.05686000  | 15.34551000 | #Ti |
| 11.10624000 | 0.78392000  | 15.56731000 | #Ti |
| 9.60943000  | 0.78933000  | 12.20423000 | #Ti |
| 11.06079000 | 4.01802000  | 12.02639000 | #Ti |
| 9.59163000  | 4.02235000  | 8.84587000  | #Ti |
| 10.95856000 | 0.77614000  | 8.79504000  | #Ti |
| 9.61433000  | 0.80403000  | 5.37876000  | #Ti |
| 11.09552000 | 4.06152000  | 5.61087000  | #Ti |
| 9.61994000  | 4.02418000  | 2.41116000  | #Ti |
| 11.09556000 | 0.77600000  | 2.01581000  | #Ti |
| 3.70438000  | 10.51241000 | 15.19381000 | #Ti |
| 5.25200000  | 7.25698000  | 15.59417000 | #Ti |
| 3.71517000  | 7.28572000  | 12.30403000 | #Ti |
| 5.17858000  | 10.56299000 | 11.98991000 | #Ti |
| 3.66261000  | 10.51725000 | 8.79233000  | #Ti |
| 5.09242000  | 7.26360000  | 8.68968000  | #Ti |
| 3.69686000  | 7.29840000  | 5.33692000  | #Ti |
| 5.17963000  | 10.55036000 | 5.58430000  | #Ti |
| 3.70245000  | 10.51751000 | 2.39082000  | #Ti |
| 5.17534000  | 7.26595000  | 1.96619000  | #Ti |
| 6.66941000  | 10.48271000 | 15.18203000 | #Ti |
| 8.17397000  | 7.26202000  | 15.21338000 | #Ti |
| 6.63939000  | 7.29994000  | 11.96960000 | #Ti |
| 8.14068000  | 10.52350000 | 11.99477000 | #Ti |

|             |             |             |     |
|-------------|-------------|-------------|-----|
| 6.62172000  | 10.51456000 | 8.79392000  | #Ti |
| 8.11862000  | 7.26499000  | 8.66320000  | #Ti |
| 6.66043000  | 7.29602000  | 5.30213000  | #Ti |
| 8.13751000  | 10.55243000 | 5.58284000  | #Ti |
| 6.66115000  | 10.51592000 | 2.38791000  | #Ti |
| 8.13998000  | 7.26659000  | 1.94962000  | #Ti |
| 9.62942000  | 10.51764000 | 15.18596000 | #Ti |
| 11.04861000 | 7.26727000  | 15.63579000 | #Ti |
| 9.65106000  | 7.29904000  | 11.94773000 | #Ti |
| 11.10177000 | 10.56002000 | 11.99455000 | #Ti |
| 9.58217000  | 10.51487000 | 8.79502000  | #Ti |
| 11.15441000 | 7.26271000  | 8.67384000  | #Ti |
| 9.61900000  | 7.29620000  | 5.30215000  | #Ti |
| 11.09525000 | 10.55195000 | 5.58485000  | #Ti |
| 9.62025000  | 10.51803000 | 2.38783000  | #Ti |
| 11.10570000 | 7.26619000  | 1.96408000  | #Ti |
| 0.73078000  | 4.00419000  | 15.14913000 | #Ti |
| 2.22886000  | 0.78497000  | 15.56823000 | #Ti |
| 0.75688000  | 0.78691000  | 12.20997000 | #Ti |
| 2.24596000  | 4.06344000  | 12.01260000 | #Ti |
| 0.71936000  | 4.01692000  | 8.84844000  | #Ti |
| 2.08141000  | 0.77592000  | 8.78087000  | #Ti |
| 0.73366000  | 0.80732000  | 5.38022000  | #Ti |
| 2.21929000  | 4.05189000  | 5.60910000  | #Ti |
| 0.74386000  | 4.02216000  | 2.40915000  | #Ti |
| 2.21860000  | 0.77586000  | 2.01781000  | #Ti |
| 0.74765000  | 10.51568000 | 15.19781000 | #Ti |
| 2.22601000  | 7.26994000  | 15.66139000 | #Ti |
| 0.73206000  | 7.27990000  | 12.31441000 | #Ti |
| 2.22128000  | 10.50468000 | 11.99799000 | #Ti |
| 0.70545000  | 10.51600000 | 8.79328000  | #Ti |
| 2.20319000  | 7.26334000  | 8.90848000  | #Ti |
| 0.74942000  | 7.30112000  | 5.33201000  | #Ti |
| 2.21963000  | 10.56489000 | 5.58535000  | #Ti |
| 0.74365000  | 10.51570000 | 2.39064000  | #Ti |
| 2.22447000  | 7.26573000  | 1.98104000  | #Ti |

Rut-Glu-D2

1.000000000

11.834800 0.000000 0.000000

0.000000 12.992946 0.000000

0.000000 0.000000 30.000000

H C N O Ti

9 5 1 164 80

Cartesian

|            |            |             |    |
|------------|------------|-------------|----|
| 6.05028000 | 5.68505000 | 20.45777000 | #H |
| 5.78537000 | 5.86467000 | 18.72348000 | #H |
| 5.86967000 | 3.04951000 | 18.97100000 | #H |
| 5.12396000 | 3.54548000 | 20.51145000 | #H |
| 8.22554000 | 4.50402000 | 19.99670000 | #H |
| 9.42062000 | 6.85962000 | 17.59735000 | #H |
| 7.65312000 | 7.07059000 | 18.73793000 | #H |
| 8.59062000 | 6.75581000 | 20.05421000 | #H |
| 2.24175000 | 4.60006000 | 19.04463000 | #H |

|             |            |             |    |
|-------------|------------|-------------|----|
| 6.18765000  | 5.18396000 | 19.48875000 | #C |
| 5.34810000  | 3.86334000 | 19.48580000 | #C |
| 4.04313000  | 4.08471000 | 18.75703000 | #C |
| 7.98125000  | 4.39582000 | 17.87255000 | #C |
| 7.70951000  | 5.08298000 | 19.21410000 | #C |
| 8.34652000  | 6.41991000 | 19.12275000 | #N |
| 3.03741000  | 4.41525000 | 19.58911000 | #O |
| 3.86228000  | 4.02084000 | 17.53953000 | #O |
| 9.16590000  | 4.24910000 | 17.43457000 | #O |
| 6.93076000  | 4.07867000 | 17.22300000 | #O |
| 3.71609000  | 0.79468000 | 16.64165000 | #O |
| 5.18285000  | 5.26741000 | 15.36985000 | #O |
| 5.16571000  | 2.76271000 | 15.35518000 | #O |
| 3.69481000  | 0.72604000 | 14.05927000 | #O |
| 3.67707000  | 4.03325000 | 13.39177000 | #O |
| 5.17623000  | 2.06705000 | 12.09154000 | #O |
| 5.18022000  | 5.99400000 | 12.10204000 | #O |
| 3.70953000  | 4.03349000 | 10.79802000 | #O |
| 3.70524000  | 0.77273000 | 10.07904000 | #O |
| 5.17844000  | 5.28499000 | 8.78011000  | #O |
| 5.17527000  | 2.77534000 | 8.78912000  | #O |
| 3.71106000  | 0.77485000 | 7.47137000  | #O |
| 3.69733000  | 4.03356000 | 6.78990000  | #O |
| 5.18002000  | 2.08076000 | 5.48118000  | #O |
| 5.17577000  | 5.98386000 | 5.47193000  | #O |
| 3.69919000  | 4.02715000 | 4.21367000  | #O |
| 3.70265000  | 0.77092000 | 3.49923000  | #O |
| 5.17714000  | 5.24552000 | 2.04796000  | #O |
| 5.17782000  | 2.80483000 | 2.06155000  | #O |
| 3.69506000  | 0.77656000 | 0.91900000  | #O |
| 6.67171000  | 0.83850000 | 16.61810000 | #O |
| 8.14579000  | 5.29366000 | 15.20535000 | #O |
| 8.18507000  | 2.75518000 | 15.27243000 | #O |
| 6.65408000  | 0.70022000 | 14.04095000 | #O |
| 6.65102000  | 4.01614000 | 13.33714000 | #O |
| 8.14541000  | 2.06609000 | 12.10215000 | #O |
| 8.14039000  | 5.99965000 | 12.11075000 | #O |
| 6.66227000  | 4.03620000 | 10.80728000 | #O |
| 6.66587000  | 0.77580000 | 10.08046000 | #O |
| 8.13113000  | 5.28753000 | 8.78716000  | #O |
| 8.13436000  | 2.77432000 | 8.78265000  | #O |
| 6.66395000  | 0.77481000 | 7.47512000  | #O |
| 6.65617000  | 4.03376000 | 6.79175000  | #O |
| 8.13773000  | 2.07865000 | 5.48218000  | #O |
| 8.13703000  | 5.98322000 | 5.47339000  | #O |
| 6.65657000  | 4.03149000 | 4.21588000  | #O |
| 6.65917000  | 0.76968000 | 3.49880000  | #O |
| 8.13404000  | 5.24487000 | 2.04843000  | #O |
| 8.13482000  | 2.80303000 | 2.06703000  | #O |
| 6.65440000  | 0.77845000 | 0.91805000  | #O |
| 9.61057000  | 0.79599000 | 16.63162000 | #O |
| 11.13049000 | 5.26996000 | 15.47279000 | #O |
| 11.11253000 | 2.80005000 | 15.50571000 | #O |
| 9.64626000  | 0.71299000 | 14.05040000 | #O |
| 9.66043000  | 4.03127000 | 13.36078000 | #O |

|             |             |             |    |
|-------------|-------------|-------------|----|
| 11.10550000 | 2.06575000  | 12.07434000 | #O |
| 11.10435000 | 5.99520000  | 12.08965000 | #O |
| 9.60179000  | 4.03262000  | 10.79567000 | #O |
| 9.62666000  | 0.77274000  | 10.08083000 | #O |
| 11.09213000 | 5.28393000  | 8.78178000  | #O |
| 11.09066000 | 2.77597000  | 8.78755000  | #O |
| 9.62596000  | 0.77518000  | 7.47364000  | #O |
| 9.61376000  | 4.03446000  | 6.79281000  | #O |
| 11.09623000 | 2.08167000  | 5.48305000  | #O |
| 11.09057000 | 5.98404000  | 5.47850000  | #O |
| 9.61658000  | 4.02915000  | 4.21547000  | #O |
| 9.62091000  | 0.77042000  | 3.49932000  | #O |
| 11.09487000 | 5.24495000  | 2.04987000  | #O |
| 11.09408000 | 2.80466000  | 2.06199000  | #O |
| 9.61282000  | 0.77684000  | 0.91871000  | #O |
| 3.72315000  | 7.22870000  | 16.67445000 | #O |
| 5.18898000  | 11.72731000 | 15.54090000 | #O |
| 5.18340000  | 9.29705000  | 15.56388000 | #O |
| 3.67977000  | 7.31733000  | 14.09347000 | #O |
| 3.70769000  | 10.51205000 | 13.36949000 | #O |
| 5.17542000  | 8.57745000  | 12.06690000 | #O |
| 5.17748000  | 12.46047000 | 12.05605000 | #O |
| 3.69527000  | 10.51350000 | 10.78445000 | #O |
| 3.71284000  | 7.27315000  | 10.08023000 | #O |
| 5.17876000  | 11.76846000 | 8.77934000  | #O |
| 5.17664000  | 9.25950000  | 8.77602000  | #O |
| 3.68455000  | 7.27518000  | 7.47681000  | #O |
| 3.69688000  | 10.51356000 | 6.77635000  | #O |
| 5.17629000  | 8.57387000  | 5.46188000  | #O |
| 5.18031000  | 12.46794000 | 5.48373000  | #O |
| 3.69822000  | 10.52292000 | 4.20024000  | #O |
| 3.69728000  | 7.27303000  | 3.47033000  | #O |
| 5.17721000  | 11.73539000 | 2.04278000  | #O |
| 5.17562000  | 9.29516000  | 2.03820000  | #O |
| 3.69182000  | 7.26709000  | 0.88733000  | #O |
| 6.71184000  | 7.20589000  | 16.61732000 | #O |
| 8.14040000  | 11.72626000 | 15.53603000 | #O |
| 8.14722000  | 9.29407000  | 15.52313000 | #O |
| 6.63752000  | 7.36437000  | 14.07137000 | #O |
| 6.65867000  | 10.51855000 | 13.36086000 | #O |
| 8.13991000  | 8.58091000  | 12.06434000 | #O |
| 8.14370000  | 12.46178000 | 12.05710000 | #O |
| 6.65811000  | 10.51633000 | 10.78226000 | #O |
| 6.66439000  | 7.27483000  | 10.08249000 | #O |
| 8.13366000  | 11.77114000 | 8.77940000  | #O |
| 8.13417000  | 9.26239000  | 8.78223000  | #O |
| 6.65842000  | 7.27866000  | 7.46396000  | #O |
| 6.65652000  | 10.51468000 | 6.77527000  | #O |
| 8.13612000  | 8.57575000  | 5.46081000  | #O |
| 8.13798000  | 12.46845000 | 5.48209000  | #O |
| 6.65446000  | 10.52420000 | 4.19920000  | #O |
| 6.65640000  | 7.27403000  | 3.46565000  | #O |
| 8.13466000  | 11.73553000 | 2.04634000  | #O |
| 8.13553000  | 9.29509000  | 2.03903000  | #O |
| 6.65388000  | 7.27173000  | 0.87889000  | #O |

|             |             |             |    |
|-------------|-------------|-------------|----|
| 9.59897000  | 7.21669000  | 16.67800000 | #O |
| 11.10071000 | 11.73179000 | 15.53560000 | #O |
| 11.10539000 | 9.29703000  | 15.55138000 | #O |
| 9.64370000  | 7.35979000  | 14.07476000 | #O |
| 9.62143000  | 10.51704000 | 13.36290000 | #O |
| 11.11079000 | 8.58234000  | 12.07586000 | #O |
| 11.10981000 | 12.46143000 | 12.06358000 | #O |
| 9.62092000  | 10.51656000 | 10.78316000 | #O |
| 9.63287000  | 7.27795000  | 10.09644000 | #O |
| 11.09602000 | 11.76933000 | 8.77790000  | #O |
| 11.09109000 | 9.26311000  | 8.77666000  | #O |
| 9.60719000  | 7.27456000  | 7.49619000  | #O |
| 9.61157000  | 10.51481000 | 6.77671000  | #O |
| 11.09061000 | 8.57303000  | 5.46980000  | #O |
| 11.09741000 | 12.46829000 | 5.48511000  | #O |
| 9.61721000  | 10.52142000 | 4.19998000  | #O |
| 9.61085000  | 7.27327000  | 3.47060000  | #O |
| 11.09424000 | 11.73525000 | 2.04266000  | #O |
| 11.09415000 | 9.29485000  | 2.04130000  | #O |
| 9.61772000  | 7.26615000  | 0.88692000  | #O |
| 0.74700000  | 0.76680000  | 16.64610000 | #O |
| 2.18817000  | 5.26551000  | 15.47773000 | #O |
| 2.20121000  | 2.79147000  | 15.47862000 | #O |
| 0.74536000  | 0.75672000  | 14.06412000 | #O |
| 0.74221000  | 4.01587000  | 13.33707000 | #O |
| 2.22550000  | 2.06954000  | 12.08139000 | #O |
| 2.21995000  | 5.99221000  | 12.09965000 | #O |
| 0.74897000  | 4.03737000  | 10.79066000 | #O |
| 0.75004000  | 0.77472000  | 10.07913000 | #O |
| 2.21927000  | 5.28149000  | 8.78535000  | #O |
| 2.22017000  | 2.77374000  | 8.77970000  | #O |
| 0.74586000  | 0.77636000  | 7.47461000  | #O |
| 0.73981000  | 4.03348000  | 6.78874000  | #O |
| 2.22053000  | 2.07945000  | 5.48187000  | #O |
| 2.22029000  | 5.98153000  | 5.47217000  | #O |
| 0.73807000  | 4.03121000  | 4.21565000  | #O |
| 0.74130000  | 0.76978000  | 3.50054000  | #O |
| 2.21647000  | 5.24383000  | 2.05058000  | #O |
| 2.21742000  | 2.80290000  | 2.06392000  | #O |
| 0.73707000  | 0.77776000  | 0.91966000  | #O |
| 0.74525000  | 7.26709000  | 16.67545000 | #O |
| 2.23157000  | 11.73297000 | 15.53374000 | #O |
| 2.22651000  | 9.29692000  | 15.54920000 | #O |
| 0.72370000  | 7.30190000  | 14.09451000 | #O |
| 0.74389000  | 10.52085000 | 13.37116000 | #O |
| 2.21902000  | 8.57558000  | 12.08812000 | #O |
| 2.22164000  | 12.45995000 | 12.07127000 | #O |
| 0.74587000  | 10.51466000 | 10.78400000 | #O |
| 0.73675000  | 7.27643000  | 10.08253000 | #O |
| 2.21701000  | 11.77216000 | 8.77592000  | #O |
| 2.21872000  | 9.26677000  | 8.77915000  | #O |
| 0.74941000  | 7.27564000  | 7.47472000  | #O |
| 0.73842000  | 10.51536000 | 6.77676000  | #O |
| 2.21835000  | 8.57640000  | 5.46156000  | #O |
| 2.22007000  | 12.46901000 | 5.48462000  | #O |

|             |             |             |     |
|-------------|-------------|-------------|-----|
| 0.73641000  | 10.52395000 | 4.20199000  | #O  |
| 0.73644000  | 7.27188000  | 3.47837000  | #O  |
| 2.21677000  | 11.73506000 | 2.04607000  | #O  |
| 2.21726000  | 9.29456000  | 2.04452000  | #O  |
| 0.73851000  | 7.26981000  | 0.88889000  | #O  |
| 3.69778000  | 4.05840000  | 15.29268000 | #Ti |
| 5.18414000  | 0.74616000  | 15.53613000 | #Ti |
| 3.69810000  | 0.79445000  | 12.19420000 | #Ti |
| 5.19582000  | 4.05274000  | 12.07213000 | #Ti |
| 3.66751000  | 4.01274000  | 8.82182000  | #Ti |
| 5.03665000  | 0.78032000  | 8.77744000  | #Ti |
| 3.69235000  | 0.80796000  | 5.37060000  | #Ti |
| 5.18197000  | 4.05164000  | 5.61392000  | #Ti |
| 3.69761000  | 4.02241000  | 2.40736000  | #Ti |
| 5.17101000  | 0.77640000  | 2.00659000  | #Ti |
| 6.64196000  | 3.93696000  | 15.27285000 | #Ti |
| 8.15190000  | 0.76130000  | 15.51919000 | #Ti |
| 6.65986000  | 0.80591000  | 12.18255000 | #Ti |
| 8.15381000  | 4.06072000  | 12.13818000 | #Ti |
| 6.62436000  | 4.03800000  | 8.88516000  | #Ti |
| 7.99399000  | 0.77924000  | 8.77554000  | #Ti |
| 6.65499000  | 0.80115000  | 5.36668000  | #Ti |
| 8.12791000  | 4.06034000  | 5.61519000  | #Ti |
| 6.65599000  | 4.02340000  | 2.40692000  | #Ti |
| 8.13007000  | 0.77646000  | 2.00555000  | #Ti |
| 9.59190000  | 4.06792000  | 15.38058000 | #Ti |
| 11.10194000 | 0.78585000  | 15.55215000 | #Ti |
| 9.61999000  | 0.79752000  | 12.18510000 | #Ti |
| 11.04981000 | 4.05124000  | 12.02405000 | #Ti |
| 9.57603000  | 4.01356000  | 8.84011000  | #Ti |
| 10.95650000 | 0.78119000  | 8.77680000  | #Ti |
| 9.60583000  | 0.80437000  | 5.36861000  | #Ti |
| 11.09081000 | 4.04974000  | 5.61166000  | #Ti |
| 9.61446000  | 4.02330000  | 2.40895000  | #Ti |
| 11.08909000 | 0.77633000  | 2.00735000  | #Ti |
| 3.70399000  | 10.50877000 | 15.18543000 | #Ti |
| 5.21534000  | 7.26108000  | 15.55019000 | #Ti |
| 3.70704000  | 7.30057000  | 12.21946000 | #Ti |
| 5.17487000  | 10.55878000 | 11.98314000 | #Ti |
| 3.64709000  | 10.53821000 | 8.78586000  | #Ti |
| 5.01585000  | 7.26593000  | 8.76880000  | #Ti |
| 3.69491000  | 7.29877000  | 5.32494000  | #Ti |
| 5.17150000  | 10.55770000 | 5.57970000  | #Ti |
| 3.69668000  | 10.51792000 | 2.38608000  | #Ti |
| 5.17279000  | 7.26570000  | 1.96553000  | #Ti |
| 6.66867000  | 10.50647000 | 15.17523000 | #Ti |
| 8.04196000  | 7.25749000  | 15.29190000 | #Ti |
| 6.65836000  | 7.30432000  | 11.94167000 | #Ti |
| 8.13515000  | 10.55940000 | 11.98119000 | #Ti |
| 6.60510000  | 10.49763000 | 8.78252000  | #Ti |
| 8.07092000  | 7.26973000  | 8.62619000  | #Ti |
| 6.64721000  | 7.29614000  | 5.31851000  | #Ti |
| 8.13059000  | 10.54369000 | 5.57641000  | #Ti |
| 6.65524000  | 10.51686000 | 2.38523000  | #Ti |
| 8.13365000  | 7.26622000  | 1.96241000  | #Ti |

|             |             |             |     |
|-------------|-------------|-------------|-----|
| 9.62463000  | 10.50096000 | 15.17908000 | #Ti |
| 11.18649000 | 7.27204000  | 15.53001000 | #Ti |
| 9.62244000  | 7.31124000  | 12.18332000 | #Ti |
| 11.09574000 | 10.54852000 | 11.98564000 | #Ti |
| 9.56626000  | 10.53910000 | 8.78491000  | #Ti |
| 10.99656000 | 7.26661000  | 8.85583000  | #Ti |
| 9.61707000  | 7.29417000  | 5.31596000  | #Ti |
| 11.08902000 | 10.56170000 | 5.58144000  | #Ti |
| 9.61483000  | 10.51800000 | 2.38562000  | #Ti |
| 11.09945000 | 7.26513000  | 1.97706000  | #Ti |
| 0.73233000  | 4.00047000  | 15.13705000 | #Ti |
| 2.22739000  | 0.78890000  | 15.55660000 | #Ti |
| 0.73761000  | 0.79786000  | 12.19541000 | #Ti |
| 2.24723000  | 4.04208000  | 12.00572000 | #Ti |
| 0.70501000  | 4.03434000  | 8.84778000  | #Ti |
| 2.07673000  | 0.78141000  | 8.78134000  | #Ti |
| 0.73759000  | 0.80655000  | 5.37026000  | #Ti |
| 2.21327000  | 4.06419000  | 5.60243000  | #Ti |
| 0.73821000  | 4.02228000  | 2.40619000  | #Ti |
| 2.21297000  | 0.77602000  | 2.00775000  | #Ti |
| 0.74616000  | 10.53800000 | 15.18745000 | #Ti |
| 2.27071000  | 7.27349000  | 15.57550000 | #Ti |
| 0.75082000  | 7.28674000  | 12.18162000 | #Ti |
| 2.21642000  | 10.54999000 | 11.98898000 | #Ti |
| 0.69024000  | 10.50190000 | 8.78465000  | #Ti |
| 2.09623000  | 7.26688000  | 8.73723000  | #Ti |
| 0.72988000  | 7.30132000  | 5.35090000  | #Ti |
| 2.21324000  | 10.55238000 | 5.57889000  | #Ti |
| 0.73779000  | 10.51662000 | 2.38775000  | #Ti |
| 2.21352000  | 7.26497000  | 1.98233000  | #Ti |

#### Rut-Gln-D

1.000000000

11.834800 0.000000 0.000000

0.000000 12.992946 0.000000

0.000000 0.000000 30.000000

H C N O Ti

10 5 2 163 80

Cartesian

6.05289000 5.60198000 20.47645000 #H

5.78617000 5.83703000 18.74825000 #H

5.87046000 3.02547000 18.88034000 #H

5.16408000 3.43394000 20.45113000 #H

8.24032000 4.47343000 19.99180000 #H

9.44812000 6.85646000 17.58641000 #H

7.65748000 7.04029000 18.71916000 #H

8.54999000 6.74642000 20.07620000 #H

2.06648000 4.52068000 19.07852000 #H

3.03056000 4.28924000 20.51543000 #H

6.18894000 5.13256000 19.49069000 #C

5.35164000 3.81377000 19.43642000 #C

4.02566000 4.04792000 18.72782000 #C

7.99282000 4.39089000 17.86698000 #C

7.71421000 5.05493000 19.21799000 #C



|             |            |             |    |
|-------------|------------|-------------|----|
| 8.33802000  | 6.39788000 | 19.14117000 | #N |
| 2.96012000  | 4.30049000 | 19.50622000 | #N |
| 3.89968000  | 4.04912000 | 17.48173000 | #O |
| 9.17639000  | 4.24697000 | 17.43151000 | #O |
| 6.94063000  | 4.09230000 | 17.20941000 | #O |
| 3.72012000  | 0.80310000 | 16.64338000 | #O |
| 5.19314000  | 5.27787000 | 15.34540000 | #O |
| 5.17292000  | 2.76728000 | 15.35076000 | #O |
| 3.69699000  | 0.72857000 | 14.06134000 | #O |
| 3.67767000  | 4.03647000 | 13.40286000 | #O |
| 5.17884000  | 2.06929000 | 12.09760000 | #O |
| 5.18378000  | 5.99934000 | 12.10973000 | #O |
| 3.71235000  | 4.03713000 | 10.80839000 | #O |
| 3.70714000  | 0.77281000 | 10.08223000 | #O |
| 5.17872000  | 5.28739000 | 8.78287000  | #O |
| 5.17426000  | 2.77734000 | 8.79582000  | #O |
| 3.71107000  | 0.77731000 | 7.47261000  | #O |
| 3.69634000  | 4.03485000 | 6.79711000  | #O |
| 5.17820000  | 2.08245000 | 5.48182000  | #O |
| 5.17482000  | 5.98642000 | 5.47590000  | #O |
| 3.69659000  | 4.03313000 | 4.21953000  | #O |
| 3.69999000  | 0.76974000 | 3.49970000  | #O |
| 5.17462000  | 5.24647000 | 2.05036000  | #O |
| 5.17324000  | 2.80553000 | 2.06872000  | #O |
| 3.69101000  | 0.77887000 | 0.91986000  | #O |
| 6.67439000  | 0.84409000 | 16.61974000 | #O |
| 8.15431000  | 5.30028000 | 15.19991000 | #O |
| 8.18862000  | 2.75757000 | 15.27000000 | #O |
| 6.65892000  | 0.70286000 | 14.04276000 | #O |
| 6.66224000  | 4.01578000 | 13.33402000 | #O |
| 8.14831000  | 2.06887000 | 12.09999000 | #O |
| 8.14327000  | 6.00382000 | 12.11047000 | #O |
| 6.65874000  | 4.03962000 | 10.81090000 | #O |
| 6.66645000  | 0.77670000 | 10.08119000 | #O |
| 8.13184000  | 5.29007000 | 8.78946000  | #O |
| 8.13474000  | 2.77631000 | 8.78460000  | #O |
| 6.66350000  | 0.77878000 | 7.47527000  | #O |
| 6.65575000  | 4.03413000 | 6.79492000  | #O |
| 8.13705000  | 2.08078000 | 5.48149000  | #O |
| 8.13647000  | 5.98540000 | 5.47637000  | #O |
| 6.65375000  | 4.03471000 | 4.21978000  | #O |
| 6.65707000  | 0.76846000 | 3.49921000  | #O |
| 8.13012000  | 5.24585000 | 2.05058000  | #O |
| 8.13125000  | 2.80442000 | 2.06849000  | #O |
| 6.64970000  | 0.78255000 | 0.91857000  | #O |
| 9.61461000  | 0.80141000 | 16.63311000 | #O |
| 11.13446000 | 5.27411000 | 15.47045000 | #O |
| 11.11759000 | 2.80316000 | 15.50412000 | #O |
| 9.64920000  | 0.71729000 | 14.05155000 | #O |
| 9.66329000  | 4.03276000 | 13.35498000 | #O |
| 11.10795000 | 2.06815000 | 12.07282000 | #O |
| 11.10679000 | 5.99948000 | 12.08957000 | #O |
| 9.60548000  | 4.03667000 | 10.79115000 | #O |
| 9.62690000  | 0.77397000 | 10.08004000 | #O |
| 11.09388000 | 5.28621000 | 8.78376000  | #O |

|             |             |             |    |
|-------------|-------------|-------------|----|
| 11.09150000 | 2.77747000  | 8.78971000  | #O |
| 9.62570000  | 0.77706000  | 7.47312000  | #O |
| 9.61317000  | 4.03574000  | 6.79411000  | #O |
| 11.09440000 | 2.08325000  | 5.48158000  | #O |
| 11.08961000 | 5.98626000  | 5.48014000  | #O |
| 9.61386000  | 4.03396000  | 4.21765000  | #O |
| 9.61721000  | 0.76979000  | 3.49890000  | #O |
| 11.09169000 | 5.24553000  | 2.05102000  | #O |
| 11.09070000 | 2.80496000  | 2.06816000  | #O |
| 9.60889000  | 0.77935000  | 0.91891000  | #O |
| 3.72837000  | 7.22903000  | 16.67428000 | #O |
| 5.19179000  | 11.73298000 | 15.54102000 | #O |
| 5.18758000  | 9.30340000  | 15.56746000 | #O |
| 3.68099000  | 7.33009000  | 14.09431000 | #O |
| 3.70963000  | 10.51518000 | 13.36975000 | #O |
| 5.17838000  | 8.58229000  | 12.06570000 | #O |
| 5.18087000  | 12.46435000 | 12.05972000 | #O |
| 3.69709000  | 10.52019000 | 10.78362000 | #O |
| 3.71408000  | 7.27575000  | 10.08167000 | #O |
| 5.17996000  | 11.77046000 | 8.77779000  | #O |
| 5.17695000  | 9.26135000  | 8.77740000  | #O |
| 3.68412000  | 7.27711000  | 7.47868000  | #O |
| 3.69628000  | 10.51432000 | 6.77564000  | #O |
| 5.17481000  | 8.57568000  | 5.46226000  | #O |
| 5.17958000  | 12.46973000 | 5.48453000  | #O |
| 3.69693000  | 10.52730000 | 4.19920000  | #O |
| 3.69543000  | 7.27337000  | 3.47166000  | #O |
| 5.17471000  | 11.73625000 | 2.04001000  | #O |
| 5.17294000  | 9.29587000  | 2.03833000  | #O |
| 3.68991000  | 7.26646000  | 0.88865000  | #O |
| 6.71552000  | 7.20710000  | 16.61919000 | #O |
| 8.14543000  | 11.73050000 | 15.53807000 | #O |
| 8.15009000  | 9.29908000  | 15.52476000 | #O |
| 6.64190000  | 7.37299000  | 14.07179000 | #O |
| 6.66081000  | 10.52218000 | 13.36165000 | #O |
| 8.14220000  | 8.58545000  | 12.06467000 | #O |
| 8.14623000  | 12.46566000 | 12.05794000 | #O |
| 6.65929000  | 10.52072000 | 10.78190000 | #O |
| 6.66529000  | 7.27809000  | 10.08335000 | #O |
| 8.13377000  | 11.77339000 | 8.77720000  | #O |
| 8.13504000  | 9.26432000  | 8.78192000  | #O |
| 6.65907000  | 7.28085000  | 7.46541000  | #O |
| 6.65555000  | 10.51613000 | 6.77468000  | #O |
| 8.13582000  | 8.57771000  | 5.46125000  | #O |
| 8.13622000  | 12.47051000 | 5.48392000  | #O |
| 6.65348000  | 10.52586000 | 4.19850000  | #O |
| 6.65509000  | 7.27526000  | 3.46686000  | #O |
| 8.13131000  | 11.73610000 | 2.04130000  | #O |
| 8.13290000  | 9.29569000  | 2.03914000  | #O |
| 6.65157000  | 7.27200000  | 0.88014000  | #O |
| 9.60502000  | 7.22670000  | 16.67371000 | #O |
| 11.10530000 | 11.73625000 | 15.53660000 | #O |
| 11.10895000 | 9.30343000  | 15.55290000 | #O |
| 9.64624000  | 7.36736000  | 14.07252000 | #O |
| 9.62353000  | 10.52064000 | 13.36314000 | #O |

|             |             |             |    |
|-------------|-------------|-------------|----|
| 11.11219000 | 8.58725000  | 12.07302000 | #O |
| 11.11088000 | 12.46440000 | 12.06487000 | #O |
| 9.62212000  | 10.52227000 | 10.78191000 | #O |
| 9.63491000  | 7.28087000  | 10.09665000 | #O |
| 11.09703000 | 11.77136000 | 8.77543000  | #O |
| 11.09148000 | 9.26504000  | 8.77651000  | #O |
| 9.60826000  | 7.27688000  | 7.49675000  | #O |
| 9.61077000  | 10.51597000 | 6.77598000  | #O |
| 11.09023000 | 8.57489000  | 5.47007000  | #O |
| 11.09619000 | 12.47014000 | 5.48673000  | #O |
| 9.61565000  | 10.52562000 | 4.19896000  | #O |
| 9.60996000  | 7.27429000  | 3.47083000  | #O |
| 11.09187000 | 11.73571000 | 2.03990000  | #O |
| 11.09091000 | 9.29542000  | 2.04078000  | #O |
| 9.61516000  | 7.26600000  | 0.88752000  | #O |
| 0.75178000  | 0.77274000  | 16.64832000 | #O |
| 2.18845000  | 5.27292000  | 15.47437000 | #O |
| 2.20513000  | 2.79598000  | 15.48268000 | #O |
| 0.74747000  | 0.75999000  | 14.06599000 | #O |
| 0.74121000  | 4.01869000  | 13.33959000 | #O |
| 2.22666000  | 2.07073000  | 12.08448000 | #O |
| 2.22164000  | 5.99858000  | 12.10463000 | #O |
| 0.75466000  | 4.03969000  | 10.79529000 | #O |
| 0.75097000  | 0.77437000  | 10.08009000 | #O |
| 2.21979000  | 5.28413000  | 8.78885000  | #O |
| 2.22213000  | 2.77547000  | 8.78514000  | #O |
| 0.74644000  | 0.78017000  | 7.47473000  | #O |
| 0.73821000  | 4.03395000  | 6.79250000  | #O |
| 2.21956000  | 2.08136000  | 5.48226000  | #O |
| 2.21878000  | 5.98409000  | 5.47688000  | #O |
| 0.73617000  | 4.03473000  | 4.21959000  | #O |
| 0.73861000  | 0.76798000  | 3.50118000  | #O |
| 2.21304000  | 5.24441000  | 2.05250000  | #O |
| 2.21433000  | 2.80361000  | 2.07006000  | #O |
| 0.73302000  | 0.78194000  | 0.91983000  | #O |
| 0.74871000  | 7.27070000  | 16.67438000 | #O |
| 2.23434000  | 11.73773000 | 15.53408000 | #O |
| 2.23123000  | 9.30397000  | 15.55659000 | #O |
| 0.72636000  | 7.31402000  | 14.09276000 | #O |
| 0.74556000  | 10.52366000 | 13.37081000 | #O |
| 2.22209000  | 8.58099000  | 12.08569000 | #O |
| 2.22364000  | 12.46304000 | 12.07402000 | #O |
| 0.74715000  | 10.51941000 | 10.78253000 | #O |
| 0.73920000  | 7.28074000  | 10.08562000 | #O |
| 2.21783000  | 11.77487000 | 8.77399000  | #O |
| 2.21969000  | 9.26894000  | 8.77942000  | #O |
| 0.74867000  | 7.27741000  | 7.47759000  | #O |
| 0.73795000  | 10.51771000 | 6.77575000  | #O |
| 2.21751000  | 8.57840000  | 5.46201000  | #O |
| 2.21930000  | 12.47074000 | 5.48540000  | #O |
| 0.73504000  | 10.52601000 | 4.20083000  | #O |
| 0.73496000  | 7.27215000  | 3.47907000  | #O |
| 2.21337000  | 11.73542000 | 2.04114000  | #O |
| 2.21539000  | 9.29508000  | 2.04483000  | #O |
| 0.73666000  | 7.27025000  | 0.89011000  | #O |

|             |             |             |     |
|-------------|-------------|-------------|-----|
| 3.70694000  | 4.07472000  | 15.37532000 | #Ti |
| 5.18758000  | 0.75425000  | 15.53483000 | #Ti |
| 3.70042000  | 0.79573000  | 12.19491000 | #Ti |
| 5.17721000  | 4.05811000  | 12.11221000 | #Ti |
| 3.67042000  | 4.01650000  | 8.83812000  | #Ti |
| 5.03714000  | 0.78252000  | 8.77952000  | #Ti |
| 3.69114000  | 0.80828000  | 5.37229000  | #Ti |
| 5.18064000  | 4.05179000  | 5.62365000  | #Ti |
| 3.69434000  | 4.02444000  | 2.41493000  | #Ti |
| 5.16634000  | 0.77804000  | 2.00871000  | #Ti |
| 6.65069000  | 3.94009000  | 15.26406000 | #Ti |
| 8.15587000  | 0.76553000  | 15.52047000 | #Ti |
| 6.66155000  | 0.81291000  | 12.18398000 | #Ti |
| 8.14961000  | 4.06527000  | 12.11491000 | #Ti |
| 6.62483000  | 4.03859000  | 8.90160000  | #Ti |
| 7.99411000  | 0.78226000  | 8.77629000  | #Ti |
| 6.65358000  | 0.80219000  | 5.36853000  | #Ti |
| 8.12433000  | 4.06164000  | 5.61734000  | #Ti |
| 6.65256000  | 4.02435000  | 2.41167000  | #Ti |
| 8.12531000  | 0.77802000  | 2.00668000  | #Ti |
| 9.59801000  | 4.07224000  | 15.35471000 | #Ti |
| 11.10672000 | 0.79069000  | 15.55288000 | #Ti |
| 9.62210000  | 0.80036000  | 12.18640000 | #Ti |
| 11.05402000 | 4.05292000  | 12.01754000 | #Ti |
| 9.57863000  | 4.01612000  | 8.83095000  | #Ti |
| 10.95627000 | 0.78412000  | 8.77710000  | #Ti |
| 9.60445000  | 0.80597000  | 5.36981000  | #Ti |
| 11.09335000 | 4.05093000  | 5.61413000  | #Ti |
| 9.61126000  | 4.02457000  | 2.41304000  | #Ti |
| 11.08420000 | 0.77722000  | 2.00851000  | #Ti |
| 3.70750000  | 10.51594000 | 15.18476000 | #Ti |
| 5.22167000  | 7.26905000  | 15.55101000 | #Ti |
| 3.70883000  | 7.30630000  | 12.22255000 | #Ti |
| 5.17626000  | 10.56315000 | 11.98321000 | #Ti |
| 3.64726000  | 10.54210000 | 8.78601000  | #Ti |
| 5.01747000  | 7.26763000  | 8.77179000  | #Ti |
| 3.69391000  | 7.29783000  | 5.32701000  | #Ti |
| 5.17085000  | 10.55810000 | 5.57965000  | #Ti |
| 3.69434000  | 10.51992000 | 2.38559000  | #Ti |
| 5.17064000  | 7.26633000  | 1.96811000  | #Ti |
| 6.67237000  | 10.51223000 | 15.17515000 | #Ti |
| 8.04864000  | 7.26062000  | 15.29167000 | #Ti |
| 6.66039000  | 7.30865000  | 11.94492000 | #Ti |
| 8.13649000  | 10.56505000 | 11.98118000 | #Ti |
| 6.60546000  | 10.49822000 | 8.78285000  | #Ti |
| 8.07040000  | 7.27023000  | 8.62937000  | #Ti |
| 6.64610000  | 7.29726000  | 5.32130000  | #Ti |
| 8.12976000  | 10.54527000 | 5.57676000  | #Ti |
| 6.65291000  | 10.51780000 | 2.38504000  | #Ti |
| 8.13093000  | 7.26647000  | 1.96469000  | #Ti |
| 9.62805000  | 10.50266000 | 15.17871000 | #Ti |
| 11.19790000 | 7.27520000  | 15.51676000 | #Ti |
| 9.62484000  | 7.31615000  | 12.17986000 | #Ti |
| 11.09676000 | 10.55016000 | 11.98490000 | #Ti |
| 9.56601000  | 10.54244000 | 8.78482000  | #Ti |

|             |             |             |     |
|-------------|-------------|-------------|-----|
| 10.99636000 | 7.26752000  | 8.85138000  | #Ti |
| 9.61626000  | 7.29545000  | 5.31700000  | #Ti |
| 11.08819000 | 10.56245000 | 5.58135000  | #Ti |
| 9.61221000  | 10.51958000 | 2.38507000  | #Ti |
| 11.09647000 | 7.26522000  | 1.97815000  | #Ti |
| 0.73747000  | 4.00240000  | 15.13756000 | #Ti |
| 2.23175000  | 0.79429000  | 15.55583000 | #Ti |
| 0.73916000  | 0.79938000  | 12.19551000 | #Ti |
| 2.26084000  | 4.04195000  | 12.03450000 | #Ti |
| 0.70924000  | 4.03529000  | 8.86406000  | #Ti |
| 2.07687000  | 0.78412000  | 8.78157000  | #Ti |
| 0.73617000  | 0.80681000  | 5.37137000  | #Ti |
| 2.21331000  | 4.06356000  | 5.61286000  | #Ti |
| 0.73522000  | 4.02302000  | 2.41121000  | #Ti |
| 2.20832000  | 0.77724000  | 2.00935000  | #Ti |
| 0.74828000  | 10.54307000 | 15.18641000 | #Ti |
| 2.27465000  | 7.28429000  | 15.57552000 | #Ti |
| 0.75424000  | 7.28708000  | 12.16729000 | #Ti |
| 2.21721000  | 10.55247000 | 11.98806000 | #Ti |
| 0.68987000  | 10.50315000 | 8.78403000  | #Ti |
| 2.09958000  | 7.26910000  | 8.73645000  | #Ti |
| 0.72970000  | 7.30152000  | 5.35137000  | #Ti |
| 2.21282000  | 10.55267000 | 5.57884000  | #Ti |
| 0.73540000  | 10.51679000 | 2.38730000  | #Ti |
| 2.21141000  | 7.26516000  | 1.98440000  | #Ti |

Rut-Gln-Z

|             |           |           |
|-------------|-----------|-----------|
| 1.000000000 |           |           |
| 11.834800   | 0.000000  | 0.000000  |
| 0.000000    | 12.992946 | 0.000000  |
| 0.000000    | 0.000000  | 30.000000 |

H C N O Ti

10 5 2 163 80

Cartesian

|            |            |             |    |
|------------|------------|-------------|----|
| 5.88409000 | 5.83393000 | 20.33632000 | #H |
| 5.60772000 | 5.86092000 | 18.59463000 | #H |
| 5.81840000 | 3.09855000 | 19.02490000 | #H |
| 5.08505000 | 3.64252000 | 20.54622000 | #H |
| 8.14956000 | 4.85072000 | 19.99711000 | #H |
| 8.93060000 | 6.65140000 | 18.29314000 | #H |
| 7.32949000 | 6.98115000 | 17.94024000 | #H |
| 7.99357000 | 7.23402000 | 19.58775000 | #H |
| 1.94836000 | 4.35928000 | 19.01484000 | #H |
| 2.86821000 | 4.23294000 | 20.49265000 | #H |
| 6.04619000 | 5.26525000 | 19.40739000 | #C |
| 5.26894000 | 3.92035000 | 19.49871000 | #C |
| 3.94887000 | 4.04227000 | 18.74369000 | #C |
| 7.92578000 | 4.38442000 | 17.88273000 | #C |
| 7.56622000 | 5.21026000 | 19.13596000 | #C |
| 8.00244000 | 6.60357000 | 18.78360000 | #N |
| 2.83902000 | 4.22168000 | 19.48123000 | #N |
| 3.88606000 | 4.02044000 | 17.49937000 | #O |
| 9.12986000 | 4.28048000 | 17.52075000 | #O |
| 6.90154000 | 3.97258000 | 17.25267000 | #O |

|             |            |             |    |
|-------------|------------|-------------|----|
| 3.71918000  | 0.79239000 | 16.65551000 | #O |
| 5.20200000  | 5.25899000 | 15.37884000 | #O |
| 5.16325000  | 2.75385000 | 15.35415000 | #O |
| 3.69826000  | 0.71784000 | 14.07168000 | #O |
| 3.67948000  | 4.03533000 | 13.40951000 | #O |
| 5.17904000  | 2.06303000 | 12.10469000 | #O |
| 5.18423000  | 5.98933000 | 12.11845000 | #O |
| 3.71127000  | 4.02902000 | 10.81213000 | #O |
| 3.70905000  | 0.76924000 | 10.08625000 | #O |
| 5.18462000  | 5.28242000 | 8.78853000  | #O |
| 5.17945000  | 2.77440000 | 8.79631000  | #O |
| 3.71509000  | 0.77328000 | 7.47939000  | #O |
| 3.70312000  | 4.03597000 | 6.79816000  | #O |
| 5.18291000  | 2.07942000 | 5.48765000  | #O |
| 5.18656000  | 5.98259000 | 5.47058000  | #O |
| 3.70128000  | 4.02855000 | 4.22182000  | #O |
| 3.70582000  | 0.76903000 | 3.50866000  | #O |
| 5.18181000  | 5.24714000 | 2.05075000  | #O |
| 5.18064000  | 2.80640000 | 2.07003000  | #O |
| 3.69876000  | 0.77709000 | 0.92875000  | #O |
| 6.67301000  | 0.83165000 | 16.63382000 | #O |
| 8.12857000  | 5.27484000 | 15.25559000 | #O |
| 8.20025000  | 2.74190000 | 15.28348000 | #O |
| 6.65677000  | 0.69797000 | 14.05444000 | #O |
| 6.66212000  | 4.00034000 | 13.34525000 | #O |
| 8.15189000  | 2.05864000 | 12.11151000 | #O |
| 8.14593000  | 5.99035000 | 12.11515000 | #O |
| 6.66106000  | 4.03084000 | 10.81716000 | #O |
| 6.66842000  | 0.77361000 | 10.08250000 | #O |
| 8.13779000  | 5.28620000 | 8.79177000  | #O |
| 8.13974000  | 2.77458000 | 8.78586000  | #O |
| 6.67041000  | 0.77353000 | 7.47686000  | #O |
| 6.66127000  | 4.03524000 | 6.79757000  | #O |
| 8.14097000  | 2.07845000 | 5.48807000  | #O |
| 8.14099000  | 5.98388000 | 5.46763000  | #O |
| 6.66077000  | 4.02892000 | 4.22019000  | #O |
| 6.66353000  | 0.76941000 | 3.50500000  | #O |
| 8.13779000  | 5.24739000 | 2.04941000  | #O |
| 8.13908000  | 2.80544000 | 2.06825000  | #O |
| 6.65780000  | 0.77907000 | 0.92653000  | #O |
| 9.61519000  | 0.78454000 | 16.64945000 | #O |
| 11.13218000 | 5.25290000 | 15.50582000 | #O |
| 11.11403000 | 2.79115000 | 15.51957000 | #O |
| 9.65394000  | 0.70407000 | 14.06551000 | #O |
| 9.66398000  | 4.03611000 | 13.37394000 | #O |
| 11.10714000 | 2.06491000 | 12.08386000 | #O |
| 11.11136000 | 5.99106000 | 12.09165000 | #O |
| 9.60800000  | 4.02712000 | 10.80017000 | #O |
| 9.62921000  | 0.76882000 | 10.08651000 | #O |
| 11.09164000 | 5.28293000 | 8.78577000  | #O |
| 11.09571000 | 2.77485000 | 8.79246000  | #O |
| 9.62985000  | 0.77388000 | 7.48076000  | #O |
| 9.61901000  | 4.03566000 | 6.79508000  | #O |
| 11.09934000 | 2.07938000 | 5.48854000  | #O |
| 11.09426000 | 5.98281000 | 5.47070000  | #O |

|             |             |             |    |
|-------------|-------------|-------------|----|
| 9.61860000  | 4.02600000  | 4.21801000  | #O |
| 9.62446000  | 0.76965000  | 3.50715000  | #O |
| 11.09957000 | 5.24779000  | 2.05190000  | #O |
| 11.09823000 | 2.80660000  | 2.06631000  | #O |
| 9.61679000  | 0.77651000  | 0.92745000  | #O |
| 3.74253000  | 7.21503000  | 16.70440000 | #O |
| 5.19173000  | 11.72263000 | 15.55087000 | #O |
| 5.18348000  | 9.29592000  | 15.57399000 | #O |
| 3.68534000  | 7.31352000  | 14.11829000 | #O |
| 3.71193000  | 10.50794000 | 13.37562000 | #O |
| 5.17526000  | 8.57091000  | 12.07591000 | #O |
| 5.18272000  | 12.45435000 | 12.06445000 | #O |
| 3.69894000  | 10.51008000 | 10.78732000 | #O |
| 3.70944000  | 7.26969000  | 10.05216000 | #O |
| 5.18245000  | 11.76658000 | 8.78084000  | #O |
| 5.18447000  | 9.25886000  | 8.78476000  | #O |
| 3.71366000  | 7.27412000  | 7.46984000  | #O |
| 3.70317000  | 10.50796000 | 6.77913000  | #O |
| 5.18624000  | 8.57178000  | 5.46086000  | #O |
| 5.18445000  | 12.46663000 | 5.48971000  | #O |
| 3.70150000  | 10.52103000 | 4.20418000  | #O |
| 3.70623000  | 7.27383000  | 3.46899000  | #O |
| 5.18074000  | 11.73434000 | 2.04586000  | #O |
| 5.17959000  | 9.29450000  | 2.03625000  | #O |
| 3.69670000  | 7.26489000  | 0.88137000  | #O |
| 6.70420000  | 7.21863000  | 16.69333000 | #O |
| 8.14032000  | 11.72315000 | 15.54606000 | #O |
| 8.15372000  | 9.29604000  | 15.53705000 | #O |
| 6.64936000  | 7.35919000  | 14.10168000 | #O |
| 6.66104000  | 10.50939000 | 13.36787000 | #O |
| 8.14863000  | 8.57956000  | 12.07866000 | #O |
| 8.14815000  | 12.45734000 | 12.07173000 | #O |
| 6.66373000  | 10.51274000 | 10.78800000 | #O |
| 6.68059000  | 7.27311000  | 10.09809000 | #O |
| 8.13969000  | 11.76564000 | 8.78134000  | #O |
| 8.13866000  | 9.25722000  | 8.78267000  | #O |
| 6.66489000  | 7.27328000  | 7.48365000  | #O |
| 6.66145000  | 10.50813000 | 6.77888000  | #O |
| 8.13887000  | 8.57160000  | 5.45564000  | #O |
| 8.14110000  | 12.46703000 | 5.48920000  | #O |
| 6.65953000  | 10.52327000 | 4.20080000  | #O |
| 6.66253000  | 7.27533000  | 3.45709000  | #O |
| 8.13837000  | 11.73482000 | 2.04833000  | #O |
| 8.14023000  | 9.29449000  | 2.03314000  | #O |
| 6.65517000  | 7.27069000  | 0.87242000  | #O |
| 9.57518000  | 7.22011000  | 16.66465000 | #O |
| 11.11063000 | 11.73154000 | 15.54475000 | #O |
| 11.10641000 | 9.30287000  | 15.57476000 | #O |
| 9.66269000  | 7.33220000  | 14.09690000 | #O |
| 9.62921000  | 10.51562000 | 13.37006000 | #O |
| 11.11333000 | 8.57204000  | 12.08210000 | #O |
| 11.11382000 | 12.45405000 | 12.06910000 | #O |
| 9.62539000  | 10.50961000 | 10.78797000 | #O |
| 9.60999000  | 7.27347000  | 10.09131000 | #O |
| 11.09951000 | 11.76654000 | 8.78055000  | #O |

|             |             |             |     |
|-------------|-------------|-------------|-----|
| 11.09082000 | 9.25934000  | 8.77701000  | #O  |
| 9.60991000  | 7.27294000  | 7.48378000  | #O  |
| 9.61650000  | 10.50907000 | 6.77799000  | #O  |
| 11.09582000 | 8.57136000  | 5.46362000  | #O  |
| 11.10185000 | 12.46698000 | 5.49133000  | #O  |
| 9.62018000  | 10.52219000 | 4.20145000  | #O  |
| 9.61745000  | 7.27712000  | 3.45736000  | #O  |
| 11.09863000 | 11.73454000 | 2.04554000  | #O  |
| 11.09807000 | 9.29447000  | 2.03662000  | #O  |
| 9.62227000  | 7.26286000  | 0.87262000  | #O  |
| 0.75477000  | 0.76449000  | 16.66434000 | #O  |
| 2.18878000  | 5.25706000  | 15.50198000 | #O  |
| 2.20285000  | 2.78498000  | 15.48468000 | #O  |
| 0.74271000  | 0.75393000  | 14.07786000 | #O  |
| 0.73885000  | 4.01823000  | 13.34871000 | #O  |
| 2.22788000  | 2.06286000  | 12.10022000 | #O  |
| 2.22309000  | 5.98835000  | 12.10650000 | #O  |
| 0.75481000  | 4.03012000  | 10.79900000 | #O  |
| 0.75198000  | 0.77288000  | 10.08026000 | #O  |
| 2.22292000  | 5.27986000  | 8.78623000  | #O  |
| 2.22550000  | 2.77397000  | 8.78483000  | #O  |
| 0.75464000  | 0.77459000  | 7.47551000  | #O  |
| 0.74096000  | 4.03629000  | 6.79400000  | #O  |
| 2.22449000  | 2.08073000  | 5.49027000  | #O  |
| 2.22295000  | 5.98365000  | 5.47252000  | #O  |
| 0.74334000  | 4.02934000  | 4.22033000  | #O  |
| 0.74620000  | 0.77129000  | 3.50741000  | #O  |
| 2.22091000  | 5.24607000  | 2.05444000  | #O  |
| 2.22235000  | 2.80520000  | 2.06965000  | #O  |
| 0.74119000  | 0.77828000  | 0.92780000  | #O  |
| 0.74339000  | 7.26047000  | 16.72951000 | #O  |
| 2.23120000  | 11.73122000 | 15.53672000 | #O  |
| 2.23331000  | 9.29758000  | 15.58087000 | #O  |
| 0.76796000  | 7.30003000  | 14.12756000 | #O  |
| 0.74500000  | 10.50738000 | 13.37829000 | #O  |
| 2.22359000  | 8.57311000  | 12.09537000 | #O  |
| 2.22260000  | 12.45635000 | 12.08432000 | #O  |
| 0.75037000  | 10.50852000 | 10.78720000 | #O  |
| 0.73390000  | 7.27499000  | 10.04836000 | #O  |
| 2.22197000  | 11.76618000 | 8.77852000  | #O  |
| 2.22219000  | 9.26288000  | 8.77541000  | #O  |
| 0.73600000  | 7.27139000  | 7.47293000  | #O  |
| 0.74209000  | 10.50917000 | 6.77981000  | #O  |
| 2.22284000  | 8.57103000  | 5.46212000  | #O  |
| 2.22394000  | 12.46691000 | 5.49173000  | #O  |
| 0.74250000  | 10.52211000 | 4.20450000  | #O  |
| 0.73981000  | 7.27476000  | 3.46856000  | #O  |
| 2.22099000  | 11.73418000 | 2.04985000  | #O  |
| 2.22173000  | 9.29412000  | 2.04219000  | #O  |
| 0.74688000  | 7.26891000  | 0.88146000  | #O  |
| 3.70188000  | 4.06233000  | 15.36098000 | #Ti |
| 5.18780000  | 0.74094000  | 15.54447000 | #Ti |
| 3.68898000  | 0.78280000  | 12.20858000 | #Ti |
| 5.17750000  | 4.02673000  | 12.11231000 | #Ti |
| 3.68430000  | 4.02184000  | 8.84320000  | #Ti |



|             |             |             |     |
|-------------|-------------|-------------|-----|
| 5.04037000  | 0.77780000  | 8.79531000  | #Ti |
| 3.70103000  | 0.80919000  | 5.38260000  | #Ti |
| 5.18669000  | 4.06000000  | 5.62266000  | #Ti |
| 3.70162000  | 4.02493000  | 2.41681000  | #Ti |
| 5.17489000  | 0.77704000  | 2.01703000  | #Ti |
| 6.64541000  | 3.92766000  | 15.26516000 | #Ti |
| 8.15490000  | 0.75341000  | 15.53752000 | #Ti |
| 6.67399000  | 0.79933000  | 12.19575000 | #Ti |
| 8.14439000  | 4.08613000  | 12.11200000 | #Ti |
| 6.63907000  | 4.02142000  | 8.90099000  | #Ti |
| 8.00004000  | 0.77744000  | 8.77558000  | #Ti |
| 6.65560000  | 0.80333000  | 5.37763000  | #Ti |
| 8.13128000  | 4.05600000  | 5.62098000  | #Ti |
| 6.65990000  | 4.02351000  | 2.41251000  | #Ti |
| 8.13343000  | 0.77734000  | 2.01692000  | #Ti |
| 9.59467000  | 4.05692000  | 15.32557000 | #Ti |
| 11.10923000 | 0.78373000  | 15.56775000 | #Ti |
| 9.61068000  | 0.79013000  | 12.20575000 | #Ti |
| 11.06348000 | 4.02038000  | 12.02093000 | #Ti |
| 9.59440000  | 4.02436000  | 8.83730000  | #Ti |
| 10.95838000 | 0.77905000  | 8.79661000  | #Ti |
| 9.61327000  | 0.80562000  | 5.38144000  | #Ti |
| 11.09789000 | 4.06224000  | 5.61181000  | #Ti |
| 9.61825000  | 4.02530000  | 2.41305000  | #Ti |
| 11.09229000 | 0.77719000  | 2.01771000  | #Ti |
| 3.70574000  | 10.51305000 | 15.19275000 | #Ti |
| 5.25670000  | 7.25798000  | 15.59639000 | #Ti |
| 3.71599000  | 7.28946000  | 12.30901000 | #Ti |
| 5.17908000  | 10.56444000 | 11.98999000 | #Ti |
| 3.66252000  | 10.51799000 | 8.79215000  | #Ti |
| 5.09516000  | 7.26546000  | 8.68830000  | #Ti |
| 3.69652000  | 7.29887000  | 5.33547000  | #Ti |
| 5.17855000  | 10.55253000 | 5.58407000  | #Ti |
| 3.70072000  | 10.51830000 | 2.39110000  | #Ti |
| 5.17239000  | 7.26662000  | 1.96524000  | #Ti |
| 6.67074000  | 10.48302000 | 15.18212000 | #Ti |
| 8.17963000  | 7.26227000  | 15.21217000 | #Ti |
| 6.64159000  | 7.30299000  | 11.96544000 | #Ti |
| 8.14096000  | 10.52708000 | 11.99477000 | #Ti |
| 6.62184000  | 10.51745000 | 8.79379000  | #Ti |
| 8.12313000  | 7.26561000  | 8.65903000  | #Ti |
| 6.65869000  | 7.29701000  | 5.30030000  | #Ti |
| 8.13625000  | 10.55305000 | 5.58284000  | #Ti |
| 6.65942000  | 10.51694000 | 2.38794000  | #Ti |
| 8.13747000  | 7.26720000  | 1.94870000  | #Ti |
| 9.63039000  | 10.51659000 | 15.18622000 | #Ti |
| 11.05229000 | 7.26545000  | 15.63849000 | #Ti |
| 9.65203000  | 7.30111000  | 11.94347000 | #Ti |
| 11.10158000 | 10.56065000 | 11.99451000 | #Ti |
| 9.58188000  | 10.51493000 | 8.79513000  | #Ti |
| 11.16048000 | 7.26383000  | 8.67169000  | #Ti |
| 9.61841000  | 7.29740000  | 5.30046000  | #Ti |
| 11.09425000 | 10.55345000 | 5.58538000  | #Ti |
| 9.61870000  | 10.51878000 | 2.38839000  | #Ti |
| 11.10341000 | 7.26659000  | 1.96387000  | #Ti |

|            |             |             |     |
|------------|-------------|-------------|-----|
| 0.73294000 | 4.00237000  | 15.15185000 | #Ti |
| 2.23200000 | 0.78309000  | 15.56784000 | #Ti |
| 0.75741000 | 0.78872000  | 12.21003000 | #Ti |
| 2.25632000 | 4.06585000  | 12.03934000 | #Ti |
| 0.72355000 | 4.01864000  | 8.86182000  | #Ti |
| 2.08147000 | 0.77818000  | 8.78092000  | #Ti |
| 0.73349000 | 0.80849000  | 5.38148000  | #Ti |
| 2.21991000 | 4.05383000  | 5.61732000  | #Ti |
| 0.74257000 | 4.02280000  | 2.41219000  | #Ti |
| 2.21575000 | 0.77733000  | 2.01896000  | #Ti |
| 0.74771000 | 10.51597000 | 15.19705000 | #Ti |
| 2.22964000 | 7.27262000  | 15.66469000 | #Ti |
| 0.73317000 | 7.28069000  | 12.31774000 | #Ti |
| 2.22109000 | 10.50721000 | 11.99675000 | #Ti |
| 0.70500000 | 10.51922000 | 8.79266000  | #Ti |
| 2.20854000 | 7.26510000  | 8.91042000  | #Ti |
| 0.74907000 | 7.30196000  | 5.33155000  | #Ti |
| 2.21895000 | 10.56541000 | 5.58528000  | #Ti |
| 0.74219000 | 10.51690000 | 2.39119000  | #Ti |
| 2.22137000 | 7.26605000  | 1.98002000  | #Ti |

Rut-Gln-C

1.000000000

11.834800 0.000000 0.000000

0.000000 12.992946 0.000000

0.000000 0.000000 30.000000

H C N O Ti

10 5 2 163 80

Cartesian

|             |            |             |    |
|-------------|------------|-------------|----|
| 5.81038000  | 5.65478000 | 17.28199000 | #H |
| 5.91548000  | 5.63650000 | 19.03185000 | #H |
| 6.98999000  | 3.41301000 | 19.04315000 | #H |
| 6.74952000  | 3.16800000 | 17.33241000 | #H |
| 2.73096000  | 3.55027000 | 17.47013000 | #H |
| 4.10651000  | 2.76242000 | 17.23238000 | #H |
| 3.71869000  | 5.48606000 | 18.29833000 | #H |
| 2.88972000  | 2.83228000 | 20.68161000 | #H |
| 9.21927000  | 6.38846000 | 17.84822000 | #H |
| 7.74368000  | 6.33073000 | 18.77054000 | #H |
| 5.75527000  | 4.99552000 | 18.15176000 | #C |
| 6.89913000  | 3.95693000 | 18.08774000 | #C |
| 8.24455000  | 4.61924000 | 17.79898000 | #C |
| 4.29503000  | 4.54310000 | 18.31199000 | #C |
| 4.06509000  | 3.95998000 | 19.71414000 | #C |
| 3.71249000  | 3.71305000 | 17.22435000 | #N |
| 8.48348000  | 5.82348000 | 18.29700000 | #N |
| 9.14350000  | 4.05577000 | 17.08613000 | #O |
| 4.72979000  | 4.24146000 | 20.69356000 | #O |
| 2.98753000  | 3.12502000 | 19.75123000 | #O |
| 9.47920000  | 0.88502000 | 16.23740000 | #O |
| 10.97598000 | 5.33698000 | 15.10358000 | #O |
| 10.98773000 | 2.87756000 | 15.12070000 | #O |
| 9.50618000  | 0.81619000 | 13.66737000 | #O |
| 9.49426000  | 4.11012000 | 13.01282000 | #O |
| 10.97833000 | 2.15117000 | 11.70831000 | #O |

|             |            |             |    |
|-------------|------------|-------------|----|
| 10.97982000 | 6.06694000 | 11.69896000 | #O |
| 9.50269000  | 4.10598000 | 10.41291000 | #O |
| 9.50163000  | 0.86406000 | 9.69426000  | #O |
| 10.96728000 | 5.36386000 | 8.39853000  | #O |
| 10.96843000 | 2.85668000 | 8.39452000  | #O |
| 9.49717000  | 0.85844000 | 7.08503000  | #O |
| 9.49130000  | 4.10555000 | 6.40024000  | #O |
| 10.97347000 | 2.15185000 | 5.09167000  | #O |
| 10.97140000 | 6.05265000 | 5.08880000  | #O |
| 9.49482000  | 4.10565000 | 3.82381000  | #O |
| 9.49575000  | 0.84920000 | 3.10050000  | #O |
| 10.97403000 | 5.32056000 | 1.66272000  | #O |
| 10.97363000 | 2.88069000 | 1.66896000  | #O |
| 9.49564000  | 0.85923000 | 0.51836000  | #O |
| 0.62660000  | 0.85868000 | 16.25521000 | #O |
| 2.08476000  | 5.32834000 | 15.15435000 | #O |
| 2.06684000  | 2.87193000 | 15.07851000 | #O |
| 0.61504000  | 0.83614000 | 13.67766000 | #O |
| 0.62042000  | 4.12386000 | 12.97720000 | #O |
| 2.09376000  | 2.15081000 | 11.69985000 | #O |
| 2.09621000  | 6.06622000 | 11.69277000 | #O |
| 0.60955000  | 4.10801000 | 10.42301000 | #O |
| 0.62447000  | 0.86011000 | 9.69227000  | #O |
| 2.09338000  | 5.36364000 | 8.39104000  | #O |
| 2.09256000  | 2.85653000 | 8.39065000  | #O |
| 0.62084000  | 0.86039000 | 7.08223000  | #O |
| 0.61683000  | 4.10645000 | 6.40077000  | #O |
| 2.09868000  | 2.15147000 | 5.08904000  | #O |
| 2.09837000  | 6.05233000 | 5.08648000  | #O |
| 0.61686000  | 4.10218000 | 3.82442000  | #O |
| 0.61775000  | 0.85169000 | 3.10088000  | #O |
| 2.09521000  | 5.32340000 | 1.66601000  | #O |
| 2.09595000  | 2.88338000 | 1.66512000  | #O |
| 0.61763000  | 0.85872000 | 0.51823000  | #O |
| 3.59781000  | 0.91562000 | 16.23347000 | #O |
| 5.06812000  | 5.34177000 | 15.07281000 | #O |
| 5.09572000  | 2.86094000 | 14.98019000 | #O |
| 3.57160000  | 0.81334000 | 13.65701000 | #O |
| 3.57303000  | 4.11440000 | 12.98503000 | #O |
| 5.05854000  | 2.14910000 | 11.69341000 | #O |
| 5.05176000  | 6.06640000 | 11.67312000 | #O |
| 3.55894000  | 4.10535000 | 10.39321000 | #O |
| 3.58129000  | 0.86352000 | 9.69066000  | #O |
| 5.05003000  | 5.36417000 | 8.39710000  | #O |
| 5.04991000  | 2.85564000 | 8.38887000  | #O |
| 3.58206000  | 0.85891000 | 7.08001000  | #O |
| 3.57691000  | 4.10518000 | 6.39314000  | #O |
| 5.05704000  | 2.15234000 | 5.08387000  | #O |
| 5.05581000  | 6.05209000 | 5.08307000  | #O |
| 3.57519000  | 4.10637000 | 3.81970000  | #O |
| 3.57918000  | 0.84976000 | 3.09795000  | #O |
| 5.05674000  | 5.32107000 | 1.65879000  | #O |
| 5.05652000  | 2.88088000 | 1.66634000  | #O |
| 3.57579000  | 0.85895000 | 0.51652000  | #O |
| 9.48507000  | 7.34982000 | 16.23338000 | #O |

|             |             |             |    |
|-------------|-------------|-------------|----|
| 10.97527000 | 11.81739000 | 15.14763000 | #O |
| 10.97642000 | 9.38499000  | 15.11886000 | #O |
| 9.50602000  | 7.38384000  | 13.65916000 | #O |
| 9.49617000  | 10.61123000 | 12.96299000 | #O |
| 10.98145000 | 8.66476000  | 11.68426000 | #O |
| 10.97803000 | 12.54598000 | 11.67825000 | #O |
| 9.49589000  | 10.60271000 | 10.38393000 | #O |
| 9.50605000  | 7.36421000  | 9.69539000  | #O |
| 10.96979000 | 11.85922000 | 8.38582000  | #O |
| 10.97182000 | 9.35230000  | 8.37984000  | #O |
| 9.49300000  | 7.35862000  | 7.08902000  | #O |
| 9.49217000  | 10.60151000 | 6.37909000  | #O |
| 10.97377000 | 8.65187000  | 5.08529000  | #O |
| 10.97394000 | 12.54460000 | 5.08445000  | #O |
| 9.49456000  | 10.60200000 | 3.80553000  | #O |
| 9.49522000  | 7.35266000  | 3.09743000  | #O |
| 10.97298000 | 11.81703000 | 1.64585000  | #O |
| 10.97250000 | 9.37792000  | 1.64850000  | #O |
| 9.49579000  | 7.34826000  | 0.51418000  | #O |
| 0.61228000  | 7.35881000  | 16.25284000 | #O |
| 2.09973000  | 11.82356000 | 15.13745000 | #O |
| 2.10214000  | 9.38685000  | 15.13280000 | #O |
| 0.62850000  | 7.36279000  | 13.67791000 | #O |
| 0.61878000  | 10.61000000 | 12.96888000 | #O |
| 2.09966000  | 8.66283000  | 11.68631000 | #O |
| 2.09211000  | 12.54526000 | 11.67643000 | #O |
| 0.61795000  | 10.60223000 | 10.38471000 | #O |
| 0.62586000  | 7.36245000  | 9.69384000  | #O |
| 2.09445000  | 11.85893000 | 8.38016000  | #O |
| 2.09376000  | 9.35247000  | 8.38035000  | #O |
| 0.61910000  | 7.35681000  | 7.08448000  | #O |
| 0.61704000  | 10.60196000 | 6.37923000  | #O |
| 2.09697000  | 8.65147000  | 5.08432000  | #O |
| 2.09789000  | 12.54452000 | 5.08249000  | #O |
| 0.61734000  | 10.59842000 | 3.80541000  | #O |
| 0.61646000  | 7.35204000  | 3.09928000  | #O |
| 2.09640000  | 11.81881000 | 1.65135000  | #O |
| 2.09673000  | 9.37858000  | 1.65170000  | #O |
| 0.61775000  | 7.34946000  | 0.51569000  | #O |
| 3.59496000  | 7.33515000  | 16.24291000 | #O |
| 5.05645000  | 11.81885000 | 15.14823000 | #O |
| 5.05517000  | 9.39239000  | 15.11677000 | #O |
| 3.57551000  | 7.37237000  | 13.66801000 | #O |
| 3.57889000  | 10.61404000 | 12.96420000 | #O |
| 5.05508000  | 8.66151000  | 11.67685000 | #O |
| 5.04969000  | 12.54180000 | 11.65729000 | #O |
| 3.56993000  | 10.60181000 | 10.38325000 | #O |
| 3.58229000  | 7.36378000  | 9.69179000  | #O |
| 5.05213000  | 11.85883000 | 8.38601000  | #O |
| 5.05419000  | 9.35129000  | 8.37971000  | #O |
| 3.58153000  | 7.35727000  | 7.08128000  | #O |
| 3.57563000  | 10.60168000 | 6.37853000  | #O |
| 5.05827000  | 8.65162000  | 5.08280000  | #O |
| 5.05683000  | 12.54429000 | 5.08232000  | #O |
| 3.57703000  | 10.60091000 | 3.80470000  | #O |

|             |             |             |     |
|-------------|-------------|-------------|-----|
| 3.57972000  | 7.35344000  | 3.09592000  | #O  |
| 5.05549000  | 11.81699000 | 1.64348000  | #O  |
| 5.05512000  | 9.37811000  | 1.64614000  | #O  |
| 3.57487000  | 7.34695000  | 0.51382000  | #O  |
| 6.53085000  | 0.90267000  | 16.22602000 | #O  |
| 7.97603000  | 5.34937000  | 15.04028000 | #O  |
| 7.95972000  | 2.84908000  | 14.94125000 | #O  |
| 6.52847000  | 0.77256000  | 13.64394000 | #O  |
| 6.52154000  | 4.15285000  | 12.90415000 | #O  |
| 8.00972000  | 2.14977000  | 11.70580000 | #O  |
| 8.02200000  | 6.06684000  | 11.68263000 | #O  |
| 6.53820000  | 4.10239000  | 10.39622000 | #O  |
| 6.54481000  | 0.85847000  | 9.69008000  | #O  |
| 8.01385000  | 5.36385000  | 8.39270000  | #O  |
| 8.01487000  | 2.85587000  | 8.39301000  | #O  |
| 6.53634000  | 0.86075000  | 7.08241000  | #O  |
| 6.53222000  | 4.10507000  | 6.39397000  | #O  |
| 8.01430000  | 2.15153000  | 5.08904000  | #O  |
| 8.01529000  | 6.05218000  | 5.08660000  | #O  |
| 6.53652000  | 4.10296000  | 3.81957000  | #O  |
| 6.53565000  | 0.84777000  | 3.09773000  | #O  |
| 8.01436000  | 5.32336000  | 1.66452000  | #O  |
| 8.01425000  | 2.88307000  | 1.66492000  | #O  |
| 6.53563000  | 0.85899000  | 0.51575000  | #O  |
| 6.54015000  | 7.37367000  | 16.21239000 | #O  |
| 8.01644000  | 11.81663000 | 15.13879000 | #O  |
| 8.01479000  | 9.38807000  | 15.10849000 | #O  |
| 6.53532000  | 7.38121000  | 13.64441000 | #O  |
| 6.53305000  | 10.61495000 | 12.95923000 | #O  |
| 8.01892000  | 8.66426000  | 11.67898000 | #O  |
| 8.02318000  | 12.54416000 | 11.66492000 | #O  |
| 6.53506000  | 10.59935000 | 10.38212000 | #O  |
| 6.54886000  | 7.36462000  | 9.69377000  | #O  |
| 8.01228000  | 11.85846000 | 8.38157000  | #O  |
| 8.01194000  | 9.35197000  | 8.38054000  | #O  |
| 6.53550000  | 7.35499000  | 7.08376000  | #O  |
| 6.53402000  | 10.60198000 | 6.37876000  | #O  |
| 8.01359000  | 8.65162000  | 5.08317000  | #O  |
| 8.01505000  | 12.54454000 | 5.08401000  | #O  |
| 6.53540000  | 10.59947000 | 3.80379000  | #O  |
| 6.53476000  | 7.35230000  | 3.09539000  | #O  |
| 8.01411000  | 11.81811000 | 1.64865000  | #O  |
| 8.01467000  | 9.37784000  | 1.65257000  | #O  |
| 6.53510000  | 7.34945000  | 0.51330000  | #O  |
| 9.47858000  | 4.06649000  | 15.05205000 | #Ti |
| 10.97761000 | 0.84107000  | 15.16661000 | #Ti |
| 9.49198000  | 0.82663000  | 11.79519000 | #Ti |
| 10.91353000 | 4.08748000  | 11.70207000 | #Ti |
| 9.44926000  | 4.10907000  | 8.41385000  | #Ti |
| 10.82719000 | 0.86509000  | 8.38911000  | #Ti |
| 9.49007000  | 0.83021000  | 4.96678000  | #Ti |
| 10.97731000 | 4.06894000  | 5.22200000  | #Ti |
| 9.49453000  | 4.10223000  | 2.01696000  | #Ti |
| 10.97414000 | 0.85677000  | 1.60713000  | #Ti |
| 0.61618000  | 4.11933000  | 14.77813000 | #Ti |

|             |             |             |     |
|-------------|-------------|-------------|-----|
| 2.09778000  | 0.86899000  | 15.14690000 | #Ti |
| 0.60896000  | 0.84820000  | 11.79786000 | #Ti |
| 2.11066000  | 4.07179000  | 11.64077000 | #Ti |
| 0.56892000  | 4.10980000  | 8.49829000  | #Ti |
| 1.94760000  | 0.86529000  | 8.38279000  | #Ti |
| 0.61266000  | 0.82614000  | 4.97014000  | #Ti |
| 2.08020000  | 4.06683000  | 5.21268000  | #Ti |
| 0.61716000  | 4.10133000  | 2.01186000  | #Ti |
| 2.09618000  | 0.85824000  | 1.60549000  | #Ti |
| 3.60082000  | 4.11911000  | 14.93572000 | #Ti |
| 5.06782000  | 0.84697000  | 15.10059000 | #Ti |
| 3.56683000  | 0.81059000  | 11.77743000 | #Ti |
| 5.01196000  | 4.05061000  | 11.61057000 | #Ti |
| 3.52554000  | 4.11026000  | 8.39157000  | #Ti |
| 4.90854000  | 0.86572000  | 8.37598000  | #Ti |
| 3.57150000  | 0.82703000  | 4.96479000  | #Ti |
| 5.05801000  | 4.06478000  | 5.20304000  | #Ti |
| 3.57634000  | 4.10328000  | 2.01303000  | #Ti |
| 5.05475000  | 0.85721000  | 1.60195000  | #Ti |
| 9.49758000  | 10.59458000 | 14.77298000 | #Ti |
| 10.97554000 | 7.34784000  | 15.14063000 | #Ti |
| 9.48984000  | 7.34128000  | 11.77721000 | #Ti |
| 10.96924000 | 10.58103000 | 11.58177000 | #Ti |
| 9.43506000  | 10.60655000 | 8.38218000  | #Ti |
| 10.83284000 | 7.35390000  | 8.38658000  | #Ti |
| 9.48961000  | 7.32042000  | 4.95971000  | #Ti |
| 10.96765000 | 10.56643000 | 5.18196000  | #Ti |
| 9.49383000  | 10.59912000 | 1.99032000  | #Ti |
| 10.97450000 | 7.34709000  | 1.60284000  | #Ti |
| 0.61994000  | 10.60432000 | 14.78081000 | #Ti |
| 2.09649000  | 7.36266000  | 15.16385000 | #Ti |
| 0.61325000  | 7.33247000  | 11.79444000 | #Ti |
| 2.09006000  | 10.57324000 | 11.58414000 | #Ti |
| 0.55840000  | 10.60662000 | 8.38145000  | #Ti |
| 1.94939000  | 7.35491000  | 8.38245000  | #Ti |
| 0.61267000  | 7.32280000  | 4.96684000  | #Ti |
| 2.09193000  | 10.56486000 | 5.18099000  | #Ti |
| 0.61724000  | 10.59829000 | 1.99056000  | #Ti |
| 2.09632000  | 7.34720000  | 1.60340000  | #Ti |
| 3.57271000  | 10.61805000 | 14.77541000 | #Ti |
| 5.04848000  | 7.38824000  | 15.10046000 | #Ti |
| 3.56885000  | 7.32533000  | 11.77654000 | #Ti |
| 5.04888000  | 10.55752000 | 11.57716000 | #Ti |
| 3.51620000  | 10.60719000 | 8.38208000  | #Ti |
| 4.90749000  | 7.35397000  | 8.37387000  | #Ti |
| 3.57164000  | 7.31787000  | 4.96167000  | #Ti |
| 5.05017000  | 10.56324000 | 5.18030000  | #Ti |
| 3.57618000  | 10.59973000 | 1.98951000  | #Ti |
| 5.05386000  | 7.34794000  | 1.59877000  | #Ti |
| 6.53739000  | 4.11100000  | 14.69152000 | #Ti |
| 8.01526000  | 0.84354000  | 15.12821000 | #Ti |
| 6.53158000  | 0.81312000  | 11.76268000 | #Ti |
| 8.04511000  | 4.06325000  | 11.63878000 | #Ti |
| 6.48784000  | 4.10942000  | 8.45803000  | #Ti |
| 7.87225000  | 0.86428000  | 8.37263000  | #Ti |

|            |             |             |     |
|------------|-------------|-------------|-----|
| 6.53087000 | 0.82263000  | 4.96198000  | #Ti |
| 8.00606000 | 4.06729000  | 5.21019000  | #Ti |
| 6.53547000 | 4.10190000  | 2.00702000  | #Ti |
| 8.01483000 | 0.85749000  | 1.60221000  | #Ti |
| 6.53821000 | 10.61163000 | 14.76919000 | #Ti |
| 7.99514000 | 7.35820000  | 15.08385000 | #Ti |
| 6.52883000 | 7.30489000  | 11.73339000 | #Ti |
| 8.00864000 | 10.56514000 | 11.57844000 | #Ti |
| 6.47506000 | 10.60615000 | 8.37988000  | #Ti |
| 7.87824000 | 7.35434000  | 8.35967000  | #Ti |
| 6.53016000 | 7.32092000  | 4.95596000  | #Ti |
| 8.00923000 | 10.56497000 | 5.18045000  | #Ti |
| 6.53495000 | 10.59855000 | 1.98893000  | #Ti |
| 8.01490000 | 7.34692000  | 1.59760000  | #Ti |

Rut-Arg-D

1.000000000

11.834800 0.000000 0.000000

0.000000 12.992946 0.000000

0.000000 0.000000 30.000000

H C N O Ti

14 6 4 162 80

Cartesian

|            |            |             |    |
|------------|------------|-------------|----|
| 7.36612000 | 3.72020000 | 20.60434000 | #H |
| 7.53141000 | 5.32491000 | 21.27956000 | #H |
| 5.29871000 | 5.72049000 | 20.86335000 | #H |
| 5.58089000 | 5.58279000 | 19.13612000 | #H |
| 5.42921000 | 3.02904000 | 19.38752000 | #H |
| 5.03544000 | 3.26893000 | 21.09218000 | #H |
| 2.87980000 | 3.57564000 | 20.53372000 | #H |
| 1.28995000 | 2.90020000 | 19.10280000 | #H |
| 1.57244000 | 2.89140000 | 17.44385000 | #H |
| 4.77040000 | 4.27629000 | 17.75978000 | #H |
| 9.24326000 | 4.88338000 | 19.66508000 | #H |
| 9.29117000 | 7.00079000 | 17.58411000 | #H |
| 7.44621000 | 6.92135000 | 18.50182000 | #H |
| 8.51385000 | 7.15712000 | 19.76258000 | #H |
| 7.21961000 | 4.78884000 | 20.36877000 | #C |
| 5.72210000 | 5.05952000 | 20.09343000 | #C |
| 4.95322000 | 3.72881000 | 20.09637000 | #C |
| 3.05760000 | 3.71882000 | 18.51224000 | #C |
| 8.14064000 | 4.44337000 | 17.92617000 | #C |
| 8.24872000 | 5.15847000 | 19.28453000 | #C |
| 3.52488000 | 3.80491000 | 19.78883000 | #N |
| 1.74888000 | 3.36920000 | 18.32945000 | #N |
| 3.82913000 | 3.99409000 | 17.48280000 | #N |
| 8.32079000 | 6.59364000 | 18.93332000 | #N |
| 9.25397000 | 4.20167000 | 17.35676000 | #O |
| 6.99030000 | 4.24315000 | 17.40602000 | #O |
| 3.67595000 | 0.84040000 | 16.60287000 | #O |
| 5.15381000 | 5.29297000 | 15.40928000 | #O |
| 5.19201000 | 2.79993000 | 15.37043000 | #O |
| 3.66606000 | 0.76816000 | 14.02965000 | #O |
| 3.65249000 | 4.03156000 | 13.35905000 | #O |

|             |            |             |    |
|-------------|------------|-------------|----|
| 5.16282000  | 2.07527000 | 12.07467000 | #O |
| 5.15483000  | 6.01217000 | 12.09447000 | #O |
| 3.69817000  | 4.04882000 | 10.78493000 | #O |
| 3.68634000  | 0.77451000 | 10.05966000 | #O |
| 5.15854000  | 5.28762000 | 8.76131000  | #O |
| 5.15274000  | 2.77669000 | 8.77405000  | #O |
| 3.68428000  | 0.77432000 | 7.44980000  | #O |
| 3.67379000  | 4.02710000 | 6.77519000  | #O |
| 5.15672000  | 2.07512000 | 5.45631000  | #O |
| 5.15483000  | 5.98175000 | 5.45410000  | #O |
| 3.67690000  | 4.02815000 | 4.19802000  | #O |
| 3.67810000  | 0.76616000 | 3.47266000  | #O |
| 5.15814000  | 5.24070000 | 2.03151000  | #O |
| 5.15657000  | 2.79936000 | 2.04683000  | #O |
| 3.67742000  | 0.77538000 | 0.89074000  | #O |
| 6.64029000  | 0.83370000 | 16.60848000 | #O |
| 8.13332000  | 5.32561000 | 15.21049000 | #O |
| 8.12038000  | 2.78816000 | 15.30917000 | #O |
| 6.63684000  | 0.72068000 | 14.03157000 | #O |
| 6.63051000  | 4.04456000 | 13.36242000 | #O |
| 8.11366000  | 2.07572000 | 12.07645000 | #O |
| 8.11704000  | 6.01108000 | 12.09419000 | #O |
| 6.63450000  | 4.04556000 | 10.80700000 | #O |
| 6.64208000  | 0.77246000 | 10.06085000 | #O |
| 8.10611000  | 5.28925000 | 8.76404000  | #O |
| 8.11174000  | 2.77589000 | 8.77006000  | #O |
| 6.63947000  | 0.78240000 | 7.45509000  | #O |
| 6.63478000  | 4.02930000 | 6.77562000  | #O |
| 8.11563000  | 2.07405000 | 5.45561000  | #O |
| 8.11421000  | 5.97969000 | 5.45368000  | #O |
| 6.63350000  | 4.02810000 | 4.19935000  | #O |
| 6.63595000  | 0.76305000 | 3.47305000  | #O |
| 8.11250000  | 5.23973000 | 2.02791000  | #O |
| 8.11481000  | 2.79918000 | 2.04732000  | #O |
| 6.63589000  | 0.78023000 | 0.89269000  | #O |
| 9.59559000  | 0.83477000 | 16.61229000 | #O |
| 11.09015000 | 5.31222000 | 15.41163000 | #O |
| 11.10585000 | 2.83584000 | 15.46923000 | #O |
| 9.61689000  | 0.75393000 | 14.03469000 | #O |
| 9.62725000  | 4.02310000 | 13.33663000 | #O |
| 11.07849000 | 2.07824000 | 12.03863000 | #O |
| 11.07762000 | 6.00712000 | 12.07601000 | #O |
| 9.56553000  | 4.04998000 | 10.77385000 | #O |
| 9.59930000  | 0.77390000 | 10.05482000 | #O |
| 11.06714000 | 5.28467000 | 8.75832000  | #O |
| 11.06562000 | 2.77562000 | 8.77120000  | #O |
| 9.60135000  | 0.77366000 | 7.44739000  | #O |
| 9.59197000  | 4.02582000 | 6.77285000  | #O |
| 11.07415000 | 2.07632000 | 5.45554000  | #O |
| 11.06964000 | 5.98125000 | 5.46018000  | #O |
| 9.59459000  | 4.02959000 | 4.19643000  | #O |
| 9.59712000  | 0.76611000 | 3.47301000  | #O |
| 11.07523000 | 5.23929000 | 2.02745000  | #O |
| 11.07380000 | 2.79892000 | 2.04544000  | #O |
| 9.59404000  | 0.77474000 | 0.89089000  | #O |



|             |             |             |    |
|-------------|-------------|-------------|----|
| 3.69355000  | 7.27504000  | 16.65612000 | #O |
| 5.15038000  | 11.76170000 | 15.50431000 | #O |
| 5.15989000  | 9.33206000  | 15.54121000 | #O |
| 3.65294000  | 7.34720000  | 14.07347000 | #O |
| 3.67868000  | 10.52132000 | 13.34504000 | #O |
| 5.15229000  | 8.59263000  | 12.03622000 | #O |
| 5.14988000  | 12.47250000 | 12.04616000 | #O |
| 3.67301000  | 10.53377000 | 10.76023000 | #O |
| 3.68692000  | 7.27539000  | 10.05218000 | #O |
| 5.15805000  | 11.77100000 | 8.75231000  | #O |
| 5.15427000  | 9.26262000  | 8.75963000  | #O |
| 3.66465000  | 7.27859000  | 7.45071000  | #O |
| 3.67491000  | 10.51206000 | 6.75257000  | #O |
| 5.15387000  | 8.57311000  | 5.43658000  | #O |
| 5.15848000  | 12.46437000 | 5.45867000  | #O |
| 3.67684000  | 10.52214000 | 4.17470000  | #O |
| 3.67608000  | 7.26973000  | 3.45025000  | #O |
| 5.15706000  | 11.73134000 | 2.01446000  | #O |
| 5.15478000  | 9.29116000  | 2.01237000  | #O |
| 3.67232000  | 7.25951000  | 0.86849000  | #O |
| 6.68597000  | 7.25218000  | 16.58901000 | #O |
| 8.11947000  | 11.75659000 | 15.51844000 | #O |
| 8.11345000  | 9.32860000  | 15.48828000 | #O |
| 6.60412000  | 7.37924000  | 14.04344000 | #O |
| 6.63443000  | 10.53852000 | 13.33742000 | #O |
| 8.11314000  | 8.59503000  | 12.03363000 | #O |
| 8.12260000  | 12.47325000 | 12.04450000 | #O |
| 6.63289000  | 10.53229000 | 10.75848000 | #O |
| 6.64255000  | 7.27496000  | 10.05887000 | #O |
| 8.11031000  | 11.77354000 | 8.75202000  | #O |
| 8.11402000  | 9.26360000  | 8.76514000  | #O |
| 6.63685000  | 7.28670000  | 7.44211000  | #O |
| 6.63493000  | 10.51162000 | 6.75056000  | #O |
| 8.11643000  | 8.57275000  | 5.43824000  | #O |
| 8.11452000  | 12.46446000 | 5.45582000  | #O |
| 6.63354000  | 10.51854000 | 4.17359000  | #O |
| 6.63659000  | 7.27202000  | 3.44539000  | #O |
| 8.11414000  | 11.73173000 | 2.01586000  | #O |
| 8.11547000  | 9.29141000  | 2.01294000  | #O |
| 6.63345000  | 7.26746000  | 0.85910000  | #O |
| 9.56669000  | 7.26891000  | 16.63761000 | #O |
| 11.07801000 | 11.76763000 | 15.50337000 | #O |
| 11.07625000 | 9.33432000  | 15.53332000 | #O |
| 9.61284000  | 7.38755000  | 14.04295000 | #O |
| 9.59612000  | 10.52905000 | 13.33839000 | #O |
| 11.08368000 | 8.59680000  | 12.04047000 | #O |
| 11.07979000 | 12.47479000 | 12.04641000 | #O |
| 9.59521000  | 10.53381000 | 10.75752000 | #O |
| 9.60925000  | 7.27668000  | 10.07328000 | #O |
| 11.07361000 | 11.77149000 | 8.75078000  | #O |
| 11.06912000 | 9.26530000  | 8.76023000  | #O |
| 9.58666000  | 7.27817000  | 7.47279000  | #O |
| 9.58984000  | 10.51147000 | 6.75208000  | #O |
| 11.06809000 | 8.57125000  | 5.44469000  | #O |
| 11.07634000 | 12.46414000 | 5.45905000  | #O |

|             |             |             |     |
|-------------|-------------|-------------|-----|
| 9.59571000  | 10.52121000 | 4.17373000  | #O  |
| 9.59111000  | 7.26922000  | 3.44887000  | #O  |
| 11.07462000 | 11.73130000 | 2.01483000  | #O  |
| 11.07373000 | 9.29109000  | 2.01604000  | #O  |
| 9.59765000  | 7.26104000  | 0.86674000  | #O  |
| 0.73086000  | 0.82253000  | 16.62133000 | #O  |
| 2.17210000  | 5.29934000  | 15.43151000 | #O  |
| 2.14870000  | 2.82194000  | 15.46226000 | #O  |
| 0.72047000  | 0.77475000  | 14.03409000 | #O  |
| 0.71492000  | 4.03504000  | 13.30120000 | #O  |
| 2.19485000  | 2.08076000  | 12.04420000 | #O  |
| 2.19408000  | 6.01001000  | 12.08031000 | #O  |
| 0.72086000  | 4.05002000  | 10.76752000 | #O  |
| 0.72658000  | 0.76906000  | 10.05662000 | #O  |
| 2.19514000  | 5.28288000  | 8.76249000  | #O  |
| 2.20115000  | 2.77515000  | 8.77169000  | #O  |
| 0.72327000  | 0.78563000  | 7.45116000  | #O  |
| 0.71610000  | 4.02792000  | 6.76928000  | #O  |
| 2.19865000  | 2.07521000  | 5.45488000  | #O  |
| 2.19578000  | 5.97875000  | 5.45411000  | #O  |
| 0.71638000  | 4.02938000  | 4.19622000  | #O  |
| 0.71994000  | 0.76373000  | 3.47292000  | #O  |
| 2.19565000  | 5.23893000  | 2.02949000  | #O  |
| 2.19834000  | 2.79895000  | 2.04486000  | #O  |
| 0.71796000  | 0.77999000  | 0.89223000  | #O  |
| 0.70839000  | 7.29225000  | 16.64722000 | #O  |
| 2.20085000  | 11.76089000 | 15.50651000 | #O  |
| 2.19461000  | 9.32918000  | 15.53738000 | #O  |
| 0.69934000  | 7.34312000  | 14.06871000 | #O  |
| 0.71847000  | 10.53414000 | 13.34401000 | #O  |
| 2.19450000  | 8.59110000  | 12.05441000 | #O  |
| 2.19950000  | 12.47350000 | 12.05254000 | #O  |
| 0.72050000  | 10.53262000 | 10.75921000 | #O  |
| 0.71259000  | 7.27755000  | 10.05625000 | #O  |
| 2.19456000  | 11.77596000 | 8.75096000  | #O  |
| 2.19801000  | 9.26977000  | 8.76414000  | #O  |
| 0.72504000  | 7.28081000  | 7.45486000  | #O  |
| 0.71646000  | 10.51333000 | 6.75192000  | #O  |
| 2.19797000  | 8.57389000  | 5.44048000  | #O  |
| 2.19632000  | 12.46543000 | 5.45967000  | #O  |
| 0.71643000  | 10.51679000 | 4.17629000  | #O  |
| 0.71550000  | 7.26817000  | 3.45739000  | #O  |
| 2.19643000  | 11.73132000 | 2.01601000  | #O  |
| 2.19715000  | 9.29120000  | 2.01820000  | #O  |
| 0.71981000  | 7.26832000  | 0.86921000  | #O  |
| 3.65528000  | 4.03012000  | 15.41506000 | #Ti |
| 5.15919000  | 0.79368000  | 15.50762000 | #Ti |
| 3.67183000  | 0.80481000  | 12.14459000 | #Ti |
| 5.13563000  | 4.04927000  | 12.14577000 | #Ti |
| 3.65109000  | 4.02045000  | 8.82308000  | #Ti |
| 5.01761000  | 0.78392000  | 8.74602000  | #Ti |
| 3.67123000  | 0.79795000  | 5.34104000  | #Ti |
| 5.16149000  | 4.03971000  | 5.60805000  | #Ti |
| 3.67694000  | 4.02020000  | 2.39407000  | #Ti |
| 5.15598000  | 0.77339000  | 1.98128000  | #Ti |

|             |             |             |     |
|-------------|-------------|-------------|-----|
| 6.64076000  | 4.04175000  | 15.31633000 | #Ti |
| 8.11909000  | 0.79193000  | 15.51153000 | #Ti |
| 6.63228000  | 0.79642000  | 12.16528000 | #Ti |
| 8.10192000  | 4.04292000  | 12.10898000 | #Ti |
| 6.60174000  | 4.03730000  | 8.90762000  | #Ti |
| 7.97041000  | 0.78245000  | 8.76149000  | #Ti |
| 6.63321000  | 0.79158000  | 5.34243000  | #Ti |
| 8.10004000  | 4.05091000  | 5.60034000  | #Ti |
| 6.63470000  | 4.01774000  | 2.39175000  | #Ti |
| 8.11477000  | 0.77372000  | 1.98216000  | #Ti |
| 9.58116000  | 4.04646000  | 15.31207000 | #Ti |
| 11.08054000 | 0.81535000  | 15.52356000 | #Ti |
| 9.59077000  | 0.78909000  | 12.16671000 | #Ti |
| 11.02129000 | 4.04969000  | 11.97641000 | #Ti |
| 9.55328000  | 4.01795000  | 8.81022000  | #Ti |
| 10.92865000 | 0.78299000  | 8.74983000  | #Ti |
| 9.58336000  | 0.79720000  | 5.34442000  | #Ti |
| 11.07086000 | 4.04284000  | 5.59036000  | #Ti |
| 9.59361000  | 4.02039000  | 2.39210000  | #Ti |
| 11.07154000 | 0.77305000  | 1.98176000  | #Ti |
| 3.68095000  | 10.52425000 | 15.15849000 | #Ti |
| 5.18763000  | 7.29007000  | 15.53581000 | #Ti |
| 3.68102000  | 7.31253000  | 12.20364000 | #Ti |
| 5.15077000  | 10.55503000 | 11.95814000 | #Ti |
| 3.62208000  | 10.54129000 | 8.76094000  | #Ti |
| 4.99359000  | 7.26797000  | 8.74172000  | #Ti |
| 3.67216000  | 7.28719000  | 5.30845000  | #Ti |
| 5.14955000  | 10.54503000 | 5.55497000  | #Ti |
| 3.67611000  | 10.51482000 | 2.36096000  | #Ti |
| 5.15310000  | 7.26128000  | 1.94790000  | #Ti |
| 6.63733000  | 10.55291000 | 15.14888000 | #Ti |
| 8.02341000  | 7.30057000  | 15.24092000 | #Ti |
| 6.62927000  | 7.29025000  | 11.91551000 | #Ti |
| 8.11049000  | 10.54373000 | 11.95451000 | #Ti |
| 6.58074000  | 10.50032000 | 8.75705000  | #Ti |
| 8.05042000  | 7.26902000  | 8.60381000  | #Ti |
| 6.62470000  | 7.28671000  | 5.29871000  | #Ti |
| 8.10888000  | 10.53337000 | 5.55072000  | #Ti |
| 6.63499000  | 10.51250000 | 2.35980000  | #Ti |
| 8.11438000  | 7.26062000  | 1.94276000  | #Ti |
| 9.59494000  | 10.53178000 | 15.15064000 | #Ti |
| 11.13784000 | 7.30624000  | 15.51306000 | #Ti |
| 9.59591000  | 7.30214000  | 12.13305000 | #Ti |
| 11.07066000 | 10.54814000 | 11.95700000 | #Ti |
| 9.54074000  | 10.54011000 | 8.75864000  | #Ti |
| 10.98337000 | 7.26400000  | 8.82471000  | #Ti |
| 9.59526000  | 7.28654000  | 5.29529000  | #Ti |
| 11.06714000 | 10.55308000 | 5.55560000  | #Ti |
| 9.59429000  | 10.51464000 | 2.35978000  | #Ti |
| 11.08115000 | 7.26015000  | 1.95759000  | #Ti |
| 0.69913000  | 4.09029000  | 15.08904000 | #Ti |
| 2.20403000  | 0.78005000  | 15.49007000 | #Ti |
| 0.70979000  | 0.81194000  | 12.15238000 | #Ti |
| 2.24406000  | 4.05627000  | 11.99980000 | #Ti |
| 0.68664000  | 4.03073000  | 8.83654000  | #Ti |

|            |             |             |     |
|------------|-------------|-------------|-----|
| 2.05271000 | 0.78433000  | 8.75160000  | #Ti |
| 0.71514000 | 0.80034000  | 5.34038000  | #Ti |
| 2.19381000 | 4.05263000  | 5.59010000  | #Ti |
| 0.71772000 | 4.01668000  | 2.38831000  | #Ti |
| 2.19693000 | 0.77341000  | 1.97956000  | #Ti |
| 0.71510000 | 10.55882000 | 15.15704000 | #Ti |
| 2.24054000 | 7.30236000  | 15.56104000 | #Ti |
| 0.72415000 | 7.29974000  | 12.17646000 | #Ti |
| 2.19210000 | 10.55984000 | 11.96122000 | #Ti |
| 0.66453000 | 10.50430000 | 8.75855000  | #Ti |
| 2.07515000 | 7.26742000  | 8.72777000  | #Ti |
| 0.70955000 | 7.29510000  | 5.33262000  | #Ti |
| 2.19168000 | 10.54425000 | 5.55418000  | #Ti |
| 0.71774000 | 10.51199000 | 2.36254000  | #Ti |
| 2.19483000 | 7.25970000  | 1.96548000  | #Ti |

Rut-Arg-Z

1.000000000

11.834800 0.000000 0.000000

0.000000 12.992946 0.000000

0.000000 0.000000 30.000000

H C N O Ti

14 6 4 162 80

Cartesian

|            |            |             |    |
|------------|------------|-------------|----|
| 7.43991000 | 3.96919000 | 20.68715000 | #H |
| 7.48182000 | 5.64539000 | 21.17240000 | #H |
| 5.21200000 | 5.73293000 | 20.81395000 | #H |
| 5.49838000 | 5.60263000 | 19.08835000 | #H |
| 5.56597000 | 3.04455000 | 19.36839000 | #H |
| 5.18247000 | 3.27653000 | 21.07635000 | #H |
| 3.01009000 | 3.34843000 | 20.55136000 | #H |
| 1.37857000 | 2.74465000 | 19.17770000 | #H |
| 1.58759000 | 2.75910000 | 17.50738000 | #H |
| 4.78725000 | 4.20535000 | 17.74923000 | #H |
| 9.21769000 | 5.14910000 | 19.59078000 | #H |
| 8.90593000 | 6.94141000 | 18.00400000 | #H |
| 7.27053000 | 6.88379000 | 18.04383000 | #H |
| 8.09860000 | 7.36660000 | 19.48857000 | #H |
| 7.20649000 | 4.98705000 | 20.33251000 | #C |
| 5.69105000 | 5.10556000 | 20.04925000 | #C |
| 5.04317000 | 3.71092000 | 20.07571000 | #C |
| 3.10736000 | 3.60372000 | 18.53398000 | #C |
| 8.12019000 | 4.43962000 | 17.91260000 | #C |
| 8.19855000 | 5.28328000 | 19.20322000 | #C |
| 3.60944000 | 3.67082000 | 19.80236000 | #N |
| 1.80449000 | 3.22267000 | 18.39128000 | #N |
| 3.83739000 | 3.93433000 | 17.49343000 | #N |
| 8.10588000 | 6.69757000 | 18.71477000 | #N |
| 9.24291000 | 4.16408000 | 17.39277000 | #O |
| 6.97099000 | 4.21280000 | 17.41019000 | #O |
| 3.67111000 | 0.82360000 | 16.61297000 | #O |
| 5.14774000 | 5.27342000 | 15.41963000 | #O |
| 5.18781000 | 2.78312000 | 15.36955000 | #O |
| 3.66677000 | 0.74834000 | 14.04048000 | #O |

|             |            |             |    |
|-------------|------------|-------------|----|
| 3.65017000  | 4.02752000 | 13.36630000 | #O |
| 5.15679000  | 2.07530000 | 12.08243000 | #O |
| 5.15276000  | 6.01014000 | 12.10045000 | #O |
| 3.69091000  | 4.04894000 | 10.78943000 | #O |
| 3.68424000  | 0.77799000 | 10.06588000 | #O |
| 5.16249000  | 5.29118000 | 8.77174000  | #O |
| 5.15211000  | 2.78152000 | 8.77671000  | #O |
| 3.68344000  | 0.78195000 | 7.45870000  | #O |
| 3.67554000  | 4.03953000 | 6.78013000  | #O |
| 5.15783000  | 2.07994000 | 5.46580000  | #O |
| 5.15931000  | 5.98524000 | 5.45427000  | #O |
| 3.67638000  | 4.03131000 | 4.20316000  | #O |
| 3.67672000  | 0.76757000 | 3.48452000  | #O |
| 5.15740000  | 5.24049000 | 2.03057000  | #O |
| 5.15588000  | 2.79881000 | 2.05504000  | #O |
| 3.67579000  | 0.77370000 | 0.90447000  | #O |
| 6.63697000  | 0.82557000 | 16.61976000 | #O |
| 8.13339000  | 5.30339000 | 15.23995000 | #O |
| 8.11535000  | 2.76895000 | 15.30477000 | #O |
| 6.63023000  | 0.70946000 | 14.03963000 | #O |
| 6.62608000  | 4.04266000 | 13.36200000 | #O |
| 8.11146000  | 2.07315000 | 12.08834000 | #O |
| 8.11853000  | 6.00766000 | 12.10521000 | #O |
| 6.63357000  | 4.04327000 | 10.80946000 | #O |
| 6.63929000  | 0.77765000 | 10.06392000 | #O |
| 8.10825000  | 5.29354000 | 8.76998000  | #O |
| 8.11433000  | 2.78043000 | 8.77327000  | #O |
| 6.64132000  | 0.78229000 | 7.45961000  | #O |
| 6.63653000  | 4.03787000 | 6.78010000  | #O |
| 8.11487000  | 2.08010000 | 5.46609000  | #O |
| 8.11358000  | 5.98611000 | 5.45080000  | #O |
| 6.63447000  | 4.03158000 | 4.20283000  | #O |
| 6.63778000  | 0.76393000 | 3.48339000  | #O |
| 8.11110000  | 5.24089000 | 2.02554000  | #O |
| 8.11479000  | 2.79938000 | 2.05298000  | #O |
| 6.63479000  | 0.77714000 | 0.90362000  | #O |
| 9.58950000  | 0.81616000 | 16.62305000 | #O |
| 11.08565000 | 5.28565000 | 15.44961000 | #O |
| 11.10239000 | 2.81387000 | 15.47288000 | #O |
| 9.62088000  | 0.74308000 | 14.04403000 | #O |
| 9.62583000  | 4.02006000 | 13.34563000 | #O |
| 11.07915000 | 2.08119000 | 12.05093000 | #O |
| 11.07471000 | 6.00795000 | 12.07708000 | #O |
| 9.56597000  | 4.04823000 | 10.77990000 | #O |
| 9.59961000  | 0.77784000 | 10.06300000 | #O |
| 11.06316000 | 5.29123000 | 8.76679000  | #O |
| 11.06687000 | 2.78124000 | 8.77278000  | #O |
| 9.60043000  | 0.78173000 | 7.45751000  | #O |
| 9.59267000  | 4.03711000 | 6.77499000  | #O |
| 11.07354000 | 2.08092000 | 5.46193000  | #O |
| 11.06805000 | 5.98542000 | 5.45444000  | #O |
| 9.59334000  | 4.03323000 | 4.19791000  | #O |
| 9.59468000  | 0.76532000 | 3.48326000  | #O |
| 11.07407000 | 5.23970000 | 2.02098000  | #O |
| 11.07331000 | 2.79804000 | 2.05582000  | #O |

|             |             |             |    |
|-------------|-------------|-------------|----|
| 9.59289000  | 0.77376000  | 0.90385000  | #O |
| 3.69831000  | 7.25997000  | 16.68528000 | #O |
| 5.15117000  | 11.74735000 | 15.52372000 | #O |
| 5.15485000  | 9.32007000  | 15.54882000 | #O |
| 3.64575000  | 7.33178000  | 14.09424000 | #O |
| 3.67823000  | 10.52561000 | 13.35359000 | #O |
| 5.14533000  | 8.58720000  | 12.05263000 | #O |
| 5.14892000  | 12.46847000 | 12.04568000 | #O |
| 3.66927000  | 10.52658000 | 10.76607000 | #O |
| 3.68054000  | 7.27876000  | 10.02842000 | #O |
| 5.15471000  | 11.77500000 | 8.75730000  | #O |
| 5.15798000  | 9.26746000  | 8.76651000  | #O |
| 3.68676000  | 7.28098000  | 7.44797000  | #O |
| 3.67465000  | 10.50922000 | 6.75895000  | #O |
| 5.15792000  | 8.57585000  | 5.43874000  | #O |
| 5.15641000  | 12.46963000 | 5.47076000  | #O |
| 3.67489000  | 10.52562000 | 4.18306000  | #O |
| 3.67704000  | 7.26829000  | 3.44959000  | #O |
| 5.15590000  | 11.73022000 | 2.02277000  | #O |
| 5.15397000  | 9.28989000  | 2.01932000  | #O |
| 3.67034000  | 7.26193000  | 0.86341000  | #O |
| 6.66487000  | 7.23481000  | 16.64558000 | #O |
| 8.11488000  | 11.74636000 | 15.52635000 | #O |
| 8.11262000  | 9.32047000  | 15.51360000 | #O |
| 6.61274000  | 7.36889000  | 14.07010000 | #O |
| 6.63040000  | 10.53209000 | 13.34744000 | #O |
| 8.11339000  | 8.59827000  | 12.05432000 | #O |
| 8.12136000  | 12.47498000 | 12.05196000 | #O |
| 6.63280000  | 10.53206000 | 10.76783000 | #O |
| 6.65308000  | 7.28128000  | 10.07606000 | #O |
| 8.11218000  | 11.77466000 | 8.75843000  | #O |
| 8.11387000  | 9.26568000  | 8.76731000  | #O |
| 6.63847000  | 7.28433000  | 7.46373000  | #O |
| 6.63317000  | 10.51498000 | 6.75973000  | #O |
| 8.11428000  | 8.57366000  | 5.43707000  | #O |
| 8.11450000  | 12.46805000 | 5.46899000  | #O |
| 6.63339000  | 10.52538000 | 4.18147000  | #O |
| 6.63578000  | 7.27253000  | 3.44032000  | #O |
| 8.11306000  | 11.72889000 | 2.02101000  | #O |
| 8.11304000  | 9.28826000  | 2.01961000  | #O |
| 6.62769000  | 7.26632000  | 0.85433000  | #O |
| 9.54695000  | 7.25605000  | 16.65114000 | #O |
| 11.07908000 | 11.75571000 | 15.51944000 | #O |
| 11.07456000 | 9.32725000  | 15.55632000 | #O |
| 9.62644000  | 7.37295000  | 14.07714000 | #O |
| 9.59669000  | 10.53335000 | 13.34941000 | #O |
| 11.08389000 | 8.59079000  | 12.05442000 | #O |
| 11.07837000 | 12.47256000 | 12.04694000 | #O |
| 9.59367000  | 10.52981000 | 10.76727000 | #O |
| 9.58148000  | 7.28394000  | 10.07351000 | #O |
| 11.07243000 | 11.77596000 | 8.75522000  | #O |
| 11.06454000 | 9.26884000  | 8.76564000  | #O |
| 9.58392000  | 7.28223000  | 7.46523000  | #O |
| 9.58954000  | 10.51150000 | 6.75874000  | #O |
| 11.06800000 | 8.57514000  | 5.43823000  | #O |

|             |             |             |     |
|-------------|-------------|-------------|-----|
| 11.07472000 | 12.46930000 | 5.46955000  | #O  |
| 9.59132000  | 10.52483000 | 4.18075000  | #O  |
| 9.59037000  | 7.26813000  | 3.43697000  | #O  |
| 11.07377000 | 11.72995000 | 2.02441000  | #O  |
| 11.07198000 | 9.28975000  | 2.01850000  | #O  |
| 9.59445000  | 7.26379000  | 0.85404000  | #O  |
| 0.73116000  | 0.81343000  | 16.63457000 | #O  |
| 2.17069000  | 5.27754000  | 15.46665000 | #O  |
| 2.14445000  | 2.80204000  | 15.46127000 | #O  |
| 0.71446000  | 0.75852000  | 14.04463000 | #O  |
| 0.70920000  | 4.04645000  | 13.31500000 | #O  |
| 2.19350000  | 2.07663000  | 12.06287000 | #O  |
| 2.19213000  | 6.00611000  | 12.08082000 | #O  |
| 0.72048000  | 4.04545000  | 10.77314000 | #O  |
| 0.72486000  | 0.77725000  | 10.05801000 | #O  |
| 2.19395000  | 5.28782000  | 8.76343000  | #O  |
| 2.20248000  | 2.78108000  | 8.77203000  | #O  |
| 0.72618000  | 0.78633000  | 7.45344000  | #O  |
| 0.71459000  | 4.03860000  | 6.77390000  | #O  |
| 2.19781000  | 2.08250000  | 5.46676000  | #O  |
| 2.19436000  | 5.98532000  | 5.45395000  | #O  |
| 0.71816000  | 4.03470000  | 4.19998000  | #O  |
| 0.72198000  | 0.76385000  | 3.48340000  | #O  |
| 2.19590000  | 5.23970000  | 2.02884000  | #O  |
| 2.19692000  | 2.80011000  | 2.05183000  | #O  |
| 0.71638000  | 0.77703000  | 0.90338000  | #O  |
| 0.70182000  | 7.28595000  | 16.68982000 | #O  |
| 2.19566000  | 11.74499000 | 15.52105000 | #O  |
| 2.19638000  | 9.31617000  | 15.54837000 | #O  |
| 0.73073000  | 7.32319000  | 14.09620000 | #O  |
| 0.71343000  | 10.52633000 | 13.35439000 | #O  |
| 2.19282000  | 8.59120000  | 12.06545000 | #O  |
| 2.19450000  | 12.47267000 | 12.05915000 | #O  |
| 0.71898000  | 10.53174000 | 10.76533000 | #O  |
| 0.70653000  | 7.28120000  | 10.02970000 | #O  |
| 2.19539000  | 11.77603000 | 8.75479000  | #O  |
| 2.19416000  | 9.27111000  | 8.75992000  | #O  |
| 0.70778000  | 7.28278000  | 7.45588000  | #O  |
| 0.71293000  | 10.51396000 | 6.75861000  | #O  |
| 2.19633000  | 8.57303000  | 5.43985000  | #O  |
| 2.19711000  | 12.46799000 | 5.47037000  | #O  |
| 0.71640000  | 10.52264000 | 4.18336000  | #O  |
| 0.71164000  | 7.26860000  | 3.44949000  | #O  |
| 2.19538000  | 11.72986000 | 2.02298000  | #O  |
| 2.19673000  | 9.28944000  | 2.02516000  | #O  |
| 0.72060000  | 7.26906000  | 0.86321000  | #O  |
| 3.64330000  | 4.00441000  | 15.41872000 | #Ti |
| 5.15589000  | 0.78127000  | 15.51538000 | #Ti |
| 3.65563000  | 0.79314000  | 12.15762000 | #Ti |
| 5.12763000  | 4.03185000  | 12.14101000 | #Ti |
| 3.65872000  | 4.03453000  | 8.83203000  | #Ti |
| 5.01729000  | 0.78756000  | 8.76275000  | #Ti |
| 3.67786000  | 0.80229000  | 5.35369000  | #Ti |
| 5.16212000  | 4.05255000  | 5.61192000  | #Ti |
| 3.67639000  | 4.01955000  | 2.39974000  | #Ti |

|             |             |             |     |
|-------------|-------------|-------------|-----|
| 5.15454000  | 0.77239000  | 1.99298000  | #Ti |
| 6.62746000  | 4.04336000  | 15.29402000 | #Ti |
| 8.11188000  | 0.77832000  | 15.52136000 | #Ti |
| 6.64197000  | 0.80904000  | 12.17397000 | #Ti |
| 8.10010000  | 4.10157000  | 12.10404000 | #Ti |
| 6.61088000  | 4.02682000  | 8.90947000  | #Ti |
| 7.97348000  | 0.78582000  | 8.76258000  | #Ti |
| 6.62921000  | 0.79337000  | 5.35524000  | #Ti |
| 8.10163000  | 4.04327000  | 5.60475000  | #Ti |
| 6.63438000  | 4.01789000  | 2.39586000  | #Ti |
| 8.11269000  | 0.77181000  | 1.99538000  | #Ti |
| 9.57301000  | 4.00789000  | 15.29817000 | #Ti |
| 11.07724000 | 0.79533000  | 15.53666000 | #Ti |
| 9.57585000  | 0.81085000  | 12.18163000 | #Ti |
| 11.02471000 | 4.04349000  | 11.98520000 | #Ti |
| 9.56444000  | 4.03392000  | 8.81538000  | #Ti |
| 10.92886000 | 0.78725000  | 8.76814000  | #Ti |
| 9.58736000  | 0.79741000  | 5.35771000  | #Ti |
| 11.07198000 | 4.05471000  | 5.59197000  | #Ti |
| 9.59286000  | 4.01997000  | 2.39434000  | #Ti |
| 11.06961000 | 0.77203000  | 1.99423000  | #Ti |
| 3.67995000  | 10.51817000 | 15.16891000 | #Ti |
| 5.21151000  | 7.27597000  | 15.58370000 | #Ti |
| 3.68276000  | 7.30328000  | 12.28444000 | #Ti |
| 5.14870000  | 10.57398000 | 11.96817000 | #Ti |
| 3.63129000  | 10.52650000 | 8.77161000  | #Ti |
| 5.06642000  | 7.27268000  | 8.67033000  | #Ti |
| 3.66646000  | 7.28936000  | 5.31705000  | #Ti |
| 5.15044000  | 10.53873000 | 5.56408000  | #Ti |
| 3.67516000  | 10.51494000 | 2.37029000  | #Ti |
| 5.14618000  | 7.26058000  | 1.94829000  | #Ti |
| 6.63472000  | 10.52506000 | 15.16116000 | #Ti |
| 8.12260000  | 7.29189000  | 15.18052000 | #Ti |
| 6.60461000  | 7.30714000  | 11.94159000 | #Ti |
| 8.10988000  | 10.53916000 | 11.97365000 | #Ti |
| 6.59149000  | 10.52612000 | 8.77399000  | #Ti |
| 8.09562000  | 7.27128000  | 8.63974000  | #Ti |
| 6.63224000  | 7.28814000  | 5.28425000  | #Ti |
| 8.10833000  | 10.54326000 | 5.56383000  | #Ti |
| 6.63382000  | 10.51177000 | 2.36874000  | #Ti |
| 8.11062000  | 7.26020000  | 1.93051000  | #Ti |
| 9.59420000  | 10.53193000 | 15.16315000 | #Ti |
| 11.02044000 | 7.28553000  | 15.60203000 | #Ti |
| 9.61649000  | 7.32344000  | 11.93108000 | #Ti |
| 11.07058000 | 10.58282000 | 11.96980000 | #Ti |
| 9.55106000  | 10.52253000 | 8.77476000  | #Ti |
| 11.12834000 | 7.26923000  | 8.65865000  | #Ti |
| 9.59020000  | 7.28754000  | 5.28054000  | #Ti |
| 11.06587000 | 10.54117000 | 5.56381000  | #Ti |
| 9.59246000  | 10.51335000 | 2.36827000  | #Ti |
| 11.07711000 | 7.26034000  | 1.94426000  | #Ti |
| 0.69132000  | 4.08605000  | 15.10918000 | #Ti |
| 2.20024000  | 0.75684000  | 15.49885000 | #Ti |
| 0.72250000  | 0.81254000  | 12.16630000 | #Ti |
| 2.23794000  | 4.08336000  | 12.01871000 | #Ti |



|            |             |             |     |
|------------|-------------|-------------|-----|
| 0.69635000 | 4.02310000  | 8.84589000  | #Ti |
| 2.05490000 | 0.78752000  | 8.75236000  | #Ti |
| 0.70565000 | 0.80030000  | 5.35417000  | #Ti |
| 2.19441000 | 4.04032000  | 5.59933000  | #Ti |
| 0.71735000 | 4.01901000  | 2.39232000  | #Ti |
| 2.19344000 | 0.77295000  | 1.99328000  | #Ti |
| 0.71222000 | 10.52402000 | 15.17063000 | #Ti |
| 2.19953000 | 7.28677000  | 15.63654000 | #Ti |
| 0.70013000 | 7.29919000  | 12.28497000 | #Ti |
| 2.19011000 | 10.52328000 | 11.97310000 | #Ti |
| 0.67351000 | 10.52801000 | 8.77082000  | #Ti |
| 2.17738000 | 7.27187000  | 8.88297000  | #Ti |
| 0.72300000 | 7.29467000  | 5.31284000  | #Ti |
| 2.19116000 | 10.55963000 | 5.56411000  | #Ti |
| 0.71662000 | 10.51182000 | 2.37043000  | #Ti |
| 2.19588000 | 7.26039000  | 1.96210000  | #Ti |

#### Rut-Arg-C

1.000000000

11.834800 0.000000 0.000000

0.000000 12.992946 0.000000

0.000000 0.000000 30.000000

H C N O Ti

14 6 4 162 80

Cartesian

|            |             |             |    |
|------------|-------------|-------------|----|
| 5.72010000 | 3.67108000  | 17.89362000 | #H |
| 7.30112000 | 3.37500000  | 17.97868000 | #H |
| 8.14701000 | 3.46757000  | 20.99117000 | #H |
| 4.93556000 | 5.16381000  | 19.75575000 | #H |
| 4.81016000 | 5.93555000  | 18.17036000 | #H |
| 4.68839000 | 7.30736000  | 20.54541000 | #H |
| 6.42581000 | 7.42961000  | 20.26018000 | #H |
| 5.87126000 | 8.24551000  | 17.88952000 | #H |
| 4.17047000 | 8.32205000  | 18.34706000 | #H |
| 4.84875000 | 12.86586000 | 18.56178000 | #H |
| 6.16317000 | 9.95489000  | 19.81303000 | #H |
| 3.28745000 | 11.60810000 | 17.68657000 | #H |
| 7.37794000 | 6.04368000  | 18.13489000 | #H |
| 5.70762000 | 12.19360000 | 19.90773000 | #H |
| 6.80327000 | 5.27202000  | 18.66087000 | #C |
| 7.59025000 | 4.92360000  | 19.91399000 | #C |
| 5.42885000 | 5.87904000  | 19.07785000 | #C |
| 5.45647000 | 7.28515000  | 19.75820000 | #C |
| 5.19177000 | 8.39425000  | 18.73182000 | #C |
| 4.75393000 | 10.83845000 | 18.66897000 | #C |
| 6.63087000 | 4.10893000  | 17.72443000 | #N |
| 5.36763000 | 9.77126000  | 19.20869000 | #N |
| 5.01258000 | 12.07235000 | 19.18122000 | #N |
| 3.83894000 | 10.74110000 | 17.68122000 | #N |
| 8.11019000 | 5.74387000  | 20.64623000 | #O |
| 7.62876000 | 3.57341000  | 20.16602000 | #O |
| 0.88903000 | 0.74584000  | 16.64191000 | #O |
| 2.35564000 | 5.21041000  | 15.47453000 | #O |
| 2.34103000 | 2.77604000  | 15.51030000 | #O |

|            |            |             |    |
|------------|------------|-------------|----|
| 0.88817000 | 0.75994000 | 14.06282000 | #O |
| 0.88141000 | 4.01749000 | 13.32257000 | #O |
| 2.35870000 | 2.06483000 | 12.05732000 | #O |
| 2.36155000 | 5.95509000 | 12.01845000 | #O |
| 0.87230000 | 3.99876000 | 10.74586000 | #O |
| 0.88788000 | 0.77315000 | 10.06982000 | #O |
| 2.36077000 | 5.27547000 | 8.76506000  | #O |
| 2.36210000 | 2.76920000 | 8.75569000  | #O |
| 0.89111000 | 0.77321000 | 7.45704000  | #O |
| 0.88211000 | 4.04088000 | 6.75256000  | #O |
| 2.36223000 | 2.08501000 | 5.46511000  | #O |
| 2.36189000 | 5.97836000 | 5.43375000  | #O |
| 0.88045000 | 4.02602000 | 4.17933000  | #O |
| 0.88215000 | 0.78916000 | 3.47401000  | #O |
| 2.36286000 | 5.25727000 | 2.02436000  | #O |
| 2.36339000 | 2.81694000 | 2.02287000  | #O |
| 0.88160000 | 0.78692000 | 0.89257000  | #O |
| 3.84943000 | 0.71456000 | 16.65206000 | #O |
| 5.25858000 | 5.24255000 | 15.40631000 | #O |
| 5.29464000 | 2.79260000 | 15.52421000 | #O |
| 3.84129000 | 0.79714000 | 14.05815000 | #O |
| 3.82123000 | 3.99377000 | 13.31833000 | #O |
| 5.32662000 | 2.06330000 | 12.07651000 | #O |
| 5.31964000 | 5.95744000 | 12.02773000 | #O |
| 3.85860000 | 4.00209000 | 10.76410000 | #O |
| 3.85579000 | 0.77414000 | 10.07918000 | #O |
| 5.32306000 | 5.27754000 | 8.76797000  | #O |
| 5.32159000 | 2.76881000 | 8.75254000  | #O |
| 3.84579000 | 0.77385000 | 7.46209000  | #O |
| 3.83823000 | 4.04079000 | 6.75898000  | #O |
| 5.32160000 | 2.08367000 | 5.46872000  | #O |
| 5.32108000 | 5.97796000 | 5.43546000  | #O |
| 3.84246000 | 4.02555000 | 4.18265000  | #O |
| 3.84281000 | 0.79467000 | 3.47397000  | #O |
| 5.32099000 | 5.25933000 | 2.02948000  | #O |
| 5.32147000 | 2.81911000 | 2.02442000  | #O |
| 3.84179000 | 0.78380000 | 0.89106000  | #O |
| 6.77984000 | 0.77944000 | 16.64614000 | #O |
| 8.31530000 | 5.24734000 | 15.47086000 | #O |
| 8.28046000 | 2.79968000 | 15.53452000 | #O |
| 6.81072000 | 0.77286000 | 14.06243000 | #O |
| 6.79594000 | 4.02568000 | 13.39358000 | #O |
| 8.28784000 | 2.06293000 | 12.08725000 | #O |
| 8.29310000 | 5.95982000 | 12.04312000 | #O |
| 6.80527000 | 3.99958000 | 10.78762000 | #O |
| 6.81284000 | 0.77671000 | 10.08027000 | #O |
| 8.27390000 | 5.27652000 | 8.76294000  | #O |
| 8.27397000 | 2.76935000 | 8.75593000  | #O |
| 6.80157000 | 0.77081000 | 7.46610000  | #O |
| 6.79601000 | 4.04152000 | 6.76706000  | #O |
| 8.27834000 | 2.08363000 | 5.47256000  | #O |
| 8.27602000 | 5.97967000 | 5.44106000  | #O |
| 6.79953000 | 4.02439000 | 4.18760000  | #O |
| 6.79791000 | 0.78980000 | 3.47573000  | #O |
| 8.27956000 | 5.25847000 | 2.02980000  | #O |

|            |             |             |    |
|------------|-------------|-------------|----|
| 8.27890000 | 2.81843000  | 2.02548000  | #O |
| 6.80076000 | 0.78774000  | 0.89279000  | #O |
| 0.88517000 | 7.24833000  | 16.59916000 | #O |
| 2.34459000 | 11.72385000 | 15.50390000 | #O |
| 2.33591000 | 9.26485000  | 15.47567000 | #O |
| 0.87461000 | 7.23737000  | 14.01996000 | #O |
| 0.86878000 | 10.50705000 | 13.34293000 | #O |
| 2.34763000 | 8.55298000  | 12.03853000 | #O |
| 2.36357000 | 12.46605000 | 12.08716000 | #O |
| 0.90110000 | 10.51944000 | 10.77345000 | #O |
| 0.88385000 | 7.26525000  | 10.03697000 | #O |
| 2.36294000 | 11.77198000 | 8.76950000  | #O |
| 2.36407000 | 9.26295000  | 8.75997000  | #O |
| 0.88810000 | 7.26629000  | 7.43769000  | #O |
| 0.88093000 | 10.52823000 | 6.76477000  | #O |
| 2.36272000 | 8.57747000  | 5.45186000  | #O |
| 2.36417000 | 12.47595000 | 5.45291000  | #O |
| 0.88219000 | 10.52759000 | 4.18974000  | #O |
| 0.88154000 | 7.28654000  | 3.45568000  | #O |
| 2.36251000 | 11.75335000 | 2.04066000  | #O |
| 2.36236000 | 9.31276000  | 2.02505000  | #O |
| 0.88093000 | 7.28531000  | 0.87319000  | #O |
| 3.84776000 | 7.22314000  | 16.50823000 | #O |
| 5.34666000 | 11.74736000 | 15.44273000 | #O |
| 5.35316000 | 9.28750000  | 15.52457000 | #O |
| 3.84057000 | 7.27329000  | 13.96941000 | #O |
| 3.84702000 | 10.48667000 | 13.37582000 | #O |
| 5.32912000 | 8.55827000  | 12.01691000 | #O |
| 5.32712000 | 12.46776000 | 12.08626000 | #O |
| 3.83730000 | 10.52360000 | 10.79329000 | #O |
| 3.85322000 | 7.26978000  | 10.03976000 | #O |
| 5.31578000 | 11.77171000 | 8.76880000  | #O |
| 5.31426000 | 9.26179000  | 8.75630000  | #O |
| 3.84396000 | 7.26255000  | 7.43707000  | #O |
| 3.83915000 | 10.52659000 | 6.77292000  | #O |
| 5.31948000 | 8.57640000  | 5.45656000  | #O |
| 5.32049000 | 12.47601000 | 5.45918000  | #O |
| 3.84306000 | 10.52687000 | 4.19261000  | #O |
| 3.84259000 | 7.28726000  | 3.45123000  | #O |
| 5.32082000 | 11.75317000 | 2.03572000  | #O |
| 5.32080000 | 9.31288000  | 2.02452000  | #O |
| 3.83981000 | 7.28634000  | 0.86905000  | #O |
| 6.78337000 | 7.21880000  | 16.48581000 | #O |
| 8.28140000 | 11.73800000 | 15.50493000 | #O |
| 8.27924000 | 9.30349000  | 15.48746000 | #O |
| 6.80650000 | 7.27804000  | 13.96548000 | #O |
| 6.81986000 | 10.49509000 | 13.32821000 | #O |
| 8.29110000 | 8.56437000  | 12.01967000 | #O |
| 8.28452000 | 12.45966000 | 12.07128000 | #O |
| 6.78406000 | 10.52575000 | 10.76700000 | #O |
| 6.81811000 | 7.26327000  | 10.04173000 | #O |
| 8.27676000 | 11.77140000 | 8.76254000  | #O |
| 8.27828000 | 9.26403000  | 8.75374000  | #O |
| 6.79721000 | 7.27191000  | 7.44358000  | #O |
| 6.80152000 | 10.52676000 | 6.76377000  | #O |

|             |             |             |     |
|-------------|-------------|-------------|-----|
| 8.27883000  | 8.57797000  | 5.45140000  | #O  |
| 8.27981000  | 12.47531000 | 5.45266000  | #O  |
| 6.79507000  | 10.52757000 | 4.18786000  | #O  |
| 6.79816000  | 7.28852000  | 3.45259000  | #O  |
| 8.27846000  | 11.75353000 | 2.03870000  | #O  |
| 8.27884000  | 9.31278000  | 2.02047000  | #O  |
| 6.80048000  | 7.28427000  | 0.87012000  | #O  |
| 9.74995000  | 0.76576000  | 16.64871000 | #O  |
| 11.23160000 | 5.22250000  | 15.49770000 | #O  |
| 11.24110000 | 2.78087000  | 15.50665000 | #O  |
| 9.76143000  | 0.76600000  | 14.06928000 | #O  |
| 9.76945000  | 4.00752000  | 13.34407000 | #O  |
| 11.23990000 | 2.06263000  | 12.07420000 | #O  |
| 11.23582000 | 5.95510000  | 12.02922000 | #O  |
| 9.73704000  | 3.99879000  | 10.77244000 | #O  |
| 9.76629000  | 0.77432000  | 10.07212000 | #O  |
| 11.23483000 | 5.27451000  | 8.76420000  | #O  |
| 11.23286000 | 2.76793000  | 8.74536000  | #O  |
| 9.76209000  | 0.77124000  | 7.46024000  | #O  |
| 9.75844000  | 4.04031000  | 6.76146000  | #O  |
| 11.24030000 | 2.08374000  | 5.46771000  | #O  |
| 11.23827000 | 5.97746000  | 5.43766000  | #O  |
| 9.75585000  | 4.02590000  | 4.18569000  | #O  |
| 9.75918000  | 0.79429000  | 3.47685000  | #O  |
| 11.23721000 | 5.25837000  | 2.02821000  | #O  |
| 11.23689000 | 2.81873000  | 2.02367000  | #O  |
| 9.75879000  | 0.78475000  | 0.89381000  | #O  |
| 9.73197000  | 7.26407000  | 16.59618000 | #O  |
| 11.23556000 | 11.72712000 | 15.50201000 | #O  |
| 11.23425000 | 9.28740000  | 15.49112000 | #O  |
| 9.77472000  | 7.27067000  | 14.01753000 | #O  |
| 9.75939000  | 10.50191000 | 13.32405000 | #O  |
| 11.24479000 | 8.56063000  | 12.03668000 | #O  |
| 11.24001000 | 12.45965000 | 12.07172000 | #O  |
| 9.76486000  | 10.52098000 | 10.74729000 | #O  |
| 9.76861000  | 7.26952000  | 10.04531000 | #O  |
| 11.23753000 | 11.77144000 | 8.76491000  | #O  |
| 11.23638000 | 9.26436000  | 8.74758000  | #O  |
| 9.75749000  | 7.26304000  | 7.44651000  | #O  |
| 9.75627000  | 10.52783000 | 6.75411000  | #O  |
| 11.23635000 | 8.57667000  | 5.45824000  | #O  |
| 11.23791000 | 12.47531000 | 5.45608000  | #O  |
| 9.75973000  | 10.52560000 | 4.18375000  | #O  |
| 9.75856000  | 7.28574000  | 3.45773000  | #O  |
| 11.23947000 | 11.75329000 | 2.03559000  | #O  |
| 11.23994000 | 9.31324000  | 2.02482000  | #O  |
| 9.76101000  | 7.28540000  | 0.87468000  | #O  |
| 0.87080000  | 4.01625000  | 15.12753000 | #Ti |
| 2.35137000  | 0.74976000  | 15.52875000 | #Ti |
| 0.87659000  | 0.75036000  | 12.18108000 | #Ti |
| 2.36194000  | 4.00360000  | 11.91904000 | #Ti |
| 0.82551000  | 4.01880000  | 8.74087000  | #Ti |
| 2.21016000  | 0.77443000  | 8.75919000  | #Ti |
| 0.87767000  | 0.76403000  | 5.34383000  | #Ti |
| 2.36218000  | 4.00978000  | 5.55589000  | #Ti |

|             |             |             |     |
|-------------|-------------|-------------|-----|
| 0.88211000  | 4.03657000  | 2.36876000  | #Ti |
| 2.36041000  | 0.78892000  | 1.97843000  | #Ti |
| 3.82115000  | 3.95320000  | 15.11948000 | #Ti |
| 5.31242000  | 0.77256000  | 15.49817000 | #Ti |
| 3.83908000  | 0.77847000  | 12.15577000 | #Ti |
| 5.35300000  | 4.02260000  | 12.03221000 | #Ti |
| 3.79147000  | 4.02276000  | 8.78702000  | #Ti |
| 5.17467000  | 0.77259000  | 8.75212000  | #Ti |
| 3.83776000  | 0.76615000  | 5.33831000  | #Ti |
| 5.31674000  | 4.01555000  | 5.57319000  | #Ti |
| 3.84196000  | 4.03678000  | 2.36946000  | #Ti |
| 5.32072000  | 0.78889000  | 1.97823000  | #Ti |
| 6.80067000  | 4.10628000  | 15.37180000 | #Ti |
| 8.26406000  | 0.77930000  | 15.54816000 | #Ti |
| 6.79319000  | 0.75911000  | 12.16433000 | #Ti |
| 8.23153000  | 4.00679000  | 12.05615000 | #Ti |
| 6.74870000  | 4.01946000  | 8.79459000  | #Ti |
| 8.13460000  | 0.77042000  | 8.76416000  | #Ti |
| 6.79406000  | 0.77087000  | 5.34161000  | #Ti |
| 8.27332000  | 4.01225000  | 5.57976000  | #Ti |
| 6.79978000  | 4.03732000  | 2.37671000  | #Ti |
| 8.28059000  | 0.78907000  | 1.98229000  | #Ti |
| 0.88862000  | 10.50910000 | 15.14754000 | #Ti |
| 2.33672000  | 7.22336000  | 15.47026000 | #Ti |
| 0.87399000  | 7.25958000  | 12.14952000 | #Ti |
| 2.42756000  | 10.50983000 | 12.10291000 | #Ti |
| 0.84310000  | 10.51825000 | 8.82253000  | #Ti |
| 2.21686000  | 7.26761000  | 8.73147000  | #Ti |
| 0.87785000  | 7.25889000  | 5.32374000  | #Ti |
| 2.35892000  | 10.50833000 | 5.58752000  | #Ti |
| 0.88339000  | 10.53389000 | 2.37755000  | #Ti |
| 2.35946000  | 7.28754000  | 1.95917000  | #Ti |
| 3.85397000  | 10.43990000 | 15.64088000 | #Ti |
| 5.29468000  | 7.24731000  | 15.34115000 | #Ti |
| 3.82601000  | 7.25710000  | 12.06090000 | #Ti |
| 5.24749000  | 10.50844000 | 12.09079000 | #Ti |
| 3.79302000  | 10.52040000 | 8.81937000  | #Ti |
| 5.19180000  | 7.27022000  | 8.70100000  | #Ti |
| 3.83486000  | 7.26772000  | 5.31132000  | #Ti |
| 5.31408000  | 10.51004000 | 5.58915000  | #Ti |
| 3.84136000  | 10.53241000 | 2.38385000  | #Ti |
| 5.31884000  | 7.28788000  | 1.95334000  | #Ti |
| 6.80566000  | 10.56460000 | 15.12730000 | #Ti |
| 8.27600000  | 7.31630000  | 15.44189000 | #Ti |
| 6.79584000  | 7.27849000  | 12.05994000 | #Ti |
| 8.26224000  | 10.51025000 | 11.91527000 | #Ti |
| 6.74645000  | 10.51878000 | 8.81880000  | #Ti |
| 8.16166000  | 7.27424000  | 8.71463000  | #Ti |
| 6.79342000  | 7.26438000  | 5.30830000  | #Ti |
| 8.26395000  | 10.50750000 | 5.56217000  | #Ti |
| 6.79872000  | 10.53352000 | 2.37561000  | #Ti |
| 8.28140000  | 7.28770000  | 1.95725000  | #Ti |
| 9.76404000  | 3.98310000  | 15.15070000 | #Ti |
| 11.22821000 | 0.75139000  | 15.55798000 | #Ti |
| 9.75445000  | 0.76243000  | 12.19216000 | #Ti |

|             |             |             |     |
|-------------|-------------|-------------|-----|
| 11.21935000 | 4.00233000  | 11.93428000 | #Ti |
| 9.70070000  | 4.02236000  | 8.80370000  | #Ti |
| 11.08803000 | 0.77047000  | 8.76775000  | #Ti |
| 9.75255000  | 0.76264000  | 5.34835000  | #Ti |
| 11.22365000 | 4.00748000  | 5.56077000  | #Ti |
| 9.75750000  | 4.03701000  | 2.37231000  | #Ti |
| 11.23732000 | 0.78891000  | 1.98378000  | #Ti |
| 9.76893000  | 10.50527000 | 15.12233000 | #Ti |
| 11.21777000 | 7.25689000  | 15.53175000 | #Ti |
| 9.75265000  | 7.24800000  | 12.13689000 | #Ti |
| 11.25492000 | 10.49992000 | 11.92498000 | #Ti |
| 9.71368000  | 10.52297000 | 8.74144000  | #Ti |
| 11.10686000 | 7.27247000  | 8.75202000  | #Ti |
| 9.75361000  | 7.26160000  | 5.32203000  | #Ti |
| 11.24429000 | 10.50390000 | 5.56715000  | #Ti |
| 9.75900000  | 10.53228000 | 2.37538000  | #Ti |
| 11.23963000 | 7.28740000  | 1.96581000  | #Ti |

Rut-Lys-Z

1.000000000

11.834800 0.000000 0.000000

0.000000 12.992946 0.000000

0.000000 0.000000 30.000000

H C N O Ti

14 6 2 162 80

Cartesian

|            |            |             |    |
|------------|------------|-------------|----|
| 7.17165000 | 3.82223000 | 20.43753000 | #H |
| 7.50953000 | 5.36724000 | 21.19716000 | #H |
| 5.14898000 | 5.09040000 | 21.00479000 | #H |
| 5.58993000 | 6.43814000 | 19.96962000 | #H |
| 5.36600000 | 5.11232000 | 17.95865000 | #H |
| 5.35560000 | 3.60879000 | 18.85587000 | #H |
| 3.02092000 | 4.22981000 | 19.68787000 | #H |
| 3.07779000 | 5.61076000 | 18.55067000 | #H |
| 3.58224000 | 2.78386000 | 17.77855000 | #H |
| 9.19492000 | 5.09437000 | 19.64534000 | #H |
| 8.92618000 | 6.89046000 | 18.01641000 | #H |
| 7.29255000 | 6.83689000 | 18.05194000 | #H |
| 8.11413000 | 7.30264000 | 19.49303000 | #H |
| 2.17551000 | 3.55569000 | 17.58675000 | #H |
| 7.13892000 | 4.90965000 | 20.26466000 | #C |
| 5.66931000 | 5.34222000 | 20.06533000 | #C |
| 5.00400000 | 4.65271000 | 18.87960000 | #C |
| 3.49507000 | 4.61703000 | 18.76850000 | #C |
| 8.23594000 | 4.38969000 | 17.89000000 | #C |
| 8.20221000 | 5.22121000 | 19.19218000 | #C |
| 3.18257000 | 3.72050000 | 17.62005000 | #N |
| 8.12652000 | 6.64115000 | 18.71279000 | #N |
| 9.38121000 | 4.20031000 | 17.37817000 | #O |
| 7.13317000 | 4.06997000 | 17.35496000 | #O |
| 3.64801000 | 0.83666000 | 16.62917000 | #O |
| 5.12886000 | 5.25877000 | 15.49403000 | #O |
| 5.13080000 | 2.79443000 | 15.47280000 | #O |
| 3.66867000 | 0.73899000 | 14.04643000 | #O |

|             |            |             |    |
|-------------|------------|-------------|----|
| 3.63761000  | 4.05381000 | 13.38547000 | #O |
| 5.13143000  | 2.08160000 | 12.08419000 | #O |
| 5.13518000  | 6.01091000 | 12.09919000 | #O |
| 3.67655000  | 4.04677000 | 10.79099000 | #O |
| 3.66081000  | 0.78518000 | 10.06557000 | #O |
| 5.13875000  | 5.29660000 | 8.77186000  | #O |
| 5.13114000  | 2.78647000 | 8.77838000  | #O |
| 3.65977000  | 0.78474000 | 7.46150000  | #O |
| 3.65171000  | 4.04517000 | 6.77981000  | #O |
| 5.13332000  | 2.08582000 | 5.46772000  | #O |
| 5.13471000  | 5.99144000 | 5.45863000  | #O |
| 3.65047000  | 4.03570000 | 4.20445000  | #O |
| 3.65180000  | 0.77399000 | 3.48760000  | #O |
| 5.12995000  | 5.25025000 | 2.03818000  | #O |
| 5.13090000  | 2.80848000 | 2.05593000  | #O |
| 3.65015000  | 0.78421000 | 0.90734000  | #O |
| 6.62737000  | 0.82466000 | 16.61754000 | #O |
| 8.10417000  | 5.28673000 | 15.24344000 | #O |
| 8.13665000  | 2.75456000 | 15.26796000 | #O |
| 6.59518000  | 0.72695000 | 14.04302000 | #O |
| 6.59656000  | 4.02371000 | 13.38629000 | #O |
| 8.09448000  | 2.07452000 | 12.09449000 | #O |
| 8.08783000  | 6.00731000 | 12.10648000 | #O |
| 6.61342000  | 4.04789000 | 10.81843000 | #O |
| 6.61843000  | 0.78716000 | 10.06522000 | #O |
| 8.08367000  | 5.29771000 | 8.76509000  | #O |
| 8.08645000  | 2.78732000 | 8.77224000  | #O |
| 6.61990000  | 0.78517000 | 7.45947000  | #O |
| 6.61068000  | 4.04087000 | 6.78174000  | #O |
| 8.09220000  | 2.08568000 | 5.46714000  | #O |
| 8.09115000  | 5.99138000 | 5.45438000  | #O |
| 6.61135000  | 4.03633000 | 4.20421000  | #O |
| 6.61533000  | 0.77194000 | 3.48568000  | #O |
| 8.08778000  | 5.25068000 | 2.02945000  | #O |
| 8.08769000  | 2.80972000 | 2.05056000  | #O |
| 6.60784000  | 0.78254000 | 0.90540000  | #O |
| 9.57167000  | 0.81598000 | 16.61671000 | #O |
| 11.08881000 | 5.28101000 | 15.40574000 | #O |
| 11.08774000 | 2.80057000 | 15.43535000 | #O |
| 9.59899000  | 0.71852000 | 14.03722000 | #O |
| 9.61664000  | 4.03873000 | 13.32990000 | #O |
| 11.05688000 | 2.08126000 | 12.05235000 | #O |
| 11.05397000 | 6.00942000 | 12.06055000 | #O |
| 9.53323000  | 4.04997000 | 10.77653000 | #O |
| 9.57547000  | 0.78476000 | 10.06329000 | #O |
| 11.03776000 | 5.29568000 | 8.76801000  | #O |
| 11.04351000 | 2.78616000 | 8.77369000  | #O |
| 9.57748000  | 0.78545000 | 7.46003000  | #O |
| 9.56908000  | 4.04224000 | 6.77495000  | #O |
| 11.04901000 | 2.08759000 | 5.46284000  | #O |
| 11.04328000 | 5.99019000 | 5.46011000  | #O |
| 9.56694000  | 4.03836000 | 4.19812000  | #O |
| 9.57104000  | 0.77210000 | 3.48393000  | #O |
| 11.04815000 | 5.24861000 | 2.02540000  | #O |
| 11.04802000 | 2.80730000 | 2.05434000  | #O |

|             |             |             |    |
|-------------|-------------|-------------|----|
| 9.56673000  | 0.78411000  | 0.90380000  | #O |
| 3.66881000  | 7.26146000  | 16.68560000 | #O |
| 5.13381000  | 11.74290000 | 15.53988000 | #O |
| 5.13129000  | 9.31416000  | 15.55406000 | #O |
| 3.62968000  | 7.30726000  | 14.09753000 | #O |
| 3.65672000  | 10.52980000 | 13.35577000 | #O |
| 5.12182000  | 8.58897000  | 12.06513000 | #O |
| 5.13091000  | 12.47312000 | 12.04065000 | #O |
| 3.64935000  | 10.52490000 | 10.76727000 | #O |
| 3.66157000  | 7.28441000  | 10.03087000 | #O |
| 5.12941000  | 11.77992000 | 8.76388000  | #O |
| 5.13562000  | 9.27148000  | 8.76357000  | #O |
| 3.65986000  | 7.28630000  | 7.44999000  | #O |
| 3.65129000  | 10.51734000 | 6.76050000  | #O |
| 5.13437000  | 8.58212000  | 5.44000000  | #O |
| 5.13151000  | 12.47602000 | 5.47086000  | #O |
| 3.64789000  | 10.53110000 | 4.18521000  | #O |
| 3.65289000  | 7.27840000  | 3.45440000  | #O |
| 5.12926000  | 11.73960000 | 2.02822000  | #O |
| 5.12926000  | 9.29922000  | 2.02529000  | #O |
| 3.64682000  | 7.27334000  | 0.86944000  | #O |
| 6.65400000  | 7.22672000  | 16.65366000 | #O |
| 8.09184000  | 11.73506000 | 15.52944000 | #O |
| 8.09388000  | 9.30739000  | 15.50855000 | #O |
| 6.58059000  | 7.35237000  | 14.08326000 | #O |
| 6.60726000  | 10.53311000 | 13.35096000 | #O |
| 8.08829000  | 8.59684000  | 12.06313000 | #O |
| 8.09263000  | 12.47585000 | 12.05064000 | #O |
| 6.60947000  | 10.52664000 | 10.76930000 | #O |
| 6.63222000  | 7.28747000  | 10.07631000 | #O |
| 8.08889000  | 11.77857000 | 8.76488000  | #O |
| 8.08573000  | 9.27048000  | 8.75414000  | #O |
| 6.61487000  | 7.28795000  | 7.46358000  | #O |
| 6.60774000  | 10.52164000 | 6.76045000  | #O |
| 8.09069000  | 8.57872000  | 5.44342000  | #O |
| 8.09220000  | 12.47381000 | 5.47131000  | #O |
| 6.61188000  | 10.53314000 | 4.18414000  | #O |
| 6.61411000  | 7.27855000  | 3.44372000  | #O |
| 8.08883000  | 11.73844000 | 2.02533000  | #O |
| 8.08771000  | 9.29770000  | 2.02329000  | #O |
| 6.60391000  | 7.27101000  | 0.85912000  | #O |
| 9.53918000  | 7.23890000  | 16.63446000 | #O |
| 11.05190000 | 11.74330000 | 15.52820000 | #O |
| 11.05725000 | 9.31666000  | 15.54171000 | #O |
| 9.59845000  | 7.35583000  | 14.06386000 | #O |
| 9.57489000  | 10.53531000 | 13.34806000 | #O |
| 11.05917000 | 8.59068000  | 12.05525000 | #O |
| 11.05648000 | 12.47280000 | 12.03350000 | #O |
| 9.56661000  | 10.52607000 | 10.76723000 | #O |
| 9.55139000  | 7.28931000  | 10.07348000 | #O |
| 11.04698000 | 11.77914000 | 8.76260000  | #O |
| 11.03995000 | 9.27158000  | 8.76215000  | #O |
| 9.56045000  | 7.28544000  | 7.46748000  | #O |
| 9.56762000  | 10.51935000 | 6.76067000  | #O |
| 11.04404000 | 8.58060000  | 5.44513000  | #O |



|             |             |             |     |
|-------------|-------------|-------------|-----|
| 11.05108000 | 12.47562000 | 5.47016000  | #O  |
| 9.56715000  | 10.52883000 | 4.18350000  | #O  |
| 9.56846000  | 7.27838000  | 3.44189000  | #O  |
| 11.04644000 | 11.73984000 | 2.02889000  | #O  |
| 11.04707000 | 9.29954000  | 2.01912000  | #O  |
| 9.56986000  | 7.27209000  | 0.85715000  | #O  |
| 0.70691000  | 0.80180000  | 16.62247000 | #O  |
| 2.13712000  | 5.26950000  | 15.48336000 | #O  |
| 2.12908000  | 2.77835000  | 15.35263000 | #O  |
| 0.68905000  | 0.73557000  | 14.03558000 | #O  |
| 0.69062000  | 4.05184000  | 13.28065000 | #O  |
| 2.17715000  | 2.08114000  | 12.07383000 | #O  |
| 2.17446000  | 6.00764000  | 12.07174000 | #O  |
| 0.70869000  | 4.04581000  | 10.75974000 | #O  |
| 0.70402000  | 0.78243000  | 10.05837000 | #O  |
| 2.17414000  | 5.29239000  | 8.76795000  | #O  |
| 2.17840000  | 2.78707000  | 8.76548000  | #O  |
| 0.70270000  | 0.78773000  | 7.45525000  | #O  |
| 0.69046000  | 4.04353000  | 6.77107000  | #O  |
| 2.17403000  | 2.08948000  | 5.46972000  | #O  |
| 2.17130000  | 5.99082000  | 5.45651000  | #O  |
| 0.69346000  | 4.03872000  | 4.19908000  | #O  |
| 0.69899000  | 0.77332000  | 3.48649000  | #O  |
| 2.17201000  | 5.25063000  | 2.03402000  | #O  |
| 2.17096000  | 2.81002000  | 2.04989000  | #O  |
| 0.69125000  | 0.78323000  | 0.90666000  | #O  |
| 0.68250000  | 7.27188000  | 16.68734000 | #O  |
| 2.17871000  | 11.74707000 | 15.51681000 | #O  |
| 2.17609000  | 9.31479000  | 15.54246000 | #O  |
| 0.71535000  | 7.32686000  | 14.08759000 | #O  |
| 0.69119000  | 10.53328000 | 13.35181000 | #O  |
| 2.17508000  | 8.59212000  | 12.06934000 | #O  |
| 2.17861000  | 12.47448000 | 12.05268000 | #O  |
| 0.69675000  | 10.52709000 | 10.76566000 | #O  |
| 0.68335000  | 7.28853000  | 10.03490000 | #O  |
| 2.17139000  | 11.77882000 | 8.76097000  | #O  |
| 2.16922000  | 9.27485000  | 8.75866000  | #O  |
| 0.68561000  | 7.28280000  | 7.45892000  | #O  |
| 0.68937000  | 10.51900000 | 6.76081000  | #O  |
| 2.17049000  | 8.57855000  | 5.44905000  | #O  |
| 2.17412000  | 12.47435000 | 5.47346000  | #O  |
| 0.69272000  | 10.52824000 | 4.18468000  | #O  |
| 0.68843000  | 7.27729000  | 3.45410000  | #O  |
| 2.17056000  | 11.73868000 | 2.02523000  | #O  |
| 2.17085000  | 9.29849000  | 2.02846000  | #O  |
| 0.69645000  | 7.27690000  | 0.86751000  | #O  |
| 3.65843000  | 4.07463000  | 15.35777000 | #Ti |
| 5.13810000  | 0.76558000  | 15.52767000 | #Ti |
| 3.63825000  | 0.80449000  | 12.17512000 | #Ti |
| 5.12924000  | 4.04698000  | 12.13579000 | #Ti |
| 3.63819000  | 4.03924000  | 8.82747000  | #Ti |
| 4.99241000  | 0.79159000  | 8.77078000  | #Ti |
| 3.65409000  | 0.81385000  | 5.35710000  | #Ti |
| 5.13876000  | 4.06496000  | 5.61019000  | #Ti |
| 3.65076000  | 4.02749000  | 2.39876000  | #Ti |

|             |             |             |     |
|-------------|-------------|-------------|-----|
| 5.12656000  | 0.78181000  | 1.99491000  | #Ti |
| 6.65951000  | 3.96277000  | 15.34221000 | #Ti |
| 8.10158000  | 0.76010000  | 15.51709000 | #Ti |
| 6.62211000  | 0.82367000  | 12.17397000 | #Ti |
| 8.08113000  | 4.11508000  | 12.12931000 | #Ti |
| 6.58874000  | 4.03107000  | 8.91015000  | #Ti |
| 7.95100000  | 0.79018000  | 8.75987000  | #Ti |
| 6.60504000  | 0.80364000  | 5.35704000  | #Ti |
| 8.07729000  | 4.05265000  | 5.60816000  | #Ti |
| 6.60923000  | 4.02880000  | 2.39674000  | #Ti |
| 8.08472000  | 0.78076000  | 1.99419000  | #Ti |
| 9.60596000  | 4.04264000  | 15.27984000 | #Ti |
| 11.05795000 | 0.77920000  | 15.52793000 | #Ti |
| 9.55810000  | 0.81916000  | 12.17642000 | #Ti |
| 11.00700000 | 4.05386000  | 11.95658000 | #Ti |
| 9.53931000  | 4.03911000  | 8.81679000  | #Ti |
| 10.90742000 | 0.79103000  | 8.76914000  | #Ti |
| 9.56442000  | 0.80718000  | 5.35626000  | #Ti |
| 11.04387000 | 4.06801000  | 5.58498000  | #Ti |
| 9.56706000  | 4.02746000  | 2.39236000  | #Ti |
| 11.04186000 | 0.78094000  | 1.99373000  | #Ti |
| 3.65272000  | 10.52968000 | 15.17247000 | #Ti |
| 5.20298000  | 7.28160000  | 15.59404000 | #Ti |
| 3.66325000  | 7.30664000  | 12.28632000 | #Ti |
| 5.12551000  | 10.58888000 | 11.97126000 | #Ti |
| 3.60824000  | 10.52820000 | 8.77137000  | #Ti |
| 5.04518000  | 7.27812000  | 8.66012000  | #Ti |
| 3.64177000  | 7.30324000  | 5.31978000  | #Ti |
| 5.12717000  | 10.55068000 | 5.56355000  | #Ti |
| 3.64988000  | 10.52258000 | 2.37165000  | #Ti |
| 5.12187000  | 7.27038000  | 1.95302000  | #Ti |
| 6.61495000  | 10.50881000 | 15.16483000 | #Ti |
| 8.10627000  | 7.26917000  | 15.18195000 | #Ti |
| 6.58234000  | 7.32456000  | 11.94048000 | #Ti |
| 8.08666000  | 10.55248000 | 11.97540000 | #Ti |
| 6.56746000  | 10.53263000 | 8.77589000  | #Ti |
| 8.07306000  | 7.27672000  | 8.64897000  | #Ti |
| 6.60909000  | 7.29764000  | 5.28816000  | #Ti |
| 8.08526000  | 10.55549000 | 5.56828000  | #Ti |
| 6.60909000  | 10.52347000 | 2.37111000  | #Ti |
| 8.08566000  | 7.26995000  | 1.93390000  | #Ti |
| 9.57417000  | 10.51473000 | 15.16183000 | #Ti |
| 11.01324000 | 7.28215000  | 15.58774000 | #Ti |
| 9.59460000  | 7.33022000  | 11.93449000 | #Ti |
| 11.04800000 | 10.58963000 | 11.96755000 | #Ti |
| 9.52690000  | 10.52463000 | 8.77467000  | #Ti |
| 11.10381000 | 7.27500000  | 8.65132000  | #Ti |
| 9.56464000  | 7.29913000  | 5.28440000  | #Ti |
| 11.04310000 | 10.55369000 | 5.56308000  | #Ti |
| 9.56740000  | 10.52118000 | 2.37031000  | #Ti |
| 11.05137000 | 7.27008000  | 1.94661000  | #Ti |
| 0.69968000  | 4.03083000  | 15.07005000 | #Ti |
| 2.17236000  | 0.79579000  | 15.50883000 | #Ti |
| 0.70357000  | 0.81361000  | 12.16507000 | #Ti |
| 2.21370000  | 4.08925000  | 11.99183000 | #Ti |

|            |             |             |     |
|------------|-------------|-------------|-----|
| 0.67359000 | 4.02771000  | 8.81874000  | #Ti |
| 2.03519000 | 0.79171000  | 8.75376000  | #Ti |
| 0.68230000 | 0.81380000  | 5.35598000  | #Ti |
| 2.17305000 | 4.05448000  | 5.59383000  | #Ti |
| 0.69203000 | 4.02859000  | 2.39026000  | #Ti |
| 2.16681000 | 0.78148000  | 1.99581000  | #Ti |
| 0.69572000 | 10.53591000 | 15.16875000 | #Ti |
| 2.17979000 | 7.29180000  | 15.62771000 | #Ti |
| 0.68162000 | 7.30598000  | 12.27395000 | #Ti |
| 2.16886000 | 10.53276000 | 11.97221000 | #Ti |
| 0.65030000 | 10.53275000 | 8.76981000  | #Ti |
| 2.15695000 | 7.27686000  | 8.89757000  | #Ti |
| 0.69861000 | 7.30683000  | 5.31662000  | #Ti |
| 2.16772000 | 10.57380000 | 5.56585000  | #Ti |
| 0.69151000 | 10.52241000 | 2.37080000  | #Ti |
| 2.17040000 | 7.27027000  | 1.96593000  | #Ti |

#### Rut-Lys-D

1.000000000

11.834800 0.000000 0.000000

0.000000 12.992946 0.000000

0.000000 0.000000 30.000000

H C N O Ti

14 6 2 162 80

Cartesian

|            |            |             |    |
|------------|------------|-------------|----|
| 7.12758000 | 3.71623000 | 20.44617000 | #H |
| 7.50534000 | 5.22896000 | 21.25128000 | #H |
| 5.15679000 | 5.13315000 | 21.03402000 | #H |
| 5.67533000 | 6.39828000 | 19.92875000 | #H |
| 5.41379000 | 4.97265000 | 18.00083000 | #H |
| 5.28701000 | 3.52450000 | 18.97726000 | #H |
| 2.95783000 | 4.31057000 | 19.66352000 | #H |
| 3.15783000 | 5.65824000 | 18.50327000 | #H |
| 3.59865000 | 2.81406000 | 17.77803000 | #H |
| 9.20582000 | 4.85931000 | 19.71889000 | #H |
| 9.28007000 | 6.97102000 | 17.57914000 | #H |
| 7.47972000 | 6.91120000 | 18.48001000 | #H |
| 8.56054000 | 7.12895000 | 19.72704000 | #H |
| 2.18070000 | 3.56498000 | 17.59084000 | #H |
| 7.13943000 | 4.80924000 | 20.29935000 | #C |
| 5.69323000 | 5.30706000 | 20.08642000 | #C |
| 5.00157000 | 4.59050000 | 18.93294000 | #C |
| 3.49988000 | 4.64665000 | 18.76255000 | #C |
| 8.24102000 | 4.40184000 | 17.90922000 | #C |
| 8.24328000 | 5.13659000 | 19.26368000 | #C |
| 3.18566000 | 3.74422000 | 17.61550000 | #N |
| 8.35552000 | 6.56911000 | 18.89805000 | #N |
| 9.37654000 | 4.22171000 | 17.35873000 | #O |
| 7.13758000 | 4.11126000 | 17.34899000 | #O |
| 3.64630000 | 0.84624000 | 16.61470000 | #O |
| 5.12271000 | 5.27873000 | 15.49813000 | #O |
| 5.12976000 | 2.81104000 | 15.47138000 | #O |
| 3.66333000 | 0.75019000 | 14.03282000 | #O |
| 3.63581000 | 4.06189000 | 13.38422000 | #O |

|             |            |             |    |
|-------------|------------|-------------|----|
| 5.12652000  | 2.08497000 | 12.07313000 | #O |
| 5.12989000  | 6.01574000 | 12.08475000 | #O |
| 3.67398000  | 4.04996000 | 10.78979000 | #O |
| 3.65908000  | 0.78451000 | 10.05667000 | #O |
| 5.13020000  | 5.29807000 | 8.76756000  | #O |
| 5.12817000  | 2.78775000 | 8.77704000  | #O |
| 3.65636000  | 0.78801000 | 7.44894000  | #O |
| 3.64932000  | 4.04019000 | 6.77657000  | #O |
| 5.13126000  | 2.08442000 | 5.45652000  | #O |
| 5.12855000  | 5.98893000 | 5.44925000  | #O |
| 3.65083000  | 4.03502000 | 4.19958000  | #O |
| 3.65133000  | 0.77317000 | 3.47003000  | #O |
| 5.13161000  | 5.24758000 | 2.03134000  | #O |
| 5.13191000  | 2.80713000 | 2.05023000  | #O |
| 3.65318000  | 0.78573000 | 0.88816000  | #O |
| 6.62521000  | 0.83374000 | 16.59781000 | #O |
| 8.10384000  | 5.30805000 | 15.22363000 | #O |
| 8.13497000  | 2.77253000 | 15.27096000 | #O |
| 6.59185000  | 0.73971000 | 14.02773000 | #O |
| 6.59330000  | 4.03440000 | 13.38718000 | #O |
| 8.08839000  | 2.08379000 | 12.08085000 | #O |
| 8.08303000  | 6.01541000 | 12.09066000 | #O |
| 6.60937000  | 4.05390000 | 10.81756000 | #O |
| 6.61573000  | 0.78469000 | 10.05801000 | #O |
| 8.08122000  | 5.29852000 | 8.76640000  | #O |
| 8.07821000  | 2.78727000 | 8.77033000  | #O |
| 6.61336000  | 0.78860000 | 7.45007000  | #O |
| 6.60933000  | 4.03984000 | 6.77868000  | #O |
| 8.09131000  | 2.08251000 | 5.45826000  | #O |
| 8.09087000  | 5.98726000 | 5.45327000  | #O |
| 6.61086000  | 4.03601000 | 4.20126000  | #O |
| 6.61333000  | 0.77322000 | 3.47116000  | #O |
| 8.08870000  | 5.24904000 | 2.03246000  | #O |
| 8.08970000  | 2.80835000 | 2.04444000  | #O |
| 6.61130000  | 0.78628000 | 0.88968000  | #O |
| 9.56902000  | 0.82586000 | 16.60095000 | #O |
| 11.08917000 | 5.30364000 | 15.38751000 | #O |
| 11.08596000 | 2.81992000 | 15.43882000 | #O |
| 9.59146000  | 0.73537000 | 14.02252000 | #O |
| 9.61152000  | 4.04436000 | 13.32748000 | #O |
| 11.05310000 | 2.08493000 | 12.03769000 | #O |
| 11.04941000 | 6.01402000 | 12.05827000 | #O |
| 9.52943000  | 4.05341000 | 10.77360000 | #O |
| 9.57104000  | 0.78188000 | 10.05379000 | #O |
| 11.03906000 | 5.29517000 | 8.76502000  | #O |
| 11.03963000 | 2.78629000 | 8.77076000  | #O |
| 9.57360000  | 0.78942000 | 7.44844000  | #O |
| 9.56857000  | 4.03731000 | 6.77349000  | #O |
| 11.04900000 | 2.08557000 | 5.45265000  | #O |
| 11.04389000 | 5.98748000 | 5.45407000  | #O |
| 9.56723000  | 4.03441000 | 4.19610000  | #O |
| 9.56986000  | 0.77296000 | 3.46994000  | #O |
| 11.04878000 | 5.24734000 | 2.03047000  | #O |
| 11.04921000 | 2.80737000 | 2.04419000  | #O |
| 9.56915000  | 0.78635000 | 0.88866000  | #O |

|             |             |             |    |
|-------------|-------------|-------------|----|
| 3.65531000  | 7.28383000  | 16.65977000 | #O |
| 5.12948000  | 11.75395000 | 15.52158000 | #O |
| 5.12719000  | 9.32401000  | 15.53765000 | #O |
| 3.62716000  | 7.32374000  | 14.07706000 | #O |
| 3.65277000  | 10.53219000 | 13.34279000 | #O |
| 5.12129000  | 8.59543000  | 12.04233000 | #O |
| 5.12816000  | 12.47805000 | 12.03454000 | #O |
| 3.64543000  | 10.53497000 | 10.75636000 | #O |
| 3.65820000  | 7.28879000  | 10.04681000 | #O |
| 5.12966000  | 11.78207000 | 8.74898000  | #O |
| 5.12911000  | 9.27234000  | 8.75464000  | #O |
| 3.63939000  | 7.28702000  | 7.44680000  | #O |
| 3.64975000  | 10.52415000 | 6.74863000  | #O |
| 5.12931000  | 8.58039000  | 5.43483000  | #O |
| 5.13166000  | 12.47278000 | 5.45401000  | #O |
| 3.64656000  | 10.52648000 | 4.17087000  | #O |
| 3.65009000  | 7.28088000  | 3.44816000  | #O |
| 5.13076000  | 11.73982000 | 2.01418000  | #O |
| 5.12929000  | 9.29892000  | 2.01077000  | #O |
| 3.64830000  | 7.26828000  | 0.86665000  | #O |
| 6.66771000  | 7.25599000  | 16.59717000 | #O |
| 8.08986000  | 11.74669000 | 15.51025000 | #O |
| 8.08859000  | 9.31696000  | 15.47972000 | #O |
| 6.56476000  | 7.35583000  | 14.05536000 | #O |
| 6.60377000  | 10.53940000 | 13.33749000 | #O |
| 8.08280000  | 8.59851000  | 12.04344000 | #O |
| 8.08864000  | 12.48068000 | 12.04012000 | #O |
| 6.60610000  | 10.53319000 | 10.75673000 | #O |
| 6.61839000  | 7.28668000  | 10.05759000 | #O |
| 8.08470000  | 11.78306000 | 8.74923000  | #O |
| 8.08473000  | 9.27330000  | 8.75134000  | #O |
| 6.61055000  | 7.28818000  | 7.44029000  | #O |
| 6.60647000  | 10.52021000 | 6.74759000  | #O |
| 8.09007000  | 8.57922000  | 5.44203000  | #O |
| 8.09051000  | 12.47332000 | 5.45838000  | #O |
| 6.61044000  | 10.52556000 | 4.17036000  | #O |
| 6.61395000  | 7.28062000  | 3.44331000  | #O |
| 8.08824000  | 11.73981000 | 2.01307000  | #O |
| 8.08922000  | 9.29885000  | 2.00771000  | #O |
| 6.60773000  | 7.26733000  | 0.85884000  | #O |
| 9.55039000  | 7.25584000  | 16.62552000 | #O |
| 11.04560000 | 11.75343000 | 15.51371000 | #O |
| 11.05318000 | 9.32313000  | 15.50649000 | #O |
| 9.57996000  | 7.37491000  | 14.03621000 | #O |
| 9.56886000  | 10.53828000 | 13.33208000 | #O |
| 11.05670000 | 8.59998000  | 12.04374000 | #O |
| 11.05187000 | 12.47846000 | 12.02923000 | #O |
| 9.56306000  | 10.53459000 | 10.75447000 | #O |
| 9.58051000  | 7.29209000  | 10.07054000 | #O |
| 11.04498000 | 11.78206000 | 8.74726000  | #O |
| 11.04277000 | 9.27503000  | 8.75498000  | #O |
| 9.56086000  | 7.28447000  | 7.47086000  | #O |
| 9.56563000  | 10.52380000 | 6.74820000  | #O |
| 11.04248000 | 8.57888000  | 5.44285000  | #O |
| 11.05015000 | 12.47302000 | 5.45486000  | #O |

|             |             |             |     |
|-------------|-------------|-------------|-----|
| 9.56517000  | 10.52599000 | 4.17012000  | #O  |
| 9.56551000  | 7.28029000  | 3.44583000  | #O  |
| 11.04825000 | 11.74010000 | 2.01302000  | #O  |
| 11.04667000 | 9.29890000  | 2.01098000  | #O  |
| 9.57277000  | 7.26360000  | 0.86353000  | #O  |
| 0.70367000  | 0.80961000  | 16.60637000 | #O  |
| 2.13507000  | 5.28774000  | 15.47084000 | #O  |
| 2.12823000  | 2.79166000  | 15.35083000 | #O  |
| 0.68567000  | 0.74700000  | 14.02229000 | #O  |
| 0.68856000  | 4.05142000  | 13.27620000 | #O  |
| 2.17497000  | 2.08770000  | 12.05999000 | #O  |
| 2.17091000  | 6.01249000  | 12.06967000 | #O  |
| 0.70495000  | 4.05181000  | 10.75814000 | #O  |
| 0.70196000  | 0.78322000  | 10.05303000 | #O  |
| 2.17178000  | 5.29352000  | 8.76426000  | #O  |
| 2.17315000  | 2.78716000  | 8.76560000  | #O  |
| 0.69643000  | 0.79192000  | 7.44763000  | #O  |
| 0.69094000  | 4.03798000  | 6.76756000  | #O  |
| 2.17402000  | 2.08421000  | 5.45812000  | #O  |
| 2.17167000  | 5.98653000  | 5.45289000  | #O  |
| 0.69374000  | 4.03610000  | 4.19523000  | #O  |
| 0.69596000  | 0.77406000  | 3.47005000  | #O  |
| 2.17254000  | 5.24908000  | 2.03347000  | #O  |
| 2.17386000  | 2.80819000  | 2.04391000  | #O  |
| 0.69366000  | 0.78787000  | 0.88882000  | #O  |
| 0.67959000  | 7.29203000  | 16.64400000 | #O  |
| 2.17743000  | 11.75923000 | 15.50062000 | #O  |
| 2.16795000  | 9.32593000  | 15.52338000 | #O  |
| 0.68046000  | 7.33409000  | 14.06122000 | #O  |
| 0.68965000  | 10.54299000 | 13.33784000 | #O  |
| 2.17119000  | 8.59586000  | 12.06014000 | #O  |
| 2.17497000  | 12.47860000 | 12.04245000 | #O  |
| 0.69570000  | 10.53249000 | 10.75423000 | #O  |
| 0.68864000  | 7.29320000  | 10.05375000 | #O  |
| 2.16787000  | 11.78549000 | 8.74756000  | #O  |
| 2.16965000  | 9.28015000  | 8.74957000  | #O  |
| 0.69514000  | 7.28462000  | 7.45547000  | #O  |
| 0.68784000  | 10.52221000 | 6.74757000  | #O  |
| 2.17136000  | 8.58047000  | 5.44336000  | #O  |
| 2.17240000  | 12.47411000 | 5.45840000  | #O  |
| 0.69196000  | 10.52583000 | 4.17152000  | #O  |
| 0.68936000  | 7.27990000  | 3.45542000  | #O  |
| 2.17058000  | 11.73942000 | 2.01124000  | #O  |
| 2.17109000  | 9.29951000  | 2.01218000  | #O  |
| 0.69534000  | 7.26906000  | 0.86666000  | #O  |
| 3.65923000  | 4.09255000  | 15.35865000 | #Ti |
| 5.13396000  | 0.77790000  | 15.51243000 | #Ti |
| 3.64322000  | 0.80431000  | 12.15559000 | #Ti |
| 5.12682000  | 4.06206000  | 12.14297000 | #Ti |
| 3.62511000  | 4.02922000  | 8.82355000  | #Ti |
| 4.98820000  | 0.79454000  | 8.75026000  | #Ti |
| 3.64724000  | 0.80822000  | 5.33795000  | #Ti |
| 5.13762000  | 4.05066000  | 5.60909000  | #Ti |
| 3.65280000  | 4.02768000  | 2.39408000  | #Ti |
| 5.13225000  | 0.78234000  | 1.97734000  | #Ti |

|             |             |             |     |
|-------------|-------------|-------------|-----|
| 6.66477000  | 3.96391000  | 15.36369000 | #Ti |
| 8.10124000  | 0.77234000  | 15.49890000 | #Ti |
| 6.60644000  | 0.82761000  | 12.15864000 | #Ti |
| 8.07641000  | 4.08872000  | 12.13484000 | #Ti |
| 6.57422000  | 4.05063000  | 8.91281000  | #Ti |
| 7.94276000  | 0.79190000  | 8.75219000  | #Ti |
| 6.60891000  | 0.80147000  | 5.33962000  | #Ti |
| 8.07484000  | 4.05747000  | 5.60406000  | #Ti |
| 6.61080000  | 4.02730000  | 2.39306000  | #Ti |
| 8.09069000  | 0.78216000  | 1.97869000  | #Ti |
| 9.60850000  | 4.07618000  | 15.30191000 | #Ti |
| 11.05495000 | 0.79580000  | 15.51452000 | #Ti |
| 9.56363000  | 0.82228000  | 12.15764000 | #Ti |
| 10.99551000 | 4.06766000  | 11.95532000 | #Ti |
| 9.52301000  | 4.02381000  | 8.81283000  | #Ti |
| 10.90303000 | 0.79295000  | 8.75001000  | #Ti |
| 9.55964000  | 0.80371000  | 5.34022000  | #Ti |
| 11.04255000 | 4.04988000  | 5.58313000  | #Ti |
| 9.56867000  | 4.02755000  | 2.39042000  | #Ti |
| 11.04810000 | 0.78273000  | 1.97658000  | #Ti |
| 3.64920000  | 10.53796000 | 15.15731000 | #Ti |
| 5.17084000  | 7.29510000  | 15.55512000 | #Ti |
| 3.65605000  | 7.30908000  | 12.21193000 | #Ti |
| 5.12168000  | 10.57648000 | 11.95665000 | #Ti |
| 3.59354000  | 10.55036000 | 8.75679000  | #Ti |
| 4.96504000  | 7.27964000  | 8.73793000  | #Ti |
| 3.64764000  | 7.29856000  | 5.30668000  | #Ti |
| 5.12361000  | 10.55501000 | 5.55025000  | #Ti |
| 3.64968000  | 10.52268000 | 2.35664000  | #Ti |
| 5.12801000  | 7.26905000  | 1.94679000  | #Ti |
| 6.61137000  | 10.53211000 | 15.14961000 | #Ti |
| 8.00394000  | 7.27571000  | 15.23191000 | #Ti |
| 6.59673000  | 7.32103000  | 11.91156000 | #Ti |
| 8.08162000  | 10.57840000 | 11.95483000 | #Ti |
| 6.55151000  | 10.51345000 | 8.75617000  | #Ti |
| 8.02305000  | 7.27916000  | 8.60173000  | #Ti |
| 6.60068000  | 7.29421000  | 5.29617000  | #Ti |
| 8.08195000  | 10.54193000 | 5.55078000  | #Ti |
| 6.60918000  | 10.52044000 | 2.35605000  | #Ti |
| 8.08946000  | 7.26851000  | 1.93962000  | #Ti |
| 9.56803000  | 10.51821000 | 15.14406000 | #Ti |
| 11.11216000 | 7.30185000  | 15.50217000 | #Ti |
| 9.57134000  | 7.33449000  | 12.11357000 | #Ti |
| 11.04324000 | 10.57604000 | 11.94983000 | #Ti |
| 9.51181000  | 10.54710000 | 8.75452000  | #Ti |
| 10.95966000 | 7.27641000  | 8.81222000  | #Ti |
| 9.56896000  | 7.29334000  | 5.28920000  | #Ti |
| 11.04018000 | 10.55809000 | 5.54881000  | #Ti |
| 9.56779000  | 10.52254000 | 2.35551000  | #Ti |
| 11.05652000 | 7.26839000  | 1.95203000  | #Ti |
| 0.70312000  | 4.03327000  | 15.06197000 | #Ti |
| 2.17186000  | 0.80861000  | 15.49338000 | #Ti |
| 0.68971000  | 0.81314000  | 12.14842000 | #Ti |
| 2.20932000  | 4.06205000  | 11.97915000 | #Ti |
| 0.65917000  | 4.04421000  | 8.81314000  | #Ti |

|            |             |             |     |
|------------|-------------|-------------|-----|
| 2.02836000 | 0.79736000  | 8.74512000  | #Ti |
| 0.69060000 | 0.80770000  | 5.33652000  | #Ti |
| 2.17220000 | 4.06120000  | 5.58632000  | #Ti |
| 0.69378000 | 4.02696000  | 2.38668000  | #Ti |
| 2.17354000 | 0.78240000  | 1.97583000  | #Ti |
| 0.69143000 | 10.56389000 | 15.15131000 | #Ti |
| 2.20808000 | 7.30893000  | 15.55602000 | #Ti |
| 0.69432000 | 7.30345000  | 12.17093000 | #Ti |
| 2.16470000 | 10.55350000 | 11.95755000 | #Ti |
| 0.63719000 | 10.51806000 | 8.75236000  | #Ti |
| 2.05066000 | 7.27888000  | 8.73055000  | #Ti |
| 0.68516000 | 7.30116000  | 5.32796000  | #Ti |
| 2.16512000 | 10.55344000 | 5.55149000  | #Ti |
| 0.69162000 | 10.52062000 | 2.35692000  | #Ti |
| 2.17156000 | 7.26890000  | 1.96195000  | #Ti |

Rut-Lys-C

1.000000000

11.834800 0.000000 0.000000

0.000000 12.992946 0.000000

0.000000 0.000000 30.000000

H C N O Ti

14 6 2 162 80

Cartesian

|            |             |             |    |
|------------|-------------|-------------|----|
| 6.05011000 | 3.31587000  | 17.92064000 | #H |
| 7.62421000 | 3.66141000  | 17.94146000 | #H |
| 7.01850000 | 3.43829000  | 21.34095000 | #H |
| 4.41458000 | 4.75174000  | 19.16278000 | #H |
| 4.63004000 | 5.71811000  | 17.69862000 | #H |
| 4.92985000 | 6.78504000  | 20.56118000 | #H |
| 3.46645000 | 6.82603000  | 19.60105000 | #H |
| 5.59596000 | 8.79037000  | 19.70495000 | #H |
| 5.58258000 | 8.15595000  | 18.06971000 | #H |
| 3.32402000 | 9.56496000  | 19.57988000 | #H |
| 2.96676000 | 8.58409000  | 18.14705000 | #H |
| 3.49731000 | 11.14555000 | 18.01657000 | #H |
| 5.03223000 | 10.64580000 | 17.92609000 | #H |
| 7.06353000 | 6.06482000  | 18.34384000 | #H |
| 6.46947000 | 5.20915000  | 18.68554000 | #C |
| 6.91468000 | 4.87739000  | 20.10461000 | #C |
| 4.96983000 | 5.60407000  | 18.73289000 | #C |
| 4.56470000 | 6.87400000  | 19.52793000 | #C |
| 4.96321000 | 8.27520000  | 18.96437000 | #C |
| 3.74808000 | 9.16943000  | 18.64251000 | #C |
| 6.71175000 | 4.07714000  | 17.72672000 | #N |
| 4.07131000 | 10.34124000 | 17.74127000 | #N |
| 7.29655000 | 5.70022000  | 20.91623000 | #O |
| 6.76891000 | 3.54956000  | 20.39974000 | #O |
| 0.92201000 | 0.78153000  | 16.65290000 | #O |
| 2.39964000 | 5.23294000  | 15.50050000 | #O |
| 2.37824000 | 2.79754000  | 15.49324000 | #O |
| 0.92336000 | 0.77098000  | 14.07092000 | #O |
| 0.91761000 | 4.05415000  | 13.32887000 | #O |
| 2.39651000 | 2.09140000  | 12.07679000 | #O |



|            |            |             |    |
|------------|------------|-------------|----|
| 2.39265000 | 5.98429000 | 12.01844000 | #O |
| 0.90779000 | 4.02994000 | 10.75574000 | #O |
| 0.92422000 | 0.79964000 | 10.08287000 | #O |
| 2.39825000 | 5.30348000 | 8.77416000  | #O |
| 2.39437000 | 2.79603000 | 8.76668000  | #O |
| 0.92333000 | 0.79889000 | 7.47020000  | #O |
| 0.91514000 | 4.06353000 | 6.76402000  | #O |
| 2.39507000 | 2.10446000 | 5.47799000  | #O |
| 2.39426000 | 6.00042000 | 5.44679000  | #O |
| 0.91135000 | 4.04894000 | 4.19387000  | #O |
| 0.91357000 | 0.80814000 | 3.49296000  | #O |
| 2.39316000 | 5.27925000 | 2.04013000  | #O |
| 2.39423000 | 2.83825000 | 2.04441000  | #O |
| 0.91253000 | 0.80715000 | 0.91136000  | #O |
| 3.88158000 | 0.77900000 | 16.65733000 | #O |
| 5.30330000 | 5.26995000 | 15.40909000 | #O |
| 5.33594000 | 2.81199000 | 15.50444000 | #O |
| 3.87894000 | 0.78695000 | 14.07499000 | #O |
| 3.85444000 | 4.03564000 | 13.32959000 | #O |
| 5.35959000 | 2.08948000 | 12.09770000 | #O |
| 5.35782000 | 5.98766000 | 12.03546000 | #O |
| 3.89549000 | 4.02912000 | 10.77632000 | #O |
| 3.88584000 | 0.80352000 | 10.09089000 | #O |
| 5.35390000 | 5.30508000 | 8.77417000  | #O |
| 5.35710000 | 2.79632000 | 8.76820000  | #O |
| 3.88013000 | 0.79918000 | 7.47603000  | #O |
| 3.86959000 | 4.06061000 | 6.77092000  | #O |
| 5.35205000 | 2.10376000 | 5.48413000  | #O |
| 5.35253000 | 6.00122000 | 5.45280000  | #O |
| 3.87457000 | 4.05101000 | 4.19755000  | #O |
| 3.87475000 | 0.80815000 | 3.49278000  | #O |
| 5.35091000 | 5.27946000 | 2.04056000  | #O |
| 5.35066000 | 2.83862000 | 2.04450000  | #O |
| 3.87104000 | 0.80611000 | 0.91104000  | #O |
| 6.83323000 | 0.82364000 | 16.65380000 | #O |
| 8.34746000 | 5.27680000 | 15.49485000 | #O |
| 8.32615000 | 2.82920000 | 15.52712000 | #O |
| 6.83812000 | 0.77031000 | 14.07350000 | #O |
| 6.83510000 | 4.05664000 | 13.39825000 | #O |
| 8.31557000 | 2.09224000 | 12.09947000 | #O |
| 8.33057000 | 5.99147000 | 12.04764000 | #O |
| 6.83584000 | 4.02939000 | 10.79579000 | #O |
| 6.84287000 | 0.80167000 | 10.08882000 | #O |
| 8.31023000 | 5.30297000 | 8.77325000  | #O |
| 8.30680000 | 2.79504000 | 8.76611000  | #O |
| 6.83748000 | 0.79515000 | 7.47493000  | #O |
| 6.82848000 | 4.06167000 | 6.77820000  | #O |
| 8.31183000 | 2.10383000 | 5.48341000  | #O |
| 8.30895000 | 6.00148000 | 5.45562000  | #O |
| 6.82927000 | 4.04823000 | 4.20091000  | #O |
| 6.83076000 | 0.80926000 | 3.49379000  | #O |
| 8.30990000 | 5.27912000 | 2.04498000  | #O |
| 8.31032000 | 2.83852000 | 2.04709000  | #O |
| 6.83028000 | 0.80734000 | 0.91173000  | #O |
| 0.93810000 | 7.27552000 | 16.60024000 | #O |

|            |             |             |    |
|------------|-------------|-------------|----|
| 2.40538000 | 11.73413000 | 15.55672000 | #O |
| 2.35811000 | 9.28798000  | 15.47959000 | #O |
| 0.90902000 | 7.26169000  | 14.02073000 | #O |
| 0.90995000 | 10.54829000 | 13.35655000 | #O |
| 2.38676000 | 8.58773000  | 12.04931000 | #O |
| 2.39948000 | 12.49004000 | 12.09151000 | #O |
| 0.93816000 | 10.55079000 | 10.78840000 | #O |
| 0.92047000 | 7.29216000  | 10.05138000 | #O |
| 2.39934000 | 11.79736000 | 8.77921000  | #O |
| 2.39660000 | 9.28907000  | 8.77409000  | #O |
| 0.92202000 | 7.29647000  | 7.44870000  | #O |
| 0.91130000 | 10.54325000 | 6.77799000  | #O |
| 2.39644000 | 8.59772000  | 5.46181000  | #O |
| 2.39514000 | 12.49478000 | 5.47560000  | #O |
| 0.91440000 | 10.55035000 | 4.20285000  | #O |
| 0.91201000 | 7.30539000  | 3.46786000  | #O |
| 2.39242000 | 11.77237000 | 2.05308000  | #O |
| 2.39266000 | 9.33196000  | 2.04429000  | #O |
| 0.90906000 | 7.30493000  | 0.88531000  | #O |
| 3.89127000 | 7.29716000  | 16.47882000 | #O |
| 5.37535000 | 11.74654000 | 15.55350000 | #O |
| 5.42820000 | 9.29519000  | 15.40940000 | #O |
| 3.86708000 | 7.28493000  | 13.96349000 | #O |
| 3.87886000 | 10.51638000 | 13.40883000 | #O |
| 5.36733000 | 8.59073000  | 12.04526000 | #O |
| 5.35655000 | 12.49062000 | 12.08901000 | #O |
| 3.87541000 | 10.54863000 | 10.80477000 | #O |
| 3.88825000 | 7.30272000  | 10.04918000 | #O |
| 5.34773000 | 11.79699000 | 8.77983000  | #O |
| 5.35320000 | 9.28941000  | 8.77095000  | #O |
| 3.87616000 | 7.29433000  | 7.44823000  | #O |
| 3.87142000 | 10.54360000 | 6.78357000  | #O |
| 5.35215000 | 8.59832000  | 5.46378000  | #O |
| 5.35194000 | 12.49520000 | 5.47473000  | #O |
| 3.87201000 | 10.55172000 | 4.20733000  | #O |
| 3.87487000 | 7.30346000  | 3.46207000  | #O |
| 5.35001000 | 11.77308000 | 2.05485000  | #O |
| 5.34920000 | 9.33271000  | 2.03993000  | #O |
| 3.86861000 | 7.30759000  | 0.87935000  | #O |
| 6.80993000 | 7.26875000  | 16.52748000 | #O |
| 8.33934000 | 11.77184000 | 15.51365000 | #O |
| 8.31646000 | 9.33378000  | 15.49852000 | #O |
| 6.86581000 | 7.28058000  | 13.98388000 | #O |
| 6.85777000 | 10.56423000 | 13.33630000 | #O |
| 8.32333000 | 8.59760000  | 12.03878000 | #O |
| 8.32417000 | 12.49180000 | 12.07148000 | #O |
| 6.81429000 | 10.54915000 | 10.78143000 | #O |
| 6.85231000 | 7.29303000  | 10.05776000 | #O |
| 8.31283000 | 11.79741000 | 8.77824000  | #O |
| 8.31090000 | 9.29105000  | 8.76835000  | #O |
| 6.83105000 | 7.29795000  | 7.45833000  | #O |
| 6.83129000 | 10.54622000 | 6.77657000  | #O |
| 8.31126000 | 8.59844000  | 5.46505000  | #O |
| 8.31114000 | 12.49473000 | 5.47223000  | #O |
| 6.82758000 | 10.54873000 | 4.20144000  | #O |

|             |             |             |     |
|-------------|-------------|-------------|-----|
| 6.82900000  | 7.30624000  | 3.46581000  | #O  |
| 8.30862000  | 11.77279000 | 2.05239000  | #O  |
| 8.30857000  | 9.33255000  | 2.03922000  | #O  |
| 6.83070000  | 7.30514000  | 0.88284000  | #O  |
| 9.79485000  | 0.80619000  | 16.65524000 | #O  |
| 11.27186000 | 5.25400000  | 15.50167000 | #O  |
| 11.27810000 | 2.81389000  | 15.50012000 | #O  |
| 9.79761000  | 0.79863000  | 14.07239000 | #O  |
| 9.80322000  | 4.04784000  | 13.34649000 | #O  |
| 11.27762000 | 2.09545000  | 12.08383000 | #O  |
| 11.26733000 | 5.98950000  | 12.04002000 | #O  |
| 9.77180000  | 4.02917000  | 10.77984000 | #O  |
| 9.80090000  | 0.80689000  | 10.08537000 | #O  |
| 11.26694000 | 5.30250000  | 8.76962000  | #O  |
| 11.27127000 | 2.79645000  | 8.76129000  | #O  |
| 9.79628000  | 0.79694000  | 7.47445000  | #O  |
| 9.78955000  | 4.05985000  | 6.77200000  | #O  |
| 11.27057000 | 2.10378000  | 5.48265000  | #O  |
| 11.26862000 | 6.00078000  | 5.45497000  | #O  |
| 9.78768000  | 4.05008000  | 4.20033000  | #O  |
| 9.79228000  | 0.80837000  | 3.49343000  | #O  |
| 11.26672000 | 5.27861000  | 2.04134000  | #O  |
| 11.26699000 | 2.83838000  | 2.04287000  | #O  |
| 9.78808000  | 0.80627000  | 0.91167000  | #O  |
| 9.78485000  | 7.29330000  | 16.61489000 | #O  |
| 11.26935000 | 11.75921000 | 15.51532000 | #O  |
| 11.28057000 | 9.31799000  | 15.49831000 | #O  |
| 9.80420000  | 7.29932000  | 14.03700000 | #O  |
| 9.79675000  | 10.53702000 | 13.33645000 | #O  |
| 11.27909000 | 8.59389000  | 12.05070000 | #O  |
| 11.27284000 | 12.48961000 | 12.07758000 | #O  |
| 9.80064000  | 10.55155000 | 10.76240000 | #O  |
| 9.79978000  | 7.30037000  | 10.05703000 | #O  |
| 11.27092000 | 11.79792000 | 8.77562000  | #O  |
| 11.27407000 | 9.29207000  | 8.77082000  | #O  |
| 9.79248000  | 7.29749000  | 7.45922000  | #O  |
| 9.78838000  | 10.54765000 | 6.76905000  | #O  |
| 11.26877000 | 8.59850000  | 5.46510000  | #O  |
| 11.26906000 | 12.49440000 | 5.47268000  | #O  |
| 9.78920000  | 10.54910000 | 4.19974000  | #O  |
| 9.78949000  | 7.30381000  | 3.47042000  | #O  |
| 11.26841000 | 11.77232000 | 2.05146000  | #O  |
| 11.26755000 | 9.33253000  | 2.04023000  | #O  |
| 9.78830000  | 7.30557000  | 0.88553000  | #O  |
| 0.90791000  | 4.04147000  | 15.13264000 | #Ti |
| 2.39952000  | 0.76309000  | 15.55502000 | #Ti |
| 0.91388000  | 0.76990000  | 12.19481000 | #Ti |
| 2.39787000  | 4.00522000  | 11.92951000 | #Ti |
| 0.85966000  | 4.05265000  | 8.75151000  | #Ti |
| 2.24519000  | 0.80292000  | 8.77284000  | #Ti |
| 0.90816000  | 0.77087000  | 5.36194000  | #Ti |
| 2.39446000  | 4.01425000  | 5.56863000  | #Ti |
| 0.91221000  | 4.05733000  | 2.38322000  | #Ti |
| 2.38974000  | 0.80894000  | 1.99853000  | #Ti |
| 3.86095000  | 3.96863000  | 15.13137000 | #Ti |

|             |             |             |     |
|-------------|-------------|-------------|-----|
| 5.35604000  | 0.77904000  | 15.54289000 | #Ti |
| 3.87210000  | 0.76408000  | 12.18773000 | #Ti |
| 5.38755000  | 4.00277000  | 12.04549000 | #Ti |
| 3.82474000  | 4.04574000  | 8.79887000  | #Ti |
| 5.20485000  | 0.80059000  | 8.77728000  | #Ti |
| 3.86828000  | 0.77329000  | 5.35992000  | #Ti |
| 5.34805000  | 4.02055000  | 5.58681000  | #Ti |
| 3.87219000  | 4.05822000  | 2.38431000  | #Ti |
| 5.34884000  | 0.80919000  | 1.99847000  | #Ti |
| 6.82354000  | 4.12836000  | 15.37787000 | #Ti |
| 8.31661000  | 0.81623000  | 15.55451000 | #Ti |
| 6.83201000  | 0.75882000  | 12.18690000 | #Ti |
| 8.26518000  | 4.02068000  | 12.06004000 | #Ti |
| 6.78082000  | 4.05101000  | 8.80374000  | #Ti |
| 8.16435000  | 0.79852000  | 8.77463000  | #Ti |
| 6.82416000  | 0.77878000  | 5.36094000  | #Ti |
| 8.30487000  | 4.01730000  | 5.59002000  | #Ti |
| 6.82991000  | 4.05759000  | 2.39020000  | #Ti |
| 8.30826000  | 0.80902000  | 1.99975000  | #Ti |
| 0.91502000  | 10.56071000 | 15.16267000 | #Ti |
| 2.38301000  | 7.22673000  | 15.44445000 | #Ti |
| 0.90494000  | 7.27388000  | 12.14043000 | #Ti |
| 2.43687000  | 10.50412000 | 12.06890000 | #Ti |
| 0.86974000  | 10.54885000 | 8.81574000  | #Ti |
| 2.25199000  | 7.29544000  | 8.73665000  | #Ti |
| 0.90888000  | 7.26637000  | 5.33413000  | #Ti |
| 2.38928000  | 10.51176000 | 5.59464000  | #Ti |
| 0.91273000  | 10.55284000 | 2.39002000  | #Ti |
| 2.38724000  | 7.30669000  | 1.96933000  | #Ti |
| 3.88131000  | 10.41893000 | 15.41871000 | #Ti |
| 5.35820000  | 7.28687000  | 15.34583000 | #Ti |
| 3.86494000  | 7.24464000  | 12.06624000 | #Ti |
| 5.30522000  | 10.49891000 | 12.06793000 | #Ti |
| 3.82228000  | 10.54487000 | 8.81402000  | #Ti |
| 5.22613000  | 7.29765000  | 8.71047000  | #Ti |
| 3.86665000  | 7.27417000  | 5.31986000  | #Ti |
| 5.34562000  | 10.51485000 | 5.59450000  | #Ti |
| 3.87085000  | 10.55330000 | 2.39655000  | #Ti |
| 5.34702000  | 7.30675000  | 1.96377000  | #Ti |
| 6.85515000  | 10.60252000 | 15.13855000 | #Ti |
| 8.31669000  | 7.33455000  | 15.48865000 | #Ti |
| 6.83263000  | 7.26978000  | 12.08089000 | #Ti |
| 8.30101000  | 10.51768000 | 11.93250000 | #Ti |
| 6.77685000  | 10.54903000 | 8.81426000  | #Ti |
| 8.19379000  | 7.29961000  | 8.73532000  | #Ti |
| 6.82518000  | 7.27269000  | 5.32141000  | #Ti |
| 8.29737000  | 10.51283000 | 5.57534000  | #Ti |
| 6.82843000  | 10.55286000 | 2.38861000  | #Ti |
| 8.30961000  | 7.30691000  | 1.97079000  | #Ti |
| 9.79722000  | 4.02557000  | 15.15209000 | #Ti |
| 11.27337000 | 0.79261000  | 15.56334000 | #Ti |
| 9.78787000  | 0.78777000  | 12.19616000 | #Ti |
| 11.25348000 | 4.02018000  | 11.94019000 | #Ti |
| 9.73365000  | 4.04435000  | 8.80967000  | #Ti |
| 11.12216000 | 0.80050000  | 8.78066000  | #Ti |

|             |             |             |     |
|-------------|-------------|-------------|-----|
| 9.78270000  | 0.77023000  | 5.36341000  | #Ti |
| 11.25616000 | 4.01185000  | 5.57336000  | #Ti |
| 9.78791000  | 4.05794000  | 2.38668000  | #Ti |
| 11.26595000 | 0.80890000  | 2.00007000  | #Ti |
| 9.80452000  | 10.53070000 | 15.13965000 | #Ti |
| 11.27205000 | 7.28821000  | 15.54192000 | #Ti |
| 9.78912000  | 7.27607000  | 12.16543000 | #Ti |
| 11.28226000 | 10.52748000 | 11.94666000 | #Ti |
| 9.74234000  | 10.54703000 | 8.75675000  | #Ti |
| 11.13429000 | 7.29867000  | 8.76521000  | #Ti |
| 9.78478000  | 7.26960000  | 5.33500000  | #Ti |
| 11.27195000 | 10.50886000 | 5.57727000  | #Ti |
| 9.78813000  | 10.55298000 | 2.38910000  | #Ti |
| 11.26574000 | 7.30658000  | 1.97742000  | #Ti |

Rut-His-D

1.000000000

11.834800 0.000000 0.000000

0.000000 12.992946 0.000000

0.000000 0.000000 30.000000

H C N O Ti

9 6 3 162 80

Cartesian

|            |            |             |    |
|------------|------------|-------------|----|
| 6.84954000 | 3.29176000 | 20.31660000 | #H |
| 6.50593000 | 4.84924000 | 21.04981000 | #H |
| 4.44889000 | 6.25146000 | 19.88522000 | #H |
| 5.22734000 | 2.52880000 | 18.08267000 | #H |
| 2.70858000 | 5.90543000 | 18.09184000 | #H |
| 8.71930000 | 4.71623000 | 19.95259000 | #H |
| 8.53239000 | 6.78767000 | 18.70047000 | #H |
| 6.78878000 | 6.97783000 | 17.57388000 | #H |
| 7.56233000 | 6.89402000 | 20.02731000 | #H |
| 6.59286000 | 4.33343000 | 20.07763000 | #C |
| 5.28318000 | 4.34033000 | 19.35151000 | #C |
| 4.81297000 | 3.48205000 | 18.38509000 | #C |
| 3.50335000 | 5.21247000 | 18.32835000 | #C |
| 8.06195000 | 4.41028000 | 17.92893000 | #C |
| 7.83027000 | 4.95527000 | 19.34395000 | #C |
| 4.41031000 | 5.42077000 | 19.30567000 | #N |
| 3.75115000 | 4.05440000 | 17.70696000 | #N |
| 7.67511000 | 6.41513000 | 19.13039000 | #N |
| 9.23538000 | 4.23569000 | 17.47874000 | #O |
| 6.99774000 | 4.28131000 | 17.24310000 | #O |
| 3.69667000 | 0.84796000 | 16.62378000 | #O |
| 5.13211000 | 5.33137000 | 15.39961000 | #O |
| 5.17869000 | 2.84021000 | 15.44877000 | #O |
| 3.69287000 | 0.78666000 | 14.05098000 | #O |
| 3.67072000 | 4.04139000 | 13.40449000 | #O |
| 5.17105000 | 2.09317000 | 12.07647000 | #O |
| 5.17531000 | 6.02703000 | 12.09354000 | #O |
| 3.69740000 | 4.06626000 | 10.81115000 | #O |
| 3.69767000 | 0.78680000 | 10.07492000 | #O |
| 5.17218000 | 5.30365000 | 8.79193000  | #O |
| 5.16734000 | 2.79438000 | 8.79557000  | #O |

|             |             |             |    |
|-------------|-------------|-------------|----|
| 3.70353000  | 0.79541000  | 7.46802000  | #O |
| 3.69266000  | 4.05413000  | 6.79294000  | #O |
| 5.17455000  | 2.09603000  | 5.47782000  | #O |
| 5.17475000  | 6.00150000  | 5.45816000  | #O |
| 3.69212000  | 4.04502000  | 4.21624000  | #O |
| 3.69531000  | 0.78827000  | 3.49439000  | #O |
| 5.17095000  | 5.26887000  | 2.05327000  | #O |
| 5.17140000  | 2.82721000  | 2.06304000  | #O |
| 3.68919000  | 0.80446000  | 0.91368000  | #O |
| 6.64620000  | 0.86416000  | 16.62559000 | #O |
| 8.16431000  | 5.35154000  | 15.20017000 | #O |
| 8.13827000  | 2.81686000  | 15.32468000 | #O |
| 6.63746000  | 0.76255000  | 14.04457000 | #O |
| 6.63646000  | 4.05460000  | 13.36545000 | #O |
| 8.13116000  | 2.09177000  | 12.09612000 | #O |
| 8.14253000  | 6.02358000  | 12.12103000 | #O |
| 6.65478000  | 4.06051000  | 10.82445000 | #O |
| 6.65846000  | 0.78940000  | 10.07519000 | #O |
| 8.12793000  | 5.30509000  | 8.78047000  | #O |
| 8.12848000  | 2.79411000  | 8.78938000  | #O |
| 6.65869000  | 0.79722000  | 7.46859000  | #O |
| 6.64927000  | 4.05276000  | 6.79439000  | #O |
| 8.13147000  | 2.09688000  | 5.47792000  | #O |
| 8.12801000  | 6.00378000  | 5.46081000  | #O |
| 6.65087000  | 4.04694000  | 4.21660000  | #O |
| 6.65380000  | 0.78872000  | 3.49233000  | #O |
| 8.12648000  | 5.27013000  | 2.04972000  | #O |
| 8.12862000  | 2.82669000  | 2.06164000  | #O |
| 6.64832000  | 0.80244000  | 0.91213000  | #O |
| 9.59117000  | 0.84803000  | 16.62981000 | #O |
| 11.10601000 | 5.32685000  | 15.48732000 | #O |
| 11.11291000 | 2.85168000  | 15.50252000 | #O |
| 9.63698000  | 0.78007000  | 14.05232000 | #O |
| 9.65271000  | 4.03702000  | 13.36835000 | #O |
| 11.10028000 | 2.09427000  | 12.05918000 | #O |
| 11.09446000 | 6.02703000  | 12.09534000 | #O |
| 9.58779000  | 4.06686000  | 10.80141000 | #O |
| 9.61962000  | 0.78854000  | 10.07712000 | #O |
| 11.08248000 | 5.30387000  | 8.78331000  | #O |
| 11.08280000 | 2.79486000  | 8.79111000  | #O |
| 9.61532000  | 0.79563000  | 7.47188000  | #O |
| 9.60856000  | 4.05212000  | 6.79093000  | #O |
| 11.08966000 | 2.09601000  | 5.47770000  | #O |
| 11.08703000 | 6.00257000  | 5.46698000  | #O |
| 9.60998000  | 4.04824000  | 4.21416000  | #O |
| 9.61100000  | 0.78500000  | 3.49407000  | #O |
| 11.08852000 | 5.26786000  | 2.04523000  | #O |
| 11.08839000 | 2.82650000  | 2.06527000  | #O |
| 9.60921000  | 0.80508000  | 0.91386000  | #O |
| 3.70964000  | 7.36998000  | 16.61625000 | #O |
| 5.17054000  | 11.78382000 | 15.52221000 | #O |
| 5.17419000  | 9.35695000  | 15.51179000 | #O |
| 3.69962000  | 7.35835000  | 14.05295000 | #O |
| 3.69661000  | 10.54741000 | 13.34856000 | #O |
| 5.16911000  | 8.60831000  | 12.03595000 | #O |

|             |             |             |    |
|-------------|-------------|-------------|----|
| 5.16796000  | 12.48904000 | 12.05862000 | #O |
| 3.68309000  | 10.55217000 | 10.76792000 | #O |
| 3.69038000  | 7.29055000  | 10.06674000 | #O |
| 5.17222000  | 11.78863000 | 8.76321000  | #O |
| 5.17175000  | 9.28088000  | 8.78017000  | #O |
| 3.71087000  | 7.29509000  | 7.45561000  | #O |
| 3.69315000  | 10.52697000 | 6.76257000  | #O |
| 5.17431000  | 8.59228000  | 5.44933000  | #O |
| 5.17403000  | 12.48502000 | 5.47616000  | #O |
| 3.69127000  | 10.54017000 | 4.18684000  | #O |
| 3.69226000  | 7.30052000  | 3.45780000  | #O |
| 5.17167000  | 11.75659000 | 2.03154000  | #O |
| 5.17111000  | 9.31558000  | 2.02132000  | #O |
| 3.68908000  | 7.28463000  | 0.86871000  | #O |
| 6.65621000  | 7.27835000  | 16.63080000 | #O |
| 8.12835000  | 11.78778000 | 15.51076000 | #O |
| 8.12768000  | 9.35722000  | 15.50361000 | #O |
| 6.64919000  | 7.41067000  | 14.04537000 | #O |
| 6.64903000  | 10.55101000 | 13.33965000 | #O |
| 8.14582000  | 8.61769000  | 12.05242000 | #O |
| 8.13735000  | 12.49528000 | 12.06841000 | #O |
| 6.65499000  | 10.55323000 | 10.76836000 | #O |
| 6.69032000  | 7.29626000  | 10.08999000 | #O |
| 8.12861000  | 11.78720000 | 8.76246000  | #O |
| 8.13357000  | 9.27865000  | 8.76950000  | #O |
| 6.63944000  | 7.29439000  | 7.47611000  | #O |
| 6.65064000  | 10.52739000 | 6.76317000  | #O |
| 8.12803000  | 8.58970000  | 5.44867000  | #O |
| 8.13197000  | 12.48463000 | 5.47828000  | #O |
| 6.65178000  | 10.54213000 | 4.18438000  | #O |
| 6.65052000  | 7.30038000  | 3.44969000  | #O |
| 8.13011000  | 11.75635000 | 2.02895000  | #O |
| 8.12997000  | 9.31586000  | 2.01773000  | #O |
| 6.64521000  | 7.28854000  | 0.86566000  | #O |
| 9.53250000  | 7.29009000  | 16.63361000 | #O |
| 11.08811000 | 11.79420000 | 15.50738000 | #O |
| 11.09083000 | 9.36396000  | 15.57157000 | #O |
| 9.66191000  | 7.40670000  | 14.08657000 | #O |
| 9.61748000  | 10.55181000 | 13.35068000 | #O |
| 11.10376000 | 8.60423000  | 12.05796000 | #O |
| 11.09671000 | 12.48759000 | 12.06847000 | #O |
| 9.61535000  | 10.55189000 | 10.76895000 | #O |
| 9.62004000  | 7.29171000  | 10.08030000 | #O |
| 11.09017000 | 11.78766000 | 8.76021000  | #O |
| 11.08304000 | 9.27806000  | 8.77341000  | #O |
| 9.60146000  | 7.29489000  | 7.46912000  | #O |
| 9.60856000  | 10.52761000 | 6.76197000  | #O |
| 11.08802000 | 8.59084000  | 5.45482000  | #O |
| 11.09083000 | 12.48525000 | 5.47711000  | #O |
| 9.60875000  | 10.54076000 | 4.18510000  | #O |
| 9.60829000  | 7.29854000  | 3.44971000  | #O |
| 11.08908000 | 11.75555000 | 2.03148000  | #O |
| 11.08871000 | 9.31504000  | 2.02038000  | #O |
| 9.60866000  | 7.28476000  | 0.86214000  | #O |
| 0.72934000  | 0.81017000  | 16.64900000 | #O |

|            |             |             |     |
|------------|-------------|-------------|-----|
| 2.19620000 | 5.31061000  | 15.52382000 | #O  |
| 2.15727000 | 2.82849000  | 15.45684000 | #O  |
| 0.73019000 | 0.79752000  | 14.06186000 | #O  |
| 0.72599000 | 4.07473000  | 13.35030000 | #O  |
| 2.20889000 | 2.09429000  | 12.07615000 | #O  |
| 2.21437000 | 6.02188000  | 12.10144000 | #O  |
| 0.74262000 | 4.06384000  | 10.79869000 | #O  |
| 0.73922000 | 0.78569000  | 10.06707000 | #O  |
| 2.21232000 | 5.30082000  | 8.77617000  | #O  |
| 2.21514000 | 2.79400000  | 8.78728000  | #O  |
| 0.74466000 | 0.79955000  | 7.46222000  | #O  |
| 0.73129000 | 4.05205000  | 6.78949000  | #O  |
| 2.21484000 | 2.09850000  | 5.47771000  | #O  |
| 2.21031000 | 6.00328000  | 5.46354000  | #O  |
| 0.73229000 | 4.05097000  | 4.21546000  | #O  |
| 0.73701000 | 0.78791000  | 3.49475000  | #O  |
| 2.21078000 | 5.26974000  | 2.05334000  | #O  |
| 2.20947000 | 2.82763000  | 2.06187000  | #O  |
| 0.73095000 | 0.80068000  | 0.91515000  | #O  |
| 0.73751000 | 7.32421000  | 16.68572000 | #O  |
| 2.21238000 | 11.78536000 | 15.51368000 | #O  |
| 2.21103000 | 9.35988000  | 15.53217000 | #O  |
| 0.75685000 | 7.35193000  | 14.09584000 | #O  |
| 0.73067000 | 10.54176000 | 13.35658000 | #O  |
| 2.21382000 | 8.60863000  | 12.06159000 | #O  |
| 2.20979000 | 12.49186000 | 12.07717000 | #O  |
| 0.73586000 | 10.55104000 | 10.77051000 | #O  |
| 0.74149000 | 7.29181000  | 10.07416000 | #O  |
| 2.20989000 | 11.78676000 | 8.75807000  | #O  |
| 2.21266000 | 9.28062000  | 8.76799000  | #O  |
| 0.72642000 | 7.29351000  | 7.48376000  | #O  |
| 0.73164000 | 10.52740000 | 6.76260000  | #O  |
| 2.21003000 | 8.58961000  | 5.45192000  | #O  |
| 2.21588000 | 12.48453000 | 5.47894000  | #O  |
| 0.73355000 | 10.54099000 | 4.18527000  | #O  |
| 0.72720000 | 7.29627000  | 3.45679000  | #O  |
| 2.21325000 | 11.75565000 | 2.03056000  | #O  |
| 2.21236000 | 9.31551000  | 2.02287000  | #O  |
| 0.73542000 | 7.28891000  | 0.87091000  | #O  |
| 3.64301000 | 4.00061000  | 15.42302000 | #Ti |
| 5.16775000 | 0.80178000  | 15.51140000 | #Ti |
| 3.67610000 | 0.79125000  | 12.18283000 | #Ti |
| 5.15358000 | 4.01435000  | 12.13068000 | #Ti |
| 3.66754000 | 4.05322000  | 8.84199000  | #Ti |
| 5.02962000 | 0.80126000  | 8.77773000  | #Ti |
| 3.69408000 | 0.82428000  | 5.36608000  | #Ti |
| 5.17765000 | 4.07716000  | 5.62139000  | #Ti |
| 3.69109000 | 4.04507000  | 2.41287000  | #Ti |
| 5.16591000 | 0.80049000  | 2.00008000  | #Ti |
| 6.61968000 | 4.13184000  | 15.30000000 | #Ti |
| 8.11581000 | 0.83040000  | 15.52357000 | #Ti |
| 6.66374000 | 0.80501000  | 12.16518000 | #Ti |
| 8.13128000 | 4.08472000  | 12.13835000 | #Ti |
| 6.62141000 | 4.03547000  | 8.92352000  | #Ti |
| 7.99301000 | 0.79965000  | 8.75982000  | #Ti |



|             |             |             |     |
|-------------|-------------|-------------|-----|
| 6.64471000  | 0.81733000  | 5.36022000  | #Ti |
| 8.11801000  | 4.06412000  | 5.62250000  | #Ti |
| 6.64969000  | 4.04492000  | 2.40947000  | #Ti |
| 8.12657000  | 0.80034000  | 2.00042000  | #Ti |
| 9.57500000  | 4.04408000  | 15.36522000 | #Ti |
| 11.07920000 | 0.83561000  | 15.55324000 | #Ti |
| 9.58977000  | 0.80155000  | 12.19192000 | #Ti |
| 11.04011000 | 4.01907000  | 12.01900000 | #Ti |
| 9.57456000  | 4.05310000  | 8.83891000  | #Ti |
| 10.94841000 | 0.80004000  | 8.78753000  | #Ti |
| 9.60805000  | 0.82087000  | 5.36643000  | #Ti |
| 11.08745000 | 4.07907000  | 5.61049000  | #Ti |
| 9.60774000  | 4.04646000  | 2.41041000  | #Ti |
| 11.08504000 | 0.80078000  | 2.00533000  | #Ti |
| 3.69371000  | 10.56887000 | 15.16129000 | #Ti |
| 5.08654000  | 7.32040000  | 15.44071000 | #Ti |
| 3.68941000  | 7.30091000  | 12.13989000 | #Ti |
| 5.16731000  | 10.57224000 | 11.96005000 | #Ti |
| 3.63979000  | 10.53167000 | 8.76937000  | #Ti |
| 5.04999000  | 7.28617000  | 8.69248000  | #Ti |
| 3.68378000  | 7.31228000  | 5.32553000  | #Ti |
| 5.16816000  | 10.56123000 | 5.56527000  | #Ti |
| 3.69186000  | 10.53903000 | 2.37211000  | #Ti |
| 5.16486000  | 7.28650000  | 1.95803000  | #Ti |
| 6.65524000  | 10.55370000 | 15.15350000 | #Ti |
| 8.20919000  | 7.32827000  | 15.24907000 | #Ti |
| 6.62631000  | 7.30151000  | 12.09056000 | #Ti |
| 8.12931000  | 10.52544000 | 11.97118000 | #Ti |
| 6.59979000  | 10.54808000 | 8.77057000  | #Ti |
| 8.00617000  | 7.28580000  | 8.73086000  | #Ti |
| 6.64923000  | 7.31156000  | 5.29538000  | #Ti |
| 8.12686000  | 10.57087000 | 5.56580000  | #Ti |
| 6.65051000  | 10.53877000 | 2.37021000  | #Ti |
| 8.12710000  | 7.28767000  | 1.94349000  | #Ti |
| 9.60836000  | 10.58078000 | 15.16494000 | #Ti |
| 11.02813000 | 7.32547000  | 15.60772000 | #Ti |
| 9.63443000  | 7.31117000  | 11.93632000 | #Ti |
| 11.08710000 | 10.57777000 | 11.97171000 | #Ti |
| 9.56037000  | 10.52945000 | 8.77221000  | #Ti |
| 11.04557000 | 7.28077000  | 8.62814000  | #Ti |
| 9.60144000  | 7.31037000  | 5.29943000  | #Ti |
| 11.08454000 | 10.56118000 | 5.56569000  | #Ti |
| 9.60933000  | 10.53938000 | 2.37023000  | #Ti |
| 11.08873000 | 7.28657000  | 1.94960000  | #Ti |
| 0.70249000  | 4.11326000  | 15.15040000 | #Ti |
| 2.19745000  | 0.80807000  | 15.55395000 | #Ti |
| 0.73703000  | 0.80672000  | 12.19689000 | #Ti |
| 2.25153000  | 4.05719000  | 12.04789000 | #Ti |
| 0.70595000  | 4.03155000  | 8.87268000  | #Ti |
| 2.07076000  | 0.79951000  | 8.76791000  | #Ti |
| 0.72368000  | 0.82095000  | 5.36980000  | #Ti |
| 2.20769000  | 4.06340000  | 5.61430000  | #Ti |
| 0.73217000  | 4.04570000  | 2.40738000  | #Ti |
| 2.20689000  | 0.80016000  | 2.00534000  | #Ti |
| 0.72462000  | 10.57088000 | 15.17222000 | #Ti |

|            |             |             |     |
|------------|-------------|-------------|-----|
| 2.15412000 | 7.34192000  | 15.54711000 | #Ti |
| 0.71138000 | 7.29467000  | 12.23715000 | #Ti |
| 2.20598000 | 10.53071000 | 11.97446000 | #Ti |
| 0.68257000 | 10.54500000 | 8.77081000  | #Ti |
| 2.11113000 | 7.28263000  | 8.86660000  | #Ti |
| 0.73790000 | 7.31500000  | 5.30627000  | #Ti |
| 2.20891000 | 10.57922000 | 5.56656000  | #Ti |
| 0.73310000 | 10.53834000 | 2.37063000  | #Ti |
| 2.21539000 | 7.28674000  | 1.96179000  | #Ti |

Rut-His-Z

1.000000000

11.834800 0.000000 0.000000

0.000000 12.992946 0.000000

0.000000 0.000000 30.000000

H C N O Ti

9 6 3 162 80

Cartesian

|            |            |             |    |
|------------|------------|-------------|----|
| 6.93363000 | 3.98440000 | 20.77025000 | #H |
| 6.50314000 | 5.68018000 | 20.73958000 | #H |
| 5.31416000 | 2.34379000 | 19.86762000 | #H |
| 4.69202000 | 6.11884000 | 18.10142000 | #H |
| 3.58984000 | 2.05646000 | 18.04338000 | #H |
| 8.81682000 | 4.93725000 | 19.81855000 | #H |
| 8.81956000 | 6.71459000 | 18.12914000 | #H |
| 7.18803000 | 6.75788000 | 17.92282000 | #H |
| 7.88789000 | 7.17225000 | 19.48050000 | #H |
| 6.66006000 | 4.80470000 | 20.08862000 | #C |
| 5.39973000 | 4.43293000 | 19.36673000 | #C |
| 4.66618000 | 5.07994000 | 18.40138000 | #C |
| 4.04616000 | 2.99804000 | 18.33344000 | #C |
| 8.07846000 | 4.26527000 | 17.90797000 | #C |
| 7.91523000 | 5.08576000 | 19.20846000 | #C |
| 4.96011000 | 3.11789000 | 19.31667000 | #N |
| 3.86582000 | 4.17251000 | 17.72530000 | #N |
| 7.94809000 | 6.50184000 | 18.70956000 | #N |
| 9.25192000 | 4.14401000 | 17.45144000 | #O |
| 7.00457000 | 3.92609000 | 17.32358000 | #O |
| 3.68058000 | 0.71482000 | 16.60121000 | #O |
| 5.18594000 | 5.26280000 | 15.41336000 | #O |
| 5.12699000 | 2.77248000 | 15.43490000 | #O |
| 3.67904000 | 0.74866000 | 14.03453000 | #O |
| 3.65925000 | 4.04487000 | 13.40906000 | #O |
| 5.16008000 | 2.07295000 | 12.08085000 | #O |
| 5.16496000 | 6.00121000 | 12.09577000 | #O |
| 3.69152000 | 4.04045000 | 10.81203000 | #O |
| 3.68893000 | 0.77888000 | 10.06227000 | #O |
| 5.16654000 | 5.29406000 | 8.78886000  | #O |
| 5.15746000 | 2.78591000 | 8.78384000  | #O |
| 3.68986000 | 0.78770000 | 7.45930000  | #O |
| 3.68295000 | 4.05269000 | 6.79282000  | #O |
| 5.16302000 | 2.09511000 | 5.47268000  | #O |
| 5.16672000 | 6.00018000 | 5.45942000  | #O |
| 3.68406000 | 4.04567000 | 4.21527000  | #O |

|             |             |             |    |
|-------------|-------------|-------------|----|
| 3.68384000  | 0.78279000  | 3.48633000  | #O |
| 5.16477000  | 5.26491000  | 2.04825000  | #O |
| 5.16365000  | 2.82328000  | 2.06218000  | #O |
| 3.68327000  | 0.80038000  | 0.90553000  | #O |
| 6.63951000  | 0.82024000  | 16.60350000 | #O |
| 8.11009000  | 5.26599000  | 15.28948000 | #O |
| 8.16859000  | 2.73338000  | 15.24758000 | #O |
| 6.62725000  | 0.70428000  | 14.02883000 | #O |
| 6.63113000  | 4.00742000  | 13.37259000 | #O |
| 8.12762000  | 2.06685000  | 12.09743000 | #O |
| 8.12145000  | 5.99875000  | 12.10497000 | #O |
| 6.64027000  | 4.03891000  | 10.82323000 | #O |
| 6.64713000  | 0.78519000  | 10.06496000 | #O |
| 8.11460000  | 5.29706000  | 8.78447000  | #O |
| 8.12023000  | 2.78537000  | 8.77939000  | #O |
| 6.64842000  | 0.78749000  | 7.46032000  | #O |
| 6.64250000  | 4.05083000  | 6.79195000  | #O |
| 8.12162000  | 2.09494000  | 5.47231000  | #O |
| 8.12120000  | 6.00104000  | 5.45606000  | #O |
| 6.64170000  | 4.04649000  | 4.21482000  | #O |
| 6.64296000  | 0.78912000  | 3.48492000  | #O |
| 8.11982000  | 5.26624000  | 2.04840000  | #O |
| 8.12089000  | 2.82363000  | 2.05858000  | #O |
| 6.64232000  | 0.79885000  | 0.90517000  | #O |
| 9.58282000  | 0.78860000  | 16.62298000 | #O |
| 11.11541000 | 5.25410000  | 15.48078000 | #O |
| 11.09452000 | 2.78174000  | 15.48455000 | #O |
| 9.63244000  | 0.70059000  | 14.04177000 | #O |
| 9.64041000  | 4.04287000  | 13.36007000 | #O |
| 11.08289000 | 2.07342000  | 12.06379000 | #O |
| 11.08897000 | 6.00092000  | 12.07780000 | #O |
| 9.57845000  | 4.03875000  | 10.79513000 | #O |
| 9.60713000  | 0.77850000  | 10.06423000 | #O |
| 11.07202000 | 5.29409000  | 8.78416000  | #O |
| 11.07330000 | 2.78592000  | 8.77857000  | #O |
| 9.60470000  | 0.78687000  | 7.46173000  | #O |
| 9.59997000  | 4.05187000  | 6.78728000  | #O |
| 11.07952000 | 2.09560000  | 5.47144000  | #O |
| 11.07583000 | 5.99966000  | 5.45847000  | #O |
| 9.60025000  | 4.04327000  | 4.21078000  | #O |
| 9.60153000  | 0.78374000  | 3.48591000  | #O |
| 11.08194000 | 5.26452000  | 2.04768000  | #O |
| 11.08188000 | 2.82268000  | 2.06004000  | #O |
| 9.60106000  | 0.80060000  | 0.90535000  | #O |
| 3.70823000  | 7.27881000  | 16.64267000 | #O |
| 5.16998000  | 11.72889000 | 15.51234000 | #O |
| 5.15734000  | 9.30870000  | 15.52933000 | #O |
| 3.65842000  | 7.31238000  | 14.07412000 | #O |
| 3.68549000  | 10.52450000 | 13.34523000 | #O |
| 5.15381000  | 8.58238000  | 12.05269000 | #O |
| 5.15834000  | 12.46524000 | 12.03446000 | #O |
| 3.67430000  | 10.51885000 | 10.76329000 | #O |
| 3.68590000  | 7.28269000  | 10.03613000 | #O |
| 5.16347000  | 11.77941000 | 8.76383000  | #O |
| 5.16196000  | 9.27094000  | 8.76134000  | #O |

|             |             |             |    |
|-------------|-------------|-------------|----|
| 3.69319000  | 7.28222000  | 7.45319000  | #O |
| 3.68316000  | 10.53033000 | 6.75898000  | #O |
| 5.16525000  | 8.58993000  | 5.45042000  | #O |
| 5.16423000  | 12.48461000 | 5.46708000  | #O |
| 3.68191000  | 10.53705000 | 4.18484000  | #O |
| 3.68615000  | 7.29626000  | 3.45587000  | #O |
| 5.16393000  | 11.75381000 | 2.02933000  | #O |
| 5.16300000  | 9.31292000  | 2.01950000  | #O |
| 3.68092000  | 7.27990000  | 0.86943000  | #O |
| 6.65166000  | 7.21793000  | 16.64916000 | #O |
| 8.11675000  | 11.71982000 | 15.52640000 | #O |
| 8.12030000  | 9.28975000  | 15.50823000 | #O |
| 6.62738000  | 7.35588000  | 14.06760000 | #O |
| 6.63732000  | 10.52545000 | 13.33892000 | #O |
| 8.12630000  | 8.58781000  | 12.06181000 | #O |
| 8.12503000  | 12.46739000 | 12.04268000 | #O |
| 6.64143000  | 10.52032000 | 10.76375000 | #O |
| 6.66236000  | 7.28788000  | 10.07837000 | #O |
| 8.11760000  | 11.77840000 | 8.76435000  | #O |
| 8.12105000  | 9.26860000  | 8.76047000  | #O |
| 6.64313000  | 7.28474000  | 7.46888000  | #O |
| 6.64100000  | 10.53234000 | 6.75884000  | #O |
| 8.12077000  | 8.58851000  | 5.44992000  | #O |
| 8.12102000  | 12.48396000 | 5.46654000  | #O |
| 6.64158000  | 10.53717000 | 4.18205000  | #O |
| 6.64361000  | 7.29694000  | 3.44720000  | #O |
| 8.12160000  | 11.75309000 | 2.02735000  | #O |
| 8.12239000  | 9.31219000  | 2.01821000  | #O |
| 6.63905000  | 7.28761000  | 0.86211000  | #O |
| 9.54014000  | 7.21149000  | 16.66285000 | #O |
| 11.07848000 | 11.72900000 | 15.52084000 | #O |
| 11.07433000 | 9.29935000  | 15.54957000 | #O |
| 9.63116000  | 7.32671000  | 14.08980000 | #O |
| 9.60143000  | 10.52603000 | 13.34684000 | #O |
| 11.08563000 | 8.58194000  | 12.06750000 | #O |
| 11.09267000 | 12.46525000 | 12.04283000 | #O |
| 9.60137000  | 10.51865000 | 10.76580000 | #O |
| 9.59125000  | 7.28571000  | 10.07831000 | #O |
| 11.07992000 | 11.77947000 | 8.76234000  | #O |
| 11.07082000 | 9.27170000  | 8.75734000  | #O |
| 9.59078000  | 7.28091000  | 7.47197000  | #O |
| 9.59743000  | 10.53106000 | 6.75959000  | #O |
| 11.07695000 | 8.58924000  | 5.45396000  | #O |
| 11.08159000 | 12.48496000 | 5.46838000  | #O |
| 9.60025000  | 10.53685000 | 4.18330000  | #O |
| 9.59914000  | 7.29826000  | 3.44755000  | #O |
| 11.08138000 | 11.75375000 | 2.03012000  | #O |
| 11.08120000 | 9.31236000  | 2.01949000  | #O |
| 9.60457000  | 7.27940000  | 0.86288000  | #O |
| 0.72793000  | 0.75871000  | 16.63035000 | #O |
| 2.16018000  | 5.28171000  | 15.47359000 | #O |
| 2.19997000  | 2.80412000  | 15.54186000 | #O |
| 0.72800000  | 0.76845000  | 14.04895000 | #O |
| 0.72150000  | 4.01302000  | 13.35079000 | #O |
| 2.20314000  | 2.07246000  | 12.06831000 | #O |

|            |             |             |     |
|------------|-------------|-------------|-----|
| 2.19308000 | 5.99828000  | 12.08628000 | #O  |
| 0.73160000 | 4.03965000  | 10.79363000 | #O  |
| 0.73019000 | 0.78466000  | 10.06044000 | #O  |
| 2.20085000 | 5.29113000  | 8.78051000  | #O  |
| 2.20732000 | 2.78584000  | 8.77743000  | #O  |
| 0.73273000 | 0.78950000  | 7.45647000  | #O  |
| 0.72205000 | 4.05165000  | 6.78632000  | #O  |
| 2.20477000 | 2.09717000  | 5.47239000  | #O  |
| 2.20292000 | 6.00039000  | 5.45970000  | #O  |
| 0.72527000 | 4.04720000  | 4.21335000  | #O  |
| 0.72643000 | 0.78905000  | 3.48640000  | #O  |
| 2.20311000 | 5.26450000  | 2.05020000  | #O  |
| 2.20449000 | 2.82286000  | 2.06153000  | #O  |
| 0.72463000 | 0.79829000  | 0.90622000  | #O  |
| 0.71205000 | 7.28282000  | 16.69994000 | #O  |
| 2.19275000 | 11.73704000 | 15.48926000 | #O  |
| 2.20555000 | 9.31344000  | 15.54116000 | #O  |
| 0.73542000 | 7.31674000  | 14.10607000 | #O  |
| 0.71676000 | 10.51863000 | 13.35053000 | #O  |
| 2.19768000 | 8.58564000  | 12.07025000 | #O  |
| 2.19938000 | 12.46786000 | 12.05491000 | #O  |
| 0.72337000 | 10.51998000 | 10.76396000 | #O  |
| 0.71312000 | 7.29083000  | 10.03667000 | #O  |
| 2.19993000 | 11.77989000 | 8.76020000  | #O  |
| 2.20243000 | 9.27486000  | 8.75311000  | #O  |
| 0.71579000 | 7.28088000  | 7.46412000  | #O  |
| 0.72147000 | 10.53357000 | 6.75886000  | #O  |
| 2.20287000 | 8.58849000  | 5.45276000  | #O  |
| 2.20367000 | 12.48434000 | 5.46893000  | #O  |
| 0.72395000 | 10.53572000 | 4.18382000  | #O  |
| 0.72171000 | 7.29496000  | 3.45765000  | #O  |
| 2.20394000 | 11.75318000 | 2.02829000  | #O  |
| 2.20479000 | 9.31242000  | 2.02307000  | #O  |
| 0.72964000 | 7.28496000  | 0.87141000  | #O  |
| 3.65482000 | 4.12184000  | 15.42252000 | #Ti |
| 5.15733000 | 0.76009000  | 15.49012000 | #Ti |
| 3.66469000 | 0.79645000  | 12.16233000 | #Ti |
| 5.14105000 | 4.04188000  | 12.14697000 | #Ti |
| 3.66490000 | 4.03818000  | 8.85034000  | #Ti |
| 5.02256000 | 0.79108000  | 8.76458000  | #Ti |
| 3.68303000 | 0.82497000  | 5.35537000  | #Ti |
| 5.16787000 | 4.07545000  | 5.62282000  | #Ti |
| 3.68419000 | 4.04193000  | 2.41164000  | #Ti |
| 5.16276000 | 0.79611000  | 1.99386000  | #Ti |
| 6.62907000 | 3.93057000  | 15.30842000 | #Ti |
| 8.11584000 | 0.74549000  | 15.51016000 | #Ti |
| 6.64821000 | 0.81591000  | 12.15545000 | #Ti |
| 8.10969000 | 4.09760000  | 12.11596000 | #Ti |
| 6.61766000 | 4.02943000  | 8.91680000  | #Ti |
| 7.98363000 | 0.78960000  | 8.75660000  | #Ti |
| 6.63730000 | 0.81848000  | 5.35458000  | #Ti |
| 8.10962000 | 4.07051000  | 5.61668000  | #Ti |
| 6.64219000 | 4.04136000  | 2.40823000  | #Ti |
| 8.12199000 | 0.79608000  | 1.99543000  | #Ti |
| 9.58408000 | 4.02468000  | 15.30956000 | #Ti |

|             |             |             |     |
|-------------|-------------|-------------|-----|
| 11.07117000 | 0.76523000  | 15.54247000 | #Ti |
| 9.58809000  | 0.80142000  | 12.18332000 | #Ti |
| 11.03633000 | 4.03936000  | 12.00582000 | #Ti |
| 9.57211000  | 4.03812000  | 8.83150000  | #Ti |
| 10.93741000 | 0.79156000  | 8.77366000  | #Ti |
| 9.59512000  | 0.82133000  | 5.35874000  | #Ti |
| 11.07934000 | 4.07864000  | 5.60487000  | #Ti |
| 9.60079000  | 4.04177000  | 2.40708000  | #Ti |
| 11.07951000 | 0.79599000  | 1.99664000  | #Ti |
| 3.67949000  | 10.54296000 | 15.15930000 | #Ti |
| 5.22551000  | 7.29175000  | 15.53225000 | #Ti |
| 3.68916000  | 7.30167000  | 12.26337000 | #Ti |
| 5.15593000  | 10.57743000 | 11.96118000 | #Ti |
| 3.63736000  | 10.53147000 | 8.76869000  | #Ti |
| 5.06738000  | 7.27642000  | 8.67542000  | #Ti |
| 3.67644000  | 7.31284000  | 5.32357000  | #Ti |
| 5.15870000  | 10.56681000 | 5.56367000  | #Ti |
| 3.68343000  | 10.53602000 | 2.37143000  | #Ti |
| 5.15742000  | 7.28329000  | 1.95440000  | #Ti |
| 6.64454000  | 10.49319000 | 15.15170000 | #Ti |
| 8.14490000  | 7.24860000  | 15.20590000 | #Ti |
| 6.61785000  | 7.31471000  | 11.94931000 | #Ti |
| 8.11701000  | 10.54379000 | 11.97029000 | #Ti |
| 6.59748000  | 10.52837000 | 8.77114000  | #Ti |
| 8.09265000  | 7.27488000  | 8.64831000  | #Ti |
| 6.63924000  | 7.31226000  | 5.29077000  | #Ti |
| 8.11724000  | 10.56838000 | 5.56473000  | #Ti |
| 6.64235000  | 10.53449000 | 2.36921000  | #Ti |
| 8.12159000  | 7.28345000  | 1.93928000  | #Ti |
| 9.59917000  | 10.49952000 | 15.16196000 | #Ti |
| 11.02143000 | 7.25682000  | 15.62415000 | #Ti |
| 9.62301000  | 7.31489000  | 11.93230000 | #Ti |
| 11.07634000 | 10.57364000 | 11.97088000 | #Ti |
| 9.55743000  | 10.52716000 | 8.77426000  | #Ti |
| 11.12720000 | 7.27314000  | 8.66016000  | #Ti |
| 9.59854000  | 7.31186000  | 5.29073000  | #Ti |
| 11.07463000 | 10.56813000 | 5.56554000  | #Ti |
| 9.60130000  | 10.53559000 | 2.37019000  | #Ti |
| 11.08743000 | 7.28254000  | 1.95299000  | #Ti |
| 0.70711000  | 4.00087000  | 15.15330000 | #Ti |
| 2.18369000  | 0.78845000  | 15.51141000 | #Ti |
| 0.73161000  | 0.80655000  | 12.16697000 | #Ti |
| 2.23872000  | 4.07936000  | 12.04322000 | #Ti |
| 0.70352000  | 4.02635000  | 8.86143000  | #Ti |
| 2.06307000  | 0.79161000  | 8.75563000  | #Ti |
| 0.71457000  | 0.82477000  | 5.35797000  | #Ti |
| 2.20212000  | 4.06793000  | 5.61279000  | #Ti |
| 0.72549000  | 4.04069000  | 2.40641000  | #Ti |
| 2.20284000  | 0.79578000  | 1.99561000  | #Ti |
| 0.71587000  | 10.51593000 | 15.16664000 | #Ti |
| 2.18925000  | 7.30848000  | 15.62355000 | #Ti |
| 0.70705000  | 7.29508000  | 12.29247000 | #Ti |
| 2.19595000  | 10.52241000 | 11.96904000 | #Ti |
| 0.67978000  | 10.53142000 | 8.77078000  | #Ti |
| 2.17414000  | 7.27666000  | 8.88871000  | #Ti |

|            |             |            |     |
|------------|-------------|------------|-----|
| 0.73025000 | 7.31741000  | 5.31866000 | #Ti |
| 2.19898000 | 10.58201000 | 5.56511000 | #Ti |
| 0.72493000 | 10.53414000 | 2.37086000 | #Ti |
| 2.20729000 | 7.28266000  | 1.96754000 | #Ti |

Rut-His-C

1.000000000

11.834800 0.000000 0.000000

0.000000 12.992946 0.000000

0.000000 0.000000 30.000000

H C N O Ti

9 6 3 162 80

Cartesian

|            |            |             |    |
|------------|------------|-------------|----|
| 5.57894000 | 6.20424000 | 19.55638000 | #H |
| 5.54672000 | 6.18016000 | 17.80511000 | #H |
| 3.61869000 | 4.94193000 | 20.89260000 | #H |
| 1.92027000 | 2.77878000 | 17.67894000 | #H |
| 5.95393000 | 3.10750000 | 17.65934000 | #H |
| 7.56020000 | 3.03049000 | 17.67999000 | #H |
| 7.65661000 | 5.35682000 | 18.53852000 | #H |
| 6.82350000 | 2.37948000 | 20.97513000 | #H |
| 1.71533000 | 3.40254000 | 20.11221000 | #H |
| 5.52268000 | 5.53880000 | 18.68500000 | #C |
| 4.25598000 | 4.75941000 | 18.75258000 | #C |
| 3.49915000 | 4.56057000 | 19.88544000 | #C |
| 2.59122000 | 3.45156000 | 18.20263000 | #C |
| 6.80526000 | 4.67441000 | 18.68047000 | #C |
| 6.97150000 | 4.03639000 | 20.06262000 | #C |
| 3.66656000 | 4.06165000 | 17.69266000 | #N |
| 2.46053000 | 3.74066000 | 19.51424000 | #N |
| 6.78935000 | 3.69787000 | 17.57696000 | #N |
| 7.25388000 | 4.66020000 | 21.06895000 | #O |
| 6.72402000 | 2.69616000 | 20.05262000 | #O |
| 0.93819000 | 0.93429000 | 16.61367000 | #O |
| 2.36051000 | 5.38708000 | 15.44986000 | #O |
| 2.36411000 | 2.91060000 | 15.39562000 | #O |
| 0.91109000 | 0.87389000 | 14.02916000 | #O |
| 0.89649000 | 4.16640000 | 13.30315000 | #O |
| 2.40307000 | 2.19969000 | 12.06842000 | #O |
| 2.39960000 | 6.11386000 | 12.05606000 | #O |
| 0.94524000 | 4.15623000 | 10.75884000 | #O |
| 0.93076000 | 0.90457000 | 10.05431000 | #O |
| 2.40847000 | 5.40812000 | 8.76775000  | #O |
| 2.40108000 | 2.90109000 | 8.76812000  | #O |
| 0.92892000 | 0.90425000 | 7.44585000  | #O |
| 0.92043000 | 4.14805000 | 6.76197000  | #O |
| 2.40436000 | 2.19512000 | 5.45053000  | #O |
| 2.40431000 | 6.09390000 | 5.45302000  | #O |
| 0.92398000 | 4.14427000 | 4.18822000  | #O |
| 0.92485000 | 0.88657000 | 3.46324000  | #O |
| 2.40370000 | 5.35762000 | 2.03079000  | #O |
| 2.40267000 | 2.91813000 | 2.03525000  | #O |
| 0.92262000 | 0.89374000 | 0.88073000  | #O |
| 3.87691000 | 0.93526000 | 16.58589000 | #O |

|            |             |             |    |
|------------|-------------|-------------|----|
| 5.36017000 | 5.37581000  | 15.49653000 | #O |
| 5.33335000 | 2.89542000  | 15.37346000 | #O |
| 3.87516000 | 0.83925000  | 14.01869000 | #O |
| 3.86221000 | 4.17335000  | 13.39484000 | #O |
| 5.36101000 | 2.19541000  | 12.09267000 | #O |
| 5.36139000 | 6.11118000  | 12.06972000 | #O |
| 3.90148000 | 4.14973000  | 10.80471000 | #O |
| 3.89211000 | 0.90613000  | 10.06202000 | #O |
| 5.35419000 | 5.40773000  | 8.76923000  | #O |
| 5.35941000 | 2.90017000  | 8.76897000  | #O |
| 3.88635000 | 0.90618000  | 7.45062000  | #O |
| 3.87749000 | 4.14757000  | 6.77667000  | #O |
| 5.36104000 | 2.19495000  | 5.45356000  | #O |
| 5.36041000 | 6.09482000  | 5.45603000  | #O |
| 3.88339000 | 4.14648000  | 4.19522000  | #O |
| 3.88349000 | 0.88480000  | 3.46234000  | #O |
| 5.36025000 | 5.35684000  | 2.03245000  | #O |
| 5.36096000 | 2.91754000  | 2.03956000  | #O |
| 3.88199000 | 0.90268000  | 0.88085000  | #O |
| 6.83605000 | 0.94506000  | 16.58686000 | #O |
| 8.33928000 | 5.36411000  | 15.53784000 | #O |
| 8.36449000 | 2.90222000  | 15.40199000 | #O |
| 6.84692000 | 0.84599000  | 14.02184000 | #O |
| 6.85692000 | 4.16749000  | 13.38873000 | #O |
| 8.32341000 | 2.19878000  | 12.06962000 | #O |
| 8.32289000 | 6.10871000  | 12.05025000 | #O |
| 6.81385000 | 4.14852000  | 10.79973000 | #O |
| 6.85062000 | 0.90746000  | 10.06039000 | #O |
| 8.31322000 | 5.40702000  | 8.76345000  | #O |
| 8.31067000 | 2.90055000  | 8.76347000  | #O |
| 6.84124000 | 0.90282000  | 7.45139000  | #O |
| 6.83976000 | 4.14599000  | 6.77437000  | #O |
| 8.32203000 | 2.19492000  | 5.45342000  | #O |
| 8.31980000 | 6.09413000  | 5.45575000  | #O |
| 6.83823000 | 4.14525000  | 4.19646000  | #O |
| 6.84237000 | 0.88576000  | 3.46398000  | #O |
| 8.31895000 | 5.35708000  | 2.03067000  | #O |
| 8.31804000 | 2.91783000  | 2.03511000  | #O |
| 6.84108000 | 0.89464000  | 0.88102000  | #O |
| 0.92550000 | 7.40596000  | 16.62098000 | #O |
| 2.39677000 | 11.85965000 | 15.50346000 | #O |
| 2.40259000 | 9.42916000  | 15.48428000 | #O |
| 0.91553000 | 7.41162000  | 14.03768000 | #O |
| 0.92171000 | 10.65321000 | 13.33091000 | #O |
| 2.40232000 | 8.70917000  | 12.04954000 | #O |
| 2.39585000 | 12.59122000 | 12.03372000 | #O |
| 0.91835000 | 10.64380000 | 10.75141000 | #O |
| 0.92753000 | 7.41045000  | 10.05177000 | #O |
| 2.40225000 | 11.90395000 | 8.75227000  | #O |
| 2.40065000 | 9.39697000  | 8.74865000  | #O |
| 0.93021000 | 7.39634000  | 7.44426000  | #O |
| 0.92200000 | 10.64459000 | 6.74730000  | #O |
| 2.40430000 | 8.69529000  | 5.44883000  | #O |
| 2.40504000 | 12.58819000 | 5.44874000  | #O |
| 0.92246000 | 10.64146000 | 4.17226000  | #O |



|             |             |             |    |
|-------------|-------------|-------------|----|
| 0.92581000  | 7.38993000  | 3.46635000  | #O |
| 2.40348000  | 11.85445000 | 2.01081000  | #O |
| 2.40206000  | 9.41505000  | 2.01753000  | #O |
| 0.92127000  | 7.38185000  | 0.88491000  | #O |
| 3.89161000  | 7.39221000  | 16.58869000 | #O |
| 5.35710000  | 11.85784000 | 15.51606000 | #O |
| 5.36065000  | 9.43338000  | 15.47606000 | #O |
| 3.88634000  | 7.41935000  | 14.02334000 | #O |
| 3.88100000  | 10.66082000 | 13.32802000 | #O |
| 5.36538000  | 8.71044000  | 12.04743000 | #O |
| 5.36182000  | 12.59080000 | 12.02783000 | #O |
| 3.87785000  | 10.64578000 | 10.75074000 | #O |
| 3.89384000  | 7.40807000  | 10.06275000 | #O |
| 5.35855000  | 11.90402000 | 8.75281000  | #O |
| 5.36094000  | 9.39735000  | 8.75436000  | #O |
| 3.88850000  | 7.40523000  | 7.44924000  | #O |
| 3.88105000  | 10.64483000 | 6.74696000  | #O |
| 5.36224000  | 8.69560000  | 5.44721000  | #O |
| 5.36185000  | 12.58821000 | 5.44813000  | #O |
| 3.88077000  | 10.64160000 | 4.17205000  | #O |
| 3.88398000  | 7.38892000  | 3.46523000  | #O |
| 5.35969000  | 11.85476000 | 2.01054000  | #O |
| 5.36123000  | 9.41486000  | 2.01893000  | #O |
| 3.88077000  | 7.38539000  | 0.88519000  | #O |
| 6.82724000  | 7.41341000  | 16.58550000 | #O |
| 8.32107000  | 11.86295000 | 15.50871000 | #O |
| 8.31860000  | 9.43188000  | 15.47911000 | #O |
| 6.84962000  | 7.39981000  | 14.02390000 | #O |
| 6.83866000  | 10.66287000 | 13.33036000 | #O |
| 8.32536000  | 8.70966000  | 12.05853000 | #O |
| 8.32750000  | 12.59247000 | 12.03804000 | #O |
| 6.84230000  | 10.64670000 | 10.75275000 | #O |
| 6.85192000  | 7.40676000  | 10.06159000 | #O |
| 8.31804000  | 11.90402000 | 8.75102000  | #O |
| 8.31720000  | 9.39771000  | 8.74797000  | #O |
| 6.84085000  | 7.39919000  | 7.45181000  | #O |
| 6.83735000  | 10.64333000 | 6.74776000  | #O |
| 8.31986000  | 8.69509000  | 5.45055000  | #O |
| 8.32070000  | 12.58872000 | 5.45153000  | #O |
| 6.84043000  | 10.64328000 | 4.17203000  | #O |
| 6.84135000  | 7.38781000  | 3.46624000  | #O |
| 8.32148000  | 11.85395000 | 2.01073000  | #O |
| 8.31924000  | 9.41447000  | 2.02028000  | #O |
| 6.84092000  | 7.38128000  | 0.88453000  | #O |
| 9.79318000  | 0.91412000  | 16.61312000 | #O |
| 11.27516000 | 5.37597000  | 15.49065000 | #O |
| 11.27782000 | 2.93287000  | 15.48054000 | #O |
| 9.81424000  | 0.87308000  | 14.03337000 | #O |
| 9.81392000  | 4.17447000  | 13.31239000 | #O |
| 11.27699000 | 2.20413000  | 12.04389000 | #O |
| 11.27900000 | 6.11042000  | 12.03540000 | #O |
| 9.77142000  | 4.15105000  | 10.75692000 | #O |
| 9.80442000  | 0.90462000  | 10.05593000 | #O |
| 11.27252000 | 5.40701000  | 8.76562000  | #O |
| 11.27860000 | 2.90235000  | 8.76499000  | #O |

|             |             |             |     |
|-------------|-------------|-------------|-----|
| 9.80427000  | 0.90929000  | 7.44952000  | #O  |
| 9.79924000  | 4.15067000  | 6.76112000  | #O  |
| 11.27963000 | 2.19597000  | 5.45083000  | #O  |
| 11.27862000 | 6.09410000  | 5.45193000  | #O  |
| 9.79744000  | 4.14556000  | 4.18687000  | #O  |
| 9.80046000  | 0.88605000  | 3.46474000  | #O  |
| 11.27723000 | 5.35747000  | 2.02844000  | #O  |
| 11.27890000 | 2.91835000  | 2.03190000  | #O  |
| 9.79947000  | 0.90146000  | 0.88274000  | #O  |
| 9.79020000  | 7.41068000  | 16.62643000 | #O  |
| 11.28231000 | 11.86393000 | 15.51197000 | #O  |
| 11.27362000 | 9.42596000  | 15.48113000 | #O  |
| 9.79876000  | 7.39046000  | 14.04311000 | #O  |
| 9.80048000  | 10.66671000 | 13.33319000 | #O  |
| 11.27421000 | 8.70925000  | 12.05908000 | #O  |
| 11.28066000 | 12.59382000 | 12.03767000 | #O  |
| 9.79783000  | 10.64614000 | 10.75113000 | #O  |
| 9.80243000  | 7.41076000  | 10.05791000 | #O  |
| 11.27605000 | 11.90428000 | 8.75123000  | #O  |
| 11.27638000 | 9.39842000  | 8.74666000  | #O  |
| 9.80248000  | 7.40014000  | 7.45227000  | #O  |
| 9.79724000  | 10.64713000 | 6.74714000  | #O  |
| 11.27897000 | 8.69505000  | 5.45114000  | #O  |
| 11.27968000 | 12.58782000 | 5.44868000  | #O  |
| 9.79789000  | 10.64114000 | 4.17346000  | #O  |
| 9.80009000  | 7.38702000  | 3.46902000  | #O  |
| 11.27735000 | 11.85513000 | 2.01259000  | #O  |
| 11.27801000 | 9.41542000  | 2.01893000  | #O  |
| 9.79909000  | 7.38641000  | 0.88828000  | #O  |
| 0.91749000  | 4.17400000  | 15.09792000 | #Ti |
| 2.40398000  | 0.87558000  | 15.47583000 | #Ti |
| 0.91254000  | 0.89842000  | 12.15008000 | #Ti |
| 2.44523000  | 4.13600000  | 12.01215000 | #Ti |
| 0.87884000  | 4.15859000  | 8.77660000  | #Ti |
| 2.25468000  | 0.90941000  | 8.74287000  | #Ti |
| 0.92026000  | 0.86461000  | 5.33086000  | #Ti |
| 2.40668000  | 4.10959000  | 5.58102000  | #Ti |
| 0.92340000  | 4.13962000  | 2.37799000  | #Ti |
| 2.40056000  | 0.89419000  | 1.96762000  | #Ti |
| 3.87310000  | 4.12461000  | 15.38044000 | #Ti |
| 5.35282000  | 0.88219000  | 15.47567000 | #Ti |
| 3.87607000  | 0.88082000  | 12.12514000 | #Ti |
| 5.34505000  | 4.12762000  | 12.15871000 | #Ti |
| 3.83820000  | 4.15079000  | 8.83816000  | #Ti |
| 5.21883000  | 0.90670000  | 8.73808000  | #Ti |
| 3.87883000  | 0.87234000  | 5.32561000  | #Ti |
| 5.35635000  | 4.11507000  | 5.60091000  | #Ti |
| 3.88204000  | 4.13895000  | 2.38581000  | #Ti |
| 5.36057000  | 0.89387000  | 1.96713000  | #Ti |
| 6.84703000  | 4.17507000  | 15.33802000 | #Ti |
| 8.32229000  | 0.89520000  | 15.49007000 | #Ti |
| 6.83360000  | 0.87476000  | 12.13934000 | #Ti |
| 8.26622000  | 4.12475000  | 12.00245000 | #Ti |
| 6.78571000  | 4.15697000  | 8.84455000  | #Ti |
| 8.17713000  | 0.90903000  | 8.74743000  | #Ti |

|             |             |             |     |
|-------------|-------------|-------------|-----|
| 6.83495000  | 0.87288000  | 5.32882000  | #Ti |
| 8.30452000  | 4.11083000  | 5.58095000  | #Ti |
| 6.83907000  | 4.13899000  | 2.38584000  | #Ti |
| 8.31999000  | 0.89410000  | 1.96969000  | #Ti |
| 0.91504000  | 10.63596000 | 15.14268000 | #Ti |
| 2.39945000  | 7.39520000  | 15.51642000 | #Ti |
| 0.91552000  | 7.39362000  | 12.17160000 | #Ti |
| 2.39352000  | 10.63789000 | 11.94673000 | #Ti |
| 0.86262000  | 10.65211000 | 8.74878000  | #Ti |
| 2.25109000  | 7.39900000  | 8.74546000  | #Ti |
| 0.91815000  | 7.35920000  | 5.33691000  | #Ti |
| 2.39666000  | 10.60609000 | 5.54887000  | #Ti |
| 0.92240000  | 10.63716000 | 2.35765000  | #Ti |
| 2.39831000  | 7.38395000  | 1.97215000  | #Ti |
| 3.87397000  | 10.64872000 | 15.13718000 | #Ti |
| 5.34827000  | 7.43622000  | 15.44563000 | #Ti |
| 3.87096000  | 7.38473000  | 12.12260000 | #Ti |
| 5.35493000  | 10.62047000 | 11.94449000 | #Ti |
| 3.82094000  | 10.64860000 | 8.74907000  | #Ti |
| 5.21869000  | 7.40143000  | 8.73614000  | #Ti |
| 3.87692000  | 7.36532000  | 5.32835000  | #Ti |
| 5.35514000  | 10.61027000 | 5.54827000  | #Ti |
| 3.88119000  | 10.63463000 | 2.35743000  | #Ti |
| 5.35953000  | 7.38354000  | 1.96924000  | #Ti |
| 6.84521000  | 10.65817000 | 15.13964000 | #Ti |
| 8.31373000  | 7.41283000  | 15.51745000 | #Ti |
| 6.83576000  | 7.37311000  | 12.13114000 | #Ti |
| 8.31581000  | 10.62399000 | 11.95043000 | #Ti |
| 6.78190000  | 10.65229000 | 8.75047000  | #Ti |
| 8.18065000  | 7.39997000  | 8.74483000  | #Ti |
| 6.83475000  | 7.36498000  | 5.32984000  | #Ti |
| 8.31364000  | 10.60656000 | 5.55016000  | #Ti |
| 6.84009000  | 10.63711000 | 2.35751000  | #Ti |
| 8.31944000  | 7.38343000  | 1.97376000  | #Ti |
| 9.80679000  | 4.13854000  | 15.10943000 | #Ti |
| 11.27928000 | 0.90930000  | 15.52924000 | #Ti |
| 9.79385000  | 0.88713000  | 12.15553000 | #Ti |
| 11.27227000 | 4.14192000  | 11.89639000 | #Ti |
| 9.74401000  | 4.15205000  | 8.77352000  | #Ti |
| 11.13240000 | 0.91094000  | 8.75187000  | #Ti |
| 9.79319000  | 0.86563000  | 5.33270000  | #Ti |
| 11.27344000 | 4.10447000  | 5.56155000  | #Ti |
| 9.79788000  | 4.13883000  | 2.37716000  | #Ti |
| 11.27775000 | 0.89447000  | 1.97097000  | #Ti |
| 9.80443000  | 10.65319000 | 15.14464000 | #Ti |
| 11.27104000 | 7.38704000  | 15.54107000 | #Ti |
| 9.79326000  | 7.38136000  | 12.17021000 | #Ti |
| 11.27162000 | 10.63461000 | 11.94994000 | #Ti |
| 9.74052000  | 10.65030000 | 8.75032000  | #Ti |
| 11.13187000 | 7.39873000  | 8.76269000  | #Ti |
| 9.79428000  | 7.36012000  | 5.33814000  | #Ti |
| 11.27215000 | 10.60373000 | 5.54913000  | #Ti |
| 9.79859000  | 10.63480000 | 2.35854000  | #Ti |
| 11.27731000 | 7.38378000  | 1.97664000  | #Ti |

*Amino acids adsorbed on anatase*

Ana-Phe-Z

1.000000000

15.138000 0.000000 0.000000

0.000000 20.478700 0.000000

0.000000 0.000000 30.000000

H C N O Ti

11 9 1 194 96

Cartesian

|             |             |             |    |
|-------------|-------------|-------------|----|
| 9.27130154  | 3.33708628  | 8.14740676  | #H |
| 10.64402749 | 3.98081374  | 8.89530676  | #H |
| 9.71775749  | 2.91751868  | 9.79977676  | #H |
| 7.90485483  | 4.48860358  | 9.94971676  | #H |
| 10.60982772 | 5.94594979  | 10.21509676 | #H |
| 9.10802307  | 6.78508500  | 10.44390676 | #H |
| 9.78168678  | 7.63421382  | 12.48003676 | #H |
| 9.39562993  | 3.35447270  | 12.02607676 | #H |
| 9.97696698  | 7.35474100  | 14.93085676 | #H |
| 9.58968698  | 3.08517779  | 14.46393676 | #H |
| 9.89228652  | 5.07036249  | 15.93645676 | #H |
| 8.68811009  | 5.68099637  | 8.29299676  | #C |
| 8.86813118  | 4.86803294  | 9.58779676  | #C |
| 9.57895702  | 5.79799118  | 10.58310676 | #C |
| 9.59445712  | 5.52003379  | 12.06645676 | #C |
| 9.74517695  | 6.63341975  | 12.91656676 | #C |
| 9.53154707  | 4.24505040  | 12.64506676 | #C |
| 9.85510759  | 6.47712631  | 14.29422676 | #C |
| 9.63582761  | 4.08380112  | 14.02893676 | #C |
| 9.80446644  | 5.19743283  | 14.85690676 | #C |
| 9.68352744  | 3.67887579  | 9.11586676  | #N |
| 2.98055426  | 18.49394556 | 6.69945676  | #O |
| 10.54244697 | 18.49822560 | 6.69654676  | #O |
| 2.96824706  | 8.24435006  | 6.71601676  | #O |
| 10.55335692 | 8.31769043  | 6.71571676  | #O |
| 14.32752978 | 18.49709928 | 6.69987676  | #O |
| 6.77327419  | 18.49660779 | 6.69657676  | #O |
| 14.32699995 | 8.24479035  | 6.71037676  | #O |
| 6.76858141  | 8.30735893  | 6.74556676  | #O |
| 1.08338441  | 13.37527401 | 6.70605676  | #O |
| 8.65597211  | 13.37558119 | 6.70098676  | #O |
| 1.08974237  | 3.12398493  | 6.70842676  | #O |
| 8.71475297  | 3.13340513  | 6.70044676  | #O |
| 4.86007320  | 13.37916497 | 6.70791676  | #O |
| 12.44524058 | 13.38162241 | 6.70449676  | #O |
| 4.85686394  | 3.11777988  | 6.71133676  | #O |
| 12.39685954 | 3.12464025  | 6.72462676  | #O |
| 2.96838331  | 11.25087511 | 6.08013676  | #O |
| 10.54770742 | 11.27340168 | 6.05529676  | #O |
| 2.97832897  | 1.00200252  | 6.06576676  | #O |
| 10.54349755 | 1.00929293  | 6.07215676  | #O |
| 14.33402398 | 11.24999453 | 6.08031676  | #O |
| 6.75559301  | 11.26992030 | 6.06513676  | #O |
| 14.32917982 | 1.00925197  | 6.07299676  | #O |
| 6.76858141  | 1.01678814  | 6.06492676  | #O |

|             |             |            |    |
|-------------|-------------|------------|----|
| 1.08517069  | 16.37104160 | 6.07047676 | #O |
| 8.65550284  | 16.37306899 | 6.06372676 | #O |
| 1.08514042  | 6.12216900  | 6.07404676 | #O |
| 8.64522413  | 6.24172365  | 5.51430676 | #O |
| 4.87122991  | 16.37376527 | 6.06516676 | #O |
| 12.43853445 | 16.37566979 | 6.06444676 | #O |
| 4.86593161  | 6.11723364  | 6.08895676 | #O |
| 12.44219785 | 6.12186182  | 6.07887676 | #O |
| 1.08184033  | 9.80268288  | 5.24589676 | #O |
| 8.65011371  | 9.81116106  | 5.24562676 | #O |
| 1.08403534  | 20.03967783 | 5.23743676 | #O |
| 8.65597211  | 20.05849776 | 5.22537676 | #O |
| 4.85648549  | 9.81431478  | 5.26443676 | #O |
| 12.44881315 | 9.82316158  | 5.24316676 | #O |
| 4.87498413  | 20.03959592 | 5.23683676 | #O |
| 12.43624861 | 20.04977383 | 5.23296676 | #O |
| 2.97681517  | 14.92696559 | 5.23926676 | #O |
| 10.54778765 | 14.92952543 | 5.23722676 | #O |
| 2.97642158  | 4.67966985  | 5.23917676 | #O |
| 10.54894723 | 4.66482280  | 5.25441676 | #O |
| 14.33225284 | 14.92981213 | 5.23785676 | #O |
| 6.76217804  | 14.92760043 | 5.24154676 | #O |
| 14.32887706 | 4.67250231  | 5.25786676 | #O |
| 6.76628044  | 4.64162043  | 5.29605676 | #O |
| 1.08347524  | 12.70762744 | 4.29190576 | #O |
| 8.64750997  | 12.71321812 | 4.28468776 | #O |
| 1.08498904  | 2.45850910  | 4.28853676 | #O |
| 8.63897214  | 2.46182664  | 4.23989776 | #O |
| 4.86744541  | 12.70973674 | 4.29210676 | #O |
| 12.44059322 | 12.71344339 | 4.28842576 | #O |
| 4.87835990  | 2.46201095  | 4.28497576 | #O |
| 12.44805625 | 2.46637292  | 4.28967676 | #O |
| 2.98498969  | 7.58389765  | 4.29878776 | #O |
| 10.63553659 | 7.62563324  | 4.32002776 | #O |
| 2.97642158  | 17.82375962 | 4.28401576 | #O |
| 10.54560778 | 17.82957557 | 4.28048776 | #O |
| 14.32957341 | 7.58350856  | 4.29141676 | #O |
| 6.65830108  | 7.61418565  | 4.35270676 | #O |
| 14.33263129 | 17.82728196 | 4.28487676 | #O |
| 6.76506940  | 17.82963701 | 4.28151676 | #O |
| 2.97398437  | 9.83735332  | 3.18002776 | #O |
| 10.54248633 | 9.86391420  | 3.17939776 | #O |
| 2.97904046  | 20.07739960 | 3.16301776 | #O |
| 10.54774678 | 20.08063523 | 3.15611776 | #O |
| 14.32830182 | 9.83893018  | 3.17489776 | #O |
| 6.76240511  | 9.85578415  | 3.19426576 | #O |
| 14.33352443 | 20.07885359 | 3.16262776 | #O |
| 6.76447901  | 20.08034853 | 3.15509776 | #O |
| 1.07966046  | 4.71683870  | 3.17560576 | #O |
| 8.65217248  | 4.68536293  | 3.12329776 | #O |
| 1.08467114  | 14.96130837 | 3.16921576 | #O |
| 8.65298993  | 14.96485119 | 3.16640776 | #O |
| 4.88629222  | 4.71657247  | 3.17549776 | #O |
| 12.43314532 | 4.71819029  | 3.17431576 | #O |
| 4.87050328  | 14.96143124 | 3.16896676 | #O |

|             |             |             |    |
|-------------|-------------|-------------|----|
| 12.43764131 | 14.96382725 | 3.16644676  | #O |
| 2.98026664  | 2.56028823  | 2.24812576  | #O |
| 10.54890635 | 2.55359170  | 2.22954676  | #O |
| 2.97754180  | 12.80068265 | 2.25283576  | #O |
| 10.54346727 | 12.80760445 | 2.24483776  | #O |
| 14.33234366 | 2.56092307  | 2.24314576  | #O |
| 6.76175417  | 2.55498425  | 2.21712676  | #O |
| 14.32905872 | 12.80301722 | 2.25059776  | #O |
| 6.76045231  | 12.80600711 | 2.24565676  | #O |
| 1.08550373  | 7.67521218  | 2.25480676  | #O |
| 8.65232386  | 7.66253586  | 2.31356776  | #O |
| 1.08585190  | 17.92127919 | 2.23898776  | #O |
| 8.65463997  | 17.92383903 | 2.23576576  | #O |
| 4.86735458  | 7.67945127  | 2.24611576  | #O |
| 12.44191022 | 7.68309648  | 2.23931776  | #O |
| 4.87010969  | 17.92086962 | 2.23990576  | #O |
| 12.43965466 | 17.92197547 | 2.23941676  | #O |
| 1.08727487  | 1.06767771  | 1.64052676  | #O |
| 8.65603267  | 1.05436655  | 1.60560676  | #O |
| 1.08389910  | 11.30489792 | 1.65735676  | #O |
| 8.65156696  | 11.30647478 | 1.65186676  | #O |
| 4.86759679  | 1.06399154  | 1.63695676  | #O |
| 12.44412037 | 1.06548649  | 1.63845676  | #O |
| 4.86897434  | 11.29977825 | 1.65978676  | #O |
| 12.43643027 | 11.30596281 | 1.65150676  | #O |
| 2.97966112  | 6.17948889  | 1.65861676  | #O |
| 10.54102702 | 6.19155084  | 1.65918676  | #O |
| 2.97758721  | 16.42242266 | 1.64781676  | #O |
| 10.54718668 | 16.42422478 | 1.64667676  | #O |
| 14.32954313 | 6.18237638  | 1.65231676  | #O |
| 6.76835434  | 6.18892957  | 1.66302676  | #O |
| 14.33179870 | 16.42379473 | 1.64757676  | #O |
| 6.76207207  | 16.42320085 | 1.64661676  | #O |
| 1.08904602  | 4.02760757  | 0.72945676  | #O |
| 8.66040755  | 4.02844719  | 0.68637676  | #O |
| 1.08402020  | 14.26484826 | 0.72606676  | #O |
| 8.65191513  | 14.26857539 | 0.72225676  | #O |
| 4.86905003  | 4.02983975  | 0.72768676  | #O |
| 12.43879180 | 4.03010597  | 0.72690676  | #O |
| 4.86676420  | 14.26560597 | 0.72567676  | #O |
| 12.43632430 | 14.26654799 | 0.72294676  | #O |
| 2.97897991  | 19.38569055 | 0.71802676  | #O |
| 10.55024758 | 19.38290544 | 0.71043676  | #O |
| 2.97191046  | 9.14437050  | 0.73710676  | #O |
| 10.53537752 | 9.14069867  | 0.75288676  | #O |
| 14.33101152 | 19.38595677 | 0.71778676  | #O |
| 6.75806050  | 19.38206582 | 0.70968676  | #O |
| 14.33605247 | 9.14901916  | 0.73197676  | #O |
| 6.77185122  | 9.13595989  | 0.76770676  | #O |
| 2.97725417  | 1.16124489  | 29.59902676 | #O |
| 10.56138763 | 1.16263744  | 29.58705676 | #O |
| 2.97558899  | 11.40301137 | 29.61936676 | #O |
| 10.54750760 | 11.40389196 | 29.61231676 | #O |
| 14.33479602 | 1.16159302  | 29.59848676 | #O |
| 6.75485125  | 1.16040526  | 29.58531676 | #O |

|             |             |             |    |
|-------------|-------------|-------------|----|
| 14.33201063 | 11.40550977 | 29.61489676 | #O |
| 6.75924127  | 11.40000100 | 29.62131676 | #O |
| 1.08595787  | 16.51906164 | 29.60253676 | #O |
| 8.65703177  | 16.52190818 | 29.59923676 | #O |
| 1.08968182  | 6.28225100  | 29.61423676 | #O |
| 8.65476107  | 6.28829222  | 29.60880676 | #O |
| 4.87112394  | 16.52033132 | 29.60196676 | #O |
| 12.43853445 | 16.52029037 | 29.60043676 | #O |
| 4.87892001  | 6.27817574  | 29.61198676 | #O |
| 12.43196456 | 6.27930207  | 29.60979676 | #O |
| 2.97766290  | 14.30054264 | 28.65732676 | #O |
| 10.54439674 | 14.30113652 | 28.65045676 | #O |
| 2.97943405  | 4.06324051  | 28.65816676 | #O |
| 10.55252736 | 4.06688571  | 28.63401676 | #O |
| 14.32996700 | 14.30211950 | 28.65339676 | #O |
| 6.76151197  | 14.30027641 | 28.65720676 | #O |
| 14.33493226 | 4.06332242  | 28.65894676 | #O |
| 6.76354046  | 4.06516550  | 28.63833676 | #O |
| 1.08639687  | 19.42158971 | 28.64328676 | #O |
| 8.65677443  | 19.42619742 | 28.63056676 | #O |
| 1.08774415  | 9.18536066  | 28.66473676 | #O |
| 8.65485190  | 9.18047035  | 28.67625676 | #O |
| 4.87103311  | 19.42404715 | 28.63101676 | #O |
| 12.44103222 | 19.42324848 | 28.63359676 | #O |
| 4.87230470  | 9.17683948  | 28.68903676 | #O |
| 12.43921566 | 9.18219056  | 28.67496676 | #O |
| 1.08563997  | 12.85304668 | 27.83172676 | #O |
| 8.65135502  | 12.85120360 | 27.83100676 | #O |
| 1.08828912  | 2.62465279  | 27.82011676 | #O |
| 8.65783409  | 2.62168338  | 27.81408676 | #O |
| 4.87023080  | 12.85278046 | 27.83358676 | #O |
| 12.43705093 | 12.85376344 | 27.82896676 | #O |
| 4.86847479  | 2.62164242  | 27.81810676 | #O |
| 12.44679980 | 2.62299401  | 27.81633676 | #O |
| 2.97749638  | 17.97460572 | 27.82173676 | #O |
| 10.54859754 | 17.97577301 | 27.81468676 | #O |
| 2.98167447  | 7.74113966  | 27.83994676 | #O |
| 10.54702773 | 7.74255966  | 27.83517676 | #O |
| 14.33267670 | 17.97517913 | 27.81972676 | #O |
| 6.76305604  | 17.97462620 | 27.81708676 | #O |
| 14.33272211 | 7.74122957  | 27.84207676 | #O |
| 6.76379780  | 7.74204974  | 27.83721676 | #O |
| 1.08623035  | 15.84934672 | 27.18876676 | #O |
| 8.65285369  | 15.84985868 | 27.18597676 | #O |
| 1.08827398  | 5.62048181  | 27.19752676 | #O |
| 8.65769785  | 5.62734218  | 27.18558676 | #O |
| 4.86926197  | 15.84906002 | 27.18858676 | #O |
| 12.43891290 | 15.84983821 | 27.18633676 | #O |
| 4.86531095  | 5.61972410  | 27.19479676 | #O |
| 12.45283986 | 5.62265255  | 27.19221676 | #O |
| 2.98853198  | 10.72954884 | 27.20574676 | #O |
| 10.54547760 | 10.72399912 | 27.20547676 | #O |
| 2.97602800  | 0.49978288  | 27.18285676 | #O |
| 10.55092728 | 0.49953713  | 27.17112676 | #O |
| 14.32934634 | 10.73171959 | 27.20088676 | #O |

|             |             |             |     |
|-------------|-------------|-------------|-----|
| 6.75936237  | 10.72094779 | 27.21522676 | #O  |
| 14.33758141 | 0.49941426  | 27.18222676 | #O  |
| 6.76603823  | 0.49908660  | 27.16977676 | #O  |
| 7.52529976  | 5.94816149  | 7.89780676  | #O  |
| 9.82170711  | 5.95997770  | 7.77960676  | #O  |
| 1.08308165  | 11.76255591 | 5.81196676  | #Ti |
| 8.64829715  | 11.76142958 | 5.80014676  | #Ti |
| 1.08742625  | 1.51988836  | 5.80701676  | #Ti |
| 8.65055271  | 1.54235349  | 5.76507676  | #Ti |
| 4.87023080  | 11.76489048 | 5.81199676  | #Ti |
| 12.43443205 | 11.76790085 | 5.80731676  | #Ti |
| 4.87007942  | 1.52109660  | 5.80026676  | #Ti |
| 12.44065377 | 1.52230485  | 5.80029676  | #Ti |
| 2.97734500  | 16.88259953 | 5.80338676  | #Ti |
| 10.54614670 | 16.88483170 | 5.79807676  | #Ti |
| 2.98129602  | 6.63634820  | 5.81415676  | #Ti |
| 10.53374716 | 6.66092264  | 5.91234676  | #Ti |
| 14.33195008 | 16.88458596 | 5.80371676  | #Ti |
| 6.76351018  | 16.88374633 | 5.79918676  | #Ti |
| 14.33237394 | 6.63888756  | 5.80686676  | #Ti |
| 6.77731604  | 6.64869686  | 5.95485676  | #Ti |
| 2.97418116  | 9.40917033  | 5.28720676  | #Ti |
| 10.54959665 | 9.41794955  | 5.25024676  | #Ti |
| 2.97891935  | 19.64769504 | 5.26287676  | #Ti |
| 10.54510671 | 19.65295806 | 5.25990676  | #Ti |
| 14.32759033 | 9.41251040  | 5.27994676  | #Ti |
| 6.75314065  | 9.40225057  | 5.27151676  | #Ti |
| 14.33232853 | 19.65005009 | 5.26287676  | #Ti |
| 6.76517536  | 19.65086923 | 5.26005676  | #Ti |
| 1.08476197  | 14.52896206 | 5.27124676  | #Ti |
| 8.65462483  | 14.52847057 | 5.26941676  | #Ti |
| 1.08691156  | 4.28821950  | 5.27295676  | #Ti |
| 8.65462483  | 4.34869311  | 5.08176676  | #Ti |
| 4.86818717  | 14.52974025 | 5.27229676  | #Ti |
| 12.44015422 | 14.53240248 | 5.26905676  | #Ti |
| 4.88185678  | 4.29274530  | 5.28165676  | #Ti |
| 12.42371435 | 4.29966710  | 5.27235676  | #Ti |
| 1.08747167  | 2.96834681  | 2.27376676  | #Ti |
| 8.65529090  | 2.94108966  | 2.19928576  | #Ti |
| 1.08435324  | 13.20751250 | 2.27597776  | #Ti |
| 8.65070409  | 13.20485027 | 2.27138776  | #Ti |
| 4.87124504  | 2.96945266  | 2.27183776  | #Ti |
| 12.44197078 | 2.97021037  | 2.26810576  | #Ti |
| 4.87746676  | 13.20493219 | 2.27553676  | #Ti |
| 12.42736261 | 13.20671383 | 2.27232676  | #Ti |
| 2.97601286  | 8.09045878  | 2.28496576  | #Ti |
| 10.55109682 | 8.08217924  | 2.34561676  | #Ti |
| 2.97825328  | 18.32716702 | 2.26463776  | #Ti |
| 10.54649638 | 18.32524203 | 2.25996676  | #Ti |
| 14.33281294 | 8.09332989  | 2.27791576  | #Ti |
| 6.75488152  | 8.07919959  | 2.36570776  | #Ti |
| 14.33143538 | 18.32817048 | 2.26450576  | #Ti |
| 6.76260190  | 18.32542633 | 2.25961576  | #Ti |
| 2.97726931  | 0.65470424  | 1.61544676  | #Ti |
| 10.55874757 | 0.64780292  | 1.60599676  | #Ti |



|             |             |             |     |
|-------------|-------------|-------------|-----|
| 2.97751152  | 10.89860051 | 1.63596676  | #Ti |
| 10.54122685 | 10.88270904 | 1.61865676  | #Ti |
| 14.33549237 | 0.65513429  | 1.61478676  | #Ti |
| 6.75229292  | 0.64722952  | 1.60437676  | #Ti |
| 14.32752978 | 10.90286008 | 1.63158676  | #Ti |
| 6.76258676  | 10.87486570 | 1.62909676  | #Ti |
| 1.08547345  | 5.77521887  | 1.62972676  | #Ti |
| 8.65230872  | 5.80530208  | 1.58151676  | #Ti |
| 1.08517069  | 16.01254148 | 1.62171676  | #Ti |
| 8.65414042  | 16.01121036 | 1.62030676  | #Ti |
| 4.87060925  | 5.77712339  | 1.62849676  | #Ti |
| 12.43906428 | 5.78039998  | 1.62594676  | #Ti |
| 4.86826286  | 16.01082127 | 1.62213676  | #Ti |
| 12.44022991 | 16.01272579 | 1.62018676  | #Ti |
| 1.08520097  | 14.69344697 | 28.62570676 | #Ti |
| 8.65288396  | 14.69369272 | 28.62438676 | #Ti |
| 1.08889464  | 4.45919617  | 28.62933676 | #Ti |
| 8.65797033  | 4.44891586  | 28.60626676 | #Ti |
| 4.87089687  | 14.69363128 | 28.62684676 | #Ti |
| 12.43612751 | 14.69356985 | 28.62402676 | #Ti |
| 4.87100284  | 4.45854085  | 28.62552676 | #Ti |
| 12.44487727 | 4.46017915  | 28.62183676 | #Ti |
| 2.97849549  | 19.81600947 | 28.61439676 | #Ti |
| 10.54938774 | 19.81643952 | 28.60422676 | #Ti |
| 2.98085702  | 9.57559048  | 28.64388676 | #Ti |
| 10.54771651 | 9.57436995  | 28.65336676 | #Ti |
| 14.33334277 | 19.81600947 | 28.61388676 | #Ti |
| 6.76390377  | 19.81605043 | 28.60281676 | #Ti |
| 14.33322167 | 9.57748067  | 28.63917676 | #Ti |
| 6.76228400  | 9.57273985  | 28.66290676 | #Ti |
| 2.97760235  | 12.34046482 | 28.09728676 | #Ti |
| 10.54465712 | 12.33696297 | 28.08750676 | #Ti |
| 2.97769318  | 2.10602971  | 28.08168676 | #Ti |
| 10.55710661 | 2.10572253  | 28.06992676 | #Ti |
| 14.33004269 | 12.34236934 | 28.09284676 | #Ti |
| 6.76024037  | 12.33458744 | 28.09620676 | #Ti |
| 14.33682451 | 2.10605019  | 28.08105676 | #Ti |
| 6.75845409  | 2.10519008  | 28.06935676 | #Ti |
| 1.08635146  | 17.45903397 | 28.08228676 | #Ti |
| 8.65632029  | 17.45932067 | 28.07832676 | #Ti |
| 1.08834967  | 7.22744540  | 28.09722676 | #Ti |
| 8.65483676  | 7.23236029  | 28.08603676 | #Ti |
| 4.87033676  | 17.45884966 | 28.08090676 | #Ti |
| 12.44088084 | 17.45911589 | 28.07946676 | #Ti |
| 4.87319785  | 7.22629859  | 28.09689676 | #Ti |
| 12.43906428 | 7.22869460  | 28.09515676 | #Ti |

Ana-Leu-Z

1.000000000

7.569000 0.000000 0.000000

0.000000 10.239350 0.000000

0.000000 0.000000 25.000000

H C N O Ti

13 6 1 50 24

Cartesian

|            |            |             |    |
|------------|------------|-------------|----|
| 4.00063598 | 2.40386128 | 7.93103064  | #H |
| 5.42942598 | 2.93897128 | 8.76316064  | #H |
| 4.48050598 | 1.85019128 | 9.60572064  | #H |
| 2.72715598 | 3.45881128 | 9.88364064  | #H |
| 4.64757598 | 2.58895128 | 11.77737064 | #H |
| 5.83178598 | 5.11032128 | 13.06748064 | #H |
| 5.88514598 | 3.47923128 | 13.76608064 | #H |
| 6.74093598 | 3.82592128 | 12.24428064 | #H |
| 2.38744598 | 3.63658128 | 12.32478064 | #H |
| 3.32643598 | 3.21421128 | 13.77231064 | #H |
| 3.24410598 | 4.90215128 | 13.22958064 | #H |
| 5.50276598 | 4.70291128 | 10.33992064 | #H |
| 4.03221598 | 5.45706128 | 10.93179064 | #H |
| 3.54840598 | 4.77975128 | 8.37393064  | #C |
| 3.71457598 | 3.82505128 | 9.57315064  | #C |
| 4.49282598 | 4.47822128 | 10.71931064 | #C |
| 4.56840598 | 3.66472128 | 12.02899064 | #C |
| 5.82816598 | 4.03734128 | 12.82094064 | #C |
| 3.30932598 | 3.85896128 | 12.88252064 | #C |
| 4.46218598 | 2.65953128 | 8.98023064  | #N |
| 5.36549598 | 7.45737128 | 6.76102064  | #O |
| 1.57827598 | 7.44269128 | 6.78653064  | #O |
| 3.49926598 | 2.26368128 | 6.67844064  | #O |
| 7.20529598 | 2.26237128 | 6.74335064  | #O |
| 5.34324598 | 0.16614128 | 6.06705064  | #O |
| 1.57380598 | 0.17124128 | 6.07595064  | #O |
| 3.46952598 | 5.35810128 | 5.58482064  | #O |
| 7.26008598 | 5.24540128 | 6.14676064  | #O |
| 3.45647598 | 8.93902128 | 5.26087064  | #O |
| 7.24806598 | 8.96095128 | 5.28114064  | #O |
| 5.36596598 | 3.80429128 | 5.26345064  | #O |
| 1.57952598 | 3.78706128 | 5.30205064  | #O |
| 3.44539598 | 1.58588128 | 4.22848064  | #O |
| 7.26555598 | 1.60556128 | 4.29770064  | #O |
| 5.44612598 | 6.73884128 | 4.37220064  | #O |
| 1.48736598 | 6.72942128 | 4.39934064  | #O |
| 5.34925598 | 8.96871128 | 3.20430064  | #O |
| 1.57849598 | 8.96065128 | 3.20941064  | #O |
| 3.46657598 | 3.80556128 | 3.12831064  | #O |
| 7.26150598 | 3.83266128 | 3.18192064  | #O |
| 5.36259598 | 1.66145128 | 2.23460064  | #O |
| 1.57152598 | 1.66206128 | 2.21705064  | #O |
| 3.46773598 | 6.75686128 | 2.34796064  | #O |
| 7.25436598 | 6.77386128 | 2.29205064  | #O |
| 3.46644598 | 0.15265128 | 1.63247064  | #O |
| 7.25193598 | 0.15306128 | 1.66712064  | #O |
| 5.35757598 | 5.29907128 | 1.65954064  | #O |
| 1.58089598 | 5.29854128 | 1.65868064  | #O |
| 3.46974598 | 3.13195128 | 0.69375064  | #O |
| 7.24875598 | 3.13186128 | 0.73384064  | #O |
| 5.35623598 | 8.22466128 | 0.78160064  | #O |
| 1.58305598 | 8.22062128 | 0.78661064  | #O |
| 5.36618598 | 0.24195128 | 24.61957064 | #O |
| 1.56940598 | 0.23718128 | 24.61889064 | #O |

|            |            |             |     |
|------------|------------|-------------|-----|
| 3.46897598 | 5.37965128 | 24.61095064 | #O  |
| 7.25421598 | 5.36854128 | 24.61527064 | #O  |
| 5.36142598 | 3.13935128 | 23.64153064 | #O  |
| 1.57450598 | 3.13970128 | 23.64184064 | #O  |
| 3.46974598 | 8.26118128 | 23.68997064 | #O  |
| 7.25512598 | 8.25773128 | 23.69856064 | #O  |
| 3.46773598 | 1.69100128 | 22.83400064 | #O  |
| 7.25308598 | 1.69012128 | 22.83696064 | #O  |
| 5.36195598 | 6.82594128 | 22.83979064 | #O  |
| 1.57768598 | 6.82506128 | 22.83885064 | #O  |
| 3.46910598 | 4.70333128 | 22.19255064 | #O  |
| 7.25091598 | 4.69881128 | 22.20161064 | #O  |
| 5.36347598 | 9.79347128 | 22.21593064 | #O  |
| 1.57733598 | 9.79388128 | 22.21458064 | #O  |
| 2.38469598 | 5.07972128 | 7.98919064  | #O  |
| 4.67695598 | 5.09996128 | 7.87075064  | #O  |
| 3.45002598 | 0.64768128 | 5.73821064  | #Ti |
| 7.24748598 | 0.66022128 | 5.80561064  | #Ti |
| 5.35775598 | 5.78022128 | 5.98868064  | #Ti |
| 1.60899598 | 5.76932128 | 6.01447064  | #Ti |
| 5.36028598 | 8.53433128 | 5.28245064  | #Ti |
| 1.55756598 | 8.51739128 | 5.29933064  | #Ti |
| 3.47445598 | 3.48991128 | 5.07861064  | #Ti |
| 7.25624598 | 3.44271128 | 5.29743064  | #Ti |
| 3.46620598 | 2.03213128 | 2.20963064  | #Ti |
| 7.25233598 | 2.06313128 | 2.28180064  | #Ti |
| 5.36503598 | 7.17175128 | 2.39536064  | #Ti |
| 1.57260598 | 7.17431128 | 2.39834064  | #Ti |
| 5.36694598 | 9.96225128 | 1.63360064  | #Ti |
| 1.56637598 | 9.95980128 | 1.63704064  | #Ti |
| 3.46866598 | 4.90543128 | 1.58542064  | #Ti |
| 7.25540598 | 4.87875128 | 1.63710064  | #Ti |
| 3.46834598 | 3.52675128 | 23.62214064 | #Ti |
| 7.25218598 | 3.53797128 | 23.63939064 | #Ti |
| 5.36328598 | 8.65001128 | 23.67595064 | #Ti |
| 1.57787598 | 8.65047128 | 23.67268064 | #Ti |
| 5.36475598 | 1.16934128 | 23.09391064 | #Ti |
| 1.57141598 | 1.16939128 | 23.09528064 | #Ti |
| 3.46986598 | 6.31210128 | 23.08671064 | #Ti |
| 7.25435598 | 6.30764128 | 23.09926064 | #Ti |

Ana-Arg-Z

1.000000000

7.569000 0.000000 0.000000

0.000000 20.478700 0.000000

0.000000 0.000000 30.000000

H C N O Ti

14 6 4 98 48

Cartesian

3.76281596 8.14640335 7.77679058 #H

4.98669596 9.02332335 8.57289058 #H

4.33404596 7.70004335 9.39002058 #H

2.12436596 8.78811335 9.30231058 #H

4.19895596 10.73068335 10.48919058 #H

|            |             |             |    |
|------------|-------------|-------------|----|
| 2.47270596 | 10.68559335 | 10.83184058 | #H |
| 2.80058596 | 8.32506335  | 11.82886058 | #H |
| 4.55058596 | 8.57746335  | 11.69968058 | #H |
| 4.35008596 | 10.67904335 | 13.05534058 | #H |
| 2.60805596 | 10.42739335 | 13.18568058 | #H |
| 3.12489596 | 8.32200335  | 14.37622058 | #H |
| 5.77764596 | 10.51288335 | 14.93366058 | #H |
| 5.20753596 | 11.01477335 | 16.44559058 | #H |
| 3.59772596 | 9.63236335  | 17.39814058 | #H |
| 2.90229596 | 10.45658335 | 8.16162058  | #C |
| 3.04189596 | 9.39001335  | 9.26626058  | #C |
| 3.34329596 | 10.04666335 | 10.60996058 | #C |
| 3.58451596 | 9.10211335  | 11.79156058 | #C |
| 3.57901596 | 9.89738335  | 13.09860058 | #C |
| 4.01063596 | 9.64826335  | 15.52020058 | #C |
| 4.13010596 | 8.48189335  | 8.76200058  | #N |
| 3.83225596 | 9.04833335  | 14.26166058 | #N |
| 4.96524596 | 10.66313335 | 15.52594058 | #N |
| 3.28734596 | 9.23906335  | 16.50381058 | #N |
| 4.73795596 | 2.96478335  | 6.58947058  | #O |
| 4.75327596 | 13.25101335 | 6.63913058  | #O |
| 0.96404596 | 2.96508335  | 6.58758058  | #O |
| 0.98532596 | 13.23645335 | 6.66073058  | #O |
| 2.85441596 | 18.32448335 | 6.60026058  | #O |
| 2.93411596 | 8.06554335  | 6.51145058  | #O |
| 6.63731596 | 18.33220335 | 6.60557058  | #O |
| 6.59556596 | 8.05639335  | 6.59562058  | #O |
| 4.74650596 | 16.21943335 | 5.96218058  | #O |
| 4.73424596 | 5.95738335  | 5.91705058  | #O |
| 0.96573596 | 16.21491335 | 5.97359058  | #O |
| 0.96391596 | 5.96896335  | 5.91612058  | #O |
| 2.85375596 | 0.84264335  | 5.96219058  | #O |
| 2.85777596 | 11.16704335 | 5.43353058  | #O |
| 6.63911596 | 0.84552335  | 5.96307058  | #O |
| 6.64884596 | 11.04813335 | 6.00114058  | #O |
| 2.85463596 | 14.75197335 | 5.15737058  | #O |
| 2.84844596 | 4.50495335  | 5.10585058  | #O |
| 6.64438596 | 14.77130335 | 5.17457058  | #O |
| 6.63453596 | 4.50669335  | 5.12895058  | #O |
| 4.74651596 | 19.87824335 | 5.13558058  | #O |
| 4.75990596 | 9.61409335  | 5.11011058  | #O |
| 0.96235596 | 19.87877335 | 5.13478058  | #O |
| 0.97148596 | 9.58285335  | 5.16072058  | #O |
| 2.84769596 | 17.65913335 | 4.18522058  | #O |
| 2.82518596 | 7.39647335  | 4.06625058  | #O |
| 6.63974596 | 17.66193335 | 4.18914058  | #O |
| 6.64968596 | 7.41382335  | 4.14446058  | #O |
| 4.84014596 | 12.56480335 | 4.24275058  | #O |
| 4.74648596 | 2.29206335  | 4.17328058  | #O |
| 0.86827596 | 12.55345335 | 4.26523058  | #O |
| 0.95943596 | 2.29486335  | 4.17323058  | #O |
| 4.74494596 | 14.80611335 | 3.09471058  | #O |
| 4.74028596 | 4.54637335  | 3.04374058  | #O |
| 0.96593596 | 14.79975335 | 3.10092058  | #O |
| 0.95640596 | 4.54671335  | 3.04019058  | #O |

|            |             |             |    |
|------------|-------------|-------------|----|
| 2.85406596 | 9.63103335  | 2.97974058  | #O |
| 2.85894596 | 19.90933335 | 3.06269058  | #O |
| 6.65530596 | 9.66066335  | 3.04516058  | #O |
| 6.64164596 | 19.90886335 | 3.06307058  | #O |
| 4.74535596 | 7.50363335  | 2.08073058  | #O |
| 4.74851596 | 17.75001335 | 2.14062058  | #O |
| 0.95403596 | 7.50452335  | 2.05994058  | #O |
| 0.96338596 | 17.75013335 | 2.13997058  | #O |
| 2.85524596 | 12.60161335 | 2.21752058  | #O |
| 2.85326596 | 2.38867335  | 2.12788058  | #O |
| 6.64094596 | 12.62337335 | 2.14820058  | #O |
| 6.63790596 | 2.38615335  | 2.13096058  | #O |
| 2.85011596 | 5.99383335  | 1.48382058  | #O |
| 2.85550596 | 16.24746335 | 1.55627058  | #O |
| 6.63340596 | 5.99872335  | 1.52071058  | #O |
| 6.64176596 | 16.24267335 | 1.56064058  | #O |
| 4.74478596 | 11.14014335 | 1.54520058  | #O |
| 4.74638596 | 0.89046335  | 1.53419058  | #O |
| 0.96779596 | 11.14102335 | 1.54292058  | #O |
| 0.96208596 | 0.89008335  | 1.53417058  | #O |
| 2.85499596 | 8.98243335  | 0.54255058  | #O |
| 2.85490596 | 19.21074335 | 0.61840058  | #O |
| 6.62996596 | 8.98528335  | 0.59316058  | #O |
| 6.63978596 | 19.20991335 | 0.61898058  | #O |
| 4.75107596 | 3.84400335  | 0.59667058  | #O |
| 4.73332596 | 14.08410335 | 0.66728058  | #O |
| 0.95515596 | 3.84313335  | 0.59312058  | #O |
| 0.97533596 | 14.08126335 | 0.67345058  | #O |
| 4.75230596 | 6.10311335  | 29.46647058 | #O |
| 4.74958596 | 16.34737335 | 29.51741058 | #O |
| 0.94959596 | 6.10117335  | 29.46445058 | #O |
| 0.95965596 | 16.34428335 | 29.51939058 | #O |
| 2.85392596 | 0.98568335  | 29.49161058 | #O |
| 2.85271596 | 11.24246335 | 29.48459058 | #O |
| 6.63796596 | 0.98666335  | 29.49161058 | #O |
| 6.63808596 | 11.22820335 | 29.49117058 | #O |
| 4.74415596 | 19.24329335 | 28.54571058 | #O |
| 4.74676596 | 9.01526335  | 28.50052058 | #O |
| 0.95966596 | 19.24292335 | 28.54681058 | #O |
| 0.95912596 | 9.01473335  | 28.50353058 | #O |
| 2.85368596 | 3.89074335  | 28.51855058 | #O |
| 2.85203596 | 14.13042335 | 28.57584058 | #O |
| 6.63814596 | 3.89127335  | 28.51051058 | #O |
| 6.63714596 | 14.12372335 | 28.59583058 | #O |
| 2.85154596 | 17.79060335 | 27.73256058 | #O |
| 2.85234596 | 7.56762335  | 27.69356058 | #O |
| 6.63682596 | 17.79403335 | 27.73031058 | #O |
| 6.63679596 | 7.56570335  | 27.69572058 | #O |
| 4.74587596 | 2.43699335  | 27.70960058 | #O |
| 4.74538596 | 12.69769335 | 27.72473058 | #O |
| 0.96243596 | 2.43668335  | 27.70875058 | #O |
| 0.95913596 | 12.69652335 | 27.72558058 | #O |
| 2.85108596 | 0.31045335  | 27.07939058 | #O |
| 2.85353596 | 10.58675335 | 27.05979058 | #O |
| 6.63586596 | 0.31102335  | 27.07902058 | #O |

|            |             |             |     |
|------------|-------------|-------------|-----|
| 6.63703596 | 10.58143335 | 27.07074058 | #O  |
| 4.74956596 | 15.66463335 | 27.11168058 | #O  |
| 4.74299596 | 5.44113335  | 27.05242058 | #O  |
| 0.95264596 | 15.66416335 | 27.11310058 | #O  |
| 0.96683596 | 5.44231335  | 27.04979058 | #O  |
| 1.74387596 | 10.80302335 | 7.80986058  | #O  |
| 4.03596596 | 10.85113335 | 7.72492058  | #O  |
| 2.85233596 | 16.70279335 | 5.70264058  | #Ti |
| 2.84039596 | 6.47363335  | 5.58185058  | #Ti |
| 6.64240596 | 16.71132335 | 5.70927058  | #Ti |
| 6.63437596 | 6.47274335  | 5.64933058  | #Ti |
| 4.74527596 | 1.34701335  | 5.69348058  | #Ti |
| 4.73794596 | 11.59392335 | 5.84255058  | #Ti |
| 0.96257596 | 1.34655335  | 5.69283058  | #Ti |
| 0.99697596 | 11.57949335 | 5.86987058  | #Ti |
| 4.75528596 | 14.35266335 | 5.17285058  | #Ti |
| 4.74237596 | 4.10915335  | 5.14519058  | #Ti |
| 0.95945596 | 14.33731335 | 5.18779058  | #Ti |
| 0.95609596 | 4.10680335  | 5.14284058  | #Ti |
| 2.85365596 | 19.46885335 | 5.16783058  | #Ti |
| 2.87352596 | 9.29970335  | 4.92800058  | #Ti |
| 6.63784596 | 19.47338335 | 5.16910058  | #Ti |
| 6.65430596 | 9.26062335  | 5.14666058  | #Ti |
| 2.84938596 | 7.88758335  | 2.04915058  | #Ti |
| 2.85591596 | 18.14377335 | 2.17215058  | #Ti |
| 6.63555596 | 7.91964335  | 2.13070058  | #Ti |
| 6.64185596 | 18.14328335 | 2.17295058  | #Ti |
| 4.75264596 | 13.02758335 | 2.27001058  | #Ti |
| 4.74650596 | 2.78533335  | 2.14959058  | #Ti |
| 0.95794596 | 13.02750335 | 2.27961058  | #Ti |
| 0.96186596 | 2.78684335  | 2.14668058  | #Ti |
| 4.75124596 | 5.58406335  | 1.48811058  | #Ti |
| 4.74751596 | 15.82282335 | 1.52886058  | #Ti |
| 0.94777596 | 5.58446335  | 1.48391058  | #Ti |
| 0.96500596 | 15.81839335 | 1.53271058  | #Ti |
| 2.85620596 | 10.76430335 | 1.44951058  | #Ti |
| 2.85482596 | 0.46881335  | 1.51485058  | #Ti |
| 6.64305596 | 10.73657335 | 1.50260058  | #Ti |
| 6.63935596 | 0.46867335  | 1.51524058  | #Ti |
| 2.85145596 | 19.63613335 | 28.52151058 | #Ti |
| 2.85290596 | 9.40130335  | 28.47729058 | #Ti |
| 6.63606596 | 19.63720335 | 28.52148058 | #Ti |
| 6.63689596 | 9.41251335  | 28.49549058 | #Ti |
| 4.74607596 | 4.28162335  | 28.48826058 | #Ti |
| 4.74543596 | 14.52218335 | 28.56588058 | #Ti |
| 0.96202596 | 4.28140335  | 28.48486058 | #Ti |
| 0.95952596 | 14.52211335 | 28.56713058 | #Ti |
| 4.74575596 | 17.27937335 | 27.99107058 | #Ti |
| 4.74886596 | 7.04794335  | 27.94976058 | #Ti |
| 0.95931596 | 17.27862335 | 27.99354058 | #Ti |
| 0.95523596 | 7.04824335  | 27.94885058 | #Ti |
| 2.85409596 | 1.92034335  | 27.97012058 | #Ti |
| 2.85246596 | 12.18958335 | 27.96413058 | #Ti |
| 6.63830596 | 1.92094335  | 27.96965058 | #Ti |
| 6.63732596 | 12.18448335 | 27.98026058 | #Ti |

Ana-Gly-D

1.000000000

7.569000 0.000000 0.000000  
0.000000 10.239350 0.000000  
0.000000 0.000000 25.000000

H C N O Ti

5 2 1 50 24

Cartesian

|            |            |             |    |
|------------|------------|-------------|----|
| 2.65110280 | 4.98596957 | 10.99078000 | #H |
| 5.51587091 | 8.06039584 | 12.01052000 | #H |
| 4.83416892 | 6.57905884 | 11.81100000 | #H |
| 3.58265748 | 8.13970985 | 13.34998000 | #H |
| 3.19327027 | 9.03745510 | 11.85224000 | #H |
| 2.35881073 | 7.03344023 | 11.98724000 | #C |
| 3.45767058 | 8.05424199 | 12.25786000 | #C |
| 4.71009030 | 7.57684254 | 11.60432000 | #N |
| 2.95001775 | 4.09519731 | 1.21272000  | #O |
| 6.73537305 | 4.09381500 | 1.21912000  | #O |
| 4.84083721 | 9.23301644 | 1.21092000  | #O |
| 1.05807808 | 9.23373320 | 1.21106000  | #O |
| 2.95113039 | 7.11253921 | 0.56470000  | #O |
| 6.73314776 | 7.10891448 | 0.57074000  | #O |
| 4.84337282 | 1.96029284 | 0.59870000  | #O |
| 1.05520943 | 1.95736439 | 0.60552000  | #O |
| 4.83273838 | 9.84040445 | 10.13846000 | #O |
| 1.04596768 | 9.85672597 | 10.18198000 | #O |
| 2.90847151 | 4.66310238 | 10.06862000 | #O |
| 6.72305072 | 4.67515410 | 10.05750000 | #O |
| 4.83179225 | 2.56114814 | 9.42716000  | #O |
| 1.06018226 | 2.56163963 | 9.42550000  | #O |
| 2.95643626 | 7.66159364 | 9.30698000  | #O |
| 6.73260279 | 7.64440177 | 9.46996000  | #O |
| 2.94487083 | 1.10562453 | 8.63582000  | #O |
| 6.73133877 | 1.09061365 | 8.66026000  | #O |
| 4.84151085 | 6.21662680 | 8.61282000  | #O |
| 1.05499750 | 6.21743571 | 8.57474000  | #O |
| 2.96907649 | 3.99118600 | 7.63536000  | #O |
| 6.73274660 | 3.98353720 | 7.64656000  | #O |
| 4.86956913 | 9.11905248 | 7.75104000  | #O |
| 1.04576332 | 9.11045142 | 7.80266000  | #O |
| 4.84269161 | 1.11966268 | 6.58260000  | #O |
| 1.05451308 | 1.11286375 | 6.60106000  | #O |
| 2.96021319 | 6.22354861 | 6.51888000  | #O |
| 6.72557119 | 6.21497827 | 6.52636000  | #O |
| 4.84885278 | 4.05941079 | 5.59179000  | #O |
| 1.06374726 | 4.06057807 | 5.60641000  | #O |
| 2.95116067 | 9.15386627 | 5.71107000  | #O |
| 6.73787839 | 9.15789033 | 5.70391000  | #O |
| 2.95263662 | 2.54820560 | 5.03367000  | #O |
| 6.74139797 | 2.54538978 | 5.03914000  | #O |
| 4.84052688 | 7.70091274 | 5.02173000  | #O |
| 1.06274815 | 7.69416501 | 5.04239000  | #O |
| 2.95009344 | 5.53137878 | 4.08017000  | #O |

|            |            |             |     |
|------------|------------|-------------|-----|
| 6.74391088 | 5.52923876 | 4.08797000  | #O  |
| 4.84376641 | 0.38264963 | 4.16056000  | #O  |
| 1.06339152 | 0.37850986 | 4.17991000  | #O  |
| 4.84310034 | 2.64513129 | 3.00094000  | #O  |
| 1.05862305 | 2.64401520 | 3.00682000  | #O  |
| 2.94119230 | 7.78114829 | 2.98290000  | #O  |
| 6.73790866 | 7.77521970 | 2.98670000  | #O  |
| 4.84247211 | 5.54988129 | 2.01452000  | #O  |
| 1.05912260 | 5.54925669 | 2.01150000  | #O  |
| 2.94972256 | 0.42234042 | 2.08048000  | #O  |
| 6.73469941 | 0.42106972 | 2.08518000  | #O  |
| 1.27303011 | 7.38201843 | 11.38760000 | #O  |
| 2.58078679 | 5.84444691 | 12.33574000 | #O  |
| 4.84534833 | 3.57471068 | 1.47484000  | #Ti |
| 1.05568628 | 3.57279592 | 1.47868000  | #Ti |
| 2.94735346 | 8.72141756 | 1.45644000  | #Ti |
| 6.73451775 | 8.71511012 | 1.46788000  | #Ti |
| 2.95041891 | 2.99717038 | 9.10934000  | #Ti |
| 6.73753021 | 3.06010142 | 9.17466000  | #Ti |
| 4.85558162 | 8.14348817 | 9.36246000  | #Ti |
| 1.03279005 | 8.15447499 | 9.48508000  | #Ti |
| 4.85654288 | 0.66918043 | 8.65984000  | #Ti |
| 1.03614312 | 0.65797039 | 8.66774000  | #Ti |
| 2.91402716 | 5.92866556 | 8.42998000  | #Ti |
| 6.72028803 | 5.82105000 | 8.60222000  | #Ti |
| 2.95421098 | 4.42901036 | 5.59453000  | #Ti |
| 6.74381248 | 4.45679996 | 5.62751000  | #Ti |
| 4.84758876 | 9.56929718 | 5.76504000  | #Ti |
| 1.05594362 | 9.55847418 | 5.81366000  | #Ti |
| 4.85602819 | 2.12028268 | 5.01349000  | #Ti |
| 1.05468717 | 2.10287579 | 5.01693000  | #Ti |
| 2.94932897 | 7.31150002 | 4.94151000  | #Ti |
| 6.73600884 | 7.28172399 | 4.99295000  | #Ti |
| 2.95022211 | 5.93384668 | 1.98940000  | #Ti |
| 6.73544874 | 5.94183337 | 2.00334000  | #Ti |
| 4.84231316 | 0.81514953 | 2.05280000  | #Ti |
| 1.05639019 | 0.81471027 | 2.06296000  | #Ti |

Ana-Met-Z

1.000000000

7.569000 0.000000 0.000000

0.000000 20.478700 0.000000

0.000000 0.000000 30.000000

H C N O S Ti

11 5 1 98 1 48

Cartesian

3.97953645 8.46998380 7.86771101 #H

5.29766645 9.23770380 8.62650101 #H

4.50729645 8.04734380 9.51326101 #H

2.48119645 9.39448380 9.56612101 #H

4.91218645 11.18644380 10.22042101 #H

3.24002645 11.59035380 10.56480101 #H

3.12487645 9.55661380 12.15021101 #H

4.90205645 9.42772380 11.98142101 #H



|            |             |             |    |
|------------|-------------|-------------|----|
| 5.50371645 | 10.11077380 | 14.60461101 | #H |
| 4.64036645 | 11.47281380 | 15.36537101 | #H |
| 3.72793645 | 10.01564380 | 14.89807101 | #H |
| 3.28089645 | 10.80659380 | 8.11868101  | #C |
| 3.43646645 | 9.88724380  | 9.34257101  | #C |
| 3.94508645 | 10.74341380 | 10.50486101 | #C |
| 4.04217645 | 10.11193380 | 11.89573101 | #C |
| 4.56075645 | 10.67345380 | 14.61681101 | #C |
| 4.38298645 | 8.81863380  | 8.85154101  | #N |
| 5.13641645 | 3.21517380  | 6.52625101  | #O |
| 5.14772645 | 13.49947380 | 6.56917101  | #O |
| 1.36012645 | 3.21576380  | 6.52710101  | #O |
| 1.36250645 | 13.48922380 | 6.59292101  | #O |
| 3.24976645 | 18.57296380 | 6.55035101  | #O |
| 3.32648645 | 8.30807380  | 6.51913101  | #O |
| 7.03333645 | 18.58369380 | 6.55705101  | #O |
| 6.98721645 | 8.29936380  | 6.55288101  | #O |
| 5.13974645 | 16.46526380 | 5.91463101  | #O |
| 5.13434645 | 6.19490380  | 5.88314101  | #O |
| 1.35834645 | 16.46147380 | 5.92512101  | #O |
| 1.35856645 | 6.20911380  | 5.88311101  | #O |
| 3.24748645 | 1.09245380  | 5.90262101  | #O |
| 3.24499645 | 11.42072380 | 5.35136101  | #O |
| 7.03256645 | 1.09751380  | 5.90062101  | #O |
| 7.03764645 | 11.29786380 | 5.93253101  | #O |
| 3.24686645 | 15.00218380 | 5.09804101  | #O |
| 3.24509645 | 4.76018380  | 5.05084101  | #O |
| 7.03585645 | 15.02833380 | 5.10476101  | #O |
| 7.03156645 | 4.75415380  | 5.06112101  | #O |
| 5.13934645 | 20.12472380 | 5.08550101  | #O |
| 5.14890645 | 9.85141380  | 5.07834101  | #O |
| 1.35562645 | 20.12584380 | 5.08433101  | #O |
| 1.36337645 | 9.82043380  | 5.13058101  | #O |
| 3.24548645 | 17.90327380 | 4.13706101  | #O |
| 3.22681645 | 7.64480380  | 4.05322101  | #O |
| 7.03513645 | 17.90847380 | 4.14283101  | #O |
| 7.04432645 | 7.65170380  | 4.10498101  | #O |
| 5.23885645 | 12.81091380 | 4.17497101  | #O |
| 5.13607645 | 2.53758380  | 4.11066101  | #O |
| 1.25468645 | 12.80083380 | 4.19931101  | #O |
| 1.35690645 | 2.54189380  | 4.11297101  | #O |
| 5.13220645 | 15.04554380 | 3.03701101  | #O |
| 5.13462645 | 4.78544380  | 2.97947101  | #O |
| 1.36384645 | 15.03904380 | 3.04632101  | #O |
| 1.34819645 | 4.78616380  | 2.97651101  | #O |
| 3.24432645 | 9.86585380  | 2.94751101  | #O |
| 3.24422645 | 20.15038380 | 3.01100101  | #O |
| 7.04264645 | 9.89738380  | 3.00343101  | #O |
| 7.02690645 | 20.14959380 | 3.01129101  | #O |
| 5.13708645 | 7.73388380  | 2.04667101  | #O |
| 5.13625645 | 17.98770380 | 2.09755101  | #O |
| 1.34712645 | 7.73739380  | 2.02593101  | #O |
| 1.35102645 | 17.98766380 | 2.09832101  | #O |
| 3.24522645 | 12.83898380 | 2.15800101  | #O |
| 3.24264645 | 2.62856380  | 2.06228101  | #O |

|            |             |             |     |
|------------|-------------|-------------|-----|
| 7.03182645 | 12.86171380 | 2.08096101  | #O  |
| 7.02755645 | 2.62512380  | 2.06872101  | #O  |
| 3.24164645 | 6.23434380  | 1.43263101  | #O  |
| 3.24337645 | 16.48939380 | 1.50234101  | #O  |
| 7.02557645 | 6.24161380  | 1.45350101  | #O  |
| 7.02969645 | 16.48129380 | 1.51298101  | #O  |
| 5.13462645 | 11.37064380 | 1.50532101  | #O  |
| 5.13507645 | 1.12608380  | 1.47990101  | #O  |
| 1.35846645 | 11.37127380 | 1.49927101  | #O  |
| 1.35061645 | 1.12571380  | 1.48153101  | #O  |
| 3.24983645 | 9.21127380  | 0.50991101  | #O  |
| 3.23993645 | 19.44564380 | 0.56834101  | #O  |
| 7.02051645 | 9.21521380  | 0.55227101  | #O  |
| 7.02525645 | 19.44390380 | 0.56963101  | #O  |
| 5.13858645 | 4.08142380  | 0.53194101  | #O  |
| 5.12314645 | 14.32295380 | 0.61220101  | #O  |
| 1.34303645 | 4.07937380  | 0.52983101  | #O  |
| 1.36594645 | 14.32109380 | 0.62130101  | #O  |
| 5.13736645 | 6.33873380  | 29.40544101 | #O  |
| 5.13933645 | 16.58347380 | 29.46864101 | #O  |
| 1.34266645 | 6.33599380  | 29.40219101 | #O  |
| 1.34604645 | 16.58204380 | 29.47350101 | #O  |
| 3.24010645 | 1.21576380  | 29.43518101 | #O  |
| 3.24724645 | 11.46817380 | 29.44411101 | #O  |
| 7.02490645 | 1.21651380  | 29.43570101 | #O  |
| 7.02469645 | 11.45453380 | 29.44625101 | #O  |
| 5.13187645 | 19.47797380 | 28.49421101 | #O  |
| 5.13269645 | 9.24396380  | 28.45985101 | #O  |
| 1.34731645 | 19.47793380 | 28.49531101 | #O  |
| 1.34560645 | 9.24252380  | 28.46770101 | #O  |
| 3.23861645 | 4.12139380  | 28.45307101 | #O  |
| 3.24121645 | 14.35955380 | 28.53262101 | #O  |
| 7.02282645 | 4.12234380  | 28.44682101 | #O  |
| 7.02541645 | 14.35420380 | 28.54801101 | #O  |
| 3.23981645 | 18.02016380 | 27.68524101 | #O  |
| 3.23815645 | 7.80448380  | 27.63223101 | #O  |
| 7.02553645 | 18.02452380 | 27.68066101 | #O  |
| 7.02350645 | 7.80223380  | 27.63419101 | #O  |
| 5.13007645 | 2.66571380  | 27.65104101 | #O  |
| 5.13348645 | 12.92666380 | 27.68513101 | #O  |
| 1.34618645 | 2.66511380  | 27.65043101 | #O  |
| 1.34818645 | 12.92644380 | 27.68923101 | #O  |
| 3.23769645 | 0.53689380  | 27.02433101 | #O  |
| 3.23572645 | 10.81659380 | 27.01946101 | #O  |
| 7.02241645 | 0.53808380  | 27.02434101 | #O  |
| 7.02769645 | 10.81149380 | 27.02658101 | #O  |
| 5.13538645 | 15.89572380 | 27.06461101 | #O  |
| 5.12714645 | 5.67518380  | 26.99105101 | #O  |
| 1.34436645 | 15.89401380 | 27.06961101 | #O  |
| 1.34733645 | 5.67453380  | 26.98819101 | #O  |
| 2.12100645 | 11.11038380 | 7.73643101  | #O  |
| 4.41639645 | 11.13429380 | 7.63879101  | #O  |
| 4.25833645 | 11.50762380 | 13.04675101 | #S  |
| 3.24662645 | 16.94989380 | 5.65618101  | #Ti |
| 3.24132645 | 6.72443380  | 5.57310101  | #Ti |

|            |             |             |     |
|------------|-------------|-------------|-----|
| 7.03558645 | 16.96029380 | 5.66389101  | #Ti |
| 7.03077645 | 6.71189380  | 5.61242101  | #Ti |
| 5.13828645 | 1.59648380  | 5.63187101  | #Ti |
| 5.13068645 | 11.84184380 | 5.76859101  | #Ti |
| 1.35680645 | 1.59665380  | 5.63276101  | #Ti |
| 1.38132645 | 11.83087380 | 5.80096101  | #Ti |
| 5.14804645 | 14.60551380 | 5.10939101  | #Ti |
| 5.13777645 | 4.35905380  | 5.08239101  | #Ti |
| 1.35000645 | 14.59225380 | 5.12455101  | #Ti |
| 1.35498645 | 4.35817380  | 5.08304101  | #Ti |
| 3.24791645 | 19.71571380 | 5.11600101  | #Ti |
| 3.26260645 | 9.54449380  | 4.90049101  | #Ti |
| 7.03227645 | 19.72145380 | 5.11807101  | #Ti |
| 7.04325645 | 9.49686380  | 5.10524101  | #Ti |
| 3.24135645 | 8.12233380  | 2.02103101  | #Ti |
| 3.24215645 | 18.38236380 | 2.12456101  | #Ti |
| 7.02700645 | 8.15243380  | 2.09079101  | #Ti |
| 7.02821645 | 18.38131380 | 2.12637101  | #Ti |
| 5.14368645 | 13.26374380 | 2.21058101  | #Ti |
| 5.13508645 | 3.02437380  | 2.08670101  | #Ti |
| 1.34894645 | 13.26258380 | 2.22427101  | #Ti |
| 1.35025645 | 3.02580380  | 2.08563101  | #Ti |
| 5.14274645 | 5.82430380  | 1.42581101  | #Ti |
| 5.13550645 | 16.06473380 | 1.47619101  | #Ti |
| 1.34064645 | 5.82409380  | 1.42211101  | #Ti |
| 1.35382645 | 16.05966380 | 1.48218101  | #Ti |
| 3.24704645 | 10.99311380 | 1.41218101  | #Ti |
| 3.24313645 | 0.70586380  | 1.46065101  | #Ti |
| 7.03329645 | 10.96797380 | 1.45886101  | #Ti |
| 7.02791645 | 0.70501380  | 1.46122101  | #Ti |
| 3.23948645 | 19.86659380 | 28.47096101 | #Ti |
| 3.23904645 | 9.63166380  | 28.43647101 | #Ti |
| 7.02421645 | 19.86783380 | 28.47074101 | #Ti |
| 7.02377645 | 9.64190380  | 28.45089101 | #Ti |
| 5.13020645 | 4.51327380  | 28.42686101 | #Ti |
| 5.13397645 | 14.75350380 | 28.52078101 | #Ti |
| 1.34620645 | 4.51267380  | 28.42375101 | #Ti |
| 1.34832645 | 14.75300380 | 28.52587101 | #Ti |
| 5.13433645 | 17.51109380 | 27.94062101 | #Ti |
| 5.13525645 | 7.28228380  | 27.88868101 | #Ti |
| 1.34773645 | 17.50994380 | 27.94490101 | #Ti |
| 1.34300645 | 7.28173380  | 27.88701101 | #Ti |
| 3.23892645 | 2.14799380  | 27.91189101 | #Ti |
| 3.24198645 | 12.41922380 | 27.92611101 | #Ti |
| 7.02312645 | 2.14896380  | 27.91210101 | #Ti |
| 7.02630645 | 12.41425380 | 27.93801101 | #Ti |

Ana-Glu-D

1.000000000

7.569000 0.000000 0.000000

0.000000 20.478700 0.000000

0.000000 0.000000 25.000000

H C N O Ti

10 5 2 99 48

Cartesian

|            |             |             |    |
|------------|-------------|-------------|----|
| 6.85240747 | 6.72544487  | 8.34886321  | #H |
| 6.31734747 | 5.15400487  | 8.30967321  | #H |
| 4.98458747 | 6.21370487  | 9.92184321  | #H |
| 4.10390747 | 3.38845487  | 7.33105321  | #H |
| 4.24615747 | 8.15994487  | 7.65481321  | #H |
| 3.38049747 | 7.98848487  | 9.15924321  | #H |
| 5.22265747 | 9.01869487  | 10.42420321 | #H |
| 6.35055747 | 8.79684487  | 9.07837321  | #H |
| 5.43432747 | 12.36134487 | 8.99502321  | #H |
| 6.06881747 | 11.33174487 | 10.26006321 | #H |
| 3.77895747 | 5.41362487  | 8.36390321  | #C |
| 4.83985747 | 6.47178487  | 8.85476321  | #C |
| 4.38251747 | 7.91857487  | 8.71195321  | #C |
| 5.29228747 | 8.99021487  | 9.32441321  | #C |
| 5.01459747 | 10.38042487 | 8.75690321  | #C |
| 6.06660747 | 6.12393487  | 8.09170321  | #N |
| 5.53036747 | 11.43740487 | 9.40997321  | #N |
| 6.33188747 | 8.22502487  | 6.41190321  | #O |
| 6.25073747 | 18.37267487 | 6.42663321  | #O |
| 2.34513747 | 8.22577487  | 6.44655321  | #O |
| 2.47275747 | 18.37243487 | 6.42517321  | #O |
| 4.30081747 | 3.01212487  | 6.39711321  | #O |
| 4.39281747 | 13.25892487 | 6.56943321  | #O |
| 0.56821747 | 3.01299487  | 6.39132321  | #O |
| 0.56698747 | 13.23300487 | 6.47835321  | #O |
| 6.24523747 | 0.89283487  | 5.75899321  | #O |
| 6.27604747 | 11.11612487 | 5.80192321  | #O |
| 2.46942747 | 0.88815487  | 5.74700321  | #O |
| 2.43867747 | 11.12465487 | 5.80219321  | #O |
| 4.36091747 | 6.03738487  | 5.62176321  | #O |
| 4.36772747 | 16.24919487 | 5.82873321  | #O |
| 0.55593747 | 5.99170487  | 5.80629321  | #O |
| 0.58125747 | 16.25172487 | 5.80971321  | #O |
| 4.35913747 | 19.94005487 | 4.94354321  | #O |
| 4.35241747 | 9.68752487  | 4.94525321  | #O |
| 0.57339747 | 19.90820487 | 4.96363321  | #O |
| 0.57312747 | 9.71967487  | 4.87243321  | #O |
| 6.24114747 | 4.55917487  | 4.96241321  | #O |
| 6.25502747 | 14.78782487 | 5.03540321  | #O |
| 2.45565747 | 4.56781487  | 4.91801321  | #O |
| 2.48047747 | 14.78036487 | 5.05339321  | #O |
| 4.38192747 | 2.33834487  | 3.96729321  | #O |
| 4.35583747 | 12.55798487 | 4.16908321  | #O |
| 0.57038747 | 2.32923487  | 3.97817321  | #O |
| 0.57680747 | 12.59978487 | 4.05166321  | #O |
| 6.24807747 | 17.69043487 | 4.02062321  | #O |
| 6.25831747 | 7.44841487  | 4.04315321  | #O |
| 2.48203747 | 17.68488487 | 4.01965321  | #O |
| 2.46236747 | 7.44353487  | 4.08933321  | #O |
| 6.25901747 | 19.92992487 | 2.88034321  | #O |
| 6.24722747 | 9.68722487  | 2.88721321  | #O |
| 2.46929747 | 19.92858487 | 2.88300321  | #O |
| 2.47211747 | 9.68365487  | 2.90105321  | #O |
| 4.36442747 | 14.80487487 | 2.97240321  | #O |

|            |             |             |    |
|------------|-------------|-------------|----|
| 4.36780747 | 4.56996487  | 2.84960321  | #O |
| 0.58756747 | 14.82028487 | 2.94235321  | #O |
| 0.55813747 | 4.56314487  | 2.86013321  | #O |
| 6.25309747 | 12.62641487 | 2.04598321  | #O |
| 6.25909747 | 2.40383487  | 1.92526321  | #O |
| 2.47359747 | 12.62864487 | 2.04410321  | #O |
| 2.47389747 | 2.40293487  | 1.94208321  | #O |
| 4.36750747 | 17.77003487 | 1.97360321  | #O |
| 4.36263747 | 7.50355487  | 1.98892321  | #O |
| 0.58296747 | 17.76583487 | 1.97618321  | #O |
| 0.58089747 | 7.50501487  | 1.99536321  | #O |
| 4.36238747 | 11.15081487 | 1.41069321  | #O |
| 4.36663747 | 0.90705487  | 1.34072321  | #O |
| 0.58078747 | 11.15756487 | 1.38992321  | #O |
| 0.58294747 | 0.90475487  | 1.34773321  | #O |
| 6.25616747 | 16.25580487 | 1.41656321  | #O |
| 6.25245747 | 6.03494487  | 1.33867321  | #O |
| 2.47864747 | 16.25754487 | 1.41138321  | #O |
| 2.47336747 | 6.02510487  | 1.36132321  | #O |
| 4.36394747 | 14.08753487 | 0.54153321  | #O |
| 4.36208747 | 3.86998487  | 0.40633321  | #O |
| 0.57756747 | 14.10217487 | 0.50178321  | #O |
| 0.58818747 | 3.86993487  | 0.41607321  | #O |
| 6.26092747 | 8.97811487  | 0.47094321  | #O |
| 6.26378747 | 19.22036487 | 0.43855321  | #O |
| 2.47716747 | 8.97429487  | 0.48831321  | #O |
| 2.47646747 | 19.22208487 | 0.44030321  | #O |
| 6.24993747 | 11.23380487 | 24.35293321 | #O |
| 6.26497747 | 0.99273487  | 24.30544321 | #O |
| 2.47300747 | 11.23229487 | 24.35749321 | #O |
| 2.47548747 | 0.99486487  | 24.30790321 | #O |
| 4.36393747 | 6.12133487  | 24.30403321 | #O |
| 4.37184747 | 16.34121487 | 24.37529321 | #O |
| 0.58789747 | 6.11749487  | 24.30856321 | #O |
| 0.58420747 | 16.35165487 | 24.36325321 | #O |
| 6.26173747 | 3.89781487  | 23.33969321 | #O |
| 6.25781747 | 14.12109487 | 23.43695321 | #O |
| 2.47733747 | 3.89726487  | 23.33500321 | #O |
| 2.47348747 | 14.12076487 | 23.43912321 | #O |
| 4.36822747 | 9.00669487  | 23.39908321 | #O |
| 4.36972747 | 19.24985487 | 23.36753321 | #O |
| 0.58384747 | 9.00648487  | 23.40301321 | #O |
| 0.58466747 | 19.25276487 | 23.35807321 | #O |
| 4.37043747 | 2.44920487  | 22.52564321 | #O |
| 4.36588747 | 12.68658487 | 22.58509321 | #O |
| 0.58507747 | 2.44759487  | 22.52817321 | #O |
| 0.58194747 | 12.68909487 | 22.57888321 | #O |
| 6.25850747 | 7.58074487  | 22.53790321 | #O |
| 6.26031747 | 17.78865487 | 22.57777321 | #O |
| 2.47644747 | 7.58106487  | 22.53965321 | #O |
| 2.47978747 | 17.78908487 | 22.58131321 | #O |
| 4.36967747 | 5.45889487  | 21.88523321 | #O |
| 4.36684747 | 15.65748487 | 21.97110321 | #O |
| 0.58352747 | 5.45810487  | 21.89038321 | #O |
| 0.58485747 | 15.66439487 | 21.95498321 | #O |

|            |             |             |     |
|------------|-------------|-------------|-----|
| 6.25642747 | 0.31868487  | 21.89408321 | #O  |
| 6.26631747 | 10.56307487 | 21.94301321 | #O  |
| 2.48058747 | 0.31749487  | 21.89712321 | #O  |
| 2.47798747 | 10.56018487 | 21.95011321 | #O  |
| 2.73998747 | 5.81559487  | 7.74282321  | #O  |
| 4.11391747 | 4.22896487  | 8.60711321  | #O  |
| 4.36059747 | 10.53366487 | 7.70352321  | #O  |
| 4.36387747 | 1.36069487  | 5.44414321  | #Ti |
| 4.34146747 | 11.57653487 | 5.77302321  | #Ti |
| 0.57688747 | 1.40965487  | 5.50241321  | #Ti |
| 0.57536747 | 11.62144487 | 5.54908321  | #Ti |
| 6.25400747 | 6.54646487  | 5.64463321  | #Ti |
| 6.24687747 | 16.74341487 | 5.54178321  | #Ti |
| 2.42255747 | 6.53865487  | 5.74899321  | #Ti |
| 2.48721747 | 16.74219487 | 5.54384321  | #Ti |
| 6.26520747 | 19.50487487 | 4.98435321  | #Ti |
| 6.24822747 | 9.31462487  | 4.92132321  | #Ti |
| 2.45193747 | 19.50517487 | 4.98188321  | #Ti |
| 2.45743747 | 9.28490487  | 4.93486321  | #Ti |
| 4.32708747 | 4.29078487  | 4.77154321  | #Ti |
| 4.37164747 | 14.33681487 | 5.08031321  | #Ti |
| 0.55523747 | 4.17752487  | 4.94143321  | #Ti |
| 0.58322747 | 14.39209487 | 5.05265321  | #Ti |
| 4.35919747 | 13.02724487 | 2.14462321  | #Ti |
| 4.36822747 | 2.78647487  | 1.92359321  | #Ti |
| 0.58370747 | 13.04094487 | 2.05336321  | #Ti |
| 0.58167747 | 2.81331487  | 1.95859321  | #Ti |
| 6.25352747 | 18.15920487 | 1.99368321  | #Ti |
| 6.26013747 | 7.92292487  | 2.04270321  | #Ti |
| 2.48287747 | 18.15777487 | 1.99453321  | #Ti |
| 2.46817747 | 7.91398487  | 2.09056321  | #Ti |
| 6.25150747 | 10.74714487 | 1.34220321  | #Ti |
| 6.26784747 | 0.48095487  | 1.32623321  | #Ti |
| 2.47587747 | 10.72675487 | 1.34355321  | #Ti |
| 2.46549747 | 0.48182487  | 1.32962321  | #Ti |
| 4.36734747 | 15.81214487 | 1.40203321  | #Ti |
| 4.35965747 | 5.65751487  | 1.26488321  | #Ti |
| 0.58269747 | 15.84632487 | 1.39487321  | #Ti |
| 0.57731747 | 5.62742487  | 1.31595321  | #Ti |
| 4.37003747 | 4.28185487  | 23.30814321 | #Ti |
| 4.36590747 | 14.51771487 | 23.42551321 | #Ti |
| 0.58614747 | 4.29074487  | 23.32077321 | #Ti |
| 0.58223747 | 14.52106487 | 23.40331321 | #Ti |
| 6.26143747 | 9.40333487  | 23.38251321 | #Ti |
| 6.26015747 | 19.64137487 | 23.33603321 | #Ti |
| 2.47586747 | 9.40322487  | 23.39430321 | #Ti |
| 2.47839747 | 19.64091487 | 23.33987321 | #Ti |
| 6.26525747 | 1.92710487  | 22.78390321 | #Ti |
| 6.25612747 | 12.17583487 | 22.83150321 | #Ti |
| 2.47514747 | 1.92657487  | 22.78508321 | #Ti |
| 2.47392747 | 12.17324487 | 22.83445321 | #Ti |
| 4.36620747 | 7.06829487  | 22.78090321 | #Ti |
| 4.37057747 | 17.27210487 | 22.84921321 | #Ti |
| 0.58411747 | 7.06355487  | 22.79247321 | #Ti |
| 0.58552747 | 17.27910487 | 22.83900321 | #Ti |

Ana-Cys-Z

1.000000000

7.569000 0.000000 0.000000  
0.000000 10.239350 0.000000  
0.000000 0.000000 25.000000

H C N O S Ti

7 3 1 50 1 24

Cartesian

|            |             |             |    |
|------------|-------------|-------------|----|
| 4.05151000 | 3.42504996  | 7.85832014  | #H |
| 5.32349000 | 4.27338996  | 8.59369014  | #H |
| 4.64681000 | 3.02642996  | 9.50198014  | #H |
| 2.48323000 | 4.18627996  | 9.44138014  | #H |
| 4.82042000 | 5.85770996  | 10.56164014 | #H |
| 3.10336000 | 6.11410996  | 10.95949014 | #H |
| 4.95235000 | 4.63975996  | 12.68331014 | #H |
| 3.28312000 | 5.80228996  | 8.24102014  | #C |
| 3.42954000 | 4.73581996  | 9.34973014  | #C |
| 3.84887000 | 5.35943996  | 10.67705014 | #C |
| 4.45100000 | 3.77300996  | 8.82506014  | #N |
| 5.10400000 | 8.56172996  | 6.67116014  | #O |
| 1.32690000 | 8.54433996  | 6.69962014  | #O |
| 3.27195000 | 3.37102996  | 6.56140014  | #O |
| 6.94504000 | 3.37248996  | 6.64971014  | #O |
| 5.08672000 | 1.27620996  | 5.96786014  | #O |
| 1.31868000 | 1.28359996  | 5.98264014  | #O |
| 3.21011000 | 6.46332996  | 5.50178014  | #O |
| 6.99971000 | 6.35147996  | 6.05674014  | #O |
| 3.19985000 | 10.04144996 | 5.17034014  | #O |
| 6.99371000 | 10.06914996 | 5.20122014  | #O |
| 5.10905000 | 4.91692996  | 5.16447014  | #O |
| 1.32136000 | 4.89358996  | 5.20936014  | #O |
| 3.17418000 | 2.69484996  | 4.12192014  | #O |
| 7.00449000 | 2.71483996  | 4.20015014  | #O |
| 5.18935000 | 7.85032996  | 4.27990014  | #O |
| 1.22286000 | 7.84196996  | 4.30982014  | #O |
| 5.09053000 | 10.08627996 | 3.11699014  | #O |
| 1.31472000 | 10.08075996 | 3.12199014  | #O |
| 3.20136000 | 4.91976996  | 3.03352014  | #O |
| 6.99666000 | 4.94956996  | 3.09561014  | #O |
| 5.09437000 | 2.78410996  | 2.13589014  | #O |
| 1.30282000 | 2.78725996  | 2.11169014  | #O |
| 3.20078000 | 7.88124996  | 2.25638014  | #O |
| 6.98829000 | 7.90106996  | 2.19969014  | #O |
| 3.19975000 | 1.26888996  | 1.54265014  | #O |
| 6.98425000 | 1.27212996  | 1.57992014  | #O |
| 5.09089000 | 6.41864996  | 1.58230014  | #O |
| 1.31299000 | 6.41761996  | 1.58177014  | #O |
| 3.20206000 | 4.25930996  | 0.59771014  | #O |
| 6.97726000 | 4.26056996  | 0.64512014  | #O |
| 5.08722000 | 9.34936996  | 0.68986014  | #O |
| 1.31337000 | 9.34616996  | 0.69600014  | #O |
| 5.09992000 | 1.37676996  | 24.53030014 | #O |
| 1.29636000 | 1.37130996  | 24.53148014 | #O |

|            |            |             |     |
|------------|------------|-------------|-----|
| 3.20023000 | 6.51633996 | 24.52712014 | #O  |
| 6.98467000 | 6.50419996 | 24.53199014 | #O  |
| 5.09359000 | 4.28199996 | 23.55238014 | #O  |
| 1.30528000 | 4.27950996 | 23.55874014 | #O  |
| 3.19940000 | 9.39974996 | 23.60294014 | #O  |
| 6.98440000 | 9.39785996 | 23.60728014 | #O  |
| 3.19833000 | 2.83023996 | 22.74827014 | #O  |
| 6.98390000 | 2.83015996 | 22.74839014 | #O  |
| 5.09206000 | 7.96309996 | 22.75095014 | #O  |
| 1.30764000 | 7.96276996 | 22.75015014 | #O  |
| 3.19962000 | 5.84355996 | 22.10689014 | #O  |
| 6.98678000 | 5.84060996 | 22.11592014 | #O  |
| 5.09245000 | 0.69636996 | 22.12590014 | #O  |
| 1.31044000 | 0.69667996 | 22.12635014 | #O  |
| 2.12203000 | 6.13955996 | 7.89138014  | #O  |
| 4.41604000 | 6.18275996 | 7.79286014  | #O  |
| 3.96213000 | 4.06513996 | 11.97152014 | #S  |
| 3.19026000 | 1.76052996 | 5.63770014  | #Ti |
| 6.99060000 | 1.77093996 | 5.70888014  | #Ti |
| 5.09290000 | 6.89086996 | 5.88781014  | #Ti |
| 1.35040000 | 6.87566996 | 5.91781014  | #Ti |
| 5.10371000 | 9.64500996 | 5.19704014  | #Ti |
| 1.30384000 | 9.62518996 | 5.21702014  | #Ti |
| 3.21878000 | 4.58487996 | 4.99128014  | #Ti |
| 6.99995000 | 4.55597996 | 5.20145014  | #Ti |
| 3.19746000 | 3.15428996 | 2.11092014  | #Ti |
| 6.98389000 | 3.18328996 | 2.18849014  | #Ti |
| 5.09829000 | 8.29579996 | 2.30179014  | #Ti |
| 1.30541000 | 8.29914996 | 2.30820014  | #Ti |
| 5.09999000 | 0.84363996 | 1.54537014  | #Ti |
| 1.29995000 | 0.84113996 | 1.54869014  | #Ti |
| 3.20144000 | 6.02704996 | 1.50032014  | #Ti |
| 6.98849000 | 6.00165996 | 1.55156014  | #Ti |
| 3.19973000 | 4.66485996 | 23.53328014 | #Ti |
| 6.98405000 | 4.67740996 | 23.55072014 | #Ti |
| 5.09233000 | 9.78898996 | 23.58091014 | #Ti |
| 1.30757000 | 9.78917996 | 23.57921014 | #Ti |
| 5.09617000 | 2.30951996 | 23.00716014 | #Ti |
| 1.30153000 | 2.30925996 | 23.01052014 | #Ti |
| 3.19990000 | 7.44992996 | 23.00271014 | #Ti |
| 6.98477000 | 7.44642996 | 23.01564014 | #Ti |

Ana-His-D

1.000000000

15.138000 0.000000 0.000000

0.000000 20.478700 0.000000

0.000000 0.000000 30.000000

H C N O Ti

9 6 3 194 96

Cartesian

6.31819957 5.10413127 7.60715507 #H

9.01981788 8.58080017 8.57245607 #H

8.48835449 7.00869133 8.62322507 #H

7.10772196 8.28209785 10.05353507 #H



|             |             |                |
|-------------|-------------|----------------|
| 5.40298637  | 9.76809376  | 8.90062607 #H  |
| 8.13577533  | 10.56981439 | 11.01938507 #H |
| 7.59927492  | 14.19814854 | 8.90115407 #H  |
| 8.58732522  | 13.08361577 | 10.97270507 #H |
| 6.40916381  | 9.81959769  | 7.48661507 #H  |
| 6.00446452  | 7.21853657  | 8.56086407 #C  |
| 6.98433212  | 8.35917968  | 8.95741607 #C  |
| 6.45376036  | 9.74509618  | 8.57226407 #C  |
| 7.11367119  | 10.99949847 | 9.06154607 #C  |
| 7.81810440  | 11.23037534 | 10.22102507 #C |
| 7.53787489  | 13.14126331 | 9.14037407 #C  |
| 8.26459517  | 7.95204265  | 8.28745607 #N  |
| 6.94922710  | 12.21912793 | 8.38495607 #N  |
| 8.07831451  | 12.58706873 | 10.25162507 #N |
| 8.61158538  | 9.90190159  | 6.63262508 #O  |
| 0.85447151  | 9.75912409  | 6.66912497 #O  |
| 8.40325471  | 20.00560068 | 6.69253517 #O  |
| 0.84750803  | 20.00611265 | 6.69568517 #O  |
| 4.34206991  | 9.86694445  | 6.67703507 #O  |
| 12.19059308 | 9.75824351  | 6.67093517 #O  |
| 4.64081834  | 20.00336850 | 6.69132497 #O  |
| 12.19695104 | 20.00676796 | 6.69637517 #O  |
| 6.47106309  | 4.68857749  | 6.68242517 #O  |
| 14.08369081 | 4.63600867  | 6.67461497 #O  |
| 6.54030431  | 14.86462783 | 6.84561497 #O  |
| 14.09455989 | 14.88266957 | 6.71827517 #O  |
| 10.29999312 | 4.64845972  | 6.67892507 #O  |
| 2.74037868  | 4.65001610  | 6.65925497 #O  |
| 10.32124688 | 14.87306506 | 6.72085517 #O  |
| 2.71132886  | 14.88168659 | 6.73698497 #O  |
| 8.40413422  | 2.53821160  | 6.04079507 #O  |
| 0.84647864  | 2.52115284  | 6.03569507 #O  |
| 8.46673440  | 12.78575308 | 5.97956507 #O  |
| 0.83541276  | 12.73730047 | 6.11435507 #O  |
| 4.63300713  | 2.53178129  | 6.03278507 #O  |
| 12.19489227 | 2.52051800  | 6.04115507 #O  |
| 4.59233133  | 12.75270046 | 6.09884507 #O  |
| 12.22410861 | 12.73809914 | 6.10607507 #O  |
| 6.54240849  | 7.71620994  | 5.86763507 #O  |
| 14.08254032 | 7.62731190  | 6.05348507 #O  |
| 6.52677093  | 17.87393184 | 6.09482507 #O  |
| 14.09442365 | 17.88808262 | 6.06365507 #O  |
| 10.33686929 | 7.63110046  | 6.06830507 #O  |
| 2.68653282  | 7.62501829  | 6.03299507 #O  |
| 10.30240007 | 17.88980283 | 6.06203507 #O  |
| 2.74749354  | 17.89066294 | 6.05924507 #O  |
| 6.52045839  | 1.12110604  | 5.21324507 #O  |
| 14.08911021 | 1.06562924  | 5.22902507 #O  |
| 6.51387336  | 11.28351756 | 5.31764507 #O  |
| 14.09761777 | 11.32588799 | 5.19626507 #O  |
| 10.29764673 | 1.07291966  | 5.23553507 #O  |
| 2.74187735  | 1.06560876  | 5.23097507 #O  |
| 10.35769918 | 11.36076322 | 5.12837507 #O  |
| 2.70097447  | 11.37016294 | 5.12666507 #O  |
| 8.42212422  | 6.21282761  | 5.24387507 #O  |

|             |             |            |    |
|-------------|-------------|------------|----|
| 0.83011446  | 6.18423935  | 5.19371507 | #O |
| 8.41053457  | 16.40996692 | 5.30078507 | #O |
| 0.84725068  | 16.43490792 | 5.26238507 | #O |
| 4.61824758  | 6.21925792  | 5.18357507 | #O |
| 12.19711756 | 6.19253322  | 5.19263507 | #O |
| 4.64083348  | 16.40606777 | 5.31596507 | #O |
| 12.20336955 | 16.43707867 | 5.26388507 | #O |
| 6.53397662  | 3.99615169  | 4.25345507 | #O |
| 14.08496240 | 3.96770677  | 4.25966507 | #O |
| 6.50270151  | 14.17779271 | 4.44779507 | #O |
| 14.09620994 | 14.21383522 | 4.30316507 | #O |
| 10.30050782 | 3.97419852  | 4.26200507 | #O |
| 2.73330924  | 3.96676475  | 4.25030507 | #O |
| 10.36597967 | 14.24142003 | 4.29488507 | #O |
| 2.72483196  | 14.22929664 | 4.32032507 | #O |
| 8.39500450  | 19.33627485 | 4.28426507 | #O |
| 0.84968790  | 19.33514852 | 4.28168507 | #O |
| 8.43827496  | 9.10130729  | 4.28942507 | #O |
| 0.81141903  | 9.09342299  | 4.25420507 | #O |
| 4.65348885  | 19.33191289 | 4.28303507 | #O |
| 12.19875246 | 19.33527139 | 4.28183507 | #O |
| 4.64994656  | 9.09690437  | 4.34402507 | #O |
| 12.21983970 | 9.09524559  | 4.25150507 | #O |
| 8.41600544  | 1.10955605  | 3.15683507 | #O |
| 0.84628185  | 1.11029328  | 3.15707507 | #O |
| 8.40502434  | 11.35382094 | 3.14864507 | #O |
| 0.82302988  | 11.34311058 | 3.13223507 | #O |
| 4.62923777  | 1.10888025  | 3.15776507 | #O |
| 12.19570973 | 1.11082573  | 3.15935507 | #O |
| 4.63480856  | 11.35093344 | 3.18242507 | #O |
| 12.23113265 | 11.34612095 | 3.12806507 | #O |
| 6.52334975  | 16.44960754 | 3.23804507 | #O |
| 14.09312178 | 16.46745882 | 3.18350507 | #O |
| 6.54215114  | 6.23357254  | 3.12932507 | #O |
| 14.09018501 | 6.22306696  | 3.12980507 | #O |
| 10.30161289 | 16.47588785 | 3.19046507 | #O |
| 2.75282212  | 16.47123714 | 3.19838507 | #O |
| 10.29746508 | 6.22595446  | 3.13928507 | #O |
| 2.72346954  | 6.21692335  | 3.13055507 | #O |
| 8.41389521  | 14.28761998 | 2.31791507 | #O |
| 0.85391140  | 14.29652821 | 2.26922507 | #O |
| 8.41747534  | 4.06594310  | 2.22071507 | #O |
| 0.84481346  | 4.06514443  | 2.22167507 | #O |
| 4.63759395  | 14.29093753 | 2.31152507 | #O |
| 12.20536777 | 14.30365480 | 2.25314507 | #O |
| 4.63203830  | 4.06614788  | 2.22830507 | #O |
| 12.19950936 | 4.06584070  | 2.22812507 | #O |
| 6.52351626  | 19.42738458 | 2.24453507 | #O |
| 14.09238002 | 19.43035400 | 2.24648507 | #O |
| 6.52359195  | 9.17138540  | 2.24663507 | #O |
| 14.09057860 | 9.18373406  | 2.20136507 | #O |
| 10.30353542 | 19.42748698 | 2.24888507 | #O |
| 2.74339115  | 19.42806038 | 2.24729507 | #O |
| 10.31108928 | 9.18119470  | 2.23214507 | #O |
| 2.73570104  | 9.17355614  | 2.25701507 | #O |

|             |             |             |    |
|-------------|-------------|-------------|----|
| 6.52374333  | 12.81014321 | 1.66262507  | #O |
| 14.09757236 | 12.82798016 | 1.60796507  | #O |
| 6.52428830  | 2.57300491  | 1.61630507  | #O |
| 14.09129009 | 2.56827433  | 1.61858507  | #O |
| 10.30680522 | 12.82134506 | 1.63331507  | #O |
| 2.74899221  | 12.81456661 | 1.64477507  | #O |
| 10.30903051 | 2.57056795  | 1.61909507  | #O |
| 2.73789605  | 2.56749614  | 1.61651507  | #O |
| 8.41121427  | 17.91878019 | 1.67306507  | #O |
| 0.84908238  | 17.92652114 | 1.66265507  | #O |
| 8.41273412  | 7.69376528  | 1.60871507  | #O |
| 0.84504053  | 7.69306901  | 1.60193507  | #O |
| 4.63735174  | 17.91744908 | 1.67243507  | #O |
| 12.19993323 | 17.92863045 | 1.65527507  | #O |
| 4.63182637  | 7.68383311  | 1.64507507  | #O |
| 12.19757170 | 7.69069348  | 1.60544507  | #O |
| 6.52592321  | 15.74644884 | 0.80309507  | #O |
| 14.10246193 | 15.77417700 | 0.73952507  | #O |
| 6.51930790  | 5.53074355  | 0.68663507  | #O |
| 14.09138091 | 5.52859329  | 0.68735507  | #O |
| 10.29755591 | 15.76924778 | 0.74684507  | #O |
| 2.74716051  | 15.76570701 | 0.75677507  | #O |
| 10.31213380 | 5.53090738  | 0.69449507  | #O |
| 2.74230121  | 5.52910526  | 0.68792507  | #O |
| 8.41660491  | 10.64955845 | 0.72752507  | #O |
| 0.85572796  | 10.65406376 | 0.69677507  | #O |
| 8.41549529  | 0.40994222  | 0.71396507  | #O |
| 0.84799244  | 0.40932786  | 0.71306507  | #O |
| 4.63441497  | 10.64005633 | 0.75890507  | #O |
| 12.19531614 | 10.65842572 | 0.69128507  | #O |
| 4.63309796  | 0.41104807  | 0.71546507  | #O |
| 12.19866164 | 0.41147813  | 0.71483507  | #O |
| 8.41052549  | 12.91331490 | 29.60537507 | #O |
| 0.85603072  | 12.91304868 | 29.59253507 | #O |
| 8.41677445  | 2.66775986  | 29.58569507 | #O |
| 0.84523733  | 2.66743220  | 29.58542507 | #O |
| 4.63486911  | 12.90573778 | 29.61752507 | #O |
| 12.19745060 | 12.91472793 | 29.58821507 | #O |
| 4.63116030  | 2.66945959  | 29.58692507 | #O |
| 12.20058416 | 2.67011491  | 29.58710507 | #O |
| 6.51399446  | 7.78964655  | 29.58212507 | #O |
| 14.08633996 | 7.78835640  | 29.57291507 | #O |
| 6.52863291  | 18.01013567 | 29.64104507 | #O |
| 14.09502917 | 18.03016384 | 29.61866507 | #O |
| 10.30168858 | 7.78872501  | 29.57948507 | #O |
| 2.74295214  | 7.78725055  | 29.58446507 | #O |
| 10.30763781 | 18.02666198 | 29.62055507 | #O |
| 2.74143834  | 18.02346731 | 29.62574507 | #O |
| 8.41411471  | 5.57329829  | 28.62281507 | #O |
| 0.84485888  | 5.57446558  | 28.61897507 | #O |
| 8.41301418  | 15.80416806 | 28.68269507 | #O |
| 0.85126225  | 15.80924883 | 28.66838507 | #O |
| 4.63032771  | 5.57270441  | 28.61672507 | #O |
| 12.19876760 | 5.57649297  | 28.61765507 | #O |
| 4.63461176  | 15.79898695 | 28.69820507 | #O |

|             |             |             |     |
|-------------|-------------|-------------|-----|
| 12.19888871 | 15.81036696 | 28.66904507 | #O  |
| 6.52185108  | 10.68377835 | 28.65923507 | #O  |
| 14.09141119 | 10.69754004 | 28.62992507 | #O  |
| 6.52341030  | 0.45008047  | 28.64810507 | #O  |
| 14.09250113 | 0.45679749  | 28.63880507 | #O  |
| 10.30421663 | 10.69461159 | 28.63730507 | #O  |
| 2.73950068  | 10.68904138 | 28.64894507 | #O  |
| 10.30626026 | 0.45546637  | 28.64006507 | #O  |
| 2.74046951  | 0.45339802  | 28.64240507 | #O  |
| 6.52269881  | 4.12330394  | 27.80432507 | #O  |
| 14.09041208 | 4.12455314  | 27.80327507 | #O  |
| 6.52065518  | 14.36431271 | 27.83879507 | #O  |
| 14.09359106 | 14.37285233 | 27.82667507 | #O  |
| 10.30654788 | 4.12447122  | 27.80705507 | #O  |
| 2.73686667  | 4.12219809  | 27.80855507 | #O  |
| 10.30274824 | 14.37150073 | 27.82685507 | #O  |
| 2.74588892  | 14.36892042 | 27.82970507 | #O  |
| 8.41017429  | 9.25069941  | 27.81443507 | #O  |
| 0.84731123  | 9.25125233  | 27.81140507 | #O  |
| 8.41312468  | 19.47215102 | 27.84686507 | #O  |
| 0.84921862  | 19.47557097 | 27.83840507 | #O  |
| 4.63199289  | 9.24785287  | 27.82019507 | #O  |
| 12.19661801 | 9.25241962  | 27.80825507 | #O  |
| 4.63492966  | 19.47120900 | 27.85094507 | #O  |
| 12.20044792 | 19.47770075 | 27.83825507 | #O  |
| 6.52053408  | 7.13053960  | 27.16382507 | #O  |
| 14.08998822 | 7.13258747  | 27.15752507 | #O  |
| 6.51924735  | 17.34460864 | 27.23123507 | #O  |
| 14.09218323 | 17.35757780 | 27.20450507 | #O  |
| 10.30134041 | 7.13123587  | 27.16415507 | #O  |
| 2.73311244  | 7.13027337  | 27.16673507 | #O  |
| 10.30282393 | 17.35579820 | 27.20681507 | #O  |
| 2.75385150  | 17.35201783 | 27.21281507 | #O  |
| 8.41387553  | 1.99710291  | 27.17267507 | #O  |
| 0.84896127  | 1.99880264  | 27.17153507 | #O  |
| 8.40746458  | 12.24046673 | 27.19469507 | #O  |
| 0.85398709  | 12.25082896 | 27.17771507 | #O  |
| 4.63441497  | 1.99556701  | 27.17402507 | #O  |
| 12.19804098 | 1.99992897  | 27.17345507 | #O  |
| 4.63822974  | 12.23125132 | 27.21191507 | #O  |
| 12.19798043 | 12.25332736 | 27.17297507 | #O  |
| 4.91390786  | 7.49559290  | 7.93061507  | #O  |
| 6.38208193  | 6.05612460  | 8.83796507  | #O  |
| 6.52068546  | 3.02527700  | 5.73143507  | #Ti |
| 14.09003363 | 3.02931130  | 5.78054507  | #Ti |
| 6.51111824  | 13.18164731 | 6.04859507  | #Ti |
| 14.09923754 | 13.26784216 | 5.82641507  | #Ti |
| 10.30430745 | 3.04286820  | 5.78372507  | #Ti |
| 2.73759329  | 3.04200810  | 5.77658507  | #Ti |
| 10.34104738 | 13.26780120 | 5.79431507  | #Ti |
| 2.72570996  | 13.26575333 | 5.83409507  | #Ti |
| 8.46040520  | 8.20094077  | 5.92334507  | #Ti |
| 0.81154014  | 8.15297965  | 5.77148507  | #Ti |
| 8.39514528  | 18.38335998 | 5.80181507  | #Ti |
| 0.85379030  | 18.39167433 | 5.80166507  | #Ti |

|             |             |             |     |
|-------------|-------------|-------------|-----|
| 4.54142223  | 8.16127352  | 6.05594507  | #Ti |
| 12.21133214 | 8.15156662  | 5.76692507  | #Ti |
| 4.65413978  | 18.38135307 | 5.80301507  | #Ti |
| 12.19969102 | 18.39243204 | 5.80181507  | #Ti |
| 8.42326563  | 0.67594006  | 5.25869507  | #Ti |
| 0.84326939  | 0.67612437  | 5.25836507  | #Ti |
| 8.43974486  | 10.96843228 | 5.16422507  | #Ti |
| 0.84470750  | 10.92428021 | 5.23685507  | #Ti |
| 4.61585578  | 0.67387171  | 5.25758507  | #Ti |
| 12.19885843 | 0.67786506  | 5.25920507  | #Ti |
| 4.59552545  | 10.91819803 | 5.19638507  | #Ti |
| 12.21251291 | 10.92249856 | 5.23526507  | #Ti |
| 6.50255013  | 5.97298108  | 5.05910507  | #Ti |
| 14.08363026 | 5.78635868  | 5.23190507  | #Ti |
| 6.52515117  | 15.94775856 | 5.36114507  | #Ti |
| 14.09502917 | 16.03785870 | 5.28374507  | #Ti |
| 10.29172778 | 5.80779988  | 5.23256507  | #Ti |
| 2.73396017  | 5.80270069  | 5.21252507  | #Ti |
| 10.30794057 | 16.03854883 | 5.29562507  | #Ti |
| 2.74230121  | 16.03161884 | 5.30642507  | #Ti |
| 6.51685554  | 14.68404665 | 2.40272507  | #Ti |
| 14.09988847 | 14.70987030 | 2.28767507  | #Ti |
| 6.52543879  | 4.45139319  | 2.20946507  | #Ti |
| 14.09234975 | 4.47699156  | 2.23565507  | #Ti |
| 10.29850960 | 14.70460727 | 2.29361507  | #Ti |
| 2.76207144  | 14.70088015 | 2.30864507  | #Ti |
| 10.30978741 | 4.47656151  | 2.24093507  | #Ti |
| 2.73694236  | 4.47295726  | 2.23196507  | #Ti |
| 8.40444455  | 19.82393413 | 2.26412507  | #Ti |
| 0.85285174  | 19.82911524 | 2.26370507  | #Ti |
| 8.42277516  | 9.57420143  | 2.31557507  | #Ti |
| 0.83990875  | 9.60184768  | 2.24033507  | #Ti |
| 4.64239269  | 19.82225488 | 2.26508507  | #Ti |
| 12.19708728 | 19.82936099 | 2.26430507  | #Ti |
| 4.62558951  | 9.55359986  | 2.39978507  | #Ti |
| 12.20435352 | 9.60608677  | 2.23457507  | #Ti |
| 8.40734499  | 12.39757932 | 1.59131507  | #Ti |
| 0.85528896  | 12.41711600 | 1.60160507  | #Ti |
| 8.42714550  | 2.15048837  | 1.60667507  | #Ti |
| 0.84222486  | 2.15493225  | 1.60676507  | #Ti |
| 4.64068210  | 12.36149585 | 1.60145507  | #Ti |
| 12.20514070 | 12.42145748 | 1.59611507  | #Ti |
| 4.62116922  | 2.15022215  | 1.60877507  | #Ti |
| 12.20240072 | 2.15618145  | 1.60877507  | #Ti |
| 6.52478786  | 17.46727810 | 1.66970507  | #Ti |
| 14.09384841 | 17.51905849 | 1.63766507  | #Ti |
| 6.52141208  | 7.31920986  | 1.54211507  | #Ti |
| 14.09016987 | 7.28228676  | 1.58450507  | #Ti |
| 10.30495839 | 17.51347805 | 1.64576507  | #Ti |
| 2.74355766  | 17.50690848 | 1.65122507  | #Ti |
| 10.31214894 | 7.28542000  | 1.59116507  | #Ti |
| 2.73224958  | 7.28716069  | 1.58972507  | #Ti |
| 6.52127584  | 5.95502126  | 28.58651507 | #Ti |
| 14.09062401 | 5.96728800  | 28.58756507 | #Ti |
| 6.52230522  | 16.19546687 | 28.67681507 | #Ti |

|             |             |             |     |
|-------------|-------------|-------------|-----|
| 14.09474155 | 16.20133811 | 28.64213507 | #Ti |
| 10.30638136 | 5.96683747  | 28.59482507 | #Ti |
| 2.73651849  | 5.96321274  | 28.59590507 | #Ti |
| 10.30392900 | 16.20100840 | 28.64564507 | #Ti |
| 2.74694858  | 16.19862878 | 28.65290507 | #Ti |
| 8.41411471  | 11.08090130 | 28.63841507 | #Ti |
| 0.84800758  | 11.08751592 | 28.60991507 | #Ti |
| 8.41432513  | 0.84144891  | 28.61297507 | #Ti |
| 0.84912779  | 0.84271859  | 28.61069507 | #Ti |
| 4.63075157  | 11.07690796 | 28.66280507 | #Ti |
| 12.19885843 | 11.08966619 | 28.60463507 | #Ti |
| 4.63400624  | 0.84085503  | 28.61537507 | #Ti |
| 12.20002406 | 0.84415210  | 28.61213507 | #Ti |
| 8.41847445  | 3.60500852  | 28.06481507 | #Ti |
| 0.84396573  | 3.60664681  | 28.06526507 | #Ti |
| 8.41048462  | 13.85046117 | 28.08044507 | #Ti |
| 0.85248843  | 13.85855026 | 28.07639507 | #Ti |
| 4.62720928  | 3.60404602  | 28.06481507 | #Ti |
| 12.19950936 | 3.60824415  | 28.06643507 | #Ti |
| 4.63511132  | 13.84198299 | 28.09100507 | #Ti |
| 12.19838915 | 13.86080291 | 28.07273507 | #Ti |
| 6.51883862  | 8.73926435  | 28.05893507 | #Ti |
| 14.09039694 | 8.73789228  | 28.05917507 | #Ti |
| 6.52475758  | 18.95256545 | 28.12064507 | #Ti |
| 14.09365161 | 18.96628618 | 28.09775507 | #Ti |
| 10.30409552 | 8.73705265  | 28.06409507 | #Ti |
| 2.73931902  | 8.73510718  | 28.06793507 | #Ti |
| 10.30789516 | 18.96389017 | 28.10093507 | #Ti |
| 2.74186221  | 18.96069549 | 28.10555507 | #Ti |

Ana-Ser-Z

1.000000000

7.569000 0.000000 0.000000

0.000000 10.239350 0.000000

0.000000 0.000000 25.000000

H C N O Ti

7 3 1 51 24

Cartesian

4.02625000 5.70785000 6.23731000 #H

5.32188000 6.52921000 6.97280000 #H

4.61988000 5.29698000 7.87784000 #H

2.49634000 6.48626000 7.88043000 #H

4.82262000 8.23966000 8.87543000 #H

3.12341000 8.29617000 9.44431000 #H

4.53485000 6.88816000 10.77905000 #H

3.27827000 8.08625000 6.62861000 #C

3.43852000 7.02994000 7.74166000 #C

3.91560000 7.63414000 9.05426000 #C

4.43914000 6.05030000 7.20719000 #N

5.10494000 0.58906000 5.04760000 #O

1.32613000 0.57052000 5.07564000 #O

3.26900000 5.63489000 4.94949000 #O

6.94308000 5.63664000 5.03413000 #O

5.08645000 3.53882000 4.35437000 #O

|            |             |             |     |
|------------|-------------|-------------|-----|
| 1.31784000 | 3.54746000  | 4.36557000  | #O  |
| 3.20785000 | 8.72748000  | 3.87772000  | #O  |
| 6.99787000 | 8.61865000  | 4.43436000  | #O  |
| 3.19933000 | 2.06863000  | 3.54751000  | #O  |
| 6.99330000 | 2.09631000  | 3.57742000  | #O  |
| 5.10760000 | 7.18134000  | 3.54899000  | #O  |
| 1.32034000 | 7.15629000  | 3.59379000  | #O  |
| 3.17645000 | 4.95871000  | 2.50750000  | #O  |
| 7.00447000 | 4.98040000  | 2.58489000  | #O  |
| 5.18937000 | 10.11602000 | 2.65714000  | #O  |
| 1.22208000 | 10.10699000 | 2.68581000  | #O  |
| 5.09037000 | 2.11341000  | 1.49529000  | #O  |
| 1.31519000 | 2.10672000  | 1.49979000  | #O  |
| 3.20272000 | 7.18297000  | 1.41710000  | #O  |
| 6.99673000 | 7.21538000  | 1.47898000  | #O  |
| 5.09598000 | 5.04848000  | 0.52005000  | #O  |
| 1.30450000 | 5.05030000  | 0.49874000  | #O  |
| 3.20165000 | 10.14687000 | 0.63399000  | #O  |
| 6.98905000 | 10.16707000 | 0.57541000  | #O  |
| 3.20113000 | 3.53458000  | 24.92299000 | #O  |
| 6.98553000 | 3.53876000  | 24.95833000 | #O  |
| 5.09100000 | 8.68359000  | 24.96452000 | #O  |
| 1.31413000 | 8.68172000  | 24.96201000 | #O  |
| 3.20369000 | 6.52248000  | 23.98110000 | #O  |
| 6.97858000 | 6.52535000  | 24.02899000 | #O  |
| 5.08755000 | 1.37613000  | 24.06817000 | #O  |
| 1.31507000 | 1.37249000  | 24.07398000 | #O  |
| 5.10144000 | 3.64137000  | 22.91032000 | #O  |
| 1.29711000 | 3.63665000  | 22.91219000 | #O  |
| 3.20210000 | 8.77869000  | 22.91000000 | #O  |
| 6.98309000 | 8.76673000  | 22.91330000 | #O  |
| 5.09428000 | 6.54523000  | 21.93474000 | #O  |
| 1.30608000 | 6.54358000  | 21.94275000 | #O  |
| 3.20074000 | 1.42551000  | 21.98042000 | #O  |
| 6.98545000 | 1.42199000  | 21.98616000 | #O  |
| 3.19884000 | 5.09491000  | 21.12785000 | #O  |
| 6.98507000 | 5.09435000  | 21.12865000 | #O  |
| 5.09279000 | 10.22636000 | 21.13325000 | #O  |
| 1.30863000 | 10.22532000 | 21.13398000 | #O  |
| 3.20038000 | 8.10823000  | 20.48848000 | #O  |
| 6.98859000 | 8.10363000  | 20.49651000 | #O  |
| 5.09405000 | 2.96183000  | 20.50558000 | #O  |
| 1.31083000 | 2.96145000  | 20.50702000 | #O  |
| 2.11474000 | 8.41247000  | 6.27486000  | #O  |
| 4.40834000 | 8.46427000  | 6.17172000  | #O  |
| 4.18065000 | 6.54034000  | 9.94304000  | #O  |
| 3.19031000 | 4.02428000  | 4.02317000  | #Ti |
| 6.98998000 | 4.03578000  | 4.09360000  | #Ti |
| 5.09022000 | 9.15693000  | 4.26394000  | #Ti |
| 1.34904000 | 9.14126000  | 4.29324000  | #Ti |
| 5.10396000 | 1.67189000  | 3.57387000  | #Ti |
| 1.30351000 | 1.65203000  | 3.59339000  | #Ti |
| 3.21833000 | 6.84963000  | 3.37499000  | #Ti |
| 6.99885000 | 6.82022000  | 3.58630000  | #Ti |
| 3.19929000 | 5.41807000  | 0.49519000  | #Ti |

|            |            |             |     |
|------------|------------|-------------|-----|
| 6.98546000 | 5.44763000 | 0.57271000  | #Ti |
| 5.09866000 | 0.32119000 | 0.67954000  | #Ti |
| 1.30581000 | 0.32432000 | 0.68537000  | #Ti |
| 5.10140000 | 3.10936000 | 24.92475000 | #Ti |
| 1.30120000 | 3.10719000 | 24.92847000 | #Ti |
| 3.20208000 | 8.29034000 | 24.88411000 | #Ti |
| 6.98892000 | 8.26569000 | 24.93537000 | #Ti |
| 3.20053000 | 6.92870000 | 21.91661000 | #Ti |
| 6.98493000 | 6.94131000 | 21.93348000 | #Ti |
| 5.09389000 | 1.81392000 | 21.96160000 | #Ti |
| 1.30866000 | 1.81358000 | 21.96110000 | #Ti |
| 5.09706000 | 4.57484000 | 21.38771000 | #Ti |
| 1.30250000 | 4.57421000 | 21.39144000 | #Ti |
| 3.20098000 | 9.71300000 | 21.38637000 | #Ti |
| 6.98537000 | 9.70909000 | 21.39838000 | #Ti |

Ana-Gln-D

1.000000000

|          |           |           |
|----------|-----------|-----------|
| 7.569000 | 0.000000  | 0.000000  |
| 0.000000 | 20.478700 | 0.000000  |
| 0.000000 | 0.000000  | 25.000000 |

H C N O Ti

10 5 2 99 48

Cartesian

|            |             |             |    |
|------------|-------------|-------------|----|
| 6.85240747 | 6.72544487  | 8.34886321  | #H |
| 6.31734747 | 5.15400487  | 8.30967321  | #H |
| 4.98458747 | 6.21370487  | 9.92184321  | #H |
| 4.10390747 | 3.38845487  | 7.33105321  | #H |
| 4.24615747 | 8.15994487  | 7.65481321  | #H |
| 3.38049747 | 7.98848487  | 9.15924321  | #H |
| 5.22265747 | 9.01869487  | 10.42420321 | #H |
| 6.35055747 | 8.79684487  | 9.07837321  | #H |
| 5.43432747 | 12.36134487 | 8.99502321  | #H |
| 6.06881747 | 11.33174487 | 10.26006321 | #H |
| 3.77895747 | 5.41362487  | 8.36390321  | #C |
| 4.83985747 | 6.47178487  | 8.85476321  | #C |
| 4.38251747 | 7.91857487  | 8.71195321  | #C |
| 5.29228747 | 8.99021487  | 9.32441321  | #C |
| 5.01459747 | 10.38042487 | 8.75690321  | #C |
| 6.06660747 | 6.12393487  | 8.09170321  | #N |
| 5.53036747 | 11.43740487 | 9.40997321  | #N |
| 6.33188747 | 8.22502487  | 6.41190321  | #O |
| 6.25073747 | 18.37267487 | 6.42663321  | #O |
| 2.34513747 | 8.22577487  | 6.44655321  | #O |
| 2.47275747 | 18.37243487 | 6.42517321  | #O |
| 4.30081747 | 3.01212487  | 6.39711321  | #O |
| 4.39281747 | 13.25892487 | 6.56943321  | #O |
| 0.56821747 | 3.01299487  | 6.39132321  | #O |
| 0.56698747 | 13.23300487 | 6.47835321  | #O |
| 6.24523747 | 0.89283487  | 5.75899321  | #O |
| 6.27604747 | 11.11612487 | 5.80192321  | #O |
| 2.46942747 | 0.88815487  | 5.74700321  | #O |
| 2.43867747 | 11.12465487 | 5.80219321  | #O |
| 4.36091747 | 6.03738487  | 5.62176321  | #O |



|            |             |             |    |
|------------|-------------|-------------|----|
| 4.36772747 | 16.24919487 | 5.82873321  | #O |
| 0.55593747 | 5.99170487  | 5.80629321  | #O |
| 0.58125747 | 16.25172487 | 5.80971321  | #O |
| 4.35913747 | 19.94005487 | 4.94354321  | #O |
| 4.35241747 | 9.68752487  | 4.94525321  | #O |
| 0.57339747 | 19.90820487 | 4.96363321  | #O |
| 0.57312747 | 9.71967487  | 4.87243321  | #O |
| 6.24114747 | 4.55917487  | 4.96241321  | #O |
| 6.25502747 | 14.78782487 | 5.03540321  | #O |
| 2.45565747 | 4.56781487  | 4.91801321  | #O |
| 2.48047747 | 14.78036487 | 5.05339321  | #O |
| 4.38192747 | 2.33834487  | 3.96729321  | #O |
| 4.35583747 | 12.55798487 | 4.16908321  | #O |
| 0.57038747 | 2.32923487  | 3.97817321  | #O |
| 0.57680747 | 12.59978487 | 4.05166321  | #O |
| 6.24807747 | 17.69043487 | 4.02062321  | #O |
| 6.25831747 | 7.44841487  | 4.04315321  | #O |
| 2.48203747 | 17.68488487 | 4.01965321  | #O |
| 2.46236747 | 7.44353487  | 4.08933321  | #O |
| 6.25901747 | 19.92992487 | 2.88034321  | #O |
| 6.24722747 | 9.68722487  | 2.88721321  | #O |
| 2.46929747 | 19.92858487 | 2.88300321  | #O |
| 2.47211747 | 9.68365487  | 2.90105321  | #O |
| 4.36442747 | 14.80487487 | 2.97240321  | #O |
| 4.36780747 | 4.56996487  | 2.84960321  | #O |
| 0.58756747 | 14.82028487 | 2.94235321  | #O |
| 0.55813747 | 4.56314487  | 2.86013321  | #O |
| 6.25309747 | 12.62641487 | 2.04598321  | #O |
| 6.25909747 | 2.40383487  | 1.92526321  | #O |
| 2.47359747 | 12.62864487 | 2.04410321  | #O |
| 2.47389747 | 2.40293487  | 1.94208321  | #O |
| 4.36750747 | 17.77003487 | 1.97360321  | #O |
| 4.36263747 | 7.50355487  | 1.98892321  | #O |
| 0.58296747 | 17.76583487 | 1.97618321  | #O |
| 0.58089747 | 7.50501487  | 1.99536321  | #O |
| 4.36238747 | 11.15081487 | 1.41069321  | #O |
| 4.36663747 | 0.90705487  | 1.34072321  | #O |
| 0.58078747 | 11.15756487 | 1.38992321  | #O |
| 0.58294747 | 0.90475487  | 1.34773321  | #O |
| 6.25616747 | 16.25580487 | 1.41656321  | #O |
| 6.25245747 | 6.03494487  | 1.33867321  | #O |
| 2.47864747 | 16.25754487 | 1.41138321  | #O |
| 2.47336747 | 6.02510487  | 1.36132321  | #O |
| 4.36394747 | 14.08753487 | 0.54153321  | #O |
| 4.36208747 | 3.86998487  | 0.40633321  | #O |
| 0.57756747 | 14.10217487 | 0.50178321  | #O |
| 0.58818747 | 3.86993487  | 0.41607321  | #O |
| 6.26092747 | 8.97811487  | 0.47094321  | #O |
| 6.26378747 | 19.22036487 | 0.43855321  | #O |
| 2.47716747 | 8.97429487  | 0.48831321  | #O |
| 2.47646747 | 19.22208487 | 0.44030321  | #O |
| 6.24993747 | 11.23380487 | 24.35293321 | #O |
| 6.26497747 | 0.99273487  | 24.30544321 | #O |
| 2.47300747 | 11.23229487 | 24.35749321 | #O |
| 2.47548747 | 0.99486487  | 24.30790321 | #O |

|            |             |             |     |
|------------|-------------|-------------|-----|
| 4.36393747 | 6.12133487  | 24.30403321 | #O  |
| 4.37184747 | 16.34121487 | 24.37529321 | #O  |
| 0.58789747 | 6.11749487  | 24.30856321 | #O  |
| 0.58420747 | 16.35165487 | 24.36325321 | #O  |
| 6.26173747 | 3.89781487  | 23.33969321 | #O  |
| 6.25781747 | 14.12109487 | 23.43695321 | #O  |
| 2.47733747 | 3.89726487  | 23.33500321 | #O  |
| 2.47348747 | 14.12076487 | 23.43912321 | #O  |
| 4.36822747 | 9.00669487  | 23.39908321 | #O  |
| 4.36972747 | 19.24985487 | 23.36753321 | #O  |
| 0.58384747 | 9.00648487  | 23.40301321 | #O  |
| 0.58466747 | 19.25276487 | 23.35807321 | #O  |
| 4.37043747 | 2.44920487  | 22.52564321 | #O  |
| 4.36588747 | 12.68658487 | 22.58509321 | #O  |
| 0.58507747 | 2.44759487  | 22.52817321 | #O  |
| 0.58194747 | 12.68909487 | 22.57888321 | #O  |
| 6.25850747 | 7.58074487  | 22.53790321 | #O  |
| 6.26031747 | 17.78865487 | 22.57777321 | #O  |
| 2.47644747 | 7.58106487  | 22.53965321 | #O  |
| 2.47978747 | 17.78908487 | 22.58131321 | #O  |
| 4.36967747 | 5.45889487  | 21.88523321 | #O  |
| 4.36684747 | 15.65748487 | 21.97110321 | #O  |
| 0.58352747 | 5.45810487  | 21.89038321 | #O  |
| 0.58485747 | 15.66439487 | 21.95498321 | #O  |
| 6.25642747 | 0.31868487  | 21.89408321 | #O  |
| 6.26631747 | 10.56307487 | 21.94301321 | #O  |
| 2.48058747 | 0.31749487  | 21.89712321 | #O  |
| 2.47798747 | 10.56018487 | 21.95011321 | #O  |
| 2.73998747 | 5.81559487  | 7.74282321  | #O  |
| 4.11391747 | 4.22896487  | 8.60711321  | #O  |
| 4.36059747 | 10.53366487 | 7.70352321  | #O  |
| 4.36387747 | 1.36069487  | 5.44414321  | #Ti |
| 4.34146747 | 11.57653487 | 5.77302321  | #Ti |
| 0.57688747 | 1.40965487  | 5.50241321  | #Ti |
| 0.57536747 | 11.62144487 | 5.54908321  | #Ti |
| 6.25400747 | 6.54646487  | 5.64463321  | #Ti |
| 6.24687747 | 16.74341487 | 5.54178321  | #Ti |
| 2.42255747 | 6.53865487  | 5.74899321  | #Ti |
| 2.48721747 | 16.74219487 | 5.54384321  | #Ti |
| 6.26520747 | 19.50487487 | 4.98435321  | #Ti |
| 6.24822747 | 9.31462487  | 4.92132321  | #Ti |
| 2.45193747 | 19.50517487 | 4.98188321  | #Ti |
| 2.45743747 | 9.28490487  | 4.93486321  | #Ti |
| 4.32708747 | 4.29078487  | 4.77154321  | #Ti |
| 4.37164747 | 14.33681487 | 5.08031321  | #Ti |
| 0.55523747 | 4.17752487  | 4.94143321  | #Ti |
| 0.58322747 | 14.39209487 | 5.05265321  | #Ti |
| 4.35919747 | 13.02724487 | 2.14462321  | #Ti |
| 4.36822747 | 2.78647487  | 1.92359321  | #Ti |
| 0.58370747 | 13.04094487 | 2.05336321  | #Ti |
| 0.58167747 | 2.81331487  | 1.95859321  | #Ti |
| 6.25352747 | 18.15920487 | 1.99368321  | #Ti |
| 6.26013747 | 7.92292487  | 2.04270321  | #Ti |
| 2.48287747 | 18.15777487 | 1.99453321  | #Ti |
| 2.46817747 | 7.91398487  | 2.09056321  | #Ti |

|            |             |             |     |
|------------|-------------|-------------|-----|
| 6.25150747 | 10.74714487 | 1.34220321  | #Ti |
| 6.26784747 | 0.48095487  | 1.32623321  | #Ti |
| 2.47587747 | 10.72675487 | 1.34355321  | #Ti |
| 2.46549747 | 0.48182487  | 1.32962321  | #Ti |
| 4.36734747 | 15.81214487 | 1.40203321  | #Ti |
| 4.35965747 | 5.65751487  | 1.26488321  | #Ti |
| 0.58269747 | 15.84632487 | 1.39487321  | #Ti |
| 0.57731747 | 5.62742487  | 1.31595321  | #Ti |
| 4.37003747 | 4.28185487  | 23.30814321 | #Ti |
| 4.36590747 | 14.51771487 | 23.42551321 | #Ti |
| 0.58614747 | 4.29074487  | 23.32077321 | #Ti |
| 0.58223747 | 14.52106487 | 23.40331321 | #Ti |
| 6.26143747 | 9.40333487  | 23.38251321 | #Ti |
| 6.26015747 | 19.64137487 | 23.33603321 | #Ti |
| 2.47586747 | 9.40322487  | 23.39430321 | #Ti |
| 2.47839747 | 19.64091487 | 23.33987321 | #Ti |
| 6.26525747 | 1.92710487  | 22.78390321 | #Ti |
| 6.25612747 | 12.17583487 | 22.83150321 | #Ti |
| 2.47514747 | 1.92657487  | 22.78508321 | #Ti |
| 2.47392747 | 12.17324487 | 22.83445321 | #Ti |
| 4.36620747 | 7.06829487  | 22.78090321 | #Ti |
| 4.37057747 | 17.27210487 | 22.84921321 | #Ti |
| 0.58411747 | 7.06355487  | 22.79247321 | #Ti |
| 0.58552747 | 17.27910487 | 22.83900321 | #Ti |

#### Ana-Lys-D

1.000000000

7.569000 0.000000 0.000000

0.000000 20.478700 0.000000

0.000000 0.000000 30.000000

H C N O Ti

14 6 2 98 48

Cartesian

2.23559000 19.22925000 5.80079000 #H

1.47051000 17.84544000 5.41781000 #H

0.48884000 18.80716000 7.35380000 #H

6.79903000 16.38244000 4.76388000 #H

7.38444000 0.66556000 5.49034000 #H

6.68545000 0.41166000 7.08108000 #H

1.07765000 1.05160000 8.21589000 #H

2.13639000 0.35590000 7.01616000 #H

1.02840000 2.49557000 5.58381000 #H

1.20290000 3.17133000 7.21032000 #H

3.59330000 2.50846000 7.24745000 #H

3.41657000 1.68031000 5.68500000 #H

4.37088000 4.01942000 5.71955000 #H

2.84955000 4.56321000 5.89612000 #H

6.58395000 18.40969000 5.89421000 #C

0.23950000 19.21871000 6.35792000 #C

0.02682000 0.25270000 6.48334000 #C

1.23218000 0.97738000 7.12875000 #C

1.55535000 2.37123000 6.53791000 #C

3.05590000 2.52800000 6.28324000 #C

1.35914000 18.86621000 5.41303000 #N

|            |             |             |    |
|------------|-------------|-------------|----|
| 3.39421000 | 3.77343000  | 5.53695000  | #N |
| 1.56645000 | 0.79330000  | 3.92103000  | #O |
| 1.52217000 | 10.99538000 | 3.86784000  | #O |
| 5.23442000 | 0.83106000  | 3.98612000  | #O |
| 5.33222000 | 10.99754000 | 3.87025000  | #O |
| 7.16386000 | 16.09114000 | 3.87204000  | #O |
| 7.20975000 | 5.85971000  | 3.93470000  | #O |
| 3.40377000 | 16.09730000 | 3.85999000  | #O |
| 3.41948000 | 5.94402000  | 3.99264000  | #O |
| 1.53037000 | 13.98066000 | 3.21298000  | #O |
| 1.48716000 | 3.74653000  | 3.27879000  | #O |
| 5.32958000 | 13.97876000 | 3.21218000  | #O |
| 5.31802000 | 3.74703000  | 3.32477000  | #O |
| 7.20303000 | 19.11742000 | 3.07955000  | #O |
| 7.21119000 | 8.86782000  | 3.26810000  | #O |
| 3.41105000 | 19.07099000 | 3.28834000  | #O |
| 3.42541000 | 8.88788000  | 3.26174000  | #O |
| 7.21334000 | 12.55700000 | 2.36557000  | #O |
| 7.18945000 | 2.28168000  | 2.48193000  | #O |
| 3.42803000 | 12.52478000 | 2.40928000  | #O |
| 3.40637000 | 2.34278000  | 2.47886000  | #O |
| 1.52125000 | 17.63865000 | 2.42210000  | #O |
| 1.53010000 | 7.41547000  | 2.46394000  | #O |
| 5.30620000 | 17.64360000 | 2.40840000  | #O |
| 5.32011000 | 7.41708000  | 2.46901000  | #O |
| 7.23642000 | 15.43003000 | 1.42795000  | #O |
| 7.18179000 | 5.19978000  | 1.51339000  | #O |
| 3.43506000 | 15.41809000 | 1.44244000  | #O |
| 3.41792000 | 5.19587000  | 1.60958000  | #O |
| 1.53731000 | 10.30775000 | 1.46231000  | #O |
| 1.54926000 | 0.06705000  | 1.54435000  | #O |
| 5.32022000 | 10.30674000 | 1.46345000  | #O |
| 5.28740000 | 0.06920000  | 1.61547000  | #O |
| 1.54674000 | 12.54871000 | 0.32427000  | #O |
| 1.52085000 | 2.30885000  | 0.41070000  | #O |
| 5.31844000 | 12.54717000 | 0.32516000  | #O |
| 5.30775000 | 2.30756000  | 0.42995000  | #O |
| 7.21365000 | 7.43425000  | 0.38883000  | #O |
| 7.20235000 | 17.66247000 | 0.31968000  | #O |
| 3.43115000 | 7.43830000  | 0.40343000  | #O |
| 3.41032000 | 17.65495000 | 0.33592000  | #O |
| 1.52926000 | 5.25542000  | 29.49850000 | #O |
| 1.54347000 | 15.49765000 | 29.39195000 | #O |
| 5.30856000 | 5.25719000  | 29.49246000 | #O |
| 5.32756000 | 15.49676000 | 29.40057000 | #O |
| 7.21639000 | 10.38457000 | 29.41467000 | #O |
| 7.20132000 | 0.11439000  | 29.51511000 | #O |
| 3.43169000 | 10.38845000 | 29.41355000 | #O |
| 3.42249000 | 0.11913000  | 29.50542000 | #O |
| 7.20208000 | 3.76299000  | 28.89205000 | #O |
| 7.21985000 | 14.00691000 | 28.79019000 | #O |
| 3.42027000 | 3.75515000  | 28.91243000 | #O |
| 3.43606000 | 14.00580000 | 28.79446000 | #O |
| 1.54050000 | 8.87578000  | 28.85336000 | #O |
| 1.52424000 | 19.13843000 | 28.83079000 | #O |

|            |             |             |     |
|------------|-------------|-------------|-----|
| 5.32226000 | 8.87531000  | 28.85283000 | #O  |
| 5.31469000 | 19.13115000 | 28.85329000 | #O  |
| 7.20674000 | 6.71536000  | 27.94926000 | #O  |
| 7.21705000 | 16.97424000 | 27.87849000 | #O  |
| 3.42077000 | 6.70477000  | 27.98025000 | #O  |
| 3.43568000 | 16.97239000 | 27.89126000 | #O  |
| 1.52624000 | 1.59467000  | 27.98815000 | #O  |
| 1.54234000 | 11.84090000 | 27.88159000 | #O  |
| 5.31682000 | 1.58704000  | 28.01079000 | #O  |
| 5.32810000 | 11.84124000 | 27.88270000 | #O  |
| 1.52937000 | 3.84908000  | 26.85430000 | #O  |
| 1.54537000 | 14.09273000 | 26.75433000 | #O  |
| 5.31084000 | 3.84278000  | 26.85794000 | #O  |
| 5.32765000 | 14.09394000 | 26.75540000 | #O  |
| 7.20009000 | 19.22442000 | 26.78983000 | #O  |
| 7.21810000 | 8.96732000  | 26.80707000 | #O  |
| 3.42865000 | 19.21815000 | 26.79539000 | #O  |
| 3.43474000 | 8.96365000  | 26.81165000 | #O  |
| 1.54032000 | 16.99540000 | 25.81951000 | #O  |
| 1.53238000 | 6.74066000  | 25.88075000 | #O  |
| 5.32526000 | 16.99504000 | 25.81699000 | #O  |
| 5.31754000 | 6.73977000  | 25.88214000 | #O  |
| 7.20627000 | 1.62158000  | 25.91577000 | #O  |
| 7.22045000 | 11.87263000 | 25.79661000 | #O  |
| 3.42332000 | 1.62044000  | 25.92118000 | #O  |
| 3.43631000 | 11.87207000 | 25.79986000 | #O  |
| 7.21911000 | 15.55826000 | 24.98051000 | #O  |
| 7.20776000 | 5.28870000  | 25.06650000 | #O  |
| 3.43392000 | 15.55750000 | 24.98457000 | #O  |
| 3.42469000 | 5.28675000  | 25.07562000 | #O  |
| 1.53013000 | 0.20356000  | 25.03264000 | #O  |
| 1.54499000 | 10.40820000 | 25.02136000 | #O  |
| 5.31653000 | 0.20419000  | 25.02976000 | #O  |
| 5.32726000 | 10.40876000 | 25.01950000 | #O  |
| 7.21601000 | 18.56504000 | 24.36998000 | #O  |
| 7.21421000 | 8.28022000  | 24.40005000 | #O  |
| 3.42822000 | 18.56241000 | 24.37564000 | #O  |
| 3.42787000 | 8.27192000  | 24.41088000 | #O  |
| 1.54375000 | 13.42459000 | 24.34246000 | #O  |
| 1.53044000 | 3.16338000  | 24.44776000 | #O  |
| 5.32587000 | 13.42545000 | 24.34315000 | #O  |
| 5.31402000 | 3.16197000  | 24.45201000 | #O  |
| 5.61849000 | 18.94684000 | 5.24220000  | #O  |
| 6.60068000 | 17.17618000 | 6.16092000  | #O  |
| 7.22404000 | 14.43678000 | 2.89344000  | #Ti |
| 7.18007000 | 4.24461000  | 3.02516000  | #Ti |
| 3.43556000 | 14.49797000 | 2.96513000  | #Ti |
| 3.38812000 | 4.22355000  | 3.23835000  | #Ti |
| 1.52951000 | 19.60314000 | 3.15925000  | #Ti |
| 1.54121000 | 9.36224000  | 2.98721000  | #Ti |
| 5.28258000 | 19.62496000 | 3.27058000  | #Ti |
| 5.31175000 | 9.36435000  | 2.98910000  | #Ti |
| 1.55213000 | 12.11857000 | 2.42250000  | #Ti |
| 1.52500000 | 1.89692000  | 2.43546000  | #Ti |
| 5.30569000 | 12.12177000 | 2.42492000  | #Ti |

|            |             |             |     |
|------------|-------------|-------------|-----|
| 5.29016000 | 1.89746000  | 2.47105000  | #Ti |
| 7.16087000 | 17.37976000 | 2.22864000  | #Ti |
| 7.21037000 | 7.01327000  | 2.49630000  | #Ti |
| 3.39607000 | 17.26794000 | 2.40775000  | #Ti |
| 3.42707000 | 6.97986000  | 2.50031000  | #Ti |
| 7.20117000 | 5.66157000  | 29.50752000 | #Ti |
| 7.22167000 | 15.88095000 | 29.38477000 | #Ti |
| 3.42193000 | 5.64856000  | 29.59943000 | #Ti |
| 3.43574000 | 15.90738000 | 29.42446000 | #Ti |
| 1.54609000 | 10.77782000 | 29.43465000 | #Ti |
| 1.53136000 | 0.53103000  | 29.57183000 | #Ti |
| 5.31704000 | 10.77718000 | 29.43554000 | #Ti |
| 5.30750000 | 0.53305000  | 29.61513000 | #Ti |
| 1.52962000 | 3.34918000  | 28.84927000 | #Ti |
| 1.55163000 | 13.58050000 | 28.77160000 | #Ti |
| 5.30712000 | 3.33616000  | 28.85505000 | #Ti |
| 5.31848000 | 13.58018000 | 28.77329000 | #Ti |
| 7.21595000 | 8.46338000  | 28.83546000 | #Ti |
| 7.19791000 | 18.76445000 | 28.74195000 | #Ti |
| 3.43122000 | 8.43214000  | 28.83121000 | #Ti |
| 3.42008000 | 18.73006000 | 28.79689000 | #Ti |
| 7.21714000 | 17.38155000 | 25.78504000 | #Ti |
| 7.20942000 | 7.13717000  | 25.84918000 | #Ti |
| 3.43228000 | 17.39052000 | 25.79871000 | #Ti |
| 3.42443000 | 7.13393000  | 25.87090000 | #Ti |
| 1.53023000 | 2.01665000  | 25.89712000 | #Ti |
| 1.54487000 | 12.26242000 | 25.77829000 | #Ti |
| 5.31345000 | 2.01792000  | 25.90164000 | #Ti |
| 5.32698000 | 12.26330000 | 25.77875000 | #Ti |
| 1.54510000 | 15.03195000 | 25.23555000 | #Ti |
| 1.53142000 | 4.77907000  | 25.32542000 | #Ti |
| 5.32357000 | 15.03285000 | 25.23649000 | #Ti |
| 5.31447000 | 4.77833000  | 25.33009000 | #Ti |
| 7.20522000 | 20.17310000 | 25.26692000 | #Ti |
| 7.22011000 | 9.89611000  | 25.28082000 | #Ti |
| 3.42370000 | 20.16684000 | 25.28045000 | #Ti |
| 3.43624000 | 9.88914000  | 25.28181000 | #Ti |

*Glycine adsorbed on the 9-layer (110) rutile surface*

Gly-D1-9layer

1.000000000

8.876100 0.000000 0.000000

0.000000 12.992946 0.000000

0.000000 0.000000 50.000000

H C N O Ti

5 2 1 218 108

Cartesian

5.40304000 5.11734000 32.36588000 #H

3.60839000 5.24393000 32.38221000 #H

5.59732000 7.27160000 30.20615000 #H

3.81579000 7.27318000 31.09599000 #H

4.91182000 7.43022000 32.33831000 #H

4.47571000 4.74186000 30.46723000 #C

4.52220000 5.46029000 31.80964000 #C

|            |             |             |    |
|------------|-------------|-------------|----|
| 4.68543000 | 6.89950000  | 31.49742000 | #N |
| 5.60060000 | 4.50959000  | 29.91209000 | #O |
| 3.33241000 | 4.53535000  | 29.94421000 | #O |
| 2.97150000 | 1.13194000  | 29.24875000 | #O |
| 4.44172000 | 12.06052000 | 28.09908000 | #O |
| 4.44056000 | 3.08028000  | 27.88881000 | #O |
| 2.94449000 | 1.04816000  | 26.66518000 | #O |
| 2.92798000 | 4.32910000  | 25.92511000 | #O |
| 4.44061000 | 2.36327000  | 24.67695000 | #O |
| 4.44175000 | 12.78578000 | 24.64875000 | #O |
| 2.98811000 | 4.34313000  | 23.35530000 | #O |
| 2.96099000 | 1.07374000  | 22.63431000 | #O |
| 4.44034000 | 12.08822000 | 21.34033000 | #O |
| 4.44172000 | 3.06580000  | 21.35655000 | #O |
| 2.96153000 | 1.08300000  | 20.05621000 | #O |
| 2.95980000 | 4.32765000  | 19.36555000 | #O |
| 4.44103000 | 2.36278000  | 18.07501000 | #O |
| 4.44053000 | 12.78809000 | 18.06774000 | #O |
| 2.96046000 | 4.33276000  | 16.80670000 | #O |
| 2.96033000 | 1.07897000  | 16.08165000 | #O |
| 4.43880000 | 12.08680000 | 14.79318000 | #O |
| 4.43897000 | 3.06883000  | 14.80937000 | #O |
| 2.95830000 | 1.08387000  | 13.51105000 | #O |
| 2.95771000 | 10.82329000 | 12.80729000 | #O |
| 4.43886000 | 2.36695000  | 11.52677000 | #O |
| 4.43873000 | 12.79056000 | 11.52421000 | #O |
| 2.96000000 | 4.33332000  | 10.26628000 | #O |
| 2.95806000 | 1.08165000  | 9.53481000  | #O |
| 4.43851000 | 12.08632000 | 8.23981000  | #O |
| 4.43887000 | 3.07221000  | 8.24754000  | #O |
| 2.95979000 | 1.08410000  | 6.95394000  | #O |
| 2.95858000 | 10.82165000 | 6.24682000  | #O |
| 4.43878000 | 2.37346000  | 4.93131000  | #O |
| 4.43851000 | 12.78351000 | 4.93276000  | #O |
| 2.95948000 | 10.82845000 | 3.66650000  | #O |
| 2.95931000 | 1.08046000  | 2.91932000  | #O |
| 4.43844000 | 12.04983000 | 1.50613000  | #O |
| 4.43876000 | 3.10713000  | 1.51541000  | #O |
| 2.95896000 | 1.08279000  | 0.33389000  | #O |
| 0.00363000 | 1.09354000  | 29.26141000 | #O |
| 1.48311000 | 12.06960000 | 28.09288000 | #O |
| 1.46826000 | 3.11914000  | 28.05396000 | #O |
| 0.00531000 | 1.08489000  | 26.67299000 | #O |
| 0.00458000 | 4.33042000  | 25.88459000 | #O |
| 1.48251000 | 2.36467000  | 24.64215000 | #O |
| 1.47544000 | 12.78480000 | 24.64886000 | #O |
| 0.00472000 | 4.34191000  | 23.33784000 | #O |
| 0.00196000 | 1.07594000  | 22.63171000 | #O |
| 1.48094000 | 12.08867000 | 21.34082000 | #O |
| 1.48284000 | 3.06821000  | 21.36340000 | #O |
| 0.00132000 | 1.08447000  | 20.05700000 | #O |
| 0.00155000 | 4.32924000  | 19.36129000 | #O |
| 1.48022000 | 2.36245000  | 18.07299000 | #O |
| 1.48097000 | 12.78808000 | 18.07084000 | #O |
| 0.00133000 | 4.33466000  | 16.80425000 | #O |

|            |             |             |    |
|------------|-------------|-------------|----|
| 0.00041000 | 1.07710000  | 16.08337000 | #O |
| 1.48023000 | 12.08740000 | 14.79334000 | #O |
| 1.48018000 | 3.06892000  | 14.80918000 | #O |
| 0.00046000 | 1.08483000  | 13.51077000 | #O |
| 0.00044000 | 10.82452000 | 12.80779000 | #O |
| 1.47950000 | 2.36688000  | 11.52778000 | #O |
| 1.47955000 | 12.79048000 | 11.52483000 | #O |
| 0.00059000 | 4.33221000  | 10.26717000 | #O |
| 0.00005000 | 1.08026000  | 9.53497000  | #O |
| 1.48065000 | 12.08635000 | 8.23977000  | #O |
| 1.48000000 | 3.07231000  | 8.24873000  | #O |
| 0.00059000 | 1.08347000  | 6.95562000  | #O |
| 0.00052000 | 10.82415000 | 6.24630000  | #O |
| 1.47999000 | 2.37295000  | 4.93292000  | #O |
| 1.48027000 | 12.78328000 | 4.93132000  | #O |
| 0.00025000 | 10.82798000 | 3.66678000  | #O |
| 0.00043000 | 1.08021000  | 2.91960000  | #O |
| 1.47999000 | 12.05055000 | 1.50889000  | #O |
| 1.48024000 | 3.10739000  | 1.51484000  | #O |
| 0.00067000 | 1.08411000  | 0.33209000  | #O |
| 8.87392000 | 7.59073000  | 29.25539000 | #O |
| 1.45760000 | 5.60154000  | 28.00582000 | #O |
| 1.47976000 | 9.62874000  | 28.11390000 | #O |
| 8.86419000 | 7.64043000  | 26.67950000 | #O |
| 0.00322000 | 10.83072000 | 25.92423000 | #O |
| 1.47518000 | 8.88501000  | 24.62884000 | #O |
| 1.47643000 | 6.31462000  | 24.65809000 | #O |
| 0.00335000 | 10.84037000 | 23.33491000 | #O |
| 0.00883000 | 7.58159000  | 22.63874000 | #O |
| 1.48572000 | 5.59825000  | 21.35438000 | #O |
| 1.48178000 | 9.56540000  | 21.34897000 | #O |
| 0.00531000 | 7.58094000  | 20.06541000 | #O |
| 0.00112000 | 10.82420000 | 19.33830000 | #O |
| 1.48029000 | 8.86127000  | 18.07158000 | #O |
| 1.48179000 | 6.29855000  | 18.08120000 | #O |
| 0.00109000 | 10.82294000 | 16.78213000 | #O |
| 0.00245000 | 7.57949000  | 16.08682000 | #O |
| 1.48243000 | 5.59846000  | 14.81006000 | #O |
| 1.48071000 | 9.55857000  | 14.79456000 | #O |
| 8.87596000 | 7.57686000  | 13.51472000 | #O |
| 0.00042000 | 4.33632000  | 12.82609000 | #O |
| 1.47952000 | 8.86110000  | 11.52171000 | #O |
| 1.47907000 | 6.29904000  | 11.52401000 | #O |
| 0.00006000 | 10.82668000 | 10.25155000 | #O |
| 0.00046000 | 7.58149000  | 9.52447000  | #O |
| 1.47902000 | 5.59652000  | 8.24622000  | #O |
| 1.47950000 | 9.56166000  | 8.23878000  | #O |
| 8.87547000 | 7.57975000  | 6.94346000  | #O |
| 0.00022000 | 4.33312000  | 6.25551000  | #O |
| 1.47946000 | 8.86826000  | 4.92001000  | #O |
| 1.47957000 | 6.28946000  | 4.92250000  | #O |
| 0.00021000 | 4.33032000  | 3.67514000  | #O |
| 0.00029000 | 7.57967000  | 2.90156000  | #O |
| 1.47962000 | 5.55560000  | 1.51076000  | #O |
| 1.47910000 | 9.60184000  | 1.50297000  | #O |



|            |             |             |    |
|------------|-------------|-------------|----|
| 0.00061000 | 7.57517000  | 0.31412000  | #O |
| 3.01352000 | 7.56495000  | 29.18317000 | #O |
| 4.44701000 | 5.62544000  | 27.78205000 | #O |
| 4.44208000 | 9.62169000  | 28.06403000 | #O |
| 2.92213000 | 7.66957000  | 26.63516000 | #O |
| 2.95762000 | 10.83615000 | 25.91685000 | #O |
| 4.43818000 | 8.88884000  | 24.62555000 | #O |
| 4.43879000 | 6.31746000  | 24.69153000 | #O |
| 2.95903000 | 10.83956000 | 23.33500000 | #O |
| 2.95959000 | 7.58075000  | 22.65083000 | #O |
| 4.43786000 | 5.60011000  | 21.34759000 | #O |
| 4.43844000 | 9.56554000  | 21.35200000 | #O |
| 2.96083000 | 7.58674000  | 20.06878000 | #O |
| 2.96014000 | 10.82205000 | 19.33844000 | #O |
| 4.44027000 | 8.86223000  | 18.06768000 | #O |
| 4.44006000 | 6.29864000  | 18.08153000 | #O |
| 2.95871000 | 10.82465000 | 16.78229000 | #O |
| 2.96054000 | 7.58075000  | 16.08744000 | #O |
| 4.43791000 | 5.59860000  | 14.81132000 | #O |
| 4.43774000 | 9.55789000  | 14.79367000 | #O |
| 2.95826000 | 7.57636000  | 13.51175000 | #O |
| 2.95877000 | 4.33535000  | 12.82596000 | #O |
| 4.43823000 | 8.86141000  | 11.52089000 | #O |
| 4.43864000 | 6.29905000  | 11.52317000 | #O |
| 2.95901000 | 10.82610000 | 10.25230000 | #O |
| 2.95799000 | 7.58185000  | 9.52314000  | #O |
| 4.43830000 | 5.59712000  | 8.24675000  | #O |
| 4.43822000 | 9.56172000  | 8.23807000  | #O |
| 2.95889000 | 7.57802000  | 6.94198000  | #O |
| 2.95997000 | 4.33546000  | 6.25543000  | #O |
| 4.43882000 | 8.86861000  | 4.92009000  | #O |
| 4.43866000 | 6.28978000  | 4.92008000  | #O |
| 2.95701000 | 4.32919000  | 3.67483000  | #O |
| 2.95807000 | 7.58081000  | 2.90176000  | #O |
| 4.43854000 | 5.55620000  | 1.51205000  | #O |
| 4.43864000 | 9.60193000  | 1.50462000  | #O |
| 2.95970000 | 7.57683000  | 0.31626000  | #O |
| 5.91410000 | 1.13351000  | 29.24904000 | #O |
| 7.39923000 | 12.06664000 | 28.09424000 | #O |
| 7.42509000 | 3.11892000  | 28.04597000 | #O |
| 5.93775000 | 1.04872000  | 26.66567000 | #O |
| 5.95458000 | 4.32595000  | 25.91816000 | #O |
| 7.40221000 | 2.36560000  | 24.64323000 | #O |
| 7.40674000 | 12.78501000 | 24.65132000 | #O |
| 5.89196000 | 4.34615000  | 23.35321000 | #O |
| 5.91953000 | 1.07540000  | 22.63452000 | #O |
| 7.39831000 | 12.08806000 | 21.34240000 | #O |
| 7.39683000 | 3.06898000  | 21.36416000 | #O |
| 5.92044000 | 1.08215000  | 20.05614000 | #O |
| 5.92125000 | 4.32945000  | 19.36518000 | #O |
| 7.39954000 | 2.36287000  | 18.07307000 | #O |
| 7.39892000 | 12.78732000 | 18.06963000 | #O |
| 5.91861000 | 4.33311000  | 16.80604000 | #O |
| 5.91878000 | 1.07870000  | 16.08178000 | #O |
| 7.39679000 | 12.08746000 | 14.79317000 | #O |

|            |             |             |     |
|------------|-------------|-------------|-----|
| 7.39757000 | 3.06900000  | 14.80913000 | #O  |
| 5.91968000 | 1.08379000  | 13.50992000 | #O  |
| 5.91882000 | 10.82312000 | 12.80716000 | #O  |
| 7.39785000 | 2.36701000  | 11.52792000 | #O  |
| 7.39783000 | 12.79010000 | 11.52536000 | #O  |
| 5.91772000 | 4.33361000  | 10.26646000 | #O  |
| 5.91923000 | 1.08147000  | 9.53471000  | #O  |
| 7.39671000 | 12.08604000 | 8.23941000  | #O  |
| 7.39724000 | 3.07222000  | 8.24867000  | #O  |
| 5.91745000 | 1.08405000  | 6.95417000  | #O  |
| 5.91831000 | 10.82171000 | 6.24697000  | #O  |
| 7.39748000 | 2.37281000  | 4.93309000  | #O  |
| 7.39739000 | 12.78341000 | 4.93159000  | #O  |
| 5.91817000 | 10.82897000 | 3.66672000  | #O  |
| 5.91803000 | 1.08026000  | 2.91955000  | #O  |
| 7.39737000 | 12.05041000 | 1.50821000  | #O  |
| 7.39712000 | 3.10727000  | 1.51470000  | #O  |
| 5.91819000 | 1.08302000  | 0.33395000  | #O  |
| 5.88697000 | 7.55024000  | 29.24487000 | #O  |
| 7.42784000 | 5.60469000  | 27.98917000 | #O  |
| 7.40080000 | 9.62453000  | 28.11003000 | #O  |
| 5.94295000 | 7.68466000  | 26.64862000 | #O  |
| 5.92249000 | 10.83383000 | 25.91636000 | #O  |
| 7.40718000 | 8.88715000  | 24.62782000 | #O  |
| 7.40352000 | 6.31483000  | 24.66179000 | #O  |
| 5.92080000 | 10.84070000 | 23.33481000 | #O  |
| 5.90968000 | 7.58188000  | 22.64753000 | #O  |
| 7.39773000 | 5.59855000  | 21.35671000 | #O  |
| 7.39933000 | 9.56509000  | 21.34937000 | #O  |
| 5.91376000 | 7.58544000  | 20.06598000 | #O  |
| 5.91923000 | 10.82196000 | 19.33824000 | #O  |
| 7.39938000 | 8.85985000  | 18.07409000 | #O  |
| 7.39805000 | 6.29980000  | 18.08345000 | #O  |
| 5.92008000 | 10.82334000 | 16.78185000 | #O  |
| 5.91666000 | 7.58109000  | 16.08770000 | #O  |
| 7.39676000 | 5.59752000  | 14.80994000 | #O  |
| 7.39728000 | 9.55943000  | 14.79328000 | #O  |
| 5.91995000 | 7.57562000  | 13.51437000 | #O  |
| 5.91875000 | 4.33559000  | 12.82616000 | #O  |
| 7.39778000 | 8.86090000  | 11.52173000 | #O  |
| 7.39767000 | 6.29936000  | 11.52427000 | #O  |
| 5.91790000 | 10.82576000 | 10.25213000 | #O  |
| 5.91850000 | 7.58218000  | 9.52462000  | #O  |
| 7.39785000 | 5.59626000  | 8.24654000  | #O  |
| 7.39781000 | 9.56192000  | 8.23880000  | #O  |
| 5.91840000 | 7.57784000  | 6.94303000  | #O  |
| 5.91692000 | 4.33567000  | 6.25527000  | #O  |
| 7.39764000 | 8.86828000  | 4.92003000  | #O  |
| 7.39755000 | 6.28958000  | 4.92219000  | #O  |
| 5.91985000 | 4.32924000  | 3.67471000  | #O  |
| 5.91963000 | 7.58072000  | 2.90166000  | #O  |
| 7.39752000 | 5.55543000  | 1.51015000  | #O  |
| 7.39756000 | 9.60179000  | 1.50298000  | #O  |
| 5.91741000 | 7.57624000  | 0.31598000  | #O  |
| 2.96858000 | 4.32812000  | 27.89942000 | #Ti |

|            |             |             |     |
|------------|-------------|-------------|-----|
| 4.44450000 | 1.08870000  | 28.15268000 | #Ti |
| 2.96479000 | 1.08225000  | 24.83238000 | #Ti |
| 4.44049000 | 4.33268000  | 24.71896000 | #Ti |
| 2.96645000 | 4.32933000  | 21.33515000 | #Ti |
| 4.43994000 | 1.07775000  | 21.43190000 | #Ti |
| 2.96102000 | 1.08418000  | 18.13183000 | #Ti |
| 4.43894000 | 4.33379000  | 18.10025000 | #Ti |
| 2.95899000 | 10.82406000 | 14.80366000 | #Ti |
| 4.43690000 | 1.08259000  | 14.80111000 | #Ti |
| 2.95950000 | 1.08403000  | 11.47116000 | #Ti |
| 4.43817000 | 10.82728000 | 11.57091000 | #Ti |
| 2.95913000 | 10.82665000 | 8.35453000  | #Ti |
| 4.44006000 | 1.08437000  | 8.16646000  | #Ti |
| 2.95923000 | 1.08280000  | 4.76024000  | #Ti |
| 4.43844000 | 10.82717000 | 5.08145000  | #Ti |
| 2.95909000 | 10.82629000 | 1.86286000  | #Ti |
| 4.43857000 | 1.08315000  | 1.41615000  | #Ti |
| 0.00928000 | 4.36013000  | 27.66884000 | #Ti |
| 1.48243000 | 1.10061000  | 28.17440000 | #Ti |
| 8.87458000 | 1.09550000  | 24.83285000 | #Ti |
| 1.52169000 | 4.31814000  | 24.51918000 | #Ti |
| 0.00052000 | 4.33204000  | 21.30273000 | #Ti |
| 1.47969000 | 1.08430000  | 21.42870000 | #Ti |
| 0.00562000 | 1.08457000  | 18.12610000 | #Ti |
| 1.48523000 | 4.33306000  | 18.08207000 | #Ti |
| 0.00096000 | 10.82794000 | 14.80123000 | #Ti |
| 1.48157000 | 1.08394000  | 14.79853000 | #Ti |
| 0.00230000 | 1.08472000  | 11.47858000 | #Ti |
| 1.47981000 | 10.82838000 | 11.56965000 | #Ti |
| 0.00070000 | 10.82695000 | 8.35317000  | #Ti |
| 1.47878000 | 1.08442000  | 8.16707000  | #Ti |
| 0.00052000 | 1.08299000  | 4.76135000  | #Ti |
| 1.47966000 | 10.82680000 | 5.07982000  | #Ti |
| 0.00041000 | 10.82674000 | 1.86270000  | #Ti |
| 1.47934000 | 1.08339000  | 1.41587000  | #Ti |
| 0.00332000 | 10.85542000 | 27.72993000 | #Ti |
| 1.50705000 | 7.59647000  | 28.13707000 | #Ti |
| 0.01310000 | 7.58942000  | 24.81769000 | #Ti |
| 1.47937000 | 10.85122000 | 24.50808000 | #Ti |
| 8.87604000 | 10.82751000 | 21.24643000 | #Ti |
| 1.45865000 | 7.57587000  | 21.33041000 | #Ti |
| 8.87343000 | 7.57928000  | 18.10807000 | #Ti |
| 1.47982000 | 10.82867000 | 18.03336000 | #Ti |
| 0.00099000 | 4.32931000  | 14.85071000 | #Ti |
| 1.46209000 | 7.57537000  | 14.74144000 | #Ti |
| 8.87435000 | 7.57957000  | 11.44100000 | #Ti |
| 1.48064000 | 4.33225000  | 11.60141000 | #Ti |
| 0.00064000 | 4.33035000  | 8.38022000  | #Ti |
| 1.47682000 | 7.57654000  | 8.14032000  | #Ti |
| 0.00037000 | 7.57758000  | 4.73892000  | #Ti |
| 1.47952000 | 4.33072000  | 5.09382000  | #Ti |
| 0.00059000 | 4.33062000  | 1.87291000  | #Ti |
| 1.47928000 | 7.57702000  | 1.39739000  | #Ti |
| 2.96206000 | 10.84173000 | 27.72027000 | #Ti |
| 4.34573000 | 7.58348000  | 27.85889000 | #Ti |

|            |             |             |     |
|------------|-------------|-------------|-----|
| 2.95292000 | 7.58822000  | 24.57429000 | #Ti |
| 4.44065000 | 10.83725000 | 24.50272000 | #Ti |
| 2.95738000 | 10.82755000 | 21.24753000 | #Ti |
| 4.44518000 | 7.58343000  | 21.30235000 | #Ti |
| 2.95884000 | 7.58060000  | 17.99467000 | #Ti |
| 4.43873000 | 10.82827000 | 18.03161000 | #Ti |
| 2.96026000 | 4.33151000  | 14.85612000 | #Ti |
| 4.45364000 | 7.57661000  | 14.73249000 | #Ti |
| 2.95867000 | 7.57878000  | 11.42550000 | #Ti |
| 4.43825000 | 4.33276000  | 11.60183000 | #Ti |
| 2.95935000 | 4.33122000  | 8.37886000  | #Ti |
| 4.44102000 | 7.57700000  | 8.13978000  | #Ti |
| 2.95934000 | 7.57847000  | 4.73798000  | #Ti |
| 4.43843000 | 4.33059000  | 5.09236000  | #Ti |
| 2.95913000 | 4.33101000  | 1.87287000  | #Ti |
| 4.43861000 | 7.57733000  | 1.39807000  | #Ti |
| 5.93178000 | 4.34098000  | 27.88501000 | #Ti |
| 7.40253000 | 1.10118000  | 28.17240000 | #Ti |
| 5.92396000 | 1.08469000  | 24.83027000 | #Ti |
| 7.36120000 | 4.33693000  | 24.50944000 | #Ti |
| 5.91376000 | 4.33330000  | 21.32941000 | #Ti |
| 7.39983000 | 1.08501000  | 21.42705000 | #Ti |
| 5.91572000 | 1.08432000  | 18.13115000 | #Ti |
| 7.39414000 | 4.32280000  | 18.07602000 | #Ti |
| 5.91872000 | 10.82683000 | 14.80125000 | #Ti |
| 7.39646000 | 1.08423000  | 14.80327000 | #Ti |
| 5.91648000 | 1.08441000  | 11.47900000 | #Ti |
| 7.39771000 | 10.83310000 | 11.56885000 | #Ti |
| 5.91792000 | 10.82684000 | 8.35452000  | #Ti |
| 7.39703000 | 1.08435000  | 8.17291000  | #Ti |
| 5.91817000 | 1.08272000  | 4.76050000  | #Ti |
| 7.39718000 | 10.82681000 | 5.08015000  | #Ti |
| 5.91794000 | 10.82634000 | 1.86294000  | #Ti |
| 7.39786000 | 1.08336000  | 1.41581000  | #Ti |
| 5.91978000 | 10.83114000 | 27.72005000 | #Ti |
| 7.45348000 | 7.59903000  | 28.14450000 | #Ti |
| 5.92685000 | 7.59535000  | 24.77772000 | #Ti |
| 7.40086000 | 10.83742000 | 24.50572000 | #Ti |
| 5.92093000 | 10.82730000 | 21.24496000 | #Ti |
| 7.39198000 | 7.57775000  | 21.49482000 | #Ti |
| 5.92235000 | 7.58068000  | 18.09130000 | #Ti |
| 7.39819000 | 10.83905000 | 18.02944000 | #Ti |
| 5.91716000 | 4.32951000  | 14.85316000 | #Ti |
| 7.40000000 | 7.57590000  | 14.82329000 | #Ti |
| 5.92115000 | 7.57919000  | 11.44112000 | #Ti |
| 7.39699000 | 4.32816000  | 11.60051000 | #Ti |
| 5.91788000 | 4.33106000  | 8.37904000  | #Ti |
| 7.39702000 | 7.57673000  | 8.15153000  | #Ti |
| 5.91828000 | 7.57843000  | 4.73783000  | #Ti |
| 7.39724000 | 4.33067000  | 5.09370000  | #Ti |
| 5.91818000 | 4.33106000  | 1.87275000  | #Ti |
| 7.39784000 | 7.57689000  | 1.39708000  | #Ti |

*Water adsorption on the (110) rutile surface*

H<sub>2</sub>O-4layer

1.000000000

5.953169 0.000000 0.000000

0.000000 13.020442 0.000000

0.000000 0.000000 30.000000

H O Ti

2 65 32

Cartesian

|            |             |             |    |
|------------|-------------|-------------|----|
| 0.83975000 | 8.71303000  | 18.67729000 | #H |
| 1.56243000 | 10.01853000 | 18.14337000 | #H |
| 4.48711000 | 11.76925000 | 17.43730000 | #O |
| 5.92437000 | 9.82139000  | 16.09708000 | #O |
| 0.02055000 | 0.80411000  | 16.27574000 | #O |
| 4.48051000 | 11.87508000 | 14.86939000 | #O |
| 4.47372000 | 2.00639000  | 14.09169000 | #O |
| 0.01177000 | 0.05503000  | 12.82452000 | #O |
| 0.00465000 | 10.50634000 | 12.87209000 | #O |
| 4.47248000 | 2.02320000  | 11.51011000 | #O |
| 4.47035000 | 11.76704000 | 10.83964000 | #O |
| 0.01051000 | 9.80188000  | 9.51322000  | #O |
| 0.00814000 | 0.71913000  | 9.50148000  | #O |
| 4.46738000 | 11.76075000 | 8.26063000  | #O |
| 4.47094000 | 8.54150000  | 7.48056000  | #O |
| 0.00455000 | 13.01968200 | 6.12182000  | #O |
| 0.00495000 | 10.55927000 | 6.08903000  | #O |
| 4.47529000 | 8.52358000  | 4.90292000  | #O |
| 1.51250000 | 11.67400000 | 17.45449000 | #O |
| 3.03524000 | 9.81962000  | 16.09338000 | #O |
| 2.98434000 | 0.80522000  | 16.27913000 | #O |
| 1.50618000 | 11.86933000 | 14.87432000 | #O |
| 1.49548000 | 2.00843000  | 14.08777000 | #O |
| 2.98400000 | 0.05478000  | 12.82304000 | #O |
| 2.98660000 | 10.50529000 | 12.87747000 | #O |
| 1.49734000 | 2.02381000  | 11.50872000 | #O |
| 1.49448000 | 11.76711000 | 10.83918000 | #O |
| 2.98447000 | 9.80295000  | 9.51017000  | #O |
| 2.98465000 | 0.71890000  | 9.49993000  | #O |
| 1.48944000 | 11.76160000 | 8.26031000  | #O |
| 1.49578000 | 8.53949000  | 7.47657000  | #O |
| 2.98117000 | 13.01947200 | 6.12249000  | #O |
| 2.98094000 | 10.55961000 | 6.08895000  | #O |
| 1.49860000 | 8.52341000  | 4.90293000  | #O |
| 4.48499000 | 5.27768000  | 17.46596000 | #O |
| 0.00994000 | 3.26583000  | 16.22914000 | #O |
| 0.01304000 | 7.32933000  | 16.28035000 | #O |
| 4.49323000 | 5.29264000  | 14.89140000 | #O |
| 4.48252000 | 8.48635000  | 14.05607000 | #O |
| 0.01435000 | 6.54742000  | 12.83852000 | #O |
| 0.00899000 | 3.98569000  | 12.85961000 | #O |
| 4.47393000 | 8.53090000  | 11.51838000 | #O |
| 4.46921000 | 5.25387000  | 10.83932000 | #O |
| 0.00955000 | 3.28962000  | 9.50265000  | #O |
| 0.00754000 | 7.22924000  | 9.50530000  | #O |

|            |             |             |     |
|------------|-------------|-------------|-----|
| 4.46846000 | 5.25193000  | 8.26046000  | #O  |
| 4.47567000 | 2.02287000  | 7.46508000  | #O  |
| 0.00426000 | 6.50978000  | 6.12689000  | #O  |
| 0.00486000 | 4.04737000  | 6.08854000  | #O  |
| 4.47659000 | 2.01128000  | 4.89041000  | #O  |
| 1.51011000 | 5.28683000  | 17.46610000 | #O  |
| 2.99024000 | 3.26740000  | 16.22294000 | #O  |
| 3.00749000 | 7.31477000  | 16.23225000 | #O  |
| 1.50170000 | 5.28292000  | 14.89662000 | #O  |
| 1.49448000 | 8.51248000  | 14.10764000 | #O  |
| 2.98292000 | 6.54929000  | 12.84679000 | #O  |
| 2.98792000 | 3.98670000  | 12.86504000 | #O  |
| 1.50304000 | 8.52793000  | 11.51239000 | #O  |
| 1.49468000 | 5.25543000  | 10.83872000 | #O  |
| 2.98684000 | 3.28920000  | 9.50227000  | #O  |
| 2.98407000 | 7.22895000  | 9.50273000  | #O  |
| 1.49072000 | 5.25185000  | 8.26054000  | #O  |
| 1.49896000 | 2.02377000  | 7.46478000  | #O  |
| 2.98060000 | 6.50978000  | 6.12713000  | #O  |
| 2.98179000 | 4.04741000  | 6.08879000  | #O  |
| 1.50018000 | 2.01070000  | 4.89018000  | #O  |
| 1.60203000 | 9.01841000  | 18.15934000 | #O  |
| 4.47697000 | 2.03572000  | 15.88167000 | #Ti |
| 0.01636000 | 11.80524000 | 16.34655000 | #Ti |
| 4.47558000 | 11.81029000 | 13.04705000 | #Ti |
| 0.00868000 | 2.04076000  | 12.64498000 | #Ti |
| 4.47469000 | 8.52506000  | 9.29921000  | #Ti |
| 0.00712000 | 11.77703000 | 9.69873000  | #Ti |
| 4.46875000 | 11.78450000 | 6.46673000  | #Ti |
| 0.01168000 | 8.53422000  | 5.97392000  | #Ti |
| 1.49816000 | 2.04021000  | 15.87846000 | #Ti |
| 3.01256000 | 11.81545000 | 16.34748000 | #Ti |
| 1.49888000 | 11.80379000 | 13.05822000 | #Ti |
| 2.98437000 | 2.04056000  | 12.64624000 | #Ti |
| 1.49853000 | 8.52339000  | 9.29076000  | #Ti |
| 2.98214000 | 11.77714000 | 9.69760000  | #Ti |
| 1.49206000 | 11.78601000 | 6.46585000  | #Ti |
| 2.98919000 | 8.53424000  | 5.97395000  | #Ti |
| 4.48326000 | 8.56505000  | 15.83760000 | #Ti |
| 0.01958000 | 5.30183000  | 16.39166000 | #Ti |
| 4.47816000 | 5.29218000  | 13.07293000 | #Ti |
| 0.02262000 | 8.54624000  | 12.66402000 | #Ti |
| 4.47390000 | 2.01387000  | 9.27887000  | #Ti |
| 0.00686000 | 5.26873000  | 9.70265000  | #Ti |
| 4.46891000 | 5.27536000  | 6.46832000  | #Ti |
| 0.01144000 | 2.02428000  | 5.96141000  | #Ti |
| 1.51636000 | 8.53844000  | 15.96128000 | #Ti |
| 2.99760000 | 5.30115000  | 16.38995000 | #Ti |
| 1.50049000 | 5.28936000  | 13.07821000 | #Ti |
| 2.97728000 | 8.54545000  | 12.66967000 | #Ti |
| 1.49737000 | 2.01431000  | 9.27870000  | #Ti |
| 2.98304000 | 5.26870000  | 9.70101000  | #Ti |
| 1.49219000 | 5.27553000  | 6.46823000  | #Ti |
| 2.98800000 | 2.02432000  | 5.96145000  | #Ti |

H<sub>2</sub>O-5layer

1.00000000

|          |           |           |
|----------|-----------|-----------|
| 5.953169 | 0.000000  | 0.000000  |
| 0.000000 | 13.020442 | 0.000000  |
| 0.000000 | 0.000000  | 30.000000 |

H O Ti

2 81 40

Cartesian

|            |             |             |    |
|------------|-------------|-------------|----|
| 0.84857000 | 8.75392000  | 18.68143000 | #H |
| 1.54876000 | 10.06276000 | 18.08508000 | #H |
| 4.49425000 | 11.74962000 | 17.32864000 | #O |
| 5.92800900 | 9.79116000  | 16.05261000 | #O |
| 0.03272000 | 0.79496000  | 16.26776000 | #O |
| 4.48843000 | 11.86215000 | 14.76928000 | #O |
| 4.48732000 | 1.98744000  | 14.09276000 | #O |
| 0.02518000 | 0.06067000  | 12.78077000 | #O |
| 0.02037000 | 10.47799000 | 12.82922000 | #O |
| 4.48259000 | 2.01324000  | 11.52443000 | #O |
| 4.49145000 | 11.76301000 | 10.82521000 | #O |
| 0.01832000 | 9.76987000  | 9.52943000  | #O |
| 0.01757000 | 0.74285000  | 9.53112000  | #O |
| 4.48899000 | 11.77054000 | 8.22650000  | #O |
| 4.48288000 | 8.52491000  | 7.54087000  | #O |
| 0.02019000 | 0.06116000  | 6.23923000  | #O |
| 0.02198000 | 10.47859000 | 6.24227000  | #O |
| 4.48195000 | 8.51912000  | 4.98065000  | #O |
| 4.48355000 | 11.78717000 | 4.26269000  | #O |
| 0.01585000 | 9.75227000  | 2.84422000  | #O |
| 0.01636000 | 0.79443000  | 2.82875000  | #O |
| 4.47987000 | 11.78346000 | 1.69267000  | #O |
| 1.51670000 | 11.64060000 | 17.34505000 | #O |
| 3.04541000 | 9.78608000  | 16.05818000 | #O |
| 2.98971000 | 0.79649000  | 16.27332000 | #O |
| 1.51480000 | 11.85656000 | 14.77472000 | #O |
| 1.50844000 | 1.99356000  | 14.08940000 | #O |
| 2.99870000 | 0.06098000  | 12.78123000 | #O |
| 3.00342000 | 10.47678000 | 12.83193000 | #O |
| 1.50825000 | 2.01577000  | 11.52401000 | #O |
| 1.51726000 | 11.75903000 | 10.82675000 | #O |
| 2.99168000 | 9.77107000  | 9.52698000  | #O |
| 2.99340000 | 0.74274000  | 9.53010000  | #O |
| 1.50759000 | 11.77428000 | 8.23014000  | #O |
| 1.50453000 | 8.52308000  | 7.53979000  | #O |
| 2.99665000 | 0.06081000  | 6.24031000  | #O |
| 2.99646000 | 10.47913000 | 6.24374000  | #O |
| 1.50701000 | 8.51888000  | 4.98025000  | #O |
| 1.50727000 | 11.78760000 | 4.26295000  | #O |
| 2.99298000 | 9.75230000  | 2.84275000  | #O |
| 2.99279000 | 0.79414000  | 2.82914000  | #O |
| 1.50340000 | 11.78360000 | 1.69276000  | #O |
| 4.48711000 | 5.27109000  | 17.35472000 | #O |
| 0.01702000 | 3.23907000  | 16.21814000 | #O |
| 0.02401000 | 7.32367000  | 16.27119000 | #O |
| 4.49332000 | 5.28545000  | 14.78912000 | #O |
| 4.49047000 | 8.45615000  | 14.04696000 | #O |

|            |             |             |     |
|------------|-------------|-------------|-----|
| 0.02704000 | 6.55450000  | 12.79428000 | #O  |
| 0.02079000 | 3.95529000  | 12.81915000 | #O  |
| 4.48122000 | 8.52279000  | 11.52742000 | #O  |
| 4.49012000 | 5.24924000  | 10.82759000 | #O  |
| 0.01592000 | 3.25720000  | 9.52645000  | #O  |
| 0.01797000 | 7.25323000  | 9.53029000  | #O  |
| 4.49208000 | 5.25534000  | 8.22768000  | #O  |
| 4.48201000 | 2.00840000  | 7.53409000  | #O  |
| 0.02138000 | 6.57099000  | 6.24525000  | #O  |
| 0.02161000 | 3.96414000  | 6.24252000  | #O  |
| 4.48113000 | 2.00826000  | 4.97299000  | #O  |
| 4.48401000 | 5.27317000  | 4.27004000  | #O  |
| 0.01672000 | 3.23934000  | 2.83824000  | #O  |
| 0.01585000 | 7.30637000  | 2.83767000  | #O  |
| 4.48045000 | 5.27253000  | 1.70042000  | #O  |
| 1.51363000 | 5.27340000  | 17.35182000 | #O  |
| 3.00349000 | 3.23915000  | 16.21026000 | #O  |
| 3.00276000 | 7.30675000  | 16.21021000 | #O  |
| 1.50525000 | 5.27555000  | 14.78758000 | #O  |
| 1.50568000 | 8.49529000  | 14.09531000 | #O  |
| 2.99791000 | 6.55466000  | 12.80019000 | #O  |
| 3.00234000 | 3.95631000  | 12.82218000 | #O  |
| 1.51058000 | 8.51956000  | 11.52356000 | #O  |
| 1.51545000 | 5.24638000  | 10.82649000 | #O  |
| 2.99330000 | 3.25651000  | 9.52508000  | #O  |
| 2.99208000 | 7.25473000  | 9.52910000  | #O  |
| 1.51370000 | 5.25559000  | 8.22753000  | #O  |
| 1.50497000 | 2.00879000  | 7.53432000  | #O  |
| 2.99794000 | 6.57096000  | 6.24677000  | #O  |
| 2.99839000 | 3.96426000  | 6.24378000  | #O  |
| 1.50507000 | 2.00875000  | 4.97311000  | #O  |
| 1.50832000 | 5.27313000  | 4.26991000  | #O  |
| 2.99315000 | 3.23920000  | 2.83742000  | #O  |
| 2.99375000 | 7.30604000  | 2.83731000  | #O  |
| 1.50366000 | 5.27277000  | 1.70023000  | #O  |
| 1.59640000 | 9.05741000  | 18.13757000 | #O  |
| 4.48896000 | 2.00545000  | 15.90094000 | #Ti |
| 0.02016000 | 11.78311000 | 16.22258000 | #Ti |
| 4.48268000 | 11.84512000 | 12.87898000 | #Ti |
| 0.01419000 | 2.08579000  | 12.71227000 | #Ti |
| 4.40272000 | 8.51610000  | 9.57378000  | #Ti |
| 5.82361000 | 11.76434000 | 9.50746000  | #Ti |
| 4.47890000 | 11.84400000 | 6.12072000  | #Ti |
| 0.00860000 | 8.60003000  | 6.35556000  | #Ti |
| 4.48155000 | 8.52575000  | 3.17151000  | #Ti |
| 0.01274000 | 11.78017000 | 2.77095000  | #Ti |
| 1.50954000 | 2.02197000  | 15.89768000 | #Ti |
| 3.02141000 | 11.79244000 | 16.22756000 | #Ti |
| 1.50545000 | 11.84505000 | 12.90218000 | #Ti |
| 2.99093000 | 2.08453000  | 12.71475000 | #Ti |
| 1.42668000 | 8.50418000  | 9.53554000  | #Ti |
| 2.84228000 | 11.76420000 | 9.52324000  | #Ti |
| 1.50326000 | 11.84138000 | 6.12011000  | #Ti |
| 2.99367000 | 8.59874000  | 6.35984000  | #Ti |
| 1.50529000 | 8.52547000  | 3.17449000  | #Ti |



|            |             |             |     |
|------------|-------------|-------------|-----|
| 2.98975000 | 11.78009000 | 2.77098000  | #Ti |
| 4.49340000 | 8.54926000  | 15.84434000 | #Ti |
| 0.02298000 | 5.27744000  | 16.27125000 | #Ti |
| 4.48467000 | 5.33383000  | 12.91555000 | #Ti |
| 0.03302000 | 8.59429000  | 12.73493000 | #Ti |
| 4.39582000 | 1.99892000  | 9.52871000  | #Ti |
| 5.81802000 | 5.25728000  | 9.52636000  | #Ti |
| 4.48048000 | 5.33308000  | 6.13142000  | #Ti |
| 0.01246000 | 2.08827000  | 6.34309000  | #Ti |
| 4.48200000 | 2.01487000  | 3.16344000  | #Ti |
| 0.01336000 | 5.27165000  | 2.77920000  | #Ti |
| 1.52589000 | 8.50591000  | 15.99770000 | #Ti |
| 3.00357000 | 5.27298000  | 16.26996000 | #Ti |
| 1.50786000 | 5.32646000  | 12.91952000 | #Ti |
| 2.96895000 | 8.59367000  | 12.75023000 | #Ti |
| 1.41959000 | 2.00255000  | 9.52870000  | #Ti |
| 2.84124000 | 5.25854000  | 9.52636000  | #Ti |
| 1.50313000 | 5.33448000  | 6.13187000  | #Ti |
| 2.98888000 | 2.08931000  | 6.34344000  | #Ti |
| 1.50536000 | 2.01433000  | 3.16320000  | #Ti |
| 2.98991000 | 5.27169000  | 2.77929000  | #Ti |

H<sub>2</sub>O-6layer

1.000000000

|          |           |           |
|----------|-----------|-----------|
| 5.953169 | 0.000000  | 0.000000  |
| 0.000000 | 13.020442 | 0.000000  |
| 0.000000 | 0.000000  | 35.000000 |

H O Ti

2 97 48

Cartesian

|            |            |             |    |
|------------|------------|-------------|----|
| 2.98435000 | 6.32694000 | 20.20386000 | #H |
| 2.24936000 | 5.00950000 | 20.69593000 | #H |
| 5.95223900 | 1.62291000 | 19.46054000 | #O |
| 1.43594000 | 6.15033000 | 18.13317000 | #O |
| 1.47935000 | 3.66225000 | 18.29504000 | #O |
| 0.00248000 | 1.62970000 | 16.89281000 | #O |
| 0.00041000 | 4.84735000 | 16.08214000 | #O |
| 1.48993000 | 2.90560000 | 14.86621000 | #O |
| 1.48625000 | 0.33220000 | 14.87663000 | #O |
| 5.95234900 | 4.88437000 | 13.54877000 | #O |
| 5.95271900 | 1.62347000 | 12.87391000 | #O |
| 1.48864000 | 6.15481000 | 11.55518000 | #O |
| 1.48906000 | 3.60571000 | 11.55640000 | #O |
| 5.95248900 | 1.62596000 | 10.31092000 | #O |
| 5.95294900 | 4.88231000 | 9.54257000  | #O |
| 1.48747000 | 2.89836000 | 8.28643000  | #O |
| 1.48664000 | 0.35479000 | 8.28628000  | #O |
| 5.95288900 | 4.88253000 | 6.97857000  | #O |
| 5.95294900 | 1.62537000 | 6.29735000  | #O |
| 1.48813000 | 6.17235000 | 4.97817000  | #O |
| 1.48843000 | 3.59453000 | 4.97634000  | #O |
| 5.95315900 | 1.62860000 | 3.72340000  | #O |
| 0.00012000 | 4.88687000 | 2.95447000  | #O |
| 1.48864000 | 2.86364000 | 1.57406000  | #O |

|            |             |             |    |
|------------|-------------|-------------|----|
| 1.48923000 | 0.40346000  | 1.57182000  | #O |
| 5.95314900 | 4.88451000  | 0.37465000  | #O |
| 0.00013000 | 8.12000000  | 19.45489000 | #O |
| 1.48548000 | 12.61678000 | 18.25904000 | #O |
| 1.49963000 | 10.15712000 | 18.29928000 | #O |
| 5.94713900 | 8.18695000  | 16.88716000 | #O |
| 0.00043000 | 11.38073000 | 16.12541000 | #O |
| 1.48878000 | 9.43130000  | 14.86484000 | #O |
| 1.48738000 | 6.85559000  | 14.88285000 | #O |
| 5.95304900 | 11.39531000 | 13.54531000 | #O |
| 5.95254900 | 8.13723000  | 12.87432000 | #O |
| 1.48793000 | 12.66270000 | 11.55292000 | #O |
| 1.48806000 | 10.11727000 | 11.55339000 | #O |
| 5.95299900 | 8.13765000  | 10.31101000 | #O |
| 5.95296900 | 11.39057000 | 9.53294000  | #O |
| 1.48686000 | 9.40925000  | 8.28615000  | #O |
| 1.48768000 | 6.86657000  | 8.28661000  | #O |
| 5.95251900 | 11.39243000 | 6.97414000  | #O |
| 5.95276900 | 8.13986000  | 6.29761000  | #O |
| 1.48821000 | 12.68052000 | 4.97197000  | #O |
| 1.48791000 | 10.10481000 | 4.96913000  | #O |
| 0.00002000 | 8.13714000  | 3.72325000  | #O |
| 5.95275900 | 11.40028000 | 2.94652000  | #O |
| 1.48906000 | 9.37411000  | 1.57371000  | #O |
| 1.48932000 | 6.91395000  | 1.57261000  | #O |
| 0.00007000 | 11.39685000 | 0.36944000  | #O |
| 2.97658000 | 1.62751000  | 19.45856000 | #O |
| 4.50103000 | 6.14272000  | 18.14545000 | #O |
| 4.46898000 | 3.65008000  | 18.24154000 | #O |
| 2.97172000 | 1.62441000  | 16.89408000 | #O |
| 2.97085000 | 4.87211000  | 16.13485000 | #O |
| 4.46150000 | 2.90650000  | 14.87027000 | #O |
| 4.46586000 | 0.33388000  | 14.87752000 | #O |
| 2.97676000 | 4.88295000  | 13.54210000 | #O |
| 2.97601000 | 1.62075000  | 12.87399000 | #O |
| 4.46403000 | 6.15496000  | 11.55480000 | #O |
| 4.46392000 | 3.60541000  | 11.55687000 | #O |
| 2.97620000 | 1.62674000  | 10.31060000 | #O |
| 2.97647000 | 4.88164000  | 9.53876000  | #O |
| 4.46401000 | 2.89828000  | 8.28643000  | #O |
| 4.46317000 | 0.35486000  | 8.28583000  | #O |
| 2.97652000 | 4.88254000  | 6.97895000  | #O |
| 2.97638000 | 1.62519000  | 6.29719000  | #O |
| 4.46494000 | 6.17234000  | 4.97801000  | #O |
| 4.46470000 | 3.59461000  | 4.97707000  | #O |
| 2.97672000 | 1.62852000  | 3.72340000  | #O |
| 2.97729000 | 4.88767000  | 2.95454000  | #O |
| 4.46546000 | 2.86360000  | 1.57428000  | #O |
| 4.46581000 | 0.40341000  | 1.57187000  | #O |
| 2.97658000 | 4.88475000  | 0.37435000  | #O |
| 2.97439000 | 8.01035000  | 19.47796000 | #O |
| 4.47144000 | 12.61685000 | 18.25655000 | #O |
| 4.45636000 | 10.15736000 | 18.30331000 | #O |
| 2.97575000 | 8.18393000  | 16.89365000 | #O |
| 2.97799000 | 11.38288000 | 16.12170000 | #O |

|            |             |             |     |
|------------|-------------|-------------|-----|
| 4.46290000 | 9.43138000  | 14.86455000 | #O  |
| 4.46504000 | 6.85537000  | 14.88439000 | #O  |
| 2.97663000 | 11.39566000 | 13.54400000 | #O  |
| 2.97623000 | 8.13676000  | 12.87381000 | #O  |
| 4.46495000 | 12.66259000 | 11.55287000 | #O  |
| 4.46461000 | 10.11726000 | 11.55292000 | #O  |
| 2.97655000 | 8.13751000  | 10.31094000 | #O  |
| 2.97659000 | 11.39150000 | 9.53214000  | #O  |
| 4.46332000 | 9.40950000  | 8.28586000  | #O  |
| 4.46397000 | 6.86657000  | 8.28654000  | #O  |
| 2.97596000 | 11.39247000 | 6.97398000  | #O  |
| 2.97616000 | 8.13977000  | 6.29740000  | #O  |
| 4.46497000 | 12.68060000 | 4.97189000  | #O  |
| 4.46472000 | 10.10488000 | 4.96913000  | #O  |
| 2.97653000 | 8.13687000  | 3.72329000  | #O  |
| 2.97633000 | 11.40053000 | 2.94642000  | #O  |
| 4.46538000 | 9.37412000  | 1.57385000  | #O  |
| 4.46605000 | 6.91352000  | 1.57220000  | #O  |
| 2.97662000 | 11.39666000 | 0.36945000  | #O  |
| 3.02629000 | 5.32950000  | 20.20440000 | #O  |
| 0.00036000 | 4.89693000  | 17.86907000 | #Ti |
| 1.48673000 | 1.63371000  | 18.38414000 | #Ti |
| 5.95227900 | 1.63329000  | 15.06395000 | #Ti |
| 1.50225000 | 4.88580000  | 14.71277000 | #Ti |
| 5.95249900 | 4.88092000  | 11.40905000 | #Ti |
| 1.48781000 | 1.62612000  | 11.70359000 | #Ti |
| 5.95169900 | 1.62596000  | 8.45579000  | #Ti |
| 1.48638000 | 4.88065000  | 8.14939000  | #Ti |
| 5.95291900 | 4.88236000  | 4.77877000  | #Ti |
| 1.48797000 | 1.62607000  | 5.14878000  | #Ti |
| 0.00058000 | 1.63180000  | 1.92709000  | #Ti |
| 1.48844000 | 4.88614000  | 1.44900000  | #Ti |
| 0.00252000 | 11.38601000 | 17.91895000 | #Ti |
| 1.48152000 | 8.13651000  | 18.36100000 | #Ti |
| 5.95239900 | 8.14671000  | 15.05299000 | #Ti |
| 1.48823000 | 11.40038000 | 14.69325000 | #Ti |
| 5.95230900 | 11.39063000 | 11.38711000 | #Ti |
| 1.48813000 | 8.13550000  | 11.70085000 | #Ti |
| 5.95184900 | 8.13671000  | 8.45469000  | #Ti |
| 1.48701000 | 11.39143000 | 8.14031000  | #Ti |
| 5.95287900 | 11.39249000 | 4.77049000  | #Ti |
| 1.48783000 | 8.13643000  | 5.14874000  | #Ti |
| 0.00068000 | 8.14204000  | 1.92712000  | #Ti |
| 1.48886000 | 11.39707000 | 1.44330000  | #Ti |
| 2.98632000 | 4.87270000  | 17.99868000 | #Ti |
| 4.46616000 | 1.63261000  | 18.38403000 | #Ti |
| 2.97566000 | 1.63140000  | 15.06746000 | #Ti |
| 4.45355000 | 4.88587000  | 14.70978000 | #Ti |
| 2.97575000 | 4.87993000  | 11.39558000 | #Ti |
| 4.46379000 | 1.62633000  | 11.70346000 | #Ti |
| 2.97514000 | 1.62633000  | 8.45513000  | #Ti |
| 4.46580000 | 4.88064000  | 8.14936000  | #Ti |
| 2.97638000 | 4.88210000  | 4.77954000  | #Ti |
| 4.46469000 | 1.62612000  | 5.14878000  | #Ti |
| 2.97723000 | 1.63184000  | 1.92710000  | #Ti |

|            |             |             |     |
|------------|-------------|-------------|-----|
| 4.46470000 | 4.88622000  | 1.44884000  | #Ti |
| 2.97753000 | 11.39624000 | 17.91584000 | #Ti |
| 4.47361000 | 8.14407000  | 18.36793000 | #Ti |
| 2.97559000 | 8.14508000  | 15.06366000 | #Ti |
| 4.46411000 | 11.39919000 | 14.69319000 | #Ti |
| 2.97578000 | 11.39122000 | 11.38687000 | #Ti |
| 4.46303000 | 8.13524000  | 11.70062000 | #Ti |
| 2.97523000 | 8.13615000  | 8.45335000  | #Ti |
| 4.46356000 | 11.39144000 | 8.14011000  | #Ti |
| 2.97630000 | 11.39249000 | 4.77047000  | #Ti |
| 4.46462000 | 8.13640000  | 5.14859000  | #Ti |
| 2.97727000 | 8.14195000  | 1.92733000  | #Ti |
| 4.46540000 | 11.39706000 | 1.44328000  | #Ti |

H<sub>2</sub>O-7layer

1.000000000

|          |           |           |
|----------|-----------|-----------|
| 5.953169 | 0.000000  | 0.000000  |
| 0.000000 | 13.020442 | 0.000000  |
| 0.000000 | 0.000000  | 35.000000 |

H O Ti

2 113 56

Cartesian

|            |             |             |    |
|------------|-------------|-------------|----|
| 5.74699000 | 8.36489000  | 24.17192000 | #H |
| 0.86915000 | 9.35582000  | 24.41179000 | #H |
| 0.00077000 | 0.00383000  | 22.85487000 | #O |
| 1.48752000 | 4.44338000  | 21.70941000 | #O |
| 1.48857000 | 2.06751000  | 21.70892000 | #O |
| 0.00029000 | 6.50855000  | 20.32007000 | #O |
| 5.95310900 | 3.25493000  | 19.75800000 | #O |
| 1.48832000 | 1.29304000  | 18.41384000 | #O |
| 1.48817000 | 5.21643000  | 18.41377000 | #O |
| 0.00000000 | 3.25507000  | 17.15733000 | #O |
| 0.00014000 | 0.00030000  | 16.43038000 | #O |
| 1.48811000 | 4.52629000  | 15.16329000 | #O |
| 1.48850000 | 1.98350000  | 15.16327000 | #O |
| 0.00010000 | 6.51016000  | 13.88570000 | #O |
| 0.00003000 | 3.25505000  | 13.18501000 | #O |
| 1.48830000 | 1.27528000  | 11.90725000 | #O |
| 1.48825000 | 5.23486000  | 11.90720000 | #O |
| 5.95309900 | 3.25511000  | 10.62987000 | #O |
| 0.00002000 | 0.00006000  | 9.93115000  | #O |
| 1.48841000 | 4.52691000  | 8.65098000  | #O |
| 1.48816000 | 1.98319000  | 8.65095000  | #O |
| 0.00008000 | 13.02034200 | 7.38649000  | #O |
| 0.00011000 | 3.25510000  | 6.65714000  | #O |
| 1.48825000 | 1.29279000  | 5.40047000  | #O |
| 1.48829000 | 5.21739000  | 5.40050000  | #O |
| 0.00007000 | 3.25516000  | 4.05392000  | #O |
| 0.00031000 | 0.00016000  | 3.49878000  | #O |
| 1.48777000 | 4.44008000  | 2.10223000  | #O |
| 1.48888000 | 2.07024000  | 2.10232000  | #O |
| 5.95309900 | 13.02014200 | 0.95207000  | #O |
| 5.95212900 | 6.51995000  | 22.88197000 | #O |
| 1.49419000 | 10.96038000 | 21.70672000 | #O |

|            |             |             |    |
|------------|-------------|-------------|----|
| 1.49785000 | 8.56708000  | 21.70441000 | #O |
| 0.00026000 | 0.00133000  | 20.31830000 | #O |
| 5.95304900 | 9.76466000  | 19.74212000 | #O |
| 1.48848000 | 7.80018000  | 18.41360000 | #O |
| 1.48845000 | 11.73111000 | 18.41373000 | #O |
| 5.95309900 | 9.76564000  | 17.15662000 | #O |
| 5.95312900 | 6.50988000  | 16.43009000 | #O |
| 1.48796000 | 11.03782000 | 15.16265000 | #O |
| 1.48878000 | 8.49339000  | 15.16250000 | #O |
| 0.00003000 | 0.00000000  | 13.88588000 | #O |
| 5.95309900 | 9.76526000  | 13.18656000 | #O |
| 1.48826000 | 7.78519000  | 11.90708000 | #O |
| 1.48829000 | 11.74555000 | 11.90710000 | #O |
| 0.00002000 | 9.76555000  | 10.63075000 | #O |
| 0.00002000 | 6.51028000  | 9.93106000  | #O |
| 1.48839000 | 11.03765000 | 8.65035000  | #O |
| 1.48808000 | 8.49311000  | 8.65037000  | #O |
| 5.95305900 | 6.51039000  | 7.38649000  | #O |
| 0.00000000 | 9.76546000  | 6.65463000  | #O |
| 1.48837000 | 7.80291000  | 5.40039000  | #O |
| 1.48820000 | 11.72774000 | 5.40037000  | #O |
| 5.95311900 | 9.76529000  | 4.05682000  | #O |
| 5.95310900 | 6.50997000  | 3.49838000  | #O |
| 1.48769000 | 10.94947000 | 2.10207000  | #O |
| 1.48888000 | 8.58113000  | 2.10184000  | #O |
| 0.00011000 | 6.51061000  | 0.95171000  | #O |
| 2.97588000 | 0.00202000  | 22.85684000 | #O |
| 4.46552000 | 4.44312000  | 21.70927000 | #O |
| 4.46472000 | 2.06778000  | 21.70887000 | #O |
| 2.97630000 | 6.50865000  | 20.31900000 | #O |
| 2.97667000 | 3.25503000  | 19.75832000 | #O |
| 4.46495000 | 1.29296000  | 18.41389000 | #O |
| 4.46499000 | 5.21649000  | 18.41377000 | #O |
| 2.97651000 | 3.25504000  | 17.15732000 | #O |
| 2.97662000 | 0.00032000  | 16.43027000 | #O |
| 4.46481000 | 4.52610000  | 15.16330000 | #O |
| 4.46498000 | 1.98385000  | 15.16317000 | #O |
| 2.97661000 | 6.51017000  | 13.88559000 | #O |
| 2.97662000 | 3.25507000  | 13.18504000 | #O |
| 4.46486000 | 1.27525000  | 11.90722000 | #O |
| 4.46487000 | 5.23490000  | 11.90718000 | #O |
| 2.97667000 | 3.25507000  | 10.62980000 | #O |
| 2.97661000 | 0.00002000  | 9.93117000  | #O |
| 4.46502000 | 4.52681000  | 8.65100000  | #O |
| 4.46482000 | 1.98330000  | 8.65103000  | #O |
| 2.97666000 | 13.02035200 | 7.38655000  | #O |
| 2.97656000 | 3.25515000  | 6.65709000  | #O |
| 4.46490000 | 1.29278000  | 5.40039000  | #O |
| 4.46483000 | 5.21747000  | 5.40034000  | #O |
| 2.97645000 | 3.25522000  | 4.05397000  | #O |
| 2.97670000 | 0.00028000  | 3.49847000  | #O |
| 4.46423000 | 4.43982000  | 2.10217000  | #O |
| 4.46548000 | 2.07033000  | 2.10209000  | #O |
| 2.97651000 | 13.02005200 | 0.95174000  | #O |
| 2.97611000 | 6.51146000  | 22.86471000 | #O |

|            |             |             |     |
|------------|-------------|-------------|-----|
| 4.45835000 | 10.96186000 | 21.70232000 | #O  |
| 4.45576000 | 8.56597000  | 21.70065000 | #O  |
| 2.97630000 | 0.00177000  | 20.31782000 | #O  |
| 2.97646000 | 9.76567000  | 19.75756000 | #O  |
| 4.46476000 | 7.80026000  | 18.41345000 | #O  |
| 4.46471000 | 11.73110000 | 18.41367000 | #O  |
| 2.97651000 | 9.76549000  | 17.15719000 | #O  |
| 2.97643000 | 6.50986000  | 16.42986000 | #O  |
| 4.46463000 | 11.03788000 | 15.16251000 | #O  |
| 4.46518000 | 8.49323000  | 15.16237000 | #O  |
| 2.97654000 | 0.00005000  | 13.88592000 | #O  |
| 2.97659000 | 9.76531000  | 13.18659000 | #O  |
| 4.46486000 | 7.78512000  | 11.90705000 | #O  |
| 4.46486000 | 11.74565000 | 11.90707000 | #O  |
| 2.97655000 | 9.76539000  | 10.63063000 | #O  |
| 2.97659000 | 6.51024000  | 9.93107000  | #O  |
| 4.46501000 | 11.03777000 | 8.65033000  | #O  |
| 4.46470000 | 8.49304000  | 8.65040000  | #O  |
| 2.97649000 | 6.51038000  | 7.38647000  | #O  |
| 2.97668000 | 9.76530000  | 6.65464000  | #O  |
| 4.46490000 | 7.80294000  | 5.40043000  | #O  |
| 4.46485000 | 11.72775000 | 5.40047000  | #O  |
| 2.97663000 | 9.76543000  | 4.05676000  | #O  |
| 2.97630000 | 6.50994000  | 3.49872000  | #O  |
| 4.46450000 | 10.94912000 | 2.10204000  | #O  |
| 4.46533000 | 8.58153000  | 2.10193000  | #O  |
| 2.97662000 | 6.51054000  | 0.95203000  | #O  |
| 5.95109000 | 9.30153000  | 24.19915000 | #O  |
| 5.95307900 | 3.25443000  | 21.54204000 | #Ti |
| 1.49857000 | 6.51363000  | 21.81878000 | #Ti |
| 5.95304900 | 6.51200000  | 18.45382000 | #Ti |
| 1.48814000 | 3.25579000  | 18.39038000 | #Ti |
| 0.00013000 | 3.25527000  | 15.15091000 | #Ti |
| 1.48835000 | 13.01935200 | 15.16421000 | #Ti |
| 0.00002000 | 13.02041200 | 11.90326000 | #Ti |
| 1.48824000 | 3.25525000  | 11.90509000 | #Ti |
| 0.00009000 | 3.25521000  | 8.65681000  | #Ti |
| 1.48827000 | 13.02025200 | 8.64429000  | #Ti |
| 0.00004000 | 0.00010000  | 5.35275000  | #Ti |
| 1.48830000 | 3.25511000  | 5.42580000  | #Ti |
| 5.95299900 | 3.25515000  | 2.27980000  | #Ti |
| 1.48806000 | 0.00045000  | 1.97617000  | #Ti |
| 5.94377900 | 9.76589000  | 21.61235000 | #Ti |
| 1.48730000 | 13.01575000 | 21.83276000 | #Ti |
| 5.95301900 | 13.01872000 | 18.45401000 | #Ti |
| 1.48375000 | 9.76467000  | 18.38967000 | #Ti |
| 5.95301900 | 9.76509000  | 15.15398000 | #Ti |
| 1.48820000 | 6.51109000  | 15.16452000 | #Ti |
| 5.95314900 | 6.51022000  | 11.90347000 | #Ti |
| 1.48838000 | 9.76536000  | 11.90094000 | #Ti |
| 0.00001000 | 9.76511000  | 8.66045000  | #Ti |
| 1.48842000 | 6.51038000  | 8.64440000  | #Ti |
| 0.00002000 | 6.51012000  | 5.35222000  | #Ti |
| 1.48826000 | 9.76531000  | 5.42475000  | #Ti |
| 0.00033000 | 9.76517000  | 2.27766000  | #Ti |

|            |             |             |     |
|------------|-------------|-------------|-----|
| 1.48838000 | 6.50986000  | 1.97645000  | #Ti |
| 2.97666000 | 3.25432000  | 21.54182000 | #Ti |
| 4.45451000 | 6.51558000  | 21.81867000 | #Ti |
| 2.97662000 | 6.51196000  | 18.45432000 | #Ti |
| 4.46501000 | 3.25577000  | 18.39036000 | #Ti |
| 2.97647000 | 3.25545000  | 15.15085000 | #Ti |
| 4.46476000 | 13.01935200 | 15.16425000 | #Ti |
| 2.97658000 | 13.02042200 | 11.90331000 | #Ti |
| 4.46487000 | 3.25520000  | 11.90519000 | #Ti |
| 2.97641000 | 3.25516000  | 8.65679000  | #Ti |
| 4.46480000 | 13.02030200 | 8.64426000  | #Ti |
| 2.97658000 | 0.00010000  | 5.35239000  | #Ti |
| 4.46489000 | 3.25509000  | 5.42580000  | #Ti |
| 2.97676000 | 3.25513000  | 2.27983000  | #Ti |
| 4.46421000 | 0.00102000  | 1.97603000  | #Ti |
| 2.98473000 | 9.76753000  | 21.52944000 | #Ti |
| 4.46582000 | 13.01270000 | 21.83324000 | #Ti |
| 2.97666000 | 13.01872000 | 18.45426000 | #Ti |
| 4.46963000 | 9.76463000  | 18.38965000 | #Ti |
| 2.97665000 | 9.76511000  | 15.15399000 | #Ti |
| 4.46474000 | 6.51123000  | 15.16453000 | #Ti |
| 2.97658000 | 6.51023000  | 11.90337000 | #Ti |
| 4.46489000 | 9.76524000  | 11.90141000 | #Ti |
| 2.97653000 | 9.76520000  | 8.66050000  | #Ti |
| 4.46482000 | 6.51040000  | 8.64435000  | #Ti |
| 2.97649000 | 6.51010000  | 5.35271000  | #Ti |
| 4.46486000 | 9.76529000  | 5.42456000  | #Ti |
| 2.97625000 | 9.76533000  | 2.27762000  | #Ti |
| 4.46552000 | 6.50946000  | 1.97628000  | #Ti |

## References

- 1 D. González, J. Heras-Domingo, S. Pantaleone, A. Rimola, L. Rodríguez-Santiago, X. Solans-Monfort and M. Sodupe, Water Adsorption on MO<sub>2</sub> (M = Ti, Ru, and Ir) Surfaces. Importance of Octahedral Distortion and Cooperative Effects, *ACS Omega*, 2019, **4**, 2989–2999.
